# Supplementary material for: Integrating omics reveals insights into tomato abaxial/adaxial leafy supplemental lighting
Source: Front Plant Sci. 2023 Apr 5;14:1118895. doi: 10.3389/fpls.2023.1118895 (PMC10113477; doi:10.3389/fpls.2023.1118895)
Supplement: Supplementary file 5 [file Table_2.xlsx]

## Sheet: Sheet1
Supplemental Table S2. Differentially expressed genes (DEGs) between the abaxial leafy supplemental lightning (AB) samples and the adaxial leafy supplemental lightning (AD) samples.
GeneID	Length	IT-Expression	UT-Expression	log2Ratio (AB/AD)	q-value	Up-Down-Regulation (AB/AD)	p-value	Symbol	Cellular Component	Molecular Function	Biological Process	Kegg Orthology	Nr Description
101261588	1099	148180	25566.5	-2.51099	0	Down	0	LOC101261588	NA	NA	NA	K02883//large subunit ribosomal protein L18e;K00430//peroxidase [EC:1.11.1.7];K11855//ubiquitin carboxyl-terminal hydrolase 36/42 [EC:3.4.19.12]	gi|991820280|ref|NP_001307023.1|//proline-rich protein precursor [Solanum lycopersicum]
544123	807	300933	143639	-1.04297	0	Down	0	PR1b1	GO:0005576//extracellular region	NA	GO:0050832//defense response to fungus;GO:0031640//killing of cells of other organism	K13449//pathogenesis-related protein 1	gi|350537861|ref|NP_001234314.1|//pathogenesis-related leaf protein 6 precursor [Solanum lycopersicum]
101250163	686	17564.9	71705.3	2.05342	0	Up	0	HTA6	GO:0000790//nuclear chromatin;GO:0000786//nucleosome	GO:0003677//DNA binding;GO:0046982//protein heterodimerization activity	GO:0006342//chromatin silencing	K11251//histone H2A	gi|823683761|ref|NP_001296309.1|//histone H2A.1 [Solanum lycopersicum]
100191111	832	90427	27050.6	-1.71706	0	Down	0	LOC100191111	GO:0005576//extracellular region	NA	NA	K13449//pathogenesis-related protein 1	gi|350538759|ref|NP_001234358.1|//PR1 protein precursor [Solanum lycopersicum]
101245993	2163	52871.7	10017.1	-2.376	0	Down	0	LOC101245993	NA	NA	NA	K03006//DNA-directed RNA polymerase II subunit RPB1 [EC:2.7.7.6];K10955//mucin-2	gi|723733276|ref|XP_010326910.1|//PREDICTED: extensin-2 [Solanum lycopersicum]
544148	1154	101176	36283.6	-1.45544	0	Down	0	CHI9	GO:0005618//cell wall;GO:0005576//extracellular region;GO:0005773//vacuole	GO:0008061//chitin binding;GO:0004568//chitinase activity	GO:0006032//chitin catabolic process;GO:0016998//cell wall macromolecule catabolic process;GO:0006952//defense response;GO:0000272//polysaccharide catabolic process	K20547//basic endochitinase B [EC:3.2.1.14];K01183//chitinase [EC:3.2.1.14]	gi|350534566|ref|NP_001234403.1|//basic 30 kDa endochitinase precursor [Solanum lycopersicum]
101255652	1045	294.72	26428.2	6.51063	0	Up	0	LOC101255652	NA	NA	NA	NA	gi|460410012|ref|XP_004250426.1|//PREDICTED: wound-induced proteinase inhibitor 2-like [Solanum lycopersicum]
543971	925	4096	33204	3.0431	0	Up	0	LOC543971	GO:0009505//plant-type cell wall;GO:0009506//plasmodesma;GO:0005576//extracellular region	NA	NA	K04733//interleukin-1 receptor-associated kinase 4 [EC:2.7.11.1]	gi|350535593|ref|NP_001234714.1|//osmotin-like protein precursor [Solanum lycopersicum]
BGI_novel_G021628	1207	41294.1	9172.43	-2.14653	0	Down	0	NA	GO:0005618//cell wall;GO:0005576//extracellular region;GO:0005773//vacuole	GO:0008061//chitin binding;GO:0004568//chitinase activity	GO:0006032//chitin catabolic process;GO:0006952//defense response;GO:0016998//cell wall macromolecule catabolic process;GO:0000272//polysaccharide catabolic process	K20547//basic endochitinase B [EC:3.2.1.14]	NP_001234403.1//basic 30 kDa endochitinase precursor [Solanum lycopersicum]
544052	1302	105398	47744.4	-1.11841	0	Down	0	ACO1	NA	GO:0046872//metal ion binding;GO:0009815//1-aminocyclopropane-1-carboxylate oxidase activity;GO:0051213//dioxygenase activity;GO:0031418//L-ascorbic acid binding	GO:0009693//ethylene biosynthetic process;GO:0009835//fruit ripening;GO:0055114//oxidation-reduction process	K05933//aminocyclopropanecarboxylate oxidase [EC:1.14.17.4]	gi|902763266|ref|NP_001234024.2|//1-aminocyclopropane-1-carboxylate oxidase 1 [Solanum lycopersicum]
BGI_novel_G021688	1402	24990.5	2627.59	-3.22554	0	Down	0	NA	GO:0005576//extracellular region	GO:0046872//metal ion binding;GO:0020037//heme binding;GO:0004601//peroxidase activity	GO:0006979//response to oxidative stress;GO:0042744//hydrogen peroxide catabolic process	K00430//peroxidase [EC:1.11.1.7]	XP_004249055.1//PREDICTED: cationic peroxidase 1 [Solanum lycopersicum]
101260070	3531	18699.7	442.59	-5.37687	0	Down	0	LOC101260070	GO:0005739//mitochondrion	GO:0004375//glycine dehydrogenase (decarboxylating) activity	GO:0006546//glycine catabolic process;GO:0055114//oxidation-reduction process	K00281//glycine dehydrogenase [EC:1.4.4.2]	gi|460399143|ref|XP_004245101.1|//PREDICTED: glycine dehydrogenase (decarboxylating), mitochondrial [Solanum lycopersicum]
778214	777	78479	31564.9	-1.28995	0	Down	0	ltpg1	NA	GO:0008289//lipid binding	GO:0006869//lipid transport	NA	gi|350535973|ref|NP_001234735.1|//non-specific lipid transfer protein precursor [Solanum lycopersicum]
BGI_novel_G000001	11580	39350.1	86248.2	1.15616	0	Up	0	NA	GO:0009507//chloroplast	GO:0003723//RNA binding	GO:0006397//mRNA processing;GO:0008380//RNA splicing;GO:0008033//tRNA processing	K02111//F-type H+-transporting ATPase subunit alpha [EC:3.6.3.14];K20000//maturase K	ARO73770.1//maturase K (chloroplast) [Nassella trichotoma]
101268153	1227	28036.5	4541.41	-2.60206	0	Down	0	LOC101268153	NA	NA	NA	K00430//peroxidase [EC:1.11.1.7]	gi|460407226|ref|XP_004249055.1|//PREDICTED: cationic peroxidase 1 [Solanum lycopersicum]
101256941	683	6099.88	30656.1	2.35335	0	Up	0	LOC101256941	GO:0009506//plasmodesma;GO:0009579//thylakoid;GO:0005774//vacuolar membrane;GO:0005730//nucleolus;GO:0005829//cytosol;GO:0005886//plasma membrane;GO:0000786//nucleosome;GO:0009507//chloroplast	GO:0003677//DNA binding;GO:0046982//protein heterodimerization activity	GO:0006334//nucleosome assembly	K11254//histone H4	gi|195617694|gb|ACG30677.1|//histone H4 [Zea mays]
101253117	2206	16665.4	401.09	-5.35275	0	Down	0	LOC101253117	GO:0005737//cytoplasm	GO:0005524//ATP binding	GO:0042026//protein refolding	K04077//chaperonin GroEL	gi|460366131|ref|XP_004228946.1|//PREDICTED: ruBisCO large subunit-binding protein subunit beta, chloroplastic [Solanum lycopersicum]
778282	593	6271	28689	2.21776	0	Up	0	H2B-1	GO:0000788//nuclear nucleosome	GO:0003677//DNA binding;GO:0046982//protein heterodimerization activity	GO:0006334//nucleosome assembly	K11252//histone H2B	gi|350536407|ref|NP_001233989.1|//histone H2B.1 [Solanum lycopersicum]
BGI_novel_G023200	1119	15878.2	1103.9	-3.82233	0	Down	0	NA	GO:0005576//extracellular region	GO:0046872//metal ion binding;GO:0020037//heme binding;GO:0004601//peroxidase activity	GO:0006979//response to oxidative stress;GO:0042744//hydrogen peroxide catabolic process	K00430//peroxidase [EC:1.11.1.7]	XP_004250402.1//PREDICTED: lignin-forming anionic peroxidase [Solanum lycopersicum]
543603	3534	39849	12434.8	-1.65612	0	Down	0	Wfi1	GO:0016021//integral component of membrane	GO:0050664//oxidoreductase activity, acting on NAD(P)H, oxygen as acceptor;GO:0005509//calcium ion binding;GO:0004601//peroxidase activity	GO:0098869//cellular oxidant detoxification;GO:0055114//oxidation-reduction process	K13447//respiratory burst oxidase [EC:1.6.3.- 1.11.1.-]	gi|908212423|ref|NP_001234271.2|//whitefly-induced gp91-phox [Solanum lycopersicum]
BGI_novel_G005421	1666	15028.9	42645.5	1.52869	0	Up	0	NA	NA	NA	NA	K01673//carbonic anhydrase [EC:4.2.1.1]	NP_001299833.1//carbonic anhydrase isoform 2 [Solanum lycopersicum]
101262737	1543	45989.3	16490.6	-1.45562	0	Down	0	LOC101262737	NA	NA	NA	K03097//casein kinase II subunit alpha [EC:2.7.11.1]	gi|460399325|ref|XP_004245192.1|//PREDICTED: uncharacterized protein LOC101262737 [Solanum lycopersicum]
544082	895	82147.9	40352.8	-1.00152	0	Down	0	TPM-1	NA	NA	NA	K04733//interleukin-1 receptor-associated kinase 4 [EC:2.7.11.1]	gi|823270993|ref|NP_001296216.1|//osmotin-like protein TPM-1 precursor [Solanum lycopersicum]
543953	536	30333	7783	-1.93846	0	Down	0	ER1	GO:0005576//extracellular region	GO:0004867//serine-type endopeptidase inhibitor activity	GO:0009611//response to wounding;GO:0010951//negative regulation of endopeptidase activity	NA	gi|350538787|ref|NP_001234615.1|//ethylene-responsive proteinase inhibitor 1 precursor [Solanum lycopersicum]
BGI_novel_G007557	1439	8822	31462.8	1.8585	0	Up	0	NA	GO:0005737//cytoplasm	GO:0046872//metal ion binding;GO:0046914//transition metal ion binding	GO:0030001//metal ion transport;GO:0046916//cellular transition metal ion homeostasis	K04733//interleukin-1 receptor-associated kinase 4 [EC:2.7.11.1];K07213//copper chaperone	XP_004235318.1//PREDICTED: heavy metal-associated isoprenylated plant protein 3 [Solanum lycopersicum]
BGI_novel_G012884	1705	34074.1	9847.21	-1.76686	0	Down	0	NA	GO:0005622//intracellular	GO:0005524//ATP binding;GO:0004707//MAP kinase activity	NA	K20536//mitogen-activated protein kinase 3 [EC:2.7.11.24]	XP_017616979.1//PREDICTED: mitogen-activated protein kinase 3 [Gossypium arboreum]
BGI_novel_G016151	1063	31549.5	8602.94	-1.85068	0	Down	0	NA	NA	GO:0000287//magnesium ion binding;GO:0010333//terpene synthase activity	GO:0008152//metabolic process	K15803//(-)-germacrene D synthase [EC:4.2.3.75]	XP_019070211.1//PREDICTED: (-)-germacrene D synthase [Solanum lycopersicum]
778354	609	6553.44	26819.4	2.05698	0	Up	0	H2B-2	GO:0000788//nuclear nucleosome	GO:0003677//DNA binding;GO:0046982//protein heterodimerization activity	GO:0006334//nucleosome assembly	K11252//histone H2B	gi|823630986|ref|NP_001296295.1|//histone H2B.2 [Solanum lycopersicum]
101257650	1176	2146.84	16951.4	3.00515	0	Up	0	LOC101257650	NA	NA	NA	K07213//copper chaperone;K10752//histone-binding protein RBBP4	gi|460381852|ref|XP_004236655.1|//PREDICTED: golgin subfamily A member 6-like protein 22 [Solanum lycopersicum]
101243631	2372	69000.9	32259	-1.07288	0	Down	0	LOC101243631	GO:0005737//cytoplasm	GO:0045548//phenylalanine ammonia-lyase activity	GO:0009800//cinnamic acid biosynthetic process;GO:0006559//L-phenylalanine catabolic process	K10775//phenylalanine ammonia-lyase [EC:4.3.1.24]	gi|460402295|ref|XP_004246649.1|//PREDICTED: phenylalanine ammonia-lyase-like isoform X1 [Solanum lycopersicum]
101262334	1771	1638.28	15441.8	3.26062	0	Up	0	LOC101262334	NA	NA	NA	K09273//upstream-binding transcription factor	gi|460400021|ref|XP_004245534.1|//PREDICTED: high mobility group B protein 6-like [Solanum lycopersicum]
101265605	986	28567.6	7466.49	-1.91185	0	Down	0	LOC101265605	GO:0010287//plastoglobule;GO:0009535//chloroplast thylakoid membrane;GO:0009523//photosystem II;GO:0016021//integral component of membrane;GO:0009941//chloroplast envelope;GO:0009522//photosystem I	GO:0031409//pigment binding;GO:0046872//metal ion binding;GO:0016168//chlorophyll binding	GO:0009768//photosynthesis, light harvesting in photosystem I;GO:0009416//response to light stimulus;GO:0018298//protein-chromophore linkage	K08912//light-harvesting complex II chlorophyll a/b binding protein 1	gi|460374596|ref|XP_004233096.1|//PREDICTED: chlorophyll a-b binding protein 1C, chloroplastic [Solanum lycopersicum]
101264700	1780	25645.5	57164.1	1.18044	0	Up	0	LOC101264700	GO:0005737//cytoplasm	GO:0003746//translation elongation factor activity;GO:0005525//GTP binding;GO:0003924//GTPase activity	GO:0006414//translational elongation	K03231//elongation factor 1-alpha	gi|460411512|ref|XP_004251154.1|//PREDICTED: elongation factor 1-alpha-like [Solanum lycopersicum]
101252060	2264	36235.4	11707.1	-1.60598	0	Down	0	LOC101252060	NA	NA	NA	K15404//aldehyde decarbonylase [EC:4.1.99.5]	gi|460378168|ref|XP_004234847.1|//PREDICTED: protein ECERIFERUM 1-like [Solanum lycopersicum]
543807	2745	56822.3	24631	-1.18195	0	Down	0	adc1	NA	GO:0008792//arginine decarboxylase activity	GO:0033388//putrescine biosynthetic process from arginine;GO:0008295//spermidine biosynthetic process;GO:0006527//arginine catabolic process	K01583//arginine decarboxylase [EC:4.1.1.19]	gi|350537969|ref|NP_001234064.1|//arginine decarboxylase [Solanum lycopersicum]
101264286	962	67679.4	32272	-1.0444	0	Down	0	LOC101264286	GO:0010287//plastoglobule;GO:0009535//chloroplast thylakoid membrane;GO:0009523//photosystem II;GO:0016021//integral component of membrane;GO:0009941//chloroplast envelope;GO:0009522//photosystem I	GO:0031409//pigment binding;GO:0046872//metal ion binding;GO:0016168//chlorophyll binding	GO:0009768//photosynthesis, light harvesting in photosystem I;GO:0009416//response to light stimulus;GO:0018298//protein-chromophore linkage	K08912//light-harvesting complex II chlorophyll a/b binding protein 1	gi|460374596|ref|XP_004233096.1|//PREDICTED: chlorophyll a-b binding protein 1C, chloroplastic [Solanum lycopersicum]
BGI_novel_G015812	1249	16920.4	43106.8	1.37318	0	Up	0	NA	GO:0005618//cell wall;GO:0005576//extracellular region	GO:0045735//nutrient reservoir activity;GO:0030145//manganese ion binding	NA	NA	XP_004243715.1//PREDICTED: auxin-binding protein ABP19a-like [Solanum lycopersicum]
101253856	1002	4256.75	20781	2.31148	0	Up	0	LOC101253856	NA	NA	NA	K03006//DNA-directed RNA polymerase II subunit RPB1 [EC:2.7.7.6];K10955//mucin-2	gi|460374183|ref|XP_004232891.1|//PREDICTED: pistil-specific extensin-like protein [Solanum lycopersicum]
BGI_novel_G006283	853	2121.45	15646.6	2.90676	0	Up	0	NA	GO:0010287//plastoglobule;GO:0009535//chloroplast thylakoid membrane;GO:0009523//photosystem II;GO:0016021//integral component of membrane;GO:0009941//chloroplast envelope;GO:0009522//photosystem I	GO:0031409//pigment binding;GO:0016168//chlorophyll binding	GO:0009768//photosynthesis, light harvesting in photosystem I;GO:0009416//response to light stimulus;GO:0018298//protein-chromophore linkage	K08912//light-harvesting complex II chlorophyll a/b binding protein 1	XP_015069551.1//PREDICTED: chlorophyll a-b binding protein 3C, chloroplastic [Solanum pennellii]
544081	497	3092.17	17773.7	2.54709	0	Up	0	LOC544081	GO:0009506//plasmodesma;GO:0009579//thylakoid;GO:0005774//vacuolar membrane;GO:0005730//nucleolus;GO:0005829//cytosol;GO:0005886//plasma membrane;GO:0000786//nucleosome;GO:0009507//chloroplast	GO:0003677//DNA binding;GO:0046982//protein heterodimerization activity	GO:0006334//nucleosome assembly	K11254//histone H4	gi|195617694|gb|ACG30677.1|//histone H4 [Zea mays]
544296	2407	12291.7	34403.6	1.50891	0	Up	0	P69B	GO:0005618//cell wall	GO:0004252//serine-type endopeptidase activity	GO:0006508//proteolysis	K04733//interleukin-1 receptor-associated kinase 4 [EC:2.7.11.1];K08653//membrane-bound transcription factor site-1 protease [EC:3.4.21.112];K13199//plasminogen activator inhibitor 1 RNA-binding protein	gi|350536267|ref|NP_001233982.1|//subtilisin-like protease precursor [Solanum lycopersicum]
544080	520	17470.8	42518.3	1.30717	0	Up	0	LOC544080	GO:0009506//plasmodesma;GO:0009579//thylakoid;GO:0005774//vacuolar membrane;GO:0005730//nucleolus;GO:0005829//cytosol;GO:0005886//plasma membrane;GO:0000786//nucleosome;GO:0009507//chloroplast	GO:0003677//DNA binding;GO:0046982//protein heterodimerization activity	GO:0006334//nucleosome assembly	K11254//histone H4	gi|195617694|gb|ACG30677.1|//histone H4 [Zea mays]
101252889	1046	15072.1	38151.5	1.3639	0	Up	0	LOC101252889	NA	NA	NA	K11254//histone H4	gi|723710790|ref|XP_010322955.1|//PREDICTED: uncharacterized protein LOC101252889 [Solanum lycopersicum]
101246514	1627	7247.49	25076.1	1.81479	0	Up	0	LOC101246514	NA	NA	NA	NA	gi|460378333|ref|XP_004234927.1|//PREDICTED: BAG family molecular chaperone regulator 7 [Solanum lycopersicum]
101258081	1909	22802.4	5735.96	-1.96705	0	Down	0	LOC101258081	NA	NA	NA	K15803//(-)-germacrene D synthase [EC:4.2.3.75]	gi|723715797|ref|XP_004243482.2|//PREDICTED: (-)-germacrene D synthase [Solanum lycopersicum]
BGI_novel_G017253	1768	21364.4	47531.9	1.17772	0	Up	0	NA	GO:0005874//microtubule;GO:0005737//cytoplasm	GO:0005200//structural constituent of cytoskeleton;GO:0005525//GTP binding;GO:0003924//GTPase activity	GO:0007017//microtubule-based process	K07374//tubulin alpha	XP_004244533.1//PREDICTED: tubulin alpha-3 chain [Solanum lycopersicum]
101261650	1284	49185.2	21699.5	-1.15653	0	Down	0	LOC101261650	GO:0046658//anchored component of plasma membrane;GO:0005773//vacuole	GO:0042973//glucan endo-1,3-beta-D-glucosidase activity;GO:0030247//polysaccharide binding	GO:0006952//defense response;GO:0005975//carbohydrate metabolic process	K19891//glucan endo-1,3-beta-glucosidase 1/2/3 [EC:3.2.1.39]	gi|350537435|ref|NP_001234805.1|//glucan endo-1,3-beta-glucosidase B precursor [Solanum lycopersicum]
101261185	609	16808.9	40229.2	1.28305	0	Up	0	H2B-3	GO:0000788//nuclear nucleosome	GO:0003677//DNA binding;GO:0046982//protein heterodimerization activity	GO:0006334//nucleosome assembly	K11252//histone H2B	gi|971574037|ref|XP_015170357.1|//PREDICTED: histone H2B.3 [Solanum tuberosum]
BGI_novel_G003804	3957	15289.1	2375.12	-2.6624	0	Down	0	NA	GO:0016021//integral component of membrane	GO:0005524//ATP binding;GO:0005388//calcium-transporting ATPase activity;GO:0005516//calmodulin binding	NA	K01537//Ca2+-transporting ATPase [EC:3.6.3.8]	XP_009587554.1//PREDICTED: LOW QUALITY PROTEIN: calcium-transporting ATPase 2, plasma membrane-type-like [Nicotiana tomentosiformis]
101243998	1341	30744.9	10433.8	-1.53504	0	Down	0	LOC101243998	NA	NA	NA	K00344//NADPH2:quinone reductase [EC:1.6.5.5]	gi|856116680|ref|NP_001297054.1|//phosphoglycerate mutase family protein [Solanum lycopersicum]
BGI_novel_G003349	2025	27204.7	8578.9	-1.64096	0	Down	0	NA	GO:0016021//integral component of membrane	NA	NA	K19476//vacuolar protein sorting-associated protein IST1;K14209//solute carrier family 36 (proton-coupled amino acid transporter);K15015//solute carrier family 32 (vesicular inhibitory amino acid transporter)	XP_011088674.1//lysine histidine transporter-like 8 [Sesamum indicum]
543758	999	42686.8	18479.5	-1.18383	0	Down	0	LOC543758	NA	GO:0008061//chitin binding	GO:0050832//defense response to fungus;GO:0042742//defense response to bacterium	K20547//basic endochitinase B [EC:3.2.1.14]	gi|460368474|ref|XP_004230091.1|//PREDICTED: wound-induced protein WIN2 [Solanum lycopersicum]
543522	2074	52909.2	25519.5	-1.02789	0	Down	0	ME2	NA	NA	NA	K00029//malate dehydrogenase (oxaloacetate-decarboxylating)(NADP+) [EC:1.1.1.40]	gi|922959905|ref|NP_001233951.2|//cytosolic NADP-malic enzyme [Solanum lycopersicum]
101257228	1328	14337.6	2349.14	-2.58556	0	Down	0	LOC101257228	NA	NA	NA	K00430//peroxidase [EC:1.11.1.7]	gi|460372177|ref|XP_004231908.1|//PREDICTED: peroxidase 51 [Solanum lycopersicum]
BGI_novel_G008410	3709	19185	4621.16	-2.02962	0	Down	0	NA	GO:0016021//integral component of membrane	GO:0050664//oxidoreductase activity, acting on NAD(P)H, oxygen as acceptor;GO:0004601//peroxidase activity;GO:0005509//calcium ion binding	NA	K13447//respiratory burst oxidase [EC:1.6.3.- 1.11.1.-]	NP_001234271.2//whitefly-induced gp91-phox [Solanum lycopersicum]
BGI_novel_G019105	1125	4023.45	17536.5	2.14789	0	Up	0	NA	GO:0005737//cytoplasm	GO:0045548//phenylalanine ammonia-lyase activity	GO:0009800//cinnamic acid biosynthetic process;GO:0006559//L-phenylalanine catabolic process	K10775//phenylalanine ammonia-lyase [EC:4.3.1.24]	NP_001307538.1//phenylalanine ammonia-lyase 3 [Solanum lycopersicum]
BGI_novel_G021627	1306	30280.6	10881.7	-1.45246	0	Down	0	NA	NA	GO:0008061//chitin binding;GO:0004568//chitinase activity	GO:0006032//chitin catabolic process;GO:0016998//cell wall macromolecule catabolic process;GO:0005975//carbohydrate metabolic process	K20547//basic endochitinase B [EC:3.2.1.14];K01183//chitinase [EC:3.2.1.14]	XP_004248637.1//PREDICTED: endochitinase 4 [Solanum lycopersicum]
101259599	10715	34406.4	13481.6	-1.32765	0	Down	0	LOC101259599	NA	NA	NA	K20478//golgin subfamily B member 1	gi|723671826|ref|XP_010316301.1|//PREDICTED: titin isoform X1 [Solanum lycopersicum]
BGI_novel_G014779	690	4257.17	17771.5	2.08563	0	Up	0	NA	GO:0005634//nucleus;GO:0000786//nucleosome	GO:0003677//DNA binding;GO:0046982//protein heterodimerization activity	GO:0006334//nucleosome assembly;GO:0006352//DNA-templated transcription, initiation	K11254//histone H4	XP_016507811.1//PREDICTED: uncharacterized protein LOC107825453 [Nicotiana tabacum]
BGI_novel_G005528	1822	1605.21	11995.9	2.92574	0	Up	0	NA	GO:0005874//microtubule;GO:0005737//cytoplasm	GO:0005200//structural constituent of cytoskeleton;GO:0005525//GTP binding;GO:0003924//GTPase activity	GO:0007017//microtubule-based process	K07374//tubulin alpha	XP_004232226.1//PREDICTED: tubulin alpha chain-like [Solanum lycopersicum]
101264938	1905	2179.89	13308.4	2.63404	0	Up	0	LOC101264938	NA	NA	NA	K17046//protein DEK	gi|723708093|ref|XP_010322503.1|//PREDICTED: protein DEK isoform X1 [Solanum lycopersicum]
101266986	1575	4328.9	17464.1	2.03635	0	Up	0	LOC101266986	NA	NA	NA	K04628//ceramide galactosyltransferase [EC:2.4.1.47];K00699//glucuronosyltransferase [EC:2.4.1.17];K13030//cyanohydrin beta-glucosyltransferase [EC:2.4.1.85]	gi|460371040|ref|XP_004231354.1|//PREDICTED: 7-deoxyloganetin glucosyltransferase-like [Solanum lycopersicum]
101256351	599	1931.98	12350.3	2.70042	0	Up	0	LOC101256351	GO:0009506//plasmodesma;GO:0009579//thylakoid;GO:0005774//vacuolar membrane;GO:0005730//nucleolus;GO:0005829//cytosol;GO:0005886//plasma membrane;GO:0000786//nucleosome;GO:0009507//chloroplast	GO:0003677//DNA binding;GO:0046982//protein heterodimerization activity	GO:0006334//nucleosome assembly	K11254//histone H4	gi|195617694|gb|ACG30677.1|//histone H4 [Zea mays]
101250929	623	7854	23424	1.60052	0	Up	0	LOC101250929	GO:0005634//nucleus;GO:0009536//plastid;GO:0000786//nucleosome	GO:0003677//DNA binding;GO:0046982//protein heterodimerization activity	NA	K11253//histone H3	gi|565487241|ref|XP_006301260.1|//hypothetical protein CARUB_v10021660mg, partial [Capsella rubella]
101260571	624	4619.4	17616	1.95515	0	Up	0	LOC101260571	GO:0005634//nucleus;GO:0009536//plastid;GO:0000786//nucleosome	GO:0003677//DNA binding;GO:0046982//protein heterodimerization activity	NA	K11253//histone H3	gi|565487241|ref|XP_006301260.1|//hypothetical protein CARUB_v10021660mg, partial [Capsella rubella]
BGI_novel_G013821	1288	11196.7	1455	-2.91995	0	Down	0	NA	NA	NA	NA	K12121//phytochrome B;K02184//formin 2	XP_009787077.1//PREDICTED: glycine-rich cell wall structural protein 1.8-like [Nicotiana sylvestris]
BGI_novel_G002860	1366	21023	6250.44	-1.7259	0	Down	0	NA	GO:0005576//extracellular region	NA	NA	K13449//pathogenesis-related protein 1	NP_001234358.1//PR1 protein precursor [Solanum lycopersicum]
101260643	4547	10981.9	1438.91	-2.90805	0	Down	0	LOC101260643	NA	NA	NA	K05681//ATP-binding cassette, subfamily G (WHITE), member 2	gi|460388420|ref|XP_004239865.1|//PREDICTED: pleiotropic drug resistance protein 1-like [Solanum lycopersicum]
101267861	658	8357.62	23897.7	1.53974	0	Up	0	LOC101267861	GO:0005634//nucleus;GO:0009536//plastid;GO:0000786//nucleosome	GO:0003677//DNA binding;GO:0046982//protein heterodimerization activity	NA	K11253//histone H3	gi|565487241|ref|XP_006301260.1|//hypothetical protein CARUB_v10021660mg, partial [Capsella rubella]
101263535	2758	17178.7	4360.8	-1.95392	0	Down	0	LOC101263535	GO:0005737//cytoplasm	GO:0016702//oxidoreductase activity, acting on single donors with incorporation of molecular oxygen, incorporation of two atoms of oxygen;GO:0046872//metal ion binding	GO:0006633//fatty acid biosynthetic process;GO:0055114//oxidation-reduction process;GO:0031408//oxylipin biosynthetic process	K15718//linoleate 9S-lipoxygenase [EC:1.13.11.58]	gi|460398697|ref|XP_004244890.1|//PREDICTED: probable linoleate 9S-lipoxygenase 5 [Solanum lycopersicum]
544272	1281	34596.1	14783.3	-1.20261	0	Down	0	XTH1	GO:0048046//apoplast;GO:0005618//cell wall	GO:0004553//hydrolase activity, hydrolyzing O-glycosyl compounds;GO:0016762//xyloglucan:xyloglucosyl transferase activity	GO:0010411//xyloglucan metabolic process;GO:0042546//cell wall biogenesis;GO:0071555//cell wall organization	K08235//xyloglucan:xyloglucosyl transferase [EC:2.4.1.207]	gi|350540046|ref|NP_001233858.1|//probable xyloglucan endotransglucosylase/hydrolase 1 precursor [Solanum lycopersicum]
101246688	3867	25993.9	9445.88	-1.43638	0	Down	0	LOC101246688	NA	NA	NA	K01537//Ca2+-transporting ATPase [EC:3.6.3.8]	gi|460375325|ref|XP_004233457.1|//PREDICTED: calcium-transporting ATPase 2, plasma membrane-type-like [Solanum lycopersicum]
101248706	2565	20439.8	6292.52	-1.67564	0	Down	0	LOC101248706	NA	NA	NA	K13862//solute carrier family 4 (sodium borate transporter), member 11;K06573//solute carrier family 4 (anion exchanger), member 1	gi|723657158|ref|XP_010319275.1|//PREDICTED: boron transporter 1 isoform X1 [Solanum lycopersicum]
101263845	700	4173	15977	1.96087	0	Up	0	LOC101263845	GO:0005634//nucleus;GO:0009536//plastid;GO:0000786//nucleosome	GO:0003677//DNA binding;GO:0046982//protein heterodimerization activity	NA	K11253//histone H3	gi|565487241|ref|XP_006301260.1|//hypothetical protein CARUB_v10021660mg, partial [Capsella rubella]
100736441	1361	42678.3	20617.6	-1.0256	0	Down	0	LOC100736441	GO:0005768//endosome;GO:0005802//trans-Golgi network	NA	NA	K06699//proteasome activator subunit 4;K12472//epidermal growth factor receptor substrate 15	gi|350540638|ref|NP_001234521.1|//BURP domain-containing protein precursor [Solanum lycopersicum]
BGI_novel_G007824	2507	15555	3810	-2.00548	0	Down	0	NA	NA	NA	NA	NA	XP_004236294.1//PREDICTED: protein SIEVE ELEMENT OCCLUSION B-like [Solanum lycopersicum]
101256975	1050	39311.7	18588.9	-1.05648	0	Down	0	LOC101256975	NA	NA	NA	NA	gi|460389806|ref|XP_004240539.1|//PREDICTED: universal stress protein A-like protein [Solanum lycopersicum]
101261140	1497	32271.3	13934.9	-1.18751	0	Down	0	LOC101261140	NA	NA	NA	K10450//kelch-like protein 12;K10457//kelch-like protein 20;K10443//kelch-like protein 2/3	gi|460398177|ref|XP_004244639.1|//PREDICTED: B2 protein-like [Solanum lycopersicum]
BGI_novel_G008490	1143	1597.39	10263.1	2.70771	0	Up	0	NA	NA	NA	NA	K04733//interleukin-1 receptor-associated kinase 4 [EC:2.7.11.1]	XP_004235810.1//PREDICTED: thaumatin-like protein [Solanum lycopersicum]
108491835	944	27103.4	10717.9	-1.31442	0	Down	0	Cab-3C	NA	NA	NA	K08912//light-harvesting complex II chlorophyll a/b binding protein 1	gi|460376914|ref|XP_004234241.1|//PREDICTED: uncharacterized protein LOC101245729 [Solanum lycopersicum]
104649361	846	13964	3211	-2.09658	0	Down	0	LOC104649361	NA	NA	NA	NA	gi|723731731|ref|XP_010326644.1|//PREDICTED: uncharacterized protein LOC104649361 [Solanum lycopersicum]
BGI_novel_G018364	2413	37967	17957	-1.05617	0	Down	0	NA	NA	GO:0016787//hydrolase activity	GO:0046856//phosphatidylinositol dephosphorylation	K20279//synaptojanin [EC:3.1.3.36]	NP_001234789.1//inositol-1,4,5-triphosphate-5-phosphatase [Solanum lycopersicum]
BGI_novel_G025083	1825	17223.3	5110.36	-1.72883	0	Down	0	NA	GO:0016020//membrane;GO:0016021//integral component of membrane	GO:0016709//oxidoreductase activity, acting on paired donors, with incorporation or reduction of molecular oxygen, NAD(P)H as one donor, and incorporation of one atom of oxygen;GO:0016705//oxidoreductase activity, acting on paired donors, with incorporation or reduction of molecular oxygen;GO:0020037//heme binding;GO:0005506//iron ion binding;GO:0004497//monooxygenase activity	GO:0044550//secondary metabolite biosynthetic process	K20562//biphenyl-4-hydroxylase	XP_004252295.1//PREDICTED: cytochrome P450 CYP736A12-like [Solanum lycopersicum]
101244425	1288	14047.1	3459.29	-1.99769	0	Down	0	LOC101244425	NA	GO:0008270//zinc ion binding	NA	K10664//E3 ubiquitin-protein ligase ATL6/9/15/31/42/55 [EC:2.3.2.27];K16274//E3 ubiquitin-protein ligase AIP2 [EC:2.3.2.27]	gi|723665052|ref|XP_010315196.1|//PREDICTED: E3 ubiquitin-protein ligase MBR2 [Solanum lycopersicum]
101253224	655	4928.53	16398.1	1.75833	0	Up	0	LOC101253224	GO:0005634//nucleus;GO:0009536//plastid;GO:0000786//nucleosome	GO:0003677//DNA binding;GO:0046982//protein heterodimerization activity	NA	K11253//histone H3	gi|565487241|ref|XP_006301260.1|//hypothetical protein CARUB_v10021660mg, partial [Capsella rubella]
BGI_novel_G017244	732	1636.57	9799.49	2.60606	0	Up	0	NA	GO:0046658//anchored component of plasma membrane	GO:0009055//electron transfer activity	NA	K03006//DNA-directed RNA polymerase II subunit RPB1 [EC:2.7.7.6]	XP_004244524.1//PREDICTED: early nodulin-like protein 3 [Solanum lycopersicum]
101252991	932	17722.8	35649.4	1.03231	0	Up	0	LOC101252991	NA	NA	NA	K11254//histone H4	gi|723704729|ref|XP_004240359.2|//PREDICTED: uncharacterized protein LOC101252991 [Solanum lycopersicum]
101251384	837	179	5969.26	5.08355	0	Up	0	LOC101251384	NA	NA	NA	NA	gi|460389598|ref|XP_004240438.1|//PREDICTED: uncharacterized protein At5g48480 [Solanum lycopersicum]
543723	1449	114.33	5874.73	5.70728	0	Up	0	cycd3c3	GO:0005634//nucleus	NA	NA	K14505//cyclin D3, plant	gi|350536431|ref|NP_001234758.1|//CycD3;3 protein [Solanum lycopersicum]
101264975	675	2291.45	11070.4	2.29641	0	Up	0	LOC101264975	NA	NA	NA	K11251//histone H2A	gi|460404012|ref|XP_004247479.1|//PREDICTED: histone H2AX-like [Solanum lycopersicum]
BGI_novel_G018141	1888	6	9035.06	10.5804	0	Up	0	NA	NA	GO:0046872//metal ion binding;GO:0004097//catechol oxidase activity	GO:0046148//pigment biosynthetic process	K00422//polyphenol oxidase [EC:1.10.3.1]	NP_001318059.1//polyphenol oxidase F, chloroplastic [Solanum lycopersicum]
BGI_novel_G025535	2360	1803.06	9870.63	2.47673	0	Up	0	NA	NA	GO:0003723//RNA binding	NA	K13210//far upstream element-binding protein	XP_004253096.1//PREDICTED: far upstream element-binding protein 2 [Solanum lycopersicum]
101267024	659	18343.3	36135.3	1.00219	0	Up	0	LOC101267024	GO:0005634//nucleus;GO:0000786//nucleosome	GO:0003677//DNA binding;GO:0046982//protein heterodimerization activity	NA	K11252//histone H2B	gi|460388113|ref|XP_004239714.1|//PREDICTED: histone H2B.3 [Solanum lycopersicum]
BGI_novel_G008007	848	374.52	6245.97	4.08384	0	Up	0	NA	NA	NA	NA	K03860//phosphatidylinositol glycan, class Q;K20887//xyloglucan glycosyltransferase 4 [EC:2.4.1.-]	XP_004236143.1//PREDICTED: gibberellin-regulated protein 10 [Solanum lycopersicum]
BGI_novel_G005440	2553	30407.2	13829	-1.11268	0	Down	0	NA	NA	GO:0016491//oxidoreductase activity	NA	K00128//aldehyde dehydrogenase (NAD+) [EC:1.2.1.3]	XP_010316283.1//PREDICTED: aldehyde dehydrogenase family 2 member B7, mitochondrial [Solanum lycopersicum]
101256861	788	1404.48	8836.03	2.6774	0	Up	0	LOC101256861	NA	NA	NA	K03860//phosphatidylinositol glycan, class Q;K20887//xyloglucan glycosyltransferase 4 [EC:2.4.1.-]	gi|460380802|ref|XP_004236143.1|//PREDICTED: gibberellin-regulated protein 10-like [Solanum lycopersicum]
543701	1578	6778.81	537.6	-3.63239	0	Down	0	LOC543701	NA	NA	NA	NA	gi|350539181|ref|NP_001234635.1|//auxin-regulated protein [Solanum lycopersicum]
101253792	712	8743.25	21811.8	1.3429	0	Up	0	LOC101253792	GO:0005634//nucleus;GO:0000786//nucleosome	GO:0003677//DNA binding;GO:0046982//protein heterodimerization activity	NA	K11252//histone H2B	gi|460391268|ref|XP_004241245.1|//PREDICTED: probable histone H2B.1 [Solanum lycopersicum]
BGI_novel_G009012	2262	24262.3	9948.71	-1.2621	0	Down	0	NA	NA	NA	NA	K06027//vesicle-fusing ATPase [EC:3.6.4.6];K01213//galacturan 1,4-alpha-galacturonidase [EC:3.2.1.67]	XP_004237034.1//PREDICTED: F-box/kelch-repeat protein SKIP11-like [Solanum lycopersicum]
BGI_novel_G018673	978	21244.4	8061.79	-1.37388	0	Down	0	NA	NA	NA	NA	K04733//interleukin-1 receptor-associated kinase 4 [EC:2.7.11.1]	NP_001234351.2//PR5-like protein precursor [Solanum lycopersicum]
BGI_novel_G017386	1639	10816.6	2262.35	-2.23332	0	Down	0	NA	GO:0005634//nucleus	GO:0043565//sequence-specific DNA binding;GO:0003700//DNA binding transcription factor activity	GO:0006351//transcription, DNA-templated	K13425//WRKY transcription factor 22;K13459//disease resistance protein RPS2;K13457//disease resistance protein RPM1;K16225//probable WRKY transcription factor 52	XP_004244630.1//PREDICTED: probable WRKY transcription factor 53 [Solanum lycopersicum]
BGI_novel_G020377	944	6628.58	18370	1.49461	0	Up	0	NA	GO:0005634//nucleus;GO:0000786//nucleosome	GO:0003677//DNA binding	GO:0006334//nucleosome assembly	K11275//histone H1/5	XP_004247649.1//PREDICTED: histone H1-like [Solanum lycopersicum]
101257491	2571	13576.1	3654.84	-1.86915	0	Down	0	LOC101257491	NA	NA	NA	K15502//serine/threonine-protein phosphatase 6 regulatory ankyrin repeat subunit A	gi|460398454|ref|XP_004244774.1|//PREDICTED: ankyrin repeat-containing protein At5g02620 [Solanum lycopersicum]
101251775	2142	5877.42	284.61	-4.34409	0	Down	0	AROGP3	GO:0048046//apoplast;GO:0005618//cell wall	NA	GO:0071555//cell wall organization	K06699//proteasome activator subunit 4;K12472//epidermal growth factor receptor substrate 15	gi|822885198|ref|NP_001296190.1|//polygalacturonase non-catalytic subunit AroGP3 precursor [Solanum lycopersicum]
BGI_novel_G021228	899	22178.7	8771.83	-1.31419	0	Down	0	NA	NA	GO:0005524//ATP binding	NA	K06689//ubiquitin-conjugating enzyme E2 D [EC:2.3.2.23]	XP_004248072.1//PREDICTED: ubiquitin-conjugating enzyme E2 28 [Solanum lycopersicum]
100301928	1733	14340	29787.7	1.0787	0	Up	0	SRG2	NA	NA	NA	K04733//interleukin-1 receptor-associated kinase 4 [EC:2.7.11.1]	gi|914099008|ref|NP_001234228.2|//salt responsive protein 2 [Solanum lycopersicum]
101245793	728	3050.41	11934	1.99204	0	Up	0	LOC101245793	GO:0005634//nucleus;GO:0009536//plastid;GO:0000786//nucleosome	GO:0003677//DNA binding;GO:0046982//protein heterodimerization activity	NA	K11253//histone H3	gi|565487241|ref|XP_006301260.1|//hypothetical protein CARUB_v10021660mg, partial [Capsella rubella]
BGI_novel_G012007	558	13210.5	3575.43	-1.86146	0	Down	0	NA	GO:0016021//integral component of membrane;GO:0005886//plasma membrane	NA	GO:0003006//developmental process involved in reproduction	NA	XP_004239248.1//PREDICTED: cysteine-rich and transmembrane domain-containing protein A-like [Solanum lycopersicum]
BGI_novel_G014942	1426	15731.5	31587.2	1.02972	0	Up	0	NA	GO:0005840//ribosome;GO:0022625//cytosolic large ribosomal subunit	GO:0003735//structural constituent of ribosome;GO:0008097//5S rRNA binding	GO:0006412//translation;GO:0000027//ribosomal large subunit assembly	K02932//large subunit ribosomal protein L5e	XP_004242456.1//PREDICTED: 60S ribosomal protein L5 [Solanum lycopersicum]
101246812	1434	13146.1	3592.7	-1.84747	0	Down	0	LOC101246812	NA	NA	NA	K13424//WRKY transcription factor 33;K18834//WRKY transcription factor 1	gi|948284301|ref|NP_001303844.1|//probable WRKY transcription factor 40 [Solanum lycopersicum]
101261496	699	12041.4	26140	1.14228	0	Up	0	LOC101261496	NA	NA	NA	K11252//histone H2B	gi|460378302|ref|XP_004234912.1|//PREDICTED: histone H2B [Solanum lycopersicum]
BGI_novel_G016758	2389	316.14	5596.8	4.17	0	Up	0	NA	NA	NA	NA	K14487//auxin responsive GH3 gene family	XP_019249800.1//PREDICTED: indole-3-acetic acid-amido synthetase GH3.6 [Nicotiana attenuata]
101262260	1013	24482.5	10470.6	-1.20137	0	Down	0	LOC101262260	NA	NA	NA	NA	gi|460405912|ref|XP_004248418.1|//PREDICTED: protein CURVATURE THYLAKOID 1B, chloroplastic [Solanum lycopersicum]
BGI_novel_G010551	2824	18824.5	6959.07	-1.41161	0	Down	0	NA	GO:0016021//integral component of membrane	GO:0030246//carbohydrate binding;GO:0004674//protein serine/threonine kinase activity;GO:0005524//ATP binding	GO:0048544//recognition of pollen	K04733//interleukin-1 receptor-associated kinase 4 [EC:2.7.11.1]	XP_006356818.1//PREDICTED: G-type lectin S-receptor-like serine/threonine-protein kinase At4g27290 [Solanum tuberosum]
BGI_novel_G017779	2868	20014.7	7713.31	-1.3516	0	Down	0	NA	NA	GO:0003746//translation elongation factor activity;GO:0005525//GTP binding;GO:0003924//GTPase activity	NA	K03234//elongation factor 2	XP_016537814.1//PREDICTED: elongation factor 2-like [Capsicum annuum]
543979	988	19613.2	7497	-1.36341	0	Down	0	NP24	GO:0005737//cytoplasm	NA	GO:0050832//defense response to fungus;GO:0031640//killing of cells of other organism	K04733//interleukin-1 receptor-associated kinase 4 [EC:2.7.11.1]	gi|806776583|ref|NP_001292922.1|//protein NP24 precursor [Solanum lycopersicum]
101258105	2348	16437.2	5586.33	-1.53296	0	Down	0	LOC101258105	GO:0005737//cytoplasm	GO:0003723//RNA binding;GO:0000166//nucleotide binding	NA	K13126//polyadenylate-binding protein	gi|460369827|ref|XP_004230758.1|//PREDICTED: polyadenylate-binding protein 8-like [Solanum lycopersicum]
101266240	1500	2124.61	9750.12	2.22225	0	Up	0	LOC101266240	NA	NA	NA	NA	gi|460396904|ref|XP_004244010.1|//PREDICTED: uncharacterized protein LOC101266240 [Solanum lycopersicum]
BGI_novel_G012918	1155	1509.82	8413.95	2.50244	0	Up	0	NA	GO:0016020//membrane;GO:0005618//cell wall;GO:0005576//extracellular region	NA	GO:0009664//plant-type cell wall organization	K20628//expansin	NP_001234881.1//expansin9 precursor [Solanum lycopersicum]
101255259	2303	12684.3	26609.9	1.09296	0	Up	0	LOC101255259	NA	NA	NA	K11131//H/ACA ribonucleoprotein complex subunit 4 [EC:5.4.99.-]	gi|460373659|ref|XP_004232632.1|//PREDICTED: H/ACA ribonucleoprotein complex subunit 4 [Solanum lycopersicum]
BGI_novel_G009520	1169	457.19	5678.11	3.65858	0	Up	0	NA	GO:0005737//cytoplasm	GO:0046872//metal ion binding;GO:0046914//transition metal ion binding	GO:0030001//metal ion transport;GO:0046916//cellular transition metal ion homeostasis	K17046//protein DEK;K04733//interleukin-1 receptor-associated kinase 4 [EC:2.7.11.1]	XP_004236655.1//PREDICTED: heavy metal-associated isoprenylated plant protein 3-like [Solanum lycopersicum]
101252717	590	4112.9	13225.2	1.70909	0	Up	0	LOC101252717	GO:0005634//nucleus;GO:0009536//plastid;GO:0000786//nucleosome	GO:0003677//DNA binding;GO:0046982//protein heterodimerization activity	NA	K11253//histone H3	gi|565487241|ref|XP_006301260.1|//hypothetical protein CARUB_v10021660mg, partial [Capsella rubella]
101263826	592	6797.65	17578.3	1.39472	0	Up	0	DEFL1	NA	NA	GO:0050832//defense response to fungus;GO:0031640//killing of cells of other organism	NA	gi|460394316|ref|XP_004242750.1|//PREDICTED: defensin-like protein P322 [Solanum lycopersicum]
543794	1287	5937.44	534.23	-3.45028	0	Down	0	exp11	NA	NA	NA	K20628//expansin	gi|970025037|ref|XP_015073830.1|//PREDICTED: expansin-A11-like [Solanum pennellii]
BGI_novel_G019075	1080	2905.05	10907.9	1.93277	0	Up	0	NA	GO:0016020//membrane;GO:0005840//ribosome;GO:0009941//chloroplast envelope;GO:0022626//cytosolic ribosome;GO:0009570//chloroplast stroma	GO:0003723//RNA binding;GO:0003735//structural constituent of ribosome	GO:0000027//ribosomal large subunit assembly;GO:0009735//response to cytokinin;GO:0006412//translation	K02931//large subunit ribosomal protein L5	XP_004246669.1//PREDICTED: 50S ribosomal protein L5, chloroplastic [Solanum lycopersicum]
101265977	991	10916.2	2793.58	-1.94226	0	Down	0	LOC101265977	NA	NA	NA	K00588//caffeoyl-CoA O-methyltransferase [EC:2.1.1.104]	gi|460372071|ref|XP_004231857.1|//PREDICTED: caffeoyl-CoA O-methyltransferase-like [Solanum lycopersicum]
101260301	1452	1542.96	8077.66	2.41227	0	Up	0	LOC101260301	NA	NA	NA	NA	gi|460375418|ref|XP_004233503.1|//PREDICTED: uncharacterized protein LOC101260301 [Solanum lycopersicum]
BGI_novel_G022329	1338	19424	7811.33	-1.29016	0	Down	0	NA	NA	NA	NA	K12382//saposin;K15285//solute carrier family 35, member E3	XP_004249679.1//PREDICTED: protein LURP-one-related 10 [Solanum lycopersicum]
544068	1552	15133.7	5200.62	-1.51697	0	Down	0	PGH1	GO:0000015//phosphopyruvate hydratase complex	GO:0000287//magnesium ion binding;GO:0004634//phosphopyruvate hydratase activity	GO:0006096//glycolytic process	K01689//enolase [EC:4.2.1.11]	gi|350538295|ref|NP_001234080.1|//enolase [Solanum lycopersicum]
101251468	1472	3787.7	12325.8	1.72632	0	Up	0	LOC101251468	NA	NA	NA	NA	gi|460384403|ref|XP_004237901.1|//PREDICTED: uncharacterized protein LOC101251468 [Solanum lycopersicum]
BGI_novel_G011285	833	7359.57	18140.6	1.32556	0	Up	0	NA	GO:0005737//cytoplasm	GO:0047134//protein-disulfide reductase activity;GO:0015035//protein disulfide oxidoreductase activity;GO:0016671//oxidoreductase activity, acting on a sulfur group of donors, disulfide as acceptor;GO:0004791//thioredoxin-disulfide reductase activity	GO:0006662//glycerol ether metabolic process;GO:0034599//cellular response to oxidative stress;GO:0045454//cell redox homeostasis	K03671//thioredoxin 1	XP_004238750.1//PREDICTED: thioredoxin H2-like [Solanum lycopersicum]
101265653	1734	6878.95	981.1	-2.78568	0	Down	0	LOC101265653	NA	NA	NA	K10255//acyl-lipid omega-6 desaturase (Delta-12 desaturase) [EC:1.14.19.23 1.14.19.45]	gi|460393982|ref|XP_004242585.1|//PREDICTED: omega-6 fatty acid desaturase, chloroplastic [Solanum lycopersicum]
BGI_novel_G004963	1509	461.33	5360.02	3.5624	0	Up	0	NA	NA	GO:0016787//hydrolase activity	NA	K14641//apyrase [EC:3.6.1.5]	XP_010316510.1//PREDICTED: apyrase isoform X2 [Solanum lycopersicum]
100316879	2473	23732.5	10819	-1.10927	0	Down	0	LOC100316879	GO:0005634//nucleus;GO:0005886//plasma membrane;GO:0005737//cytoplasm	GO:0005524//ATP binding;GO:0004683//calmodulin-dependent protein kinase activity;GO:0005509//calcium ion binding;GO:0009931//calcium-dependent protein serine/threonine kinase activity;GO:0005516//calmodulin binding	GO:0009738//abscisic acid-activated signaling pathway;GO:0018105//peptidyl-serine phosphorylation;GO:0035556//intracellular signal transduction;GO:0046777//protein autophosphorylation	K13412//calcium-dependent protein kinase [EC:2.7.11.1]	gi|723679868|ref|XP_010317648.1|//PREDICTED: calcium-dependent protein kinase isoform X1 [Solanum lycopersicum]
BGI_novel_G020809	1209	2644.14	10071.4	1.95342	0	Up	0	NA	GO:0005737//cytoplasm	GO:0005506//iron ion binding;GO:0050113//inositol oxygenase activity	GO:0019310//inositol catabolic process	K00469//inositol oxygenase [EC:1.13.99.1]	XP_009616364.1//PREDICTED: inositol oxygenase 2-like [Nicotiana tomentosiformis]
BGI_novel_G005429	1676	25144.1	11783.6	-1.06941	0	Down	0	NA	GO:0005739//mitochondrion	GO:0016616//oxidoreductase activity, acting on the CH-OH group of donors, NAD or NADP as acceptor;GO:0051287//NAD binding;GO:0008863//formate dehydrogenase (NAD+) activity	GO:0042183//formate catabolic process	K00122//formate dehydrogenase [EC:1.17.1.9]	NP_001234857.1//formate dehydrogenase [Solanum lycopersicum]
101258266	1071	4420.31	13198	1.60214	0	Up	0	LOC101258266	NA	NA	NA	K14424//methylsterol monooxygenase 2	gi|460389474|ref|XP_004240377.1|//PREDICTED: methylsterol monooxygenase 2-2-like [Solanum lycopersicum]
101255712	1138	9753	2458	-1.96433	0	Down	0	LOC101255712	NA	NA	NA	K03006//DNA-directed RNA polymerase II subunit RPB1 [EC:2.7.7.6]	gi|460395318|ref|XP_004243231.1|//PREDICTED: protodermal factor 1 [Solanum lycopersicum]
BGI_novel_G006279	887	3382.45	11173.6	1.74799	0	Up	0	NA	NA	NA	NA	K08912//light-harvesting complex II chlorophyll a/b binding protein 1	XP_013635658.1//PREDICTED: chlorophyll a-b binding protein 1, chloroplastic-like [Brassica oleracea var. oleracea]
BGI_novel_G022818	1221	6016.47	15545.4	1.39353	0	Up	0	NA	NA	GO:0019904//protein domain specific binding	NA	K06630//14-3-3 protein epsilon	XP_020237739.1//14-3-3-like protein isoform X2 [Cajanus cajan]
101260928	1443	10179.9	2699.09	-1.89114	0	Down	0	LOC101260928	NA	NA	NA	K00480//salicylate hydroxylase [EC:1.14.13.1];K09838//zeaxanthin epoxidase [EC:1.14.15.21]	gi|460383070|ref|XP_004237255.1|//PREDICTED: zeaxanthin epoxidase, chloroplastic [Solanum lycopersicum]
101248759	1732	14441.7	5122.98	-1.47115	0	Down	0	LOC101248759	NA	NA	NA	NA	gi|460380080|ref|XP_004235786.1|//PREDICTED: uncharacterized protein LOC101248759 [Solanum lycopersicum]
BGI_novel_G018569	2706	21527.9	9627.45	-1.13695	0	Down	0	NA	GO:0016020//membrane;GO:0016021//integral component of membrane	GO:0016709//oxidoreductase activity, acting on paired donors, with incorporation or reduction of molecular oxygen, NAD(P)H as one donor, and incorporation of one atom of oxygen;GO:0016705//oxidoreductase activity, acting on paired donors, with incorporation or reduction of molecular oxygen;GO:0020037//heme binding;GO:0005506//iron ion binding;GO:0004497//monooxygenase activity	GO:0044550//secondary metabolite biosynthetic process	K14985//26-hydroxylase [EC:1.14.-.-];K00512//steroid 17alpha-monooxygenase / 17alpha-hydroxyprogesterone deacetylase [EC:1.14.14.19 1.14.14.32]	XP_004245718.1//PREDICTED: ferruginol synthase-like [Solanum lycopersicum]
BGI_novel_G004778	2334	6801	1096	-2.60947	0	Down	0	NA	GO:0016021//integral component of membrane	GO:0004674//protein serine/threonine kinase activity;GO:0005524//ATP binding	NA	K04733//interleukin-1 receptor-associated kinase 4 [EC:2.7.11.1]	XP_015063796.1//PREDICTED: putative receptor-like protein kinase At4g00960 [Solanum pennellii]
101261198	1556	10080.1	2675.69	-1.88949	0	Down	0	LOC101261198	NA	NA	NA	K03006//DNA-directed RNA polymerase II subunit RPB1 [EC:2.7.7.6]	gi|460412857|ref|XP_004251814.1|//PREDICTED: protodermal factor 1-like [Solanum lycopersicum]
BGI_novel_G013201	1124	8971.01	19905.3	1.17384	0	Up	0	NA	GO:0005737//cytoplasm	GO:0003746//translation elongation factor activity;GO:0005525//GTP binding;GO:0003924//GTPase activity	NA	K03231//elongation factor 1-alpha	XP_015079096.1//PREDICTED: elongation factor 1-alpha-like [Solanum pennellii]
101268888	1214	21083.9	9430	-1.13678	0	Down	0	LOC101268888	NA	NA	NA	K04733//interleukin-1 receptor-associated kinase 4 [EC:2.7.11.1]	gi|723718851|ref|XP_004244275.2|//PREDICTED: epidermis-specific secreted glycoprotein EP1-like [Solanum lycopersicum]
BGI_novel_G019103	1632	728.68	5670.18	2.98407	0	Up	0	NA	GO:0005737//cytoplasm	GO:0045548//phenylalanine ammonia-lyase activity	GO:0009800//cinnamic acid biosynthetic process;GO:0006559//L-phenylalanine catabolic process	K10775//phenylalanine ammonia-lyase [EC:4.3.1.24]	XP_004246652.1//PREDICTED: phenylalanine ammonia-lyase-like [Solanum lycopersicum]
101250690	1262	5401.83	7.49	-9.47023	0	Down	0	EO	GO:0048046//apoplast;GO:0009941//chloroplast envelope;GO:0009579//thylakoid;GO:0010319//stromule;GO:0009570//chloroplast stroma	GO:0008270//zinc ion binding;GO:0035798//2-alkenal reductase (NADP+) activity;GO:0035671//enone reductase activity	GO:0055114//oxidation-reduction process	K18980//2-methylene-furan-3-one reductase [EC:1.3.1.105]	gi|823630988|ref|NP_001296292.1|//2-methylene-furan-3-one reductase [Solanum lycopersicum]
BGI_novel_G002249	887	2595.99	9512.55	1.89758	0	Up	0	NA	GO:0005829//cytosol	GO:0000287//magnesium ion binding;GO:0042802//identical protein binding;GO:0004170//dUTP diphosphatase activity	GO:0046081//dUTP catabolic process;GO:0006281//DNA repair;GO:0006226//dUMP biosynthetic process;GO:0046080//dUTP metabolic process	K01520//dUTP pyrophosphatase [EC:3.6.1.23]	XP_015065379.1//PREDICTED: deoxyuridine 5'-triphosphate nucleotidohydrolase [Solanum pennellii]
101265548	1908	8060.26	1757.38	-2.17337	0	Down	0	LOC101265548	NA	NA	NA	K12261//2-hydroxyacyl-CoA lyase 1 [EC:4.1.-.-];K01904//4-coumarate--CoA ligase [EC:6.2.1.12];K18660//malonyl-CoA/methylmalonyl-CoA synthetase [EC:6.2.1.-]	gi|460390213|ref|XP_004240733.1|//PREDICTED: oxalate--CoA ligase-like isoform X1 [Solanum lycopersicum]
101251145	1276	1099.94	6446.26	2.57507	0	Up	0	Rcr3	GO:0005615//extracellular space;GO:0005764//lysosome	GO:0004197//cysteine-type endopeptidase activity	GO:0051603//proteolysis involved in cellular protein catabolic process	K13441//cysteine protease;K01365//cathepsin L [EC:3.4.22.15]	gi|998429217|ref|NP_001307244.1|//cysteine protease precursor [Solanum lycopersicum]
BGI_novel_G008153	965	5465.5	14285.9	1.4102	0	Up	0	NA	GO:0046658//anchored component of plasma membrane	GO:0004553//hydrolase activity, hydrolyzing O-glycosyl compounds;GO:0030247//polysaccharide binding	NA	K03006//DNA-directed RNA polymerase II subunit RPB1 [EC:2.7.7.6];K19891//glucan endo-1,3-beta-glucosidase 1/2/3 [EC:3.2.1.39]	NP_001333365.1//beta-1,3-glucanase family protein precursor [Solanum lycopersicum]
101259661	2530	7670.4	1606	-2.2318	0	Down	0	LOC101259661	NA	NA	NA	NA	gi|460401712|ref|XP_004246361.1|//PREDICTED: uncharacterized protein At1g04910-like [Solanum lycopersicum]
101268078	1928	16789.5	6915.68	-1.25559	0	Down	0	LOC101268078	GO:0016021//integral component of membrane	GO:0015098//molybdate ion transmembrane transporter activity	GO:0015689//molybdate ion transport	NA	gi|723682364|ref|XP_010318046.1|//PREDICTED: molybdate-anion transporter [Solanum lycopersicum]
101247665	725	8641.94	18868.2	1.15056	0	Up	0	LOC101247665	GO:0005634//nucleus;GO:0000786//nucleosome	GO:0003677//DNA binding;GO:0046982//protein heterodimerization activity	NA	K11251//histone H2A	gi|460405812|ref|XP_004248368.1|//PREDICTED: probable histone H2A.1 [Solanum lycopersicum]
101263049	1182	21114.1	9819.42	-1.08047	0	Down	0	LOC101263049	NA	NA	NA	K03768//peptidyl-prolyl cis-trans isomerase B (cyclophilin B) [EC:5.2.1.8]	gi|460365069|ref|XP_004228428.1|//PREDICTED: peptidyl-prolyl cis-trans isomerase CYP20-2, chloroplastic [Solanum lycopersicum]
778281	1060	8850.22	19111	1.13465	0	Up	0	H1	GO:0005634//nucleus;GO:0000786//nucleosome	GO:0003677//DNA binding	GO:0006334//nucleosome assembly	K11275//histone H1/5	gi|350536329|ref|NP_001233985.1|//histone H1 [Solanum lycopersicum]
BGI_novel_G018070	954	4382.93	315.91	-3.77028	0	Down	0	NA	GO:0009507//chloroplast	GO:0050366//tyramine N-feruloyltransferase activity;GO:0008080//N-acetyltransferase activity	GO:0006591//ornithine metabolic process	K22246//tyramine N-feruloyltransferase [EC:2.3.1.110]	XP_004245284.1//PREDICTED: tyramine N-feruloyltransferase 4/11-like [Solanum lycopersicum]
BGI_novel_G005441	2200	21543.4	10151.6	-1.06151	0	Down	0	NA	NA	GO:0016491//oxidoreductase activity	NA	K00128//aldehyde dehydrogenase (NAD+) [EC:1.2.1.3]	XP_010316283.1//PREDICTED: aldehyde dehydrogenase family 2 member B7, mitochondrial [Solanum lycopersicum]
101253257	1067	730	5353	2.89841	0	Up	0	LOC101253257	NA	NA	NA	K09286//EREBP-like factor	gi|460412633|ref|XP_004251702.1|//PREDICTED: ethylene-responsive transcription factor ERF017 [Solanum lycopersicum]
BGI_novel_G014840	1822	2476.91	8943.24	1.87629	0	Up	0	NA	GO:0005634//nucleus;GO:0043626//PCNA complex	GO:0003677//DNA binding;GO:0030337//DNA polymerase processivity factor activity	GO:0006272//leading strand elongation;GO:0019985//translesion synthesis;GO:0006298//mismatch repair;GO:0006260//DNA replication;GO:0006275//regulation of DNA replication	K04802//proliferating cell nuclear antigen	NP_001234844.1//proliferating cell nuclear antigen [Solanum lycopersicum]
101260642	511	1389.35	6808.8	2.31702	0	Up	0	LOC101260642	GO:0009506//plasmodesma;GO:0009579//thylakoid;GO:0005774//vacuolar membrane;GO:0005730//nucleolus;GO:0005829//cytosol;GO:0005886//plasma membrane;GO:0000786//nucleosome;GO:0009507//chloroplast	GO:0003677//DNA binding;GO:0046982//protein heterodimerization activity	GO:0006334//nucleosome assembly	K11254//histone H4	gi|195617694|gb|ACG30677.1|//histone H4 [Zea mays]
101262139	1804	1511.86	7022.61	2.23972	0	Up	0	LOC101262139	NA	NA	NA	K14411//RNA-binding protein Musashi	gi|460399853|ref|XP_004245451.1|//PREDICTED: protein IQ-DOMAIN 1-like [Solanum lycopersicum]
101249417	1400	13230.2	4835.23	-1.42815	0	Down	0	LOC101249417	NA	NA	NA	K19269//phosphoglycolate phosphatase [EC:3.1.3.18 3.1.3.48]	gi|460409293|ref|XP_004250073.1|//PREDICTED: phosphoglycolate phosphatase 1B, chloroplastic [Solanum lycopersicum]
100147723	1531	3395.62	10488.1	1.65103	0	Up	0	GAD3	NA	GO:0004351//glutamate decarboxylase activity;GO:0030170//pyridoxal phosphate binding	GO:0006536//glutamate metabolic process	K01580//glutamate decarboxylase [EC:4.1.1.15]	gi|350538351|ref|NP_001233827.1|//glutamate decarboxylase isoform3 [Solanum lycopersicum]
BGI_novel_G000065	828	14653.6	5738.28	-1.32854	0	Down	0	NA	GO:0016021//integral component of membrane	NA	NA	NA	XP_004228721.1//PREDICTED: protein PLANT CADMIUM RESISTANCE 2 [Solanum lycopersicum]
101246375	4920	7675.2	1765.92	-2.09575	0	Down	0	LOC101246375	NA	NA	NA	K05666//ATP-binding cassette, subfamily C (CFTR/MRP), member 2	gi|460367254|ref|XP_004229490.1|//PREDICTED: ABC transporter C family member 14-like [Solanum lycopersicum]
101247008	895	1524.32	6986.83	2.22051	0	Up	0	LOC101247008	NA	NA	NA	K11296//high mobility group protein B3	gi|460382285|ref|XP_004236870.1|//PREDICTED: high mobility group B protein 7 [Solanum lycopersicum]
101265829	1634	10464.9	3262.53	-1.65746	0	Down	0	LOC101265829	GO:0005874//microtubule;GO:0005737//cytoplasm	GO:0005525//GTP binding;GO:0005200//structural constituent of cytoskeleton;GO:0003924//GTPase activity	GO:0007017//microtubule-based process	K07375//tubulin beta	gi|460390215|ref|XP_004240734.1|//PREDICTED: tubulin beta-1 chain [Solanum lycopersicum]
BGI_novel_G007504	3339	7650.27	1785.96	-2.07478	0	Down	0	NA	GO:0016021//integral component of membrane	GO:0016760//cellulose synthase (UDP-forming) activity	GO:0030244//cellulose biosynthetic process;GO:0071555//cell wall organization	K20924//cellulose synthase-like protein [EC:2.4.1.-]	XP_004235281.1//PREDICTED: cellulose synthase-like protein D3 [Solanum lycopersicum]
101266770	1248	7868.32	1899.96	-2.02605	0	Down	0	LOC101266770	GO:0005618//cell wall;GO:0005576//extracellular region;GO:0005773//vacuole	GO:0008061//chitin binding;GO:0004568//chitinase activity	GO:0006032//chitin catabolic process;GO:0016998//cell wall macromolecule catabolic process;GO:0006952//defense response;GO:0000272//polysaccharide catabolic process	K20547//basic endochitinase B [EC:3.2.1.14];K01183//chitinase [EC:3.2.1.14]	gi|460406364|ref|XP_004248635.1|//PREDICTED: endochitinase 3-like [Solanum lycopersicum]
101263714	1466	2050.6	7962.61	1.98123	0	Up	0	LOC101263714	NA	NA	NA	K07213//copper chaperone	gi|460391678|ref|XP_004241446.1|//PREDICTED: enolase-phosphatase E1-like isoform X2 [Solanum lycopersicum]
101259671	3454	4475.27	12144.2	1.46426	0	Up	0	LOC101259671	NA	GO:0003676//nucleic acid binding	NA	K11593//eukaryotic translation initiation factor 2C	gi|460404284|ref|XP_004247613.1|//PREDICTED: protein argonaute 10 [Solanum lycopersicum]
100527968	2757	3481.3	10500.5	1.6168	0	Up	0	PIN4	GO:0005783//endoplasmic reticulum;GO:0016021//integral component of membrane;GO:0005886//plasma membrane	GO:0010329//auxin efflux transmembrane transporter activity	GO:0010315//auxin efflux;GO:0055085//transmembrane transport;GO:0009926//auxin polar transport;GO:0010252//auxin homeostasis	K13947//auxin efflux carrier family	gi|350535242|ref|NP_001234184.1|//auxin efflux facilitator SlPIN4 [Solanum lycopersicum]
101254314	2888	10240.2	3191.11	-1.65809	0	Down	0	LOC101254314	NA	NA	NA	NA	gi|460396299|ref|XP_004243713.1|//PREDICTED: uncharacterized protein At1g04910 isoform X1 [Solanum lycopersicum]
BGI_novel_G024521	613	0	10944.9	14.442	0	Up	0	NA	NA	NA	NA	K11855//ubiquitin carboxyl-terminal hydrolase 36/42 [EC:3.4.19.12]	XP_015061336.1//PREDICTED: 36.4 kDa proline-rich protein [Solanum pennellii]
109119846	790	4421.76	427.7	-3.34592	0	Down	0	LOC109119846	NA	NA	NA	NA	gi|970017473|ref|XP_015069874.1|//PREDICTED: proteinase inhibitor type-2-like [Solanum pennellii]
BGI_novel_G024537	866	7547.48	16709.7	1.17065	0	Up	0	NA	NA	NA	NA	K11323//histone arginine demethylase JMJD6 [EC:1.14.11.-]	XP_004251738.1//PREDICTED: phosphopantothenoylcysteine decarboxylase subunit VHS3-like [Solanum lycopersicum]
BGI_novel_G016913	988	831.16	5313.75	2.70057	0	Up	0	NA	NA	GO:0016874//ligase activity	NA	K17046//protein DEK	XP_004244042.1//PREDICTED: protein DEK [Solanum lycopersicum]
101268556	689	195.28	3653.43	4.24967	0	Up	0	LOC101268556	GO:0005634//nucleus;GO:0000786//nucleosome	GO:0003677//DNA binding;GO:0046982//protein heterodimerization activity	NA	K11253//histone H3	gi|460414483|ref|XP_004252600.1|//PREDICTED: histone H3.2-like [Solanum lycopersicum]
BGI_novel_G024629	1667	11694.4	4124.72	-1.47941	0	Down	0	NA	NA	NA	NA	K05605//3-hydroxyisobutyryl-CoA hydrolase [EC:3.1.2.4]	XP_015880068.1//PREDICTED: 3-hydroxyisobutyryl-CoA hydrolase-like protein 5 [Ziziphus jujuba]
BGI_novel_G015814	10230	4580.49	519.93	-3.11508	0	Down	0	NA	NA	GO:0016301//kinase activity	NA	K06685//MOB kinase activator 1	XP_019070394.1//PREDICTED: MOB kinase activator-like 1A isoform X1 [Solanum lycopersicum]
101257678	3193	3539.52	168.33	-4.37016	0	Down	0	LOC101257678	NA	NA	NA	NA	gi|460394741|ref|XP_004242953.1|//PREDICTED: protein WEAK CHLOROPLAST MOVEMENT UNDER BLUE LIGHT 1 [Solanum lycopersicum]
101244607	1226	7103.04	15810.9	1.17845	0	Up	0	LOC101244607	GO:0005730//nucleolus	GO:0046872//metal ion binding;GO:0016787//hydrolase activity	GO:0006355//regulation of transcription, DNA-templated	K11276//nucleophosmin 1	gi|460402128|ref|XP_004246566.1|//PREDICTED: histone deacetylase HDT1 [Solanum lycopersicum]
BGI_novel_G006132	1779	15472.5	6633.63	-1.19781	0	Down	0	NA	GO:0016021//integral component of membrane	NA	NA	K14209//solute carrier family 36 (proton-coupled amino acid transporter);K15015//solute carrier family 32 (vesicular inhibitory amino acid transporter)	XP_011098833.1//lysine histidine transporter 1 [Sesamum indicum]
101259360	3221	6625.75	1455.99	-2.16205	0	Down	0	LOC101259360	NA	NA	NA	K04733//interleukin-1 receptor-associated kinase 4 [EC:2.7.11.1]	gi|460401545|ref|XP_004246282.1|//PREDICTED: receptor-like protein kinase FERONIA [Solanum lycopersicum]
543895	2164	5890.77	1120.74	-2.36997	0	Down	0	LOC543895	NA	NA	NA	K10529//alpha-dioxygenase [EC:1.-.-.-]	gi|930425278|ref|NP_001234410.2|//alpha-DOX1 [Solanum lycopersicum]
101268555	1600	824.38	5088.2	2.64981	0	Up	0	LOC101268555	NA	GO:0004553//hydrolase activity, hydrolyzing O-glycosyl compounds	GO:0005975//carbohydrate metabolic process	K19891//glucan endo-1,3-beta-glucosidase 1/2/3 [EC:3.2.1.39]	gi|460377750|ref|XP_004234651.1|//PREDICTED: glucan endo-1,3-beta-glucosidase 12 [Solanum lycopersicum]
BGI_novel_G017939	985	1962.65	7390.59	1.93692	0	Up	0	NA	NA	GO:0046872//metal ion binding	NA	K14651//transcription initiation factor TFIID subunit 15;K15407//queuine tRNA-ribosyltransferase subunit QTRTD1 [EC:2.4.2.29]	XP_004245200.1//PREDICTED: TATA-binding protein-associated factor 2N isoform X1 [Solanum lycopersicum]
BGI_novel_G022004	1751	6567.09	14853.7	1.20153	0	Up	0	NA	GO:0005874//microtubule;GO:0005737//cytoplasm	GO:0005200//structural constituent of cytoskeleton;GO:0005525//GTP binding;GO:0003924//GTPase activity	GO:0007017//microtubule-based process	K07375//tubulin beta	PAN31263.1//hypothetical protein PAHAL_E03292 [Panicum hallii]
101252594	917	2112.18	7638.23	1.87854	0	Up	0	LOC101252594	GO:0015934//large ribosomal subunit	GO:0003723//RNA binding;GO:0003735//structural constituent of ribosome	GO:0006412//translation	K02865//large subunit ribosomal protein L10Ae	gi|460391427|ref|XP_004241322.1|//PREDICTED: 60S ribosomal protein L10a-1-like [Solanum lycopersicum]
101245495	949	699.42	4741.02	2.785	0	Up	0	LOC101245495	NA	NA	NA	K11275//histone H1/5	gi|460404357|ref|XP_004247649.1|//PREDICTED: histone H1-like [Solanum lycopersicum]
101267639	964	8651.13	17807.9	1.06559	0	Up	0	LOC101267639	NA	NA	NA	K00850//6-phosphofructokinase 1 [EC:2.7.1.11];K19748//RAB6-interacting golgin	gi|460402114|ref|XP_004246559.1|//PREDICTED: uncharacterized protein LOC101267639 [Solanum lycopersicum]
101268754	863	7200.59	15716.7	1.15014	0	Up	0	LOC101268754	NA	NA	NA	K11275//histone H1/5	gi|460382434|ref|XP_004236944.1|//PREDICTED: HMG-Y-related protein A [Solanum lycopersicum]
BGI_novel_G011568	1579	12148.4	4630	-1.36765	0	Down	0	NA	NA	NA	NA	K14431//transcription factor TGA	XP_004238950.1//PREDICTED: uncharacterized protein LOC101261228 [Solanum lycopersicum]
101245158	1102	10333.6	3536.33	-1.52298	0	Down	0	LOC101245158	NA	NA	NA	NA	gi|460385031|ref|XP_004238209.1|//PREDICTED: uncharacterized protein LOC101245158 isoform X1 [Solanum lycopersicum]
BGI_novel_G000677	2686	8106.51	2301.25	-1.79263	0	Down	0	NA	NA	NA	NA	K13862//solute carrier family 4 (sodium borate transporter), member 11;K06573//solute carrier family 4 (anion exchanger), member 1	XP_017975548.1//PREDICTED: probable boron transporter 2 isoform X1 [Theobroma cacao]
BGI_novel_G019228	996	2877.87	8912.07	1.65479	0	Up	0	NA	NA	NA	NA	K19748//RAB6-interacting golgin	XP_004246559.1//PREDICTED: uncharacterized protein LOC101267639 [Solanum lycopersicum]
101260128	1178	1607.63	6593.38	2.06012	0	Up	0	LOC101260128	NA	NA	NA	NA	gi|460383361|ref|XP_004237394.1|//PREDICTED: uncharacterized protein LOC101260128 [Solanum lycopersicum]
BGI_novel_G004743	3136	10595.1	3736.35	-1.47966	0	Down	0	NA	GO:0016021//integral component of membrane;GO:0005886//plasma membrane	GO:0004674//protein serine/threonine kinase activity;GO:0005524//ATP binding	GO:0006468//protein phosphorylation;GO:0048544//recognition of pollen	K04733//interleukin-1 receptor-associated kinase 4 [EC:2.7.11.1]	XP_019067884.1//PREDICTED: G-type lectin S-receptor-like serine/threonine-protein kinase B120 [Solanum lycopersicum]
543986	1205	5904.52	13566.6	1.2242	0	Up	0	LOC543986	GO:0005615//extracellular space	GO:0042973//glucan endo-1,3-beta-D-glucosidase activity	GO:0006952//defense response;GO:0005975//carbohydrate metabolic process	K19891//glucan endo-1,3-beta-glucosidase 1/2/3 [EC:3.2.1.39]	gi|806638834|ref|NP_001234798.2|//glucan endo-1,3-beta-glucosidase A precursor [Solanum lycopersicum]
BGI_novel_G018066	1759	6959.17	1766.22	-1.95422	0	Down	0	NA	NA	GO:0016831//carboxy-lyase activity;GO:0030170//pyridoxal phosphate binding	GO:0019752//carboxylic acid metabolic process	K01590//histidine decarboxylase [EC:4.1.1.22]	NP_001233845.1//aromatic amino acid decarboxylase 1A [Solanum lycopersicum]
BGI_novel_G002958	1636	1418.65	6114.86	2.13183	0	Up	0	NA	GO:0005634//nucleus	NA	NA	K14505//cyclin D3, plant	NP_001234753.1//D-type cyclin-2 [Solanum lycopersicum]
101265701	1077	8312.21	2514.43	-1.70097	0	Down	0	LOC101265701	NA	NA	NA	K14492//two-component response regulator ARR-A family	gi|460374439|ref|XP_004233018.1|//PREDICTED: two-component response regulator ARR9-like [Solanum lycopersicum]
BGI_novel_G025397	1258	3078.26	9057.07	1.58096	0	Up	0	NA	GO:0005634//nucleus	GO:0003676//nucleic acid binding	NA	NA	XP_019066974.1//PREDICTED: zinc finger protein ZAT10-like [Solanum lycopersicum]
544171	2186	8407.79	2573.24	-1.68411	0	Down	0	DGK1	NA	NA	NA	K00901//diacylglycerol kinase (ATP) [EC:2.7.1.107]	gi|952977759|ref|NP_001234476.2|//calmodulin-binding diacylglycerol kinase isoform 1 [Solanum lycopersicum]
101249694	1528	8571.53	2666.27	-1.6607	0	Down	0	LOC101249694	NA	NA	NA	K16815//calcium-independent phospholipase A2-gamma	gi|460372466|ref|XP_004232051.1|//PREDICTED: patatin-like protein 3 [Solanum lycopersicum]
BGI_novel_G005535	4212	243.36	3368.03	3.81477	0	Up	0	NA	GO:0005634//nucleus;GO:0005694//chromosome	GO:0005524//ATP binding	GO:0051276//chromosome organization	K06675//structural maintenance of chromosome 4	XP_009608449.1//PREDICTED: structural maintenance of chromosomes protein 4 [Nicotiana tomentosiformis]
BGI_novel_G020174	5313	17862.1	8629.14	-1.02558	0	Down	0	NA	GO:0016021//integral component of membrane	GO:0005524//ATP binding;GO:0042626//ATPase activity, coupled to transmembrane movement of substances	NA	K05666//ATP-binding cassette, subfamily C (CFTR/MRP), member 2	XP_016556186.1//PREDICTED: ABC transporter C family member 14 [Capsicum annuum]
104644917	226	4549	11357	1.34399	0	Up	0	LOC104644917	NA	NA	NA	NA	gi|723749502|ref|XP_010314083.1|//PREDICTED: LOW QUALITY PROTEIN: uncharacterized protein LOC104644917 [Solanum lycopersicum]
101253283	716	1591.18	6350.68	2.02085	0	Up	0	LOC101253283	NA	NA	NA	K03671//thioredoxin 1	gi|460386135|ref|XP_004238755.1|//PREDICTED: thioredoxin H4 [Solanum lycopersicum]
BGI_novel_G004385	1396	4651.71	725.44	-2.6568	0	Down	0	NA	GO:0016021//integral component of membrane	GO:0016788//hydrolase activity, acting on ester bonds	NA	K10691//E3 ubiquitin-protein ligase UBR4 [EC:2.3.2.27];K17604//zinc finger SWIM domain-containing protein 3;K01188//beta-glucosidase [EC:3.2.1.21];K14209//solute carrier family 36 (proton-coupled amino acid transporter);K00679//phospholipid:diacylglycerol acyltransferase [EC:2.3.1.158]	XP_004233007.1//PREDICTED: GDSL esterase/lipase At1g29670-like [Solanum lycopersicum]
104649482	4239	3687.13	350.95	-3.36913	0	Down	0	LOC104649482	NA	NA	NA	K04733//interleukin-1 receptor-associated kinase 4 [EC:2.7.11.1]	gi|723734582|ref|XP_010327142.1|//PREDICTED: receptor-like protein kinase THESEUS 1 [Solanum lycopersicum]
101246670	2186	6412.83	1554.86	-2.02014	0	Down	0	LOC101246670	NA	NA	NA	K05681//ATP-binding cassette, subfamily G (WHITE), member 2	gi|460369402|ref|XP_004230551.1|//PREDICTED: ABC transporter G family member 11-like [Solanum lycopersicum]
BGI_novel_G020649	1097	15433.7	7024.42	-1.1116	0	Down	0	NA	GO:0048046//apoplast;GO:0005618//cell wall	GO:0016762//xyloglucan:xyloglucosyl transferase activity;GO:0004553//hydrolase activity, hydrolyzing O-glycosyl compounds	GO:0010411//xyloglucan metabolic process;GO:0042546//cell wall biogenesis;GO:0071555//cell wall organization	K08235//xyloglucan:xyloglucosyl transferase [EC:2.4.1.207]	NP_001296797.1//brassinosteroid-regulated protein BRU1 precursor [Solanum lycopersicum]
101251772	2605	1124.45	5391.59	2.28552	0	Up	0	LeANT	GO:0005634//nucleus	GO:0003677//DNA binding;GO:0003700//DNA binding transcription factor activity	GO:0006355//regulation of transcription, DNA-templated;GO:0007275//multicellular organism development	K09285//AP2-like factor, ANT lineage	gi|665821169|ref|NP_001287930.1|//AP2-like ethylene-responsive transcription factor ANT-like [Solanum lycopersicum]
BGI_novel_G015072	823	2123	7299.56	1.80574	0	Up	0	NA	GO:0005634//nucleus;GO:0000786//nucleosome	GO:0003677//DNA binding;GO:0046982//protein heterodimerization activity	NA	K11251//histone H2A	XP_004242347.1//PREDICTED: probable histone H2A variant 1 [Solanum lycopersicum]
BGI_novel_G024458	3012	9625.39	3350.2	-1.49856	0	Down	0	NA	GO:0005737//cytoplasm	GO:0004674//protein serine/threonine kinase activity;GO:0005524//ATP binding	GO:0023014//signal transduction by protein phosphorylation;GO:0007346//regulation of mitotic cell cycle;GO:0032147//activation of protein kinase activity;GO:0031098//stress-activated protein kinase signaling cascade	K20603//mitogen-activated protein kinase kinase 2 [EC:2.7.12.2]	NP_001304158.1//MAP kinase kinase [Solanum lycopersicum]
BGI_novel_G014690	614	7141.25	15128.9	1.10709	0	Up	0	NA	GO:0005634//nucleus;GO:0000786//nucleosome	GO:0003677//DNA binding;GO:0046982//protein heterodimerization activity	NA	K11252//histone H2B	XP_010322415.1//PREDICTED: histone H2B.1-like [Solanum lycopersicum]
100529106	1082	8923.25	2943.84	-1.57584	0	Down	0	LOC100529106	GO:0005887//integral component of plasma membrane;GO:0009506//plasmodesma;GO:0005773//vacuole	GO:0015250//water channel activity;GO:0015254//glycerol channel activity	GO:0006833//water transport;GO:0034220//ion transmembrane transport;GO:0009992//cellular water homeostasis;GO:0015793//glycerol transport	K09872//aquaporin PIP	gi|350539001|ref|NP_001234625.1|//aquaporin [Solanum lycopersicum]
101247018	3311	12696.8	5257.53	-1.24797	0	Down	0	LOC101247018	NA	GO:0003779//actin binding;GO:0016301//kinase activity;GO:0008138//protein tyrosine/serine/threonine phosphatase activity;GO:0004725//protein tyrosine phosphatase activity	GO:0016310//phosphorylation;GO:0035335//peptidyl-tyrosine dephosphorylation	K14165//atypical dual specificity phosphatase [EC:3.1.3.16 3.1.3.48];K21278//dual specificity protein phosphatase 1 [EC:3.1.3.16 3.1.3.48]	gi|460386929|ref|XP_004239146.1|//PREDICTED: protein-tyrosine-phosphatase MKP1-like [Solanum lycopersicum]
101245574	1121	2834.38	61.9	-5.49292	0	Down	0	LOC101245574	NA	NA	NA	K02884//large subunit ribosomal protein L19	gi|460400589|ref|XP_004245816.1|//PREDICTED: 50S ribosomal protein L19-2, chloroplastic-like [Solanum lycopersicum]
BGI_novel_G016777	3587	221.13	3191.85	3.87546	0	Up	0	NA	NA	NA	NA	K17908//autophagy-related protein 18	XP_004244157.1//PREDICTED: autophagy-related protein 18f [Solanum lycopersicum]
BGI_novel_G016471	1084	9385	3236	-1.51211	0	Down	0	NA	GO:0048046//apoplast;GO:0005618//cell wall	GO:0016762//xyloglucan:xyloglucosyl transferase activity;GO:0004553//hydrolase activity, hydrolyzing O-glycosyl compounds	GO:0010411//xyloglucan metabolic process;GO:0042546//cell wall biogenesis;GO:0071555//cell wall organization	K08235//xyloglucan:xyloglucosyl transferase [EC:2.4.1.207]	NP_001234207.1//xyloglycan endo-transglycosylase precursor [Solanum lycopersicum]
101268880	942	286.04	3360.98	3.57863	0	Up	0	LOC101268880	GO:0005634//nucleus	GO:0003677//DNA binding	GO:0010026//trichome differentiation;GO:0045893//positive regulation of transcription, DNA-templated	K09422//transcription factor MYB, plant	gi|460394349|ref|XP_004242766.1|//PREDICTED: transcription factor MYB82 [Solanum lycopersicum]
101257363	2361	4832.07	11629.3	1.29109	0	Up	0	LOC101257363	NA	NA	NA	K14754//interferon-induced GTP-binding protein Mx1	gi|460384275|ref|XP_004237838.1|//PREDICTED: dynamin-related protein 4C [Solanum lycopersicum]
101266146	923	3797	426	-3.1319	0	Down	0	LOC101266146	NA	NA	NA	K04733//interleukin-1 receptor-associated kinase 4 [EC:2.7.11.1]	gi|460400217|ref|XP_004245632.1|//PREDICTED: thaumatin-like protein [Solanum lycopersicum]
101268623	1094	8626.95	2819.72	-1.58927	0	Down	0	aquaporin	GO:0005887//integral component of plasma membrane;GO:0009506//plasmodesma;GO:0005773//vacuole	GO:0015250//water channel activity;GO:0015254//glycerol channel activity	GO:0006833//water transport;GO:0009733//response to auxin;GO:0034220//ion transmembrane transport;GO:0009735//response to cytokinin;GO:0009992//cellular water homeostasis;GO:0015793//glycerol transport	K09872//aquaporin PIP	gi|927928759|ref|NP_001266257.2|//aquaporin PIP2-7-like [Solanum lycopersicum]
BGI_novel_G012482	1587	11512.4	4579.68	-1.30584	0	Down	0	NA	GO:0005737//cytoplasm	GO:0016791//phosphatase activity;GO:0042132//fructose 1,6-bisphosphate 1-phosphatase activity	GO:0005986//sucrose biosynthetic process;GO:0006002//fructose 6-phosphate metabolic process;GO:0006094//gluconeogenesis;GO:0006000//fructose metabolic process;GO:0005975//carbohydrate metabolic process;GO:0030388//fructose 1,6-bisphosphate metabolic process	K01100//sedoheptulose-bisphosphatase [EC:3.1.3.37]	NP_001234585.1//chloroplast sedoheptulose-1,7-bisphosphatase [Solanum lycopersicum]
BGI_novel_G000338	2470	927.2	4856.58	2.41302	0	Up	0	NA	NA	GO:0003723//RNA binding;GO:0046872//metal ion binding	NA	NA	XP_004228513.1//PREDICTED: zinc finger CCCH domain-containing protein 46-like isoform X2 [Solanum lycopersicum]
101263288	1695	2959.62	139.5	-4.38304	0	Down	0	LOC101263288	NA	NA	NA	K08332//vacuolar protein 8	gi|460377871|ref|XP_004234710.1|//PREDICTED: U-box domain-containing protein 4-like isoform X1 [Solanum lycopersicum]
BGI_novel_G000159	1013	3241.02	9069.15	1.50855	0	Up	0	NA	NA	NA	NA	K05747//Wiskott-Aldrich syndrome protein;K10747//DNA ligase 1 [EC:6.5.1.1 6.5.1.6 6.5.1.7];K17506//protein phosphatase 1L [EC:3.1.3.16]	KGN52120.1//hypothetical protein Csa_5G611020 [Cucumis sativus]
BGI_novel_G015915	1486	578	4001.29	2.81536	0	Up	0	NA	NA	NA	NA	K21952//CASK-interacting protein	NP_001296193.1//36.4 kDa proline-rich protein precursor [Solanum lycopersicum]
109120649	491	159	2895	4.2105	0	Up	0	LOC109120649	NA	NA	NA	NA	gi|970040909|ref|XP_015081846.1|//PREDICTED: uncharacterized protein LOC107025584 [Solanum pennellii]
BGI_novel_G006282	755	2429.96	7609.72	1.67094	0	Up	0	NA	NA	NA	NA	K08912//light-harvesting complex II chlorophyll a/b binding protein 1	P14584.1//RecName: Full=Chlorophyll a-b binding of LHCII type 1 protein; AltName: Full=Chlorophyll a-b binding of LHCII type I protein; Short=CAB; Short=LHCP
101265234	587	629.99	4076.82	2.71808	0	Up	0	LOC101265234	NA	NA	NA	K03860//phosphatidylinositol glycan, class Q;K20887//xyloglucan glycosyltransferase 4 [EC:2.4.1.-]	gi|460386048|ref|XP_004238712.1|//PREDICTED: snakin-2-like [Solanum lycopersicum]
101261141	1417	7393.32	2235.48	-1.7016	0	Down	0	LOC101261141	NA	NA	NA	K13425//WRKY transcription factor 22;K13459//disease resistance protein RPS2;K16225//probable WRKY transcription factor 52	gi|460400013|ref|XP_004245530.1|//PREDICTED: probable WRKY transcription factor 53 [Solanum lycopersicum]
BGI_novel_G002712	1185	3649.3	428.55	-3.06605	0	Down	0	NA	GO:0005576//extracellular region	GO:0046872//metal ion binding;GO:0020037//heme binding;GO:0004601//peroxidase activity	GO:0006979//response to oxidative stress;GO:0042744//hydrogen peroxide catabolic process	K00430//peroxidase [EC:1.11.1.7]	NP_001312671.1//peroxidase N1-like precursor [Nicotiana tabacum]
BGI_novel_G004381	1353	6040.27	1531.03	-1.95608	0	Down	0	NA	NA	GO:0016788//hydrolase activity, acting on ester bonds	NA	K10691//E3 ubiquitin-protein ligase UBR4 [EC:2.3.2.27];K17604//zinc finger SWIM domain-containing protein 3;K14209//solute carrier family 36 (proton-coupled amino acid transporter);K01188//beta-glucosidase [EC:3.2.1.21];K00679//phospholipid:diacylglycerol acyltransferase [EC:2.3.1.158]	XP_016554090.1//PREDICTED: GDSL esterase/lipase At1g29670-like [Capsicum annuum]
BGI_novel_G002022	1083	4852.05	950.86	-2.32726	0	Down	0	NA	GO:0005840//ribosome	NA	GO:0042254//ribosome biogenesis	K02936//large subunit ribosomal protein L7Ae	NP_001275305.1//60S ribosomal protein L7A-like protein [Solanum tuberosum]
BGI_novel_G001566	2530	666.32	4108.76	2.64845	0	Up	0	NA	GO:0016021//integral component of membrane;GO:0005886//plasma membrane	GO:0004674//protein serine/threonine kinase activity;GO:0005524//ATP binding;GO:0004672//protein kinase activity	NA	K04733//interleukin-1 receptor-associated kinase 4 [EC:2.7.11.1];K20718//LRR receptor-like serine/threonine-protein kinase ERECTA [EC:2.7.11.1]	XP_004229807.1//PREDICTED: probable LRR receptor-like serine/threonine-protein kinase At1g34110 [Solanum lycopersicum]
101247288	1813	15466.6	7414.86	-1.03663	0	Down	0	LOC101247288	NA	NA	NA	K08900//mitochondrial chaperone BCS1	gi|460375792|ref|XP_004233688.1|//PREDICTED: putative cell division cycle ATPase [Solanum lycopersicum]
101249820	1075	3351	8988	1.44744	0	Up	0	LOC101249820	NA	NA	NA	NA	gi|460385944|ref|XP_004238660.1|//PREDICTED: uncharacterized protein LOC101249820 [Solanum lycopersicum]
BGI_novel_G004685	2668	11634.8	4866.58	-1.23344	0	Down	0	NA	NA	GO:0005516//calmodulin binding	GO:0006950//response to stress	K21989//calcium permeable stress-gated cation channel	XP_004232807.1//PREDICTED: calmodulin-binding protein 60 B-like [Solanum lycopersicum]
BGI_novel_G016626	2039	15184.1	7240.83	-1.0443	0	Down	0	NA	GO:0016021//integral component of membrane	GO:0005432//calcium:sodium antiporter activity;GO:0005509//calcium ion binding	GO:0055085//transmembrane transport;GO:0055074//calcium ion homeostasis	K07300//Ca2+:H+ antiporter	XP_004244257.1//PREDICTED: uncharacterized protein LOC101263533 [Solanum lycopersicum]
BGI_novel_G009521	1168	1016.98	4810.49	2.26593	0	Up	0	NA	GO:0005737//cytoplasm	GO:0046872//metal ion binding;GO:0046914//transition metal ion binding	GO:0030001//metal ion transport;GO:0046916//cellular transition metal ion homeostasis	K17046//protein DEK;K04733//interleukin-1 receptor-associated kinase 4 [EC:2.7.11.1]	XP_004236655.1//PREDICTED: heavy metal-associated isoprenylated plant protein 3-like [Solanum lycopersicum]
101246836	2021	14017.2	6469.35	-1.09148	0	Down	0	LOC101246836	NA	NA	NA	K20769//fatty acid omega-hydroxylase [EC:1.14.-.-];K13407//fatty acid omega-hydroxylase [EC:1.14.-.-]	gi|460394196|ref|XP_004242690.1|//PREDICTED: cytochrome P450 94A1-like [Solanum lycopersicum]
101263481	2604	4212.86	701.05	-2.56318	0	Down	0	LOC101263481	GO:0005743//mitochondrial inner membrane;GO:0070469//respiratory chain	GO:0009055//electron transfer activity;GO:0046872//metal ion binding;GO:0051537//2 iron, 2 sulfur cluster binding;GO:0051539//4 iron, 4 sulfur cluster binding;GO:0008137//NADH dehydrogenase (ubiquinone) activity	GO:0042773//ATP synthesis coupled electron transport	K03934//NADH dehydrogenase (ubiquinone) Fe-S protein 1 [EC:1.6.5.3 1.6.99.3]	gi|460409554|ref|XP_004250203.1|//PREDICTED: NADH dehydrogenase [ubiquinone] iron-sulfur protein 1, mitochondrial [Solanum lycopersicum]
543743	1011	3141.18	8581.05	1.47388	0	Up	0	exp9	GO:0016020//membrane;GO:0005618//cell wall;GO:0005576//extracellular region	NA	GO:0009664//plant-type cell wall organization	K20628//expansin	gi|350539003|ref|NP_001234881.1|//expansin9 precursor [Solanum lycopersicum]
BGI_novel_G007327	3992	357.67	3287.1	3.22415	0	Up	0	NA	GO:0005634//nucleus;GO:0005694//chromosome	GO:0005524//ATP binding	GO:0051276//chromosome organization	K06674//structural maintenance of chromosome 2	XP_019192681.1//PREDICTED: structural maintenance of chromosomes protein 2-1-like [Ipomoea nil]
BGI_novel_G010770	1011	7488.37	2370.31	-1.63554	0	Down	0	NA	GO:0016021//integral component of membrane	NA	NA	NA	XP_004238210.1//PREDICTED: uncharacterized protein LOC101245158 isoform X2 [Solanum lycopersicum]
101262338	1658	5306.59	1222.05	-2.09445	0	Down	0	LOC101262338	GO:0005622//intracellular;GO:0016021//integral component of membrane	GO:0005484//SNAP receptor activity	GO:0006886//intracellular protein transport;GO:0061025//membrane fusion;GO:0016192//vesicle-mediated transport	K08486//syntaxin 1B/2/3	gi|460365572|ref|XP_004228675.1|//PREDICTED: syntaxin-121-like [Solanum lycopersicum]
101248135	1093	1099.29	4932.48	2.18977	0	Up	0	LOC101248135	NA	NA	NA	K11592//endoribonuclease Dicer [EC:3.1.26.-];K10532//heparan-alpha-glucosaminide N-acetyltransferase [EC:2.3.1.78]	gi|460367266|ref|XP_004229496.1|//PREDICTED: protein FAM179B [Solanum lycopersicum]
BGI_novel_G024127	694	1651.12	5992.9	1.88384	0	Up	0	NA	GO:0005634//nucleus;GO:0000786//nucleosome	GO:0003677//DNA binding;GO:0046982//protein heterodimerization activity	GO:0006334//nucleosome assembly;GO:0006352//DNA-templated transcription, initiation	K11254//histone H4	XP_016576242.1//PREDICTED: uncharacterized protein LOC107873824 [Capsicum annuum]
101264972	1789	1468.68	5636.02	1.96419	0	Up	0	LOC101264972	NA	NA	NA	NA	gi|460403433|ref|XP_004247195.1|//PREDICTED: uncharacterized protein LOC101264972 [Solanum lycopersicum]
BGI_novel_G019767	1754	6081.15	1629.12	-1.87622	0	Down	0	NA	NA	GO:0016491//oxidoreductase activity	NA	K18980//2-methylene-furan-3-one reductase [EC:1.3.1.105]	NP_001333906.1//fructose 1,6-bisphosphate aldolase [Solanum lycopersicum]
BGI_novel_G001232	1026	496.69	3584.79	2.8755	0	Up	0	NA	NA	NA	NA	K11253//histone H3	XP_013665518.1//PREDICTED: histone H3-like centromeric protein CSE4 [Brassica napus]
101263679	1566	11679.9	4996.89	-1.20089	0	Down	0	LOC101263679	NA	NA	NA	K04628//ceramide galactosyltransferase [EC:2.4.1.47];K00699//glucuronosyltransferase [EC:2.4.1.17];K13030//cyanohydrin beta-glucosyltransferase [EC:2.4.1.85]	gi|460378617|ref|XP_004235065.1|//PREDICTED: 7-deoxyloganetin glucosyltransferase-like [Solanum lycopersicum]
101248276	515	14900.9	7181.83	-1.02894	0	Down	0	LOC101248276	NA	NA	NA	NA	gi|460378517|ref|XP_004235017.1|//PREDICTED: uncharacterized protein LOC101248276 [Solanum lycopersicum]
101253030	1861	14116.5	6643.03	-1.06344	0	Down	0	PMT5	GO:0005887//integral component of plasma membrane	GO:0005355//glucose transmembrane transporter activity;GO:0005351//sugar:proton symporter activity	GO:0046323//glucose import;GO:0015992//proton transport;GO:1904659//glucose transmembrane transport	K08150//MFS transporter, SP family, solute carrier family 2 (myo-inositol transporter), member 13	gi|663071113|ref|NP_001287655.1|//polyol transporter 5-like [Solanum lycopersicum]
BGI_novel_G015615	3559	332.2	3151.99	3.27017	0	Up	0	NA	NA	NA	GO:0019538//protein metabolic process	K03695//ATP-dependent Clp protease ATP-binding subunit ClpB	XP_004242919.1//PREDICTED: protein SMAX1-LIKE 4 [Solanum lycopersicum]
101244298	2050	6615.25	1940.01	-1.7457	0	Down	0	LOC101244298	NA	NA	NA	K01728//pectate lyase [EC:4.2.2.2]	gi|970414520|ref|NP_001305078.1|//probable pectate lyase 8 precursor [Solanum lycopersicum]
BGI_novel_G006256	837	3387.64	398.67	-3.06298	0	Down	0	NA	GO:0016021//integral component of membrane	NA	NA	NA	XP_004234037.1//PREDICTED: uncharacterized protein LOC101261585 [Solanum lycopersicum]
BGI_novel_G008359	2786	4902.99	11178.5	1.21303	0	Up	0	NA	GO:0016021//integral component of membrane	GO:0004427//inorganic diphosphatase activity;GO:0009678//hydrogen-translocating pyrophosphatase activity	GO:0015992//proton transport	K01507//inorganic pyrophosphatase [EC:3.6.1.1]	XP_015077129.1//PREDICTED: pyrophosphate-energized vacuolar membrane proton pump-like [Solanum pennellii]
BGI_novel_G000477	2883	4039.5	670.29	-2.56729	0	Down	0	NA	NA	NA	NA	K18743//caprin-1;K18667//activating signal cointegrator complex subunit 2;K13098//RNA-binding protein FUS;K11593//eukaryotic translation initiation factor 2C	XP_010323732.1//PREDICTED: uncharacterized protein LOC101261849 [Solanum lycopersicum]
BGI_novel_G022286	1613	3180.12	8506.36	1.44349	0	Up	0	NA	GO:0005874//microtubule;GO:0005737//cytoplasm	GO:0005200//structural constituent of cytoskeleton;GO:0005525//GTP binding;GO:0003924//GTPase activity	GO:0007017//microtubule-based process	K07375//tubulin beta	XP_019231885.1//PREDICTED: tubulin beta-2 chain [Nicotiana attenuata]
101264391	2360	12226.5	5410.62	-1.15211	0	Down	0	LOC101264391	NA	NA	NA	K04733//interleukin-1 receptor-associated kinase 4 [EC:2.7.11.1]	gi|460373901|ref|XP_004232751.1|//PREDICTED: putative receptor-like protein kinase At4g00960 [Solanum lycopersicum]
BGI_novel_G021249	1690	5511.51	1377.03	-1.97685	0	Down	0	NA	NA	GO:0016874//ligase activity	NA	K02184//formin 2	XP_015089639.1//PREDICTED: uncharacterized protein LOC107032545 [Solanum pennellii]
BGI_novel_G014792	1816	8491	3047	-1.45451	0	Down	0	NA	NA	GO:0016874//ligase activity	NA	K19044//E3 ubiquitin-protein ligase XBAT32/33 [EC:2.3.2.27]	NP_001265951.1//Hop-interacting protein THI033 [Solanum lycopersicum]
778213	1121	4440.44	10428.9	1.25585	0	Up	0	XTH16	NA	NA	NA	K08235//xyloglucan:xyloglucosyl transferase [EC:2.4.1.207]	gi|882939031|ref|NP_001297408.1|//xyloglucan endotransglycosylase/hydrolase 16 precursor [Solanum lycopersicum]
101268338	2015	9498.63	3669.49	-1.34811	0	Down	0	LOC101268338	NA	NA	NA	K00924//kinase [EC:2.7.1.-]	gi|723672837|ref|XP_010316441.1|//PREDICTED: aspartic proteinase-like protein 1 isoform X1 [Solanum lycopersicum]
101247612	1412	587.01	3724.13	2.68948	0	Up	0	LOC101247612	NA	NA	NA	NA	gi|460384545|ref|XP_004237971.1|//PREDICTED: zinc-finger homeodomain protein 2 [Solanum lycopersicum]
101248124	762	10780.7	4499.58	-1.23656	0	Down	0	LOC101248124	NA	NA	NA	NA	gi|460399394|ref|XP_004245226.1|//PREDICTED: uncharacterized protein LOC101248124 [Solanum lycopersicum]
101254232	2063	1109.94	4811.81	2.14013	0	Up	0	LOC101254232	NA	NA	NA	NA	gi|460402975|ref|XP_004246982.1|//PREDICTED: WEB family protein At2g38370 [Solanum lycopersicum]
BGI_novel_G018408	1058	7043.86	2234.82	-1.63217	0	Down	0	NA	GO:0005886//plasma membrane	GO:0004674//protein serine/threonine kinase activity;GO:0005524//ATP binding;GO:0004675//transmembrane receptor protein serine/threonine kinase activity	GO:0006468//protein phosphorylation;GO:0007166//cell surface receptor signaling pathway	K00924//kinase [EC:2.7.1.-]	XP_010325530.2//PREDICTED: probable receptor-like protein kinase At5g47070 [Solanum lycopersicum]
100736433	2173	13696.9	6472.21	-1.05748	0	Down	0	hsc70	NA	GO:0005524//ATP binding	NA	K03283//heat shock 70kDa protein 1/2/6/8	gi|807045793|ref|NP_001234491.2|//heat shock cognate 70 kDa protein 1 [Solanum lycopersicum]
101247877	2742	2911.93	255.54	-3.48632	0	Down	0	LOC101247877	NA	NA	NA	K14514//ethylene-insensitive protein 3	gi|460372783|ref|XP_004232204.1|//PREDICTED: phosphate transporter PHO1 homolog 3 [Solanum lycopersicum]
101252571	796	7719.25	2653.95	-1.51629	0	Down	0	LOC101252571	NA	NA	NA	K03006//DNA-directed RNA polymerase II subunit RPB1 [EC:2.7.7.6];K04733//interleukin-1 receptor-associated kinase 4 [EC:2.7.11.1]	gi|460380433|ref|XP_004235961.1|//PREDICTED: cucumber peeling cupredoxin-like [Solanum lycopersicum]
101250733	4775	2015	6431.97	1.69851	0	Up	0	LOC101250733	NA	NA	NA	K03164//DNA topoisomerase II [EC:5.99.1.3]	gi|723659967|ref|XP_010324649.1|//PREDICTED: DNA topoisomerase 2 isoform X1 [Solanum lycopersicum]
778364	1243	4344.34	855.59	-2.32011	0	Down	0	Asc-1	GO:0016021//integral component of membrane;GO:0005789//endoplasmic reticulum membrane	GO:0050291//sphingosine N-acyltransferase activity	GO:0046513//ceramide biosynthetic process	K04710//ceramide synthetase [EC:2.3.1.24]	gi|723684504|ref|XP_010318419.1|//PREDICTED: protein ASC1 isoform X1 [Solanum lycopersicum]
BGI_novel_G022172	1749	6768.05	2111.97	-1.65612	0	Down	0	NA	GO:0016020//membrane;GO:0016021//integral component of membrane	GO:0016709//oxidoreductase activity, acting on paired donors, with incorporation or reduction of molecular oxygen, NAD(P)H as one donor, and incorporation of one atom of oxygen;GO:0016705//oxidoreductase activity, acting on paired donors, with incorporation or reduction of molecular oxygen;GO:0020037//heme binding;GO:0005506//iron ion binding;GO:0004497//monooxygenase activity	GO:0044550//secondary metabolite biosynthetic process	K20618//cytochrome P450 family 76 subfamily A	XP_004249462.1//PREDICTED: cytochrome P450 76A2-like [Solanum lycopersicum]
101252574	1048	8519	3146	-1.41313	0	Down	0	LOC101252574	NA	NA	NA	NA	gi|460416368|ref|XP_004253515.1|//PREDICTED: probable acetyltransferase NATA1-like [Solanum lycopersicum]
543656	1204	4153.17	9853.3	1.27043	0	Up	0	LOC543656	NA	NA	NA	K01757//strictosidine synthase [EC:4.3.3.2]	gi|927028835|ref|NP_001234466.2|//uncharacterized protein LOC543656 precursor [Solanum lycopersicum]
543837	917	367	3112	3.10802	0	Up	0	PR-5	NA	NA	NA	K04733//interleukin-1 receptor-associated kinase 4 [EC:2.7.11.1]	gi|806776621|ref|NP_001234161.2|//PR-5x precursor [Solanum lycopersicum]
BGI_novel_G005709	2130	11576	5105.2	-1.15706	0	Down	0	NA	GO:0016021//integral component of membrane;GO:0005886//plasma membrane	GO:0008061//chitin binding;GO:0005524//ATP binding;GO:0004672//protein kinase activity	GO:0071219//cellular response to molecule of bacterial origin;GO:0045087//innate immune response;GO:0071323//cellular response to chitin	K04733//interleukin-1 receptor-associated kinase 4 [EC:2.7.11.1]	XP_004232089.1//PREDICTED: lysM domain receptor-like kinase 4 [Solanum lycopersicum]
101250310	2244	7842.93	2752.56	-1.48659	0	Down	0	LOC101250310	NA	NA	NA	K08332//vacuolar protein 8	gi|460391244|ref|XP_004241233.1|//PREDICTED: U-box domain-containing protein 13 isoform X1 [Solanum lycopersicum]
BGI_novel_G004188	2234	514.97	3458.83	2.77176	0	Up	0	NA	GO:0005774//vacuolar membrane;GO:0005622//intracellular;GO:0031201//SNARE complex	GO:0005483//soluble NSF attachment protein activity;GO:0019905//syntaxin binding	GO:0006886//intracellular protein transport;GO:0061025//membrane fusion	K21198//gamma-soluble NSF attachment protein	XP_019178959.1//PREDICTED: gamma-soluble NSF attachment protein isoform X1 [Ipomoea nil]
101267323	3529	4160.8	9840.01	1.26583	0	Up	0	LOC101267323	NA	NA	NA	K03695//ATP-dependent Clp protease ATP-binding subunit ClpB	gi|460394661|ref|XP_004242919.1|//PREDICTED: uncharacterized protein LOC101267323 [Solanum lycopersicum]
BGI_novel_G011750	1792	3123.77	8231.54	1.42191	0	Up	0	NA	GO:0005618//cell wall;GO:0000502//proteasome complex	NA	NA	K06694//26S proteasome non-ATPase regulatory subunit 10	XP_004239075.1//PREDICTED: 26S proteasome non-ATPase regulatory subunit 10 [Solanum lycopersicum]
BGI_novel_G000676	2850	4945.7	1161.22	-2.0665	0	Down	0	NA	GO:0016021//integral component of membrane	GO:0005452//inorganic anion exchanger activity	NA	K13862//solute carrier family 4 (sodium borate transporter), member 11;K06573//solute carrier family 4 (anion exchanger), member 1	XP_010319275.1//PREDICTED: boron transporter 1 isoform X1 [Solanum lycopersicum]
101268787	1893	12349.4	5638.42	-1.10705	0	Down	0	LOC101268787	NA	NA	NA	K10268//F-box and leucine-rich repeat protein 2/20;K13424//WRKY transcription factor 33	gi|460401603|ref|XP_004246308.1|//PREDICTED: probable WRKY transcription factor 26 [Solanum lycopersicum]
BGI_novel_G014631	4028	569.31	3579.42	2.67647	0	Up	0	NA	GO:0005634//nucleus	GO:0003700//DNA binding transcription factor activity;GO:0046983//protein dimerization activity	GO:0006355//regulation of transcription, DNA-templated;GO:0048364//root development	K08867//WNK lysine deficient protein kinase [EC:2.7.11.1]	XP_004242114.1//PREDICTED: transcription factor LHW-like isoform X1 [Solanum lycopersicum]
BGI_novel_G001525	2081	14474	7098.13	-1.00392	0	Down	0	NA	GO:0016021//integral component of membrane	GO:0046983//protein dimerization activity	NA	K16189//phytochrome-interacting factor 4;K12126//phytochrome-interacting factor 3	XP_004229781.1//PREDICTED: transcription factor UNE10 [Solanum lycopersicum]
100736448	3070	145.44	2475.6	4.11332	0	Up	0	ARF5	GO:0005634//nucleus	GO:0003677//DNA binding	GO:0006355//regulation of transcription, DNA-templated;GO:0009734//auxin-activated signaling pathway	K14486//auxin response factor	gi|350539842|ref|NP_001234545.1|//auxin response factor 5 [Solanum lycopersicum]
BGI_novel_G017146	1602	10335.7	4327.91	-1.23186	0	Down	0	NA	GO:0005618//cell wall;GO:0005576//extracellular region	GO:0016787//hydrolase activity	GO:0071555//cell wall organization	K19882//O-palmitoleoyl-L-serine hydrolase [EC:3.1.1.98]	XP_010677538.1//PREDICTED: pectin acetylesterase 8 isoform X1 [Beta vulgaris subsp. vulgaris]
BGI_novel_G004236	1774	2227	6724.17	1.61829	0	Up	0	NA	GO:0005634//nucleus;GO:0005829//cytosol;GO:0005622//intracellular;GO:0016021//integral component of membrane;GO:0005886//plasma membrane	GO:0005215//transporter activity	NA	K19996//phosphatidylinositol transfer protein SFH5	XP_004233146.1//PREDICTED: patellin-4 [Solanum lycopersicum]
BGI_novel_G019457	881	6523.83	2021.56	-1.66622	0	Down	0	NA	GO:0005737//cytoplasm	GO:0004364//glutathione transferase activity	GO:0006749//glutathione metabolic process;GO:0009407//toxin catabolic process	K00799//glutathione S-transferase [EC:2.5.1.18]	XP_004246381.1//PREDICTED: probable glutathione S-transferase [Solanum lycopersicum]
BGI_novel_G011634	2728	1748.76	5870.03	1.77107	0	Up	0	NA	GO:0016021//integral component of membrane;GO:0005886//plasma membrane	GO:0004674//protein serine/threonine kinase activity;GO:0005524//ATP binding;GO:0004675//transmembrane receptor protein serine/threonine kinase activity	GO:0006468//protein phosphorylation;GO:0007166//cell surface receptor signaling pathway	K13418//somatic embryogenesis receptor kinase 1 [EC:2.7.10.1 2.7.11.1]	XP_004238998.1//PREDICTED: protein NSP-INTERACTING KINASE 1 [Solanum lycopersicum]
BGI_novel_G020753	1401	4735.34	1084.45	-2.10247	0	Down	0	NA	NA	NA	NA	K05747//Wiskott-Aldrich syndrome protein	XP_015087797.1//PREDICTED: extensin-2-like isoform X3 [Solanum pennellii]
BGI_novel_G007971	2462	49.72	2206.1	5.49556	0	Up	0	NA	GO:0016021//integral component of membrane	GO:0004674//protein serine/threonine kinase activity;GO:0005524//ATP binding	NA	K13418//somatic embryogenesis receptor kinase 1 [EC:2.7.10.1 2.7.11.1];K04733//interleukin-1 receptor-associated kinase 4 [EC:2.7.11.1]	XP_010318957.1//PREDICTED: LRR receptor-like serine/threonine-protein kinase FEI 2 [Solanum lycopersicum]
BGI_novel_G014773	2567	5735.86	1604.06	-1.81425	0	Down	0	NA	NA	NA	NA	NA	XP_010322315.1//PREDICTED: auxin-regulated protein isoform X1 [Solanum lycopersicum]
101262296	888	8342	3121	-1.39435	0	Down	0	LOC101262296	NA	NA	NA	NA	gi|460379321|ref|XP_004235412.1|//PREDICTED: miraculin-like [Solanum lycopersicum]
BGI_novel_G001823	2129	5260.55	11344.1	1.13269	0	Up	0	NA	GO:0005634//nucleus	GO:0043565//sequence-specific DNA binding;GO:0003700//DNA binding transcription factor activity	GO:0006351//transcription, DNA-templated	K13457//disease resistance protein RPM1;K16225//probable WRKY transcription factor 52	NP_001234530.1//WRKY transcription factor [Solanum lycopersicum]
101260125	1202	6259.6	1904.22	-1.69284	0	Down	0	SlMMP2	GO:0031012//extracellular matrix	GO:0004222//metalloendopeptidase activity;GO:0008270//zinc ion binding	GO:0006508//proteolysis	K07761//metalloendoproteinase 5-MMP [EC:3.4.24.-]	gi|723690843|ref|XP_004237082.2|//PREDICTED: metalloendoproteinase 1 [Solanum lycopersicum]
BGI_novel_G017706	3669	8363.79	3141.11	-1.38885	0	Down	0	NA	GO:0005794//Golgi apparatus;GO:0016021//integral component of membrane;GO:0005886//plasma membrane	GO:0016760//cellulose synthase (UDP-forming) activity;GO:0016759//cellulose synthase activity;GO:0046872//metal ion binding	GO:0009833//plant-type primary cell wall biogenesis;GO:0030244//cellulose biosynthetic process;GO:0071555//cell wall organization	K10999//cellulose synthase A [EC:2.4.1.12]	XP_004245031.1//PREDICTED: cellulose synthase A catalytic subunit 1 [UDP-forming] [Solanum lycopersicum]
101264778	704	10483.1	4485.99	-1.20053	0	Down	0	LOC101264778	NA	NA	NA	NA	gi|460373232|ref|XP_004232425.1|//PREDICTED: uncharacterized protein LOC101264778 [Solanum lycopersicum]
101262321	3232	10644	4608	-1.18379	0	Down	0	SlGLR2.2	GO:0016021//integral component of membrane	GO:0004970//ionotropic glutamate receptor activity	GO:0035235//ionotropic glutamate receptor signaling pathway;GO:0006811//ion transport	K05387//glutamate receptor, ionotropic, plant	gi|723710022|ref|XP_004241863.2|//PREDICTED: glutamate receptor 2.8-like [Solanum lycopersicum]
BGI_novel_G001123	3348	2320.55	6781.64	1.5712	0	Up	0	NA	GO:0016021//integral component of membrane	GO:0005524//ATP binding;GO:0004672//protein kinase activity	NA	K00924//kinase [EC:2.7.1.-]	XP_004229499.1//PREDICTED: leucine-rich repeat receptor-like serine/threonine-protein kinase BAM3 [Solanum lycopersicum]
BGI_novel_G023467	3136	5019.7	10940	1.14797	0	Up	0	NA	GO:0005634//nucleus;GO:0042555//MCM complex	GO:0003677//DNA binding;GO:0005524//ATP binding;GO:0003678//DNA helicase activity	GO:0006268//DNA unwinding involved in DNA replication;GO:0006270//DNA replication initiation	K02540//DNA replication licensing factor MCM2 [EC:3.6.4.12]	XP_004250699.2//PREDICTED: DNA replication licensing factor MCM2 [Solanum lycopersicum]
101264386	1530	2174.67	29.61	-6.17454	0	Down	0	LOC101264386	GO:0033179//proton-transporting V-type ATPase, V0 domain	GO:0015078//hydrogen ion transmembrane transporter activity	GO:0015991//ATP hydrolysis coupled proton transport	K02146//V-type H+-transporting ATPase subunit d	gi|565344186|ref|XP_006339198.1|//PREDICTED: V-type proton ATPase subunit d2 [Solanum tuberosum]
BGI_novel_G010927	3984	1505.56	5324.4	1.84635	0	Up	0	NA	GO:0016020//membrane;GO:0005634//nucleus	GO:0003677//DNA binding;GO:0042802//identical protein binding;GO:0044212//transcription regulatory region DNA binding	GO:0048507//meristem development;GO:0006355//regulation of transcription, DNA-templated;GO:0010305//leaf vascular tissue pattern formation;GO:0009734//auxin-activated signaling pathway;GO:0006351//transcription, DNA-templated;GO:0048364//root development;GO:0009908//flower development;GO:0009942//longitudinal axis specification	K14486//auxin response factor	NP_001234545.1//auxin response factor 5 [Solanum lycopersicum]
778260	2393	2263.84	91.88	-4.59884	0	Down	0	sfr2	GO:0016021//integral component of membrane	GO:0008422//beta-glucosidase activity	GO:1901657//glycosyl compound metabolic process;GO:0005975//carbohydrate metabolic process	K01188//beta-glucosidase [EC:3.2.1.21]	gi|350540114|ref|NP_001233879.1|//beta-glycosidase-like [Solanum lycopersicum]
101261689	2055	1147.37	4643.95	2.04105	0	Up	0	LOC101261689	GO:0009505//plant-type cell wall;GO:0046658//anchored component of plasma membrane	GO:0004553//hydrolase activity, hydrolyzing O-glycosyl compounds	GO:0005975//carbohydrate metabolic process	K19891//glucan endo-1,3-beta-glucosidase 1/2/3 [EC:3.2.1.39]	gi|460412516|ref|XP_004251644.1|//PREDICTED: glucan endo-1,3-beta-glucosidase 13 [Solanum lycopersicum]
101258203	3450	2665.25	5.56	-8.88094	0	Down	0	LOC101258203	NA	NA	NA	K04630//guanine nucleotide-binding protein G(i) subunit alpha	gi|460369994|ref|XP_004230840.1|//PREDICTED: extra-large guanine nucleotide-binding protein 1-like [Solanum lycopersicum]
101260686	2794	7467.67	2656.07	-1.46733	0	Down	0	LOC101260686	NA	NA	NA	K01889//phenylalanyl-tRNA synthetase alpha chain [EC:6.1.1.20];K17535//serine/threonine-protein kinase TNNI3K [EC:2.7.11.1];K11649//SWI/SNF related-matrix-associated actin-dependent regulator of chromatin subfamily C;K15030//translation initiation factor 3 subunit M	gi|970061270|ref|XP_015057425.1|//PREDICTED: F-box protein At3g07870-like [Solanum pennellii]
BGI_novel_G012292	3015	1108.78	4549.35	2.06072	0	Up	0	NA	GO:0009507//chloroplast	GO:0004473//malate dehydrogenase (decarboxylating) (NADP+) activity;GO:0004471//malate dehydrogenase (decarboxylating) (NAD+) activity;GO:0046872//metal ion binding;GO:0051287//NAD binding	GO:0006090//pyruvate metabolic process;GO:0006108//malate metabolic process	K00029//malate dehydrogenase (oxaloacetate-decarboxylating)(NADP+) [EC:1.1.1.40]	XP_019191942.1//PREDICTED: NADP-dependent malic enzyme-like isoform X1 [Ipomoea nil]
101261461	1617	10675	4706.35	-1.15753	0	Down	0	LOC101261461	NA	NA	NA	K08900//mitochondrial chaperone BCS1	gi|460405559|ref|XP_004248243.1|//PREDICTED: probable mitochondrial chaperone BCS1-A [Solanum lycopersicum]
101247596	4154	3094.34	404.08	-2.91289	0	Down	0	LOC101247596	GO:0016021//integral component of membrane	GO:0016760//cellulose synthase (UDP-forming) activity	GO:0030244//cellulose biosynthetic process;GO:0071555//cell wall organization	K20924//cellulose synthase-like protein [EC:2.4.1.-]	gi|460379057|ref|XP_004235281.1|//PREDICTED: cellulose synthase-like protein D3 [Solanum lycopersicum]
BGI_novel_G015459	1764	5873.36	12054.4	1.06133	0	Up	0	NA	NA	NA	NA	K11131//H/ACA ribonucleoprotein complex subunit 4 [EC:5.4.99.-]	XP_004242786.1//PREDICTED: suppressor protein SRP40 [Solanum lycopersicum]
101266186	956	1174.83	4653.94	2.01003	0	Up	0	LOC101266186	NA	NA	NA	K06688//ubiquitin-conjugating enzyme E2 C [EC:2.3.2.23]	gi|460411017|ref|XP_004250911.1|//PREDICTED: ubiquitin-conjugating enzyme E2 20 [Solanum lycopersicum]
101055590	1245	9309.42	3833.15	-1.25613	0	Down	0	Sl3-MMP	GO:0031012//extracellular matrix	GO:0004222//metalloendopeptidase activity;GO:0008270//zinc ion binding	GO:0006508//proteolysis	K07761//metalloendoproteinase 5-MMP [EC:3.4.24.-]	gi|525314090|ref|NP_001266203.1|//matrix metalloproteinase precursor [Solanum lycopersicum]
101250910	3248	264.94	2658.75	3.35104	0	Up	0	LOC101250910	NA	NA	NA	K00924//kinase [EC:2.7.1.-]	gi|460399249|ref|XP_004245154.1|//PREDICTED: probably inactive leucine-rich repeat receptor-like protein kinase At2g25790 [Solanum lycopersicum]
101247482	1681	2749.44	278.01	-3.2819	0	Down	0	LOC101247482	GO:0000015//phosphopyruvate hydratase complex	GO:0000287//magnesium ion binding;GO:0004634//phosphopyruvate hydratase activity	GO:0006096//glycolytic process	K01689//enolase [EC:4.2.1.11]	gi|460408278|ref|XP_004249573.1|//PREDICTED: enolase-like [Solanum lycopersicum]
BGI_novel_G020586	2304	7457.42	2683.15	-1.45072	0	Down	0	NA	GO:0005623//cell	GO:0050661//NADP binding;GO:0009055//electron transfer activity;GO:0050660//flavin adenine dinucleotide binding;GO:0004362//glutathione-disulfide reductase activity	GO:0006749//glutathione metabolic process;GO:0045454//cell redox homeostasis	K00383//glutathione reductase (NADPH) [EC:1.8.1.7]	XP_016452597.1//PREDICTED: glutathione reductase, chloroplastic-like isoform X1 [Nicotiana tabacum]
BGI_novel_G004583	1059	409.25	3009.96	2.90272	0	Up	0	NA	NA	GO:0005199//structural constituent of cell wall	NA	K01051//pectinesterase [EC:3.1.1.11]	XP_004232891.1//PREDICTED: pistil-specific extensin-like protein [Solanum lycopersicum]
BGI_novel_G005006	1632	3398.9	541.89	-2.62496	0	Down	0	NA	GO:0016021//integral component of membrane	NA	GO:0055085//transmembrane transport	K07088//uncharacterized protein	XP_004232583.1//PREDICTED: protein PIN-LIKES 7-like [Solanum lycopersicum]
101265657	3645	11528.3	5329.97	-1.08895	0	Down	0	LOC101265657	NA	NA	NA	K19476//vacuolar protein sorting-associated protein IST1	gi|460395146|ref|XP_004243148.1|//PREDICTED: uncharacterized protein LOC101265657 [Solanum lycopersicum]
BGI_novel_G004251	1099	6179.47	12411.1	1.03011	0	Up	0	NA	GO:0005840//ribosome;GO:0022627//cytosolic small ribosomal subunit	GO:0003723//RNA binding;GO:0003735//structural constituent of ribosome;GO:0019843//rRNA binding	GO:0006412//translation	K02987//small subunit ribosomal protein S4e	XP_010316939.1//PREDICTED: 40S ribosomal protein S4 [Solanum lycopersicum]
BGI_novel_G019349	754	411.86	3000.52	2.88902	0	Up	0	NA	GO:0005634//nucleus;GO:0000790//nuclear chromatin;GO:0000786//nucleosome	GO:0003677//DNA binding;GO:0046982//protein heterodimerization activity	GO:0006342//chromatin silencing	K11251//histone H2A	XP_004246465.1//PREDICTED: histone H2A-like [Solanum lycopersicum]
BGI_novel_G009694	1003	9921.22	4271.42	-1.19177	0	Down	0	NA	GO:0005737//cytoplasm	GO:0008757//S-adenosylmethionine-dependent methyltransferase activity;GO:0008168//methyltransferase activity	GO:0032259//methylation	K08869//aarF domain-containing kinase	XP_004237334.1//PREDICTED: putative methyltransferase DDB_G0268948 [Solanum lycopersicum]
BGI_novel_G005450	1872	3019.78	7730.61	1.38017	0	Up	0	NA	GO:0016021//integral component of membrane;GO:0005886//plasma membrane	GO:0022857//transmembrane transporter activity	GO:0006810//transport	K17500//integrin-linked kinase-associated serine/threonine phosphatase 2C [EC:3.1.3.16];K07874//Ras-related protein Rab-1A	XP_004232282.1//PREDICTED: WAT1-related protein At3g28050 [Solanum lycopersicum]
543987	1367	4579.26	1110.19	-2.02027	0	Down	0	LOC543987	GO:0046658//anchored component of plasma membrane;GO:0005773//vacuole	GO:0042973//glucan endo-1,3-beta-D-glucosidase activity;GO:0030247//polysaccharide binding	GO:0006952//defense response;GO:0005975//carbohydrate metabolic process	K19891//glucan endo-1,3-beta-glucosidase 1/2/3 [EC:3.2.1.39]	gi|350537435|ref|NP_001234805.1|//glucan endo-1,3-beta-glucosidase B precursor [Solanum lycopersicum]
BGI_novel_G001366	2924	5747.48	1734.79	-1.70414	0	Down	0	NA	NA	GO:0004252//serine-type endopeptidase activity;GO:0042802//identical protein binding	NA	K12619//5'-3' exoribonuclease 2 [EC:3.1.13.-];K13199//plasminogen activator inhibitor 1 RNA-binding protein;K15333//tRNA guanosine-2'-O-methyltransferase [EC:2.1.1.34];K14568//rRNA small subunit pseudouridine methyltransferase Nep1 [EC:2.1.1.260]	NP_001234774.1//subtilisin-like protease precursor [Solanum lycopersicum]
101245200	1648	6782.96	2329.28	-1.518	0	Down	0	LOC101245200	NA	NA	NA	K01669//deoxyribodipyrimidine photo-lyase [EC:4.1.99.3]	gi|460403878|ref|XP_004247413.1|//PREDICTED: blue-light photoreceptor PHR2 [Solanum lycopersicum]
101260866	2391	9241.86	3851.34	-1.23879	0	Down	0	LOC101260866	NA	NA	NA	NA	gi|460367463|ref|XP_004229593.1|//PREDICTED: uncharacterized protein At1g04910-like [Solanum lycopersicum]
101250465	1688	8585.64	3436.26	-1.29705	0	Down	0	LOC101250465	NA	NA	NA	K15889//prenylcysteine alpha-carboxyl methylesterase [EC:3.1.1.-]	gi|460372634|ref|XP_004232133.1|//PREDICTED: formin-2 [Solanum lycopersicum]
544083	917	3959	819	-2.24917	0	Down	0	PR-1a1	GO:0005576//extracellular region	NA	GO:0006952//defense response;GO:0009607//response to biotic stimulus	K13449//pathogenesis-related protein 1	gi|808175927|ref|NP_001234128.2|//pathogenesis-related protein 1A1 precursor [Solanum lycopersicum]
101257809	3727	8157.67	3178.37	-1.33584	0	Down	0	LOC101257809	NA	NA	NA	K10661//E3 ubiquitin-protein ligase MARCH6 [EC:2.3.2.27]	gi|723665263|ref|XP_010315222.1|//PREDICTED: probable E3 ubiquitin ligase SUD1 [Solanum lycopersicum]
101265886	996	6508.02	2184.41	-1.55094	0	Down	0	LOC101265886	GO:0010287//plastoglobule;GO:0009535//chloroplast thylakoid membrane;GO:0009523//photosystem II;GO:0016021//integral component of membrane;GO:0009941//chloroplast envelope;GO:0009522//photosystem I	GO:0031409//pigment binding;GO:0046872//metal ion binding;GO:0016168//chlorophyll binding	GO:0009768//photosynthesis, light harvesting in photosystem I;GO:0009416//response to light stimulus;GO:0018298//protein-chromophore linkage	K08912//light-harvesting complex II chlorophyll a/b binding protein 1	gi|460374596|ref|XP_004233096.1|//PREDICTED: chlorophyll a-b binding protein 1C, chloroplastic [Solanum lycopersicum]
101263879	1656	1855.63	5780.28	1.66326	0	Up	0	LOC101263879	NA	NA	NA	K05605//3-hydroxyisobutyryl-CoA hydrolase [EC:3.1.2.4]	gi|460412872|ref|XP_004251820.1|//PREDICTED: 3-hydroxyisobutyryl-CoA hydrolase-like protein 5 [Solanum lycopersicum]
BGI_novel_G015688	2718	877.5	3971	2.20206	0	Up	0	NA	NA	NA	NA	K11323//histone arginine demethylase JMJD6 [EC:1.14.11.-]	XP_004242963.1//PREDICTED: uncharacterized protein LOC101262432 isoform X2 [Solanum lycopersicum]
101251442	2132	7910.31	3034.36	-1.35831	0	Down	0	LOC101251442	GO:0016021//integral component of membrane	NA	GO:0055085//transmembrane transport	NA	gi|460410675|ref|XP_004250747.1|//PREDICTED: uncharacterized protein LOC101251442 [Solanum lycopersicum]
BGI_novel_G016602	1927	12501.4	6071.4	-1.01795	0	Down	0	NA	GO:0016021//integral component of membrane	GO:0016705//oxidoreductase activity, acting on paired donors, with incorporation or reduction of molecular oxygen;GO:0020037//heme binding;GO:0005506//iron ion binding;GO:0004497//monooxygenase activity	NA	K07428//cytochrome P450 family 4 subfamily X [EC:1.14.14.1]	XP_006348304.1//PREDICTED: cytochrome P450 CYP72A219-like isoform X1 [Solanum tuberosum]
101256182	1172	5220.18	1469.13	-1.8051	0	Down	0	LOC101256182	NA	NA	NA	NA	gi|460386822|ref|XP_004239095.1|//PREDICTED: uncharacterized protein LOC101256182 [Solanum lycopersicum]
BGI_novel_G019580	4043	5701	11612.3	1.0504	0	Up	0	NA	GO:0005840//ribosome;GO:0005743//mitochondrial inner membrane;GO:0016021//integral component of membrane;GO:0005739//mitochondrion;GO:0070469//respiratory chain	GO:0003723//RNA binding;GO:0004129//cytochrome-c oxidase activity;GO:0005507//copper ion binding;GO:0003735//structural constituent of ribosome	GO:0022900//electron transport chain;GO:0006412//translation	K02982//small subunit ribosomal protein S3	YP_009242009.1//cytochrome c oxidase subunit 2 (mitochondrion) [Oryza minuta]
BGI_novel_G003568	4192	5773.19	1784.36	-1.66993	0	Down	0	NA	GO:0005737//cytoplasm	GO:0005524//ATP binding;GO:0004672//protein kinase activity;GO:0004871//signal transducer activity	GO:0006468//protein phosphorylation;GO:0035556//intracellular signal transduction	K04422//mitogen-activated protein kinase kinase kinase 13 [EC:2.7.11.25]	XP_010315674.1//PREDICTED: uncharacterized protein LOC101248436 [Solanum lycopersicum]
BGI_novel_G012383	1118	59.62	1999.03	5.09139	0	Up	0	NA	GO:0005634//nucleus;GO:0000786//nucleosome	GO:0003677//DNA binding	GO:0006355//regulation of transcription, DNA-templated;GO:0006334//nucleosome assembly	K11275//histone H1/5	XP_004240031.1//PREDICTED: HMG-Y-related protein B-like [Solanum lycopersicum]
543641	3251	2437.28	6718.77	1.48696	0	Up	0	LOC543641	NA	NA	NA	K04733//interleukin-1 receptor-associated kinase 4 [EC:2.7.11.1]	gi|723678720|ref|XP_010317417.1|//PREDICTED: probable LRR receptor-like serine/threonine-protein kinase At1g53420 isoform X1 [Solanum lycopersicum]
101253547	1096	788	3760	2.2785	0	Up	0	LOC101253547	NA	NA	NA	K16222//Dof zinc finger protein DOF5.5	gi|460372489|ref|XP_004232062.1|//PREDICTED: dof zinc finger protein DOF1.7-like [Solanum lycopersicum]
101253385	1818	2059.43	76.18	-4.73266	0	Down	0	LOC101253385	NA	NA	NA	NA	gi|460390825|ref|XP_004241025.1|//PREDICTED: uncharacterized protein LOC101253385 [Solanum lycopersicum]
BGI_novel_G002745	1878	566.1	3262.92	2.55107	0	Up	0	NA	GO:0043231//intracellular membrane-bounded organelle	GO:0080043//quercetin 3-O-glucosyltransferase activity;GO:0080044//quercetin 7-O-glucosyltransferase activity;GO:0016758//transferase activity, transferring hexosyl groups	GO:0008152//metabolic process	K21374//7-deoxyloganetin glucosyltransferase [EC:2.4.1.324]	XP_004231354.1//PREDICTED: 7-deoxyloganetin glucosyltransferase-like [Solanum lycopersicum]
101259361	1512	3226	519	-2.61191	0	Down	0	LOC101259361	NA	NA	NA	K15227//arogenate dehydrogenase (NADP+), plant [EC:1.3.1.78]	gi|460401710|ref|XP_004246360.1|//PREDICTED: arogenate dehydrogenase 2, chloroplastic-like [Solanum lycopersicum]
BGI_novel_G014990	2037	204.24	2367.22	3.55889	0	Up	0	NA	GO:0030529//intracellular ribonucleoprotein complex;GO:0005829//cytosol	GO:0003729//mRNA binding	GO:0006810//transport	K17265//Ras GTPase-activating protein-binding protein 1 [EC:3.6.4.12 3.6.4.13]	XP_010323094.1//PREDICTED: putative G3BP-like protein isoform X4 [Solanum lycopersicum]
BGI_novel_G006028	1660	1843.72	5686.51	1.64896	0	Up	0	NA	GO:0005634//nucleus;GO:0016021//integral component of membrane	NA	NA	K14505//cyclin D3, plant	NP_001233794.1//cyclin D3.1 [Solanum lycopersicum]
BGI_novel_G007532	2010	2832.49	362.22	-2.9431	0	Down	0	NA	GO:0009507//chloroplast	GO:0016301//kinase activity;GO:0016773//phosphotransferase activity, alcohol group as acceptor	GO:0015979//photosynthesis	K20221//importin-4;K00847//fructokinase [EC:2.7.1.4]	XP_010318288.1//PREDICTED: uncharacterized protein LOC101257345 [Solanum lycopersicum]
101246897	1635	2718.17	318.55	-3.06901	0	Down	0	LOC101246897	NA	NA	NA	NA	gi|723748460|ref|XP_010313887.1|//PREDICTED: peptidyl-prolyl cis-trans isomerase CYP37, chloroplastic isoform X1 [Solanum lycopersicum]
BGI_novel_G000339	1200	595.48	3307.43	2.49762	0	Up	0	NA	GO:0005615//extracellular space;GO:0046658//anchored component of plasma membrane	GO:0042973//glucan endo-1,3-beta-D-glucosidase activity;GO:0004553//hydrolase activity, hydrolyzing O-glycosyl compounds;GO:0030247//polysaccharide binding	GO:0006952//defense response;GO:0005975//carbohydrate metabolic process	K19891//glucan endo-1,3-beta-glucosidase 1/2/3 [EC:3.2.1.39]	NP_001234798.2//glucan endo-1,3-beta-glucosidase A precursor [Solanum lycopersicum]
101246008	3201	2885.69	7373.21	1.37741	0	Up	0	LOC101246008	NA	NA	NA	K11984//U4/U6.U5 tri-snRNP-associated protein 1	gi|460409270|ref|XP_004250062.1|//PREDICTED: U4/U6.U5 tri-snRNP-associated protein 1 [Solanum lycopersicum]
BGI_novel_G016044	2047	3819.38	797.4	-2.23593	0	Down	0	NA	GO:0005777//peroxisome	NA	NA	NA	XP_004243555.1//PREDICTED: uncharacterized protein LOC101255117 [Solanum lycopersicum]
BGI_novel_G005501	760	209.41	2358.96	3.51778	0	Up	0	NA	NA	GO:0003993//acid phosphatase activity	NA	K13024//inositol-hexakisphosphate/diphosphoinositol-pentakisphosphate 1-kinase [EC:2.7.4.24]	XP_004232245.1//PREDICTED: inositol hexakisphosphate and diphosphoinositol-pentakisphosphate kinase 2 isoform X2 [Solanum lycopersicum]
BGI_novel_G005108	2292	212.01	2358.72	3.49983	0	Up	0	NA	NA	NA	NA	K00434//L-ascorbate peroxidase [EC:1.11.1.11]	XP_004233743.1//PREDICTED: protein POLLENLESS 3-LIKE 2 [Solanum lycopersicum]
BGI_novel_G004391	2166	3544.12	677.75	-2.36257	0	Down	0	NA	NA	NA	NA	K03120//transcription initiation factor TFIID TATA-box-binding protein;K01183//chitinase [EC:3.2.1.14];K14638//solute carrier family 15 (peptide/histidine transporter), member 3/4	XP_004232984.1//PREDICTED: MACPF domain-containing protein CAD1 [Solanum lycopersicum]
101259275	1150	10607.8	4880.48	-1.09599	0	Down	0	LOC101259275	NA	NA	NA	K04733//interleukin-1 receptor-associated kinase 4 [EC:2.7.11.1];K03868//RING-box protein 1	gi|460400511|ref|XP_004245778.1|//PREDICTED: GEM-like protein 5 [Solanum lycopersicum]
778230	1966	5659.27	1771.36	-1.65173	0	Down	0	AO	NA	NA	NA	K00423//L-ascorbate oxidase [EC:1.10.3.3]	gi|809281420|ref|NP_001234829.2|//ascorbate oxidase precursor [Solanum lycopersicum]
101255874	1699	4553.08	1174.77	-1.93043	0	Down	0	LOC101255874	NA	NA	NA	K15403//fatty acid omega-hydroxy dehydrogenase [EC:1.1.-.-]	gi|460381301|ref|XP_004236390.1|//PREDICTED: protein HOTHEAD [Solanum lycopersicum]
BGI_novel_G023985	2300	352.89	2705.91	2.96286	0	Up	0	NA	GO:0005886//plasma membrane	GO:0008422//beta-glucosidase activity;GO:0004553//hydrolase activity, hydrolyzing O-glycosyl compounds	GO:0009251//glucan catabolic process;GO:0005975//carbohydrate metabolic process	K05349//beta-glucosidase [EC:3.2.1.21]	XP_004241371.1//PREDICTED: uncharacterized protein LOC101266643 [Solanum lycopersicum]
BGI_novel_G019361	1960	3833.9	8739.34	1.21274	0	Up	0	NA	NA	GO:0046872//metal ion binding;GO:0005096//GTPase activator activity	NA	K12492//ADP-ribosylation factor GTPase-activating protein 1	XP_004246418.1//PREDICTED: probable ADP-ribosylation factor GTPase-activating protein AGD6 [Solanum lycopersicum]
101245244	1860	2164.33	142.96	-3.8962	0	Down	0	LOC101245244	GO:0009507//chloroplast	GO:0003746//translation elongation factor activity;GO:0005525//GTP binding;GO:0003924//GTPase activity	GO:0006414//translational elongation	K02358//elongation factor Tu	gi|723687996|ref|XP_010319023.1|//PREDICTED: elongation factor TuA, chloroplastic [Solanum lycopersicum]
101243829	1421	1482.52	4951.96	1.76398	0	Up	0	LOC101243829	NA	NA	NA	NA	gi|723663105|ref|XP_004230290.2|//PREDICTED: uncharacterized protein LOC101243829 [Solanum lycopersicum]
101248242	709	7126.64	2677.58	-1.38826	0	Down	0	LOC101248242	NA	NA	NA	NA	gi|460369593|ref|XP_004230646.1|//PREDICTED: gamete and mating-type specific protein A-like isoform X1 [Solanum lycopersicum]
BGI_novel_G009416	683	5822.83	11555.3	1.01279	0	Up	0	NA	GO:0005634//nucleus;GO:0000786//nucleosome	GO:0003677//DNA binding;GO:0046982//protein heterodimerization activity	GO:0006334//nucleosome assembly;GO:0006352//DNA-templated transcription, initiation	K11254//histone H4	XP_016507811.1//PREDICTED: uncharacterized protein LOC107825453 [Nicotiana tabacum]
BGI_novel_G014011	935	5303.75	10824.2	1.05321	0	Up	0	NA	GO:0005840//ribosome;GO:0022625//cytosolic large ribosomal subunit	GO:0003723//RNA binding;GO:0003735//structural constituent of ribosome	GO:0006412//translation	K02882//large subunit ribosomal protein L18Ae	OIT02612.1//60s ribosomal protein l18a, partial [Nicotiana attenuata]
101245851	1717	5557.23	1752.41	-1.64099	0	Down	0	LOC101245851	NA	NA	NA	K12449//UDP-apiose/xylose synthase	gi|460391381|ref|XP_004241299.1|//PREDICTED: UDP-D-apiose/UDP-D-xylose synthase 2-like [Solanum lycopersicum]
543917	1309	9874.28	4460.46	-1.12245	0	Down	0	NAC1	GO:0005634//nucleus	GO:0003677//DNA binding	GO:0006355//regulation of transcription, DNA-templated	K12581//CCR4-NOT transcription complex subunit 7/8;K03094//S-phase kinase-associated protein 1;K13126//polyadenylate-binding protein;K05941//glutathione gamma-glutamylcysteinyltransferase [EC:2.3.2.15];K01054//acylglycerol lipase [EC:3.1.1.23]	gi|350536035|ref|NP_001234482.1|//NAC domain protein [Solanum lycopersicum]
101267059	2522	2669.96	336.08	-2.96591	0	Down	0	LOC101267059	NA	NA	NA	K03253//translation initiation factor 3 subunit B	gi|460367669|ref|XP_004229693.1|//PREDICTED: eukaryotic translation initiation factor 3 subunit B [Solanum lycopersicum]
BGI_novel_G007338	819	320.76	2567.56	3.02486	0	Up	0	NA	NA	NA	NA	NA	XP_004235174.1//PREDICTED: PLAT domain-containing protein 3-like [Solanum lycopersicum]
101255438	2585	2154.38	150.23	-3.81799	0	Down	0	LOC101255438	NA	GO:0004725//protein tyrosine phosphatase activity	GO:0035335//peptidyl-tyrosine dephosphorylation	K01110//phosphatidylinositol-3,4,5-trisphosphate 3-phosphatase and dual-specificity protein phosphatase PTEN [EC:3.1.3.16 3.1.3.48 3.1.3.67]	gi|460369810|ref|XP_004230750.1|//PREDICTED: phosphatidylinositol 3,4,5-trisphosphate 3-phosphatase and dual-specificity protein phosphatase PTEN [Solanum lycopersicum]
BGI_novel_G021170	715	2094.76	130.03	-3.98584	0	Down	0	NA	NA	NA	NA	NA	XP_004248104.1//PREDICTED: organ-specific protein S2-like [Solanum lycopersicum]
544181	3213	9460.5	4211.32	-1.14361	0	Down	0	PLDb1	NA	NA	NA	K01115//phospholipase D1/2 [EC:3.1.4.4]	gi|723723669|ref|XP_010325303.1|//PREDICTED: phospholipase PLDb1 isoform X1 [Solanum lycopersicum]
101266818	2318	2900.25	7214.29	1.33871	0	Up	0	LOC101266818	NA	NA	NA	K19476//vacuolar protein sorting-associated protein IST1;K14209//solute carrier family 36 (proton-coupled amino acid transporter);K15015//solute carrier family 32 (vesicular inhibitory amino acid transporter)	gi|460385005|ref|XP_004238196.1|//PREDICTED: lysine histidine transporter-like 8 [Solanum lycopersicum]
BGI_novel_G010433	925	4105	1004.66	-2.00664	0	Down	0	NA	NA	NA	NA	K02183//calmodulin	XP_004237969.1//PREDICTED: esterase CG5412 isoform X3 [Solanum lycopersicum]
544016	2013	7400.13	2905.85	-1.32456	0	Down	0	PMEU1	GO:0005618//cell wall;GO:0005576//extracellular region;GO:0016021//integral component of membrane	GO:0045330//aspartyl esterase activity;GO:0030599//pectinesterase activity;GO:0046910//pectinesterase inhibitor activity	GO:0045490//pectin catabolic process;GO:0043086//negative regulation of catalytic activity;GO:0042545//cell wall modification	K01051//pectinesterase [EC:3.1.1.11]	gi|795881070|ref|NP_001233857.2|//pectinesterase/pectinesterase inhibitor U1 precursor [Solanum lycopersicum]
BGI_novel_G010548	1427	5	2193.68	8.80124	0	Up	0	NA	GO:0005634//nucleus	GO:0043565//sequence-specific DNA binding	GO:0010089//xylem development;GO:0010051//xylem and phloem pattern formation;GO:0006355//regulation of transcription, DNA-templated;GO:0001708//cell fate specification	K16670//homeobox protein Meis2;K15613//homeobox protein Meis1	NP_001233807.2//homeotic protein knotted-1 [Solanum lycopersicum]
543967	1609	10575.3	5007.08	-1.05463	0	Down	0	GSA-AT	GO:0009507//chloroplast	GO:0008483//transaminase activity;GO:0042286//glutamate-1-semialdehyde 2,1-aminomutase activity;GO:0030170//pyridoxal phosphate binding	GO:0006782//protoporphyrinogen IX biosynthetic process;GO:0015995//chlorophyll biosynthetic process	K01845//glutamate-1-semialdehyde 2,1-aminomutase [EC:5.4.3.8]	gi|808688310|ref|NP_001234690.2|//glutamate-1-semialdehyde 2,1-aminomutase, chloroplastic [Solanum lycopersicum]
101258887	1257	5433.11	1735.69	-1.62224	0	Down	0	LOC101258887	NA	NA	NA	K20628//expansin	gi|460400679|ref|XP_004245860.1|//PREDICTED: expansin-like B1 [Solanum lycopersicum]
101259403	4770	0	4361.27	13.1146	0	Up	0	LOC101259403	NA	NA	NA	NA	gi|723672327|ref|XP_010316381.1|//PREDICTED: LOW QUALITY PROTEIN: auxilin-like protein 1 [Solanum lycopersicum]
101261334	2043	1150.47	4237.45	1.90501	0	Up	0	LOC101261334	NA	GO:0010997//anaphase-promoting complex binding;GO:0097027//ubiquitin-protein transferase activator activity	GO:0050790//regulation of catalytic activity	K03363//cell division cycle 20, cofactor of APC complex	gi|460391662|ref|XP_004241439.1|//PREDICTED: cell division cycle 20.2, cofactor of APC complex-like [Solanum lycopersicum]
101250973	7514	5895.55	2016.99	-1.52339	0	Down	0	LOC101250973	NA	NA	NA	K11262//acetyl-CoA carboxylase / biotin carboxylase 1 [EC:6.4.1.2 6.3.4.14]	gi|460414363|ref|XP_004252541.1|//PREDICTED: acetyl-CoA carboxylase 1-like [Solanum lycopersicum]
BGI_novel_G007679	789	2216.36	193.41	-3.49442	0	Down	0	NA	NA	GO:0004867//serine-type endopeptidase inhibitor activity	NA	NA	XP_019068555.1//PREDICTED: proteinase inhibitor type-2-like [Solanum lycopersicum]
101260545	1087	456.95	2825.5	2.65243	0	Up	0	LOC101260545	NA	NA	NA	NA	gi|460392851|ref|XP_004242026.1|//PREDICTED: uncharacterized protein LOC101260545 [Solanum lycopersicum]
101255599	4062	54.88	1787.77	5.04977	0	Up	0	LOC101255599	NA	NA	NA	K03243//translation initiation factor 5B	gi|460391086|ref|XP_004241154.1|//PREDICTED: eukaryotic translation initiation factor 5B-like [Solanum lycopersicum]
BGI_novel_G008729	3438	2658.32	6765.6	1.37174	0	Up	0	NA	GO:0005634//nucleus	GO:0008289//lipid binding;GO:0003677//DNA binding	NA	K09338//homeobox-leucine zipper protein	XP_004235650.1//PREDICTED: homeobox-leucine zipper protein ATHB-15 [Solanum lycopersicum]
BGI_novel_G006915	2386	1140.48	4209.78	1.90814	0	Up	0	NA	NA	GO:0046872//metal ion binding;GO:0030570//pectate lyase activity	GO:0045490//pectin catabolic process	K01728//pectate lyase [EC:4.2.2.2]	XP_016565249.1//PREDICTED: probable pectate lyase 5 isoform X1 [Capsicum annuum]
BGI_novel_G010378	1155	3784.77	8461.6	1.18476	0	Up	0	NA	GO:0015935//small ribosomal subunit	GO:0003723//RNA binding;GO:0003735//structural constituent of ribosome	GO:0006412//translation	K02981//small subunit ribosomal protein S2e	XP_015158851.1//PREDICTED: LOW QUALITY PROTEIN: 40S ribosomal protein S2-3-like [Solanum tuberosum]
101261061	1282	90.02	1864.89	4.39673	0	Up	0	LOC101261061	NA	NA	NA	NA	gi|723730119|ref|XP_004247099.2|//PREDICTED: uncharacterized protein LOC101261061 [Solanum lycopersicum]
BGI_novel_G022788	2086	5684.99	1909.83	-1.54968	0	Down	0	NA	NA	GO:0004489//methylenetetrahydrofolate reductase (NAD(P)H) activity	GO:0006555//methionine metabolic process;GO:0035999//tetrahydrofolate interconversion	K00297//methylenetetrahydrofolate reductase (NADPH) [EC:1.5.1.20]	XP_019264025.1//PREDICTED: methylenetetrahydrofolate reductase 2-like [Nicotiana attenuata]
101265690	986	4174.51	1076.97	-1.9306	0	Down	0	LOC101265690	NA	GO:0046872//metal ion binding;GO:0042409//caffeoyl-CoA O-methyltransferase activity	GO:0009809//lignin biosynthetic process;GO:0032259//methylation	K00588//caffeoyl-CoA O-methyltransferase [EC:2.1.1.104]	gi|460372069|ref|XP_004231856.1|//PREDICTED: caffeoyl-CoA O-methyltransferase [Solanum lycopersicum]
543741	503	3344	7786	1.24334	0	Up	0	TGAS118	NA	NA	GO:0050832//defense response to fungus;GO:0031640//killing of cells of other organism	NA	gi|808688329|ref|NP_001234872.2|//gamma-thionin precursor [Solanum lycopersicum]
101247857	541	14	1809.85	7.03833	0	Up	0	LOC101247857	NA	GO:0004867//serine-type endopeptidase inhibitor activity;GO:0008233//peptidase activity	GO:0009611//response to wounding;GO:0010951//negative regulation of endopeptidase activity	NA	gi|460404373|ref|XP_004247657.1|//PREDICTED: wound-induced proteinase inhibitor 1-like [Solanum lycopersicum]
BGI_novel_G002450	2591	5521	1820	-1.57696	0	Down	0	NA	NA	GO:0043531//ADP binding	GO:0007165//signal transduction	K22038//volume-regulated anion channel;K08852//serine/threonine-protein kinase/endoribonuclease IRE1 [EC:2.7.11.1 3.1.26.-]	XP_010315476.2//PREDICTED: uncharacterized protein LOC101251930 [Solanum lycopersicum]
BGI_novel_G010520	2201	7585.03	3082.54	-1.275	0	Down	0	NA	NA	GO:0050661//NADP binding;GO:0008883//glutamyl-tRNA reductase activity	GO:0006782//protoporphyrinogen IX biosynthetic process	K02492//glutamyl-tRNA reductase [EC:1.2.1.70]	XP_004238036.1//PREDICTED: glutamyl-tRNA reductase 1, chloroplastic [Solanum lycopersicum]
BGI_novel_G016874	2917	5544.67	1849.15	-1.56021	0	Down	0	NA	GO:0016021//integral component of membrane	GO:0008081//phosphoric diester hydrolase activity	GO:0006629//lipid metabolic process	K01126//glycerophosphoryl diester phosphodiesterase [EC:3.1.4.46]	XP_006346174.1//PREDICTED: glycerophosphodiester phosphodiesterase GDPDL4 [Solanum tuberosum]
BGI_novel_G021178	3840	5191.08	1656.2	-1.62412	0	Down	0	NA	NA	GO:0003677//DNA binding;GO:0005516//calmodulin binding	GO:0006950//response to stress	K21989//calcium permeable stress-gated cation channel	XP_004248098.1//PREDICTED: calmodulin-binding protein 60 D-like isoform X1 [Solanum lycopersicum]
543675	1631	4576.1	1316.31	-1.77359	0	Down	0	DES	NA	GO:0016829//lyase activity;GO:0016705//oxidoreductase activity, acting on paired donors, with incorporation or reduction of molecular oxygen;GO:0020037//heme binding;GO:0005506//iron ion binding;GO:0004497//monooxygenase activity	GO:0016125//sterol metabolic process;GO:0055114//oxidation-reduction process	K01723//hydroperoxide dehydratase [EC:4.2.1.92];K17874//9-divinyl ether synthase [EC:4.2.1.121]	gi|350536919|ref|NP_001234527.1|//9-divinyl ether synthase [Solanum lycopersicum]
101256504	2826	1583.99	4918.44	1.65867	0	Up	0	LOC101256504	NA	NA	NA	NA	gi|460398145|ref|XP_004244623.1|//PREDICTED: uncharacterized protein LOC101256504 [Solanum lycopersicum]
BGI_novel_G002926	935	1745.41	5192.3	1.59684	0	Up	0	NA	NA	NA	NA	K15223//upstream activation factor subunit UAF30	NP_001308625.1//SWIB_MDM2 domain protein precursor [Solanum lycopersicum]
BGI_novel_G013145	1770	1949.74	124.64	-3.94341	0	Down	0	NA	NA	GO:0004190//aspartic-type endopeptidase activity	NA	K00924//kinase [EC:2.7.1.-]	XP_006355804.1//PREDICTED: aspartic proteinase Asp1-like isoform X1 [Solanum tuberosum]
101255870	2165	1466.15	4710.21	1.70779	0	Up	0	LOC101255870	NA	NA	NA	K07466//replication factor A1	gi|460380621|ref|XP_004236053.1|//PREDICTED: replication protein A 70 kDa DNA-binding subunit B [Solanum lycopersicum]
BGI_novel_G012304	2543	2506.23	329.49	-2.90318	0	Down	0	NA	GO:0005887//integral component of plasma membrane;GO:0016021//integral component of membrane	GO:0005249//voltage-gated potassium channel activity;GO:0005216//ion channel activity	GO:0042391//regulation of membrane potential	K05391//cyclic nucleotide gated channel, plant	XP_010321519.1//PREDICTED: cyclic nucleotide-gated ion channel 1-like [Solanum lycopersicum]
101265187	1042	8052.85	3430.74	-1.20695	0	Down	0	LOC101265187	NA	GO:0046872//metal ion binding;GO:0042409//caffeoyl-CoA O-methyltransferase activity	GO:0009809//lignin biosynthetic process;GO:0032259//methylation	K00588//caffeoyl-CoA O-methyltransferase [EC:2.1.1.104]	gi|992319616|ref|NP_001307032.1|//caffeoyl-CoA O-methyltransferase-like [Solanum lycopersicum]
101248306	1740	1836.45	87.69	-4.36433	0	Down	0	LOC101248306	NA	GO:0016705//oxidoreductase activity, acting on paired donors, with incorporation or reduction of molecular oxygen;GO:0020037//heme binding;GO:0005506//iron ion binding;GO:0004497//monooxygenase activity	GO:0055114//oxidation-reduction process	K20617//cytochrome P450 family 71 subfamily A	gi|460391230|ref|XP_004241226.1|//PREDICTED: cytochrome P450 71A9-like [Solanum lycopersicum]
BGI_novel_G013430	3098	383.72	2564.66	2.76467	0	Up	0	NA	GO:0005768//endosome;GO:0019898//extrinsic component of membrane	GO:0035091//phosphatidylinositol binding	GO:0016050//vesicle organization;GO:0006897//endocytosis	K17917//sorting nexin-1/2	XP_004240886.1//PREDICTED: sorting nexin 2A [Solanum lycopersicum]
BGI_novel_G020267	1954	1828.57	5298.44	1.55888	0	Up	0	NA	NA	NA	GO:0009908//flower development;GO:0030154//cell differentiation	K20553//5'-3' exoribonuclease 4 [EC:3.1.13.-];K08867//WNK lysine deficient protein kinase [EC:2.7.11.1]	XP_004247354.1//PREDICTED: FRIGIDA-like protein 4a [Solanum lycopersicum]
101244238	1901	2530.79	348.39	-2.83678	0	Down	0	LOC101244238	NA	NA	NA	K03327//multidrug resistance protein, MATE family	gi|460371182|ref|XP_004231422.1|//PREDICTED: protein TRANSPARENT TESTA 12-like [Solanum lycopersicum]
BGI_novel_G004777	2232	8772.74	3935.69	-1.13238	0	Down	0	NA	GO:0016021//integral component of membrane	GO:0004674//protein serine/threonine kinase activity;GO:0005524//ATP binding;GO:0004672//protein kinase activity	NA	K04733//interleukin-1 receptor-associated kinase 4 [EC:2.7.11.1]	XP_010316619.1//PREDICTED: putative receptor-like protein kinase At4g00960 isoform X1 [Solanum lycopersicum]
543914	1063	2844.12	482.5	-2.53535	0	Down	0	XTH3	GO:0048046//apoplast;GO:0005618//cell wall	GO:0004553//hydrolase activity, hydrolyzing O-glycosyl compounds;GO:0016762//xyloglucan:xyloglucosyl transferase activity	GO:0010411//xyloglucan metabolic process;GO:0042546//cell wall biogenesis;GO:0071555//cell wall organization	K08235//xyloglucan:xyloglucosyl transferase [EC:2.4.1.207]	gi|350535843|ref|NP_001234472.1|//xyloglucan endotransglucosylase-hydrolase XTH3 precursor [Solanum lycopersicum]
101251303	795	5417.71	1823.66	-1.54681	0	Down	0	LOC101251303	NA	NA	NA	K19307//25S rRNA (uracil2634-N3)-methyltransferase [EC:2.1.1.313]	gi|460395288|ref|XP_004243216.1|//PREDICTED: uncharacterized protein LOC101251303 [Solanum lycopersicum]
101250097	787	971	3771	1.98144	0	Up	0	LOC101250097	NA	NA	NA	NA	gi|460379240|ref|XP_004235372.1|//PREDICTED: zinc-finger homeodomain protein 7-like [Solanum lycopersicum]
BGI_novel_G000060	1876	2448.46	319.55	-2.91373	0	Down	0	NA	NA	GO:0003677//DNA binding	GO:0050832//defense response to fungus;GO:0006281//DNA repair	K14011//UBX domain-containing protein 6	XP_004228637.1//PREDICTED: plant UBX domain-containing protein 2 [Solanum lycopersicum]
BGI_novel_G002562	1845	149.39	1941.49	3.72404	0	Up	0	NA	NA	GO:0004674//protein serine/threonine kinase activity;GO:0005524//ATP binding	NA	K04733//interleukin-1 receptor-associated kinase 4 [EC:2.7.11.1]	XP_004230467.1//PREDICTED: serine/threonine-protein kinase-like protein At5g23170 [Solanum lycopersicum]
104644839	3714	741.26	3311.25	2.18336	0	Up	0	LOC104644839	NA	NA	NA	K13466//EIX receptor 1/2;K19613//leucine-rich repeat protein SHOC2;K10406//kinesin family member C2/C3	gi|723747984|ref|XP_010313803.1|//PREDICTED: receptor-like protein 12 [Solanum lycopersicum]
101257745	2238	19	1666	6.47828	0	Up	0	LOC101257745	NA	NA	NA	NA	gi|723682427|ref|XP_010318056.1|//PREDICTED: growth-regulating factor 3-like [Solanum lycopersicum]
BGI_novel_G016045	2751	3567.92	827.34	-2.0845	0	Down	0	NA	GO:0005777//peroxisome	NA	NA	K13237//peroxisomal 2,4-dienoyl-CoA reductase [EC:1.3.1.34]	XP_004243555.1//PREDICTED: uncharacterized protein LOC101255117 [Solanum lycopersicum]
101265854	755	3966.74	0	-12.9297	0	Down	0	LOC101265854	NA	NA	NA	K13449//pathogenesis-related protein 1	gi|460402446|ref|XP_004246723.1|//PREDICTED: pathogenesis-related leaf protein 4-like [Solanum lycopersicum]
BGI_novel_G017653	1090	6970.3	2786	-1.29899	0	Down	0	NA	GO:0005634//nucleus	NA	GO:0006355//regulation of transcription, DNA-templated;GO:0009734//auxin-activated signaling pathway;GO:0006351//transcription, DNA-templated	K14484//auxin-responsive protein IAA	NP_001266091.1//IAA29 [Solanum lycopersicum]
BGI_novel_G017065	874	1403.96	4535.5	1.71579	0	Up	0	NA	NA	NA	NA	K11323//histone arginine demethylase JMJD6 [EC:1.14.11.-]	EOY06788.1//Uncharacterized protein TCM_021413 [Theobroma cacao]
BGI_novel_G018672	958	4993.97	1595.68	-1.62198	0	Down	0	NA	NA	NA	NA	K04733//interleukin-1 receptor-associated kinase 4 [EC:2.7.11.1]	NP_001296216.1//osmotin-like protein TPM-1 precursor [Solanum lycopersicum]
BGI_novel_G025357	1668	120.79	1851.5	3.96215	0	Up	0	NA	NA	GO:0004190//aspartic-type endopeptidase activity	GO:0006508//proteolysis;GO:0030163//protein catabolic process	K01379//cathepsin D [EC:3.4.23.5];K02882//large subunit ribosomal protein L18Ae;K06002//pepsin A [EC:3.4.23.1]	XP_004252715.1//PREDICTED: aspartyl protease AED3-like [Solanum lycopersicum]
BGI_novel_G004266	1123	241.39	2179.44	3.19855	0	Up	0	NA	GO:0005840//ribosome;GO:0022627//cytosolic small ribosomal subunit	GO:0003723//RNA binding;GO:0003735//structural constituent of ribosome;GO:0019843//rRNA binding	GO:0006412//translation	K02987//small subunit ribosomal protein S4e	XP_015065059.1//PREDICTED: 40S ribosomal protein S4-like isoform X3 [Solanum pennellii]
BGI_novel_G000003	69313	5201.94	10274.1	1.00592	0	Up	0	NA	NA	NA	NA	K03043//DNA-directed RNA polymerase subunit beta [EC:2.7.7.6]	ADD31189.1//RNA polymerase beta subunit protein (chloroplast) [Ehretia acuminata]
101248548	709	18.48	1652.22	6.50633	0	Up	0	LOC101248548	NA	NA	NA	NA	gi|460376587|ref|XP_004234079.1|//PREDICTED: uncharacterized protein LOC101248548 [Solanum lycopersicum]
BGI_novel_G020993	1459	2479.34	343.67	-2.82683	0	Down	0	NA	NA	NA	NA	K13448//calcium-binding protein CML;K00655//1-acyl-sn-glycerol-3-phosphate acyltransferase [EC:2.3.1.51];K13210//far upstream element-binding protein;K09699//2-oxoisovalerate dehydrogenase E2 component (dihydrolipoyl transacylase) [EC:2.3.1.168]	XP_004248249.1//PREDICTED: multiple organellar RNA editing factor 8, chloroplastic/mitochondrial [Solanum lycopersicum]
101256601	923	1172.82	4105.14	1.83148	0	Up	0	LOC101256601	NA	NA	NA	NA	gi|460393678|ref|XP_004242436.1|//PREDICTED: uncharacterized protein LOC101256601 [Solanum lycopersicum]
BGI_novel_G015711	7859	484.32	2738.11	2.52318	0	Up	0	NA	NA	GO:0016746//transferase activity, transferring acyl groups	NA	K13698//abhydrolase domain-containing protein 4;K13535//cardiolipin-specific phospholipase [EC:3.1.1.-]	XP_004243145.1//PREDICTED: LOW QUALITY PROTEIN: probable 1-acylglycerol-3-phosphate O-acyltransferase [Solanum lycopersicum]
BGI_novel_G002208	1625	2610.36	6470.5	1.33366	0	Up	0	NA	GO:0005737//cytoplasm	GO:0046872//metal ion binding;GO:0046914//transition metal ion binding	GO:0030001//metal ion transport;GO:0046916//cellular transition metal ion homeostasis	K07213//copper chaperone	XP_004230231.1//PREDICTED: heavy metal-associated isoprenylated plant protein 3 [Solanum lycopersicum]
BGI_novel_G014772	1972	2745.32	462.35	-2.54588	0	Down	0	NA	NA	NA	NA	NA	NP_001234635.1//auxin-regulated protein [Solanum lycopersicum]
BGI_novel_G017405	1148	2084.95	5638.56	1.45935	0	Up	0	NA	GO:0005634//nucleus	GO:0000981//RNA polymerase II transcription factor activity, sequence-specific DNA binding;GO:0003677//DNA binding;GO:0043565//sequence-specific DNA binding;GO:0044212//transcription regulatory region DNA binding;GO:0001135//transcription factor activity, RNA polymerase II transcription factor recruiting	GO:0006357//regulation of transcription from RNA polymerase II promoter;GO:0030154//cell differentiation	K09422//transcription factor MYB, plant	XP_004244728.1//PREDICTED: myb-related protein 315-like [Solanum lycopersicum]
101267136	3075	2865.86	517.29	-2.44589	0	Down	0	LOC101267136	NA	NA	NA	K13457//disease resistance protein RPM1	gi|460395720|ref|XP_004243429.1|//PREDICTED: disease resistance RPP13-like protein 4 [Solanum lycopersicum]
101247427	2075	4744.13	1479	-1.65749	0	Down	0	LOC101247427	NA	NA	GO:0006355//regulation of transcription, DNA-templated	K14494//DELLA protein	gi|460388327|ref|XP_004239819.1|//PREDICTED: scarecrow-like protein 13 [Solanum lycopersicum]
BGI_novel_G007842	1383	185.23	1999.76	3.45647	0	Up	0	NA	NA	NA	NA	K08287//dual-specificity kinase [EC:2.7.12.1]	XP_019068574.1//PREDICTED: serine/threonine-protein kinase AFC2 isoform X3 [Solanum lycopersicum]
BGI_novel_G001023	2096	791.91	3361.92	2.10991	0	Up	0	NA	NA	NA	NA	K14319//Ran GTPase-activating protein 1	CCG20300.1//Ran GTPase activating protein 2 [Solanum cardiophyllum]
101262837	5805	3589.2	866.03	-2.02714	0	Down	0	LOC101262837	NA	NA	NA	NA	gi|723720766|ref|XP_010324735.1|//PREDICTED: dedicator of cytokinesis protein 7 [Solanum lycopersicum]
BGI_novel_G019558	1563	2938.64	6949.53	1.2658	0	Up	0	NA	GO:0016021//integral component of membrane;GO:0005886//plasma membrane	NA	GO:0006810//transport	K19996//phosphatidylinositol transfer protein SFH5	XP_004246302.1//PREDICTED: patellin-6 [Solanum lycopersicum]
BGI_novel_G024876	2789	1625.82	37.56	-5.41179	0	Down	0	NA	GO:0005694//chromosome	GO:0003677//DNA binding;GO:0005524//ATP binding;GO:0003918//DNA topoisomerase type II (ATP-hydrolyzing) activity	GO:0006265//DNA topological change	K02470//DNA gyrase subunit B [EC:5.99.1.3]	XP_006355766.1//PREDICTED: DNA gyrase subunit B, chloroplastic/mitochondrial [Solanum tuberosum]
101258916	2263	2057.31	5572.67	1.46164	0	Up	0	LOC101258916	NA	NA	NA	K00423//L-ascorbate oxidase [EC:1.10.3.3]	gi|460410969|ref|XP_004250887.1|//PREDICTED: L-ascorbate oxidase [Solanum lycopersicum]
BGI_novel_G018292	3406	7488.68	3172.11	-1.21524	0	Down	0	NA	GO:0005634//nucleus	GO:0008168//methyltransferase activity	NA	K11446//histone demethylase JARID1 [EC:1.14.11.-]	XP_006352908.1//PREDICTED: lysine-specific demethylase JMJ706 [Solanum tuberosum]
101252730	1914	4733.06	1486.66	-1.64667	0	Down	0	LOC101252730	NA	NA	NA	NA	gi|460406749|ref|XP_004248822.1|//PREDICTED: uncharacterized protein At1g04910-like isoform X1 [Solanum lycopersicum]
BGI_novel_G003240	4124	4784.5	1516.42	-1.63367	0	Down	0	NA	NA	NA	NA	K17964//leucine-rich PPR motif-containing protein, mitochondrial;K17710//pentatricopeptide repeat domain-containing protein 1	XP_004231448.1//PREDICTED: pentatricopeptide repeat-containing protein MRL1, chloroplastic isoform X1 [Solanum lycopersicum]
BGI_novel_G019310	1466	6385.9	2472.32	-1.34499	0	Down	0	NA	NA	GO:0046872//metal ion binding;GO:0016491//oxidoreductase activity	NA	K06892//feruloyl-CoA ortho-hydroxylase [EC:1.14.11.-];K13229//2,4-dihydroxy-1,4-benzoxazin-3-one-glucoside dioxygenase [EC:1.14.20.2]	XP_004246496.1//PREDICTED: 1-aminocyclopropane-1-carboxylate oxidase homolog 1-like [Solanum lycopersicum]
BGI_novel_G016221	3103	3809.14	8211.71	1.13225	0	Up	0	NA	NA	GO:0043531//ADP binding	GO:0006952//defense response	K13457//disease resistance protein RPM1	XP_004243429.1//PREDICTED: disease resistance RPP13-like protein 4 [Solanum lycopersicum]
BGI_novel_G020673	734	6017.5	2250.29	-1.39502	0	Down	0	NA	NA	NA	NA	K12890//splicing factor, arginine/serine-rich 1;K20547//basic endochitinase B [EC:3.2.1.14]	OTG33586.1//hypothetical protein HannXRQ_Chr02g0036351 [Helianthus annuus]
BGI_novel_G014802	1421	1475.89	4580.78	1.65804	0	Up	0	NA	GO:0016020//membrane;GO:0005618//cell wall;GO:0005576//extracellular region	NA	GO:0009664//plant-type cell wall organization	K20628//expansin	NP_001234761.2//expansin18 precursor [Solanum lycopersicum]
BGI_novel_G014570	1380	2431.11	6138.06	1.3602	0	Up	0	NA	NA	GO:0003676//nucleic acid binding	GO:0031047//gene silencing by RNA	K11593//eukaryotic translation initiation factor 2C	XP_009622314.1//PREDICTED: protein argonaute 4-like [Nicotiana tomentosiformis]
544061	730	7398.89	3131	-1.21665	0	Down	0	LOC544061	NA	NA	NA	NA	gi|806638617|ref|NP_001292912.1|//glycine-rich protein isoform 2 precursor [Solanum lycopersicum]
101265448	955	1612	4803	1.59912	0	Up	0	LOC101265448	NA	NA	NA	K13128//zinc finger CCHC domain-containing protein 8	gi|460394151|ref|XP_004242668.1|//PREDICTED: protein GLUTAMINE DUMPER 2 [Solanum lycopersicum]
BGI_novel_G005736	2614	5560.08	1984.18	-1.46253	0	Down	0	NA	GO:0016021//integral component of membrane;GO:0005886//plasma membrane	GO:0004674//protein serine/threonine kinase activity;GO:0005524//ATP binding;GO:0004672//protein kinase activity	GO:0007166//cell surface receptor signaling pathway	K04733//interleukin-1 receptor-associated kinase 4 [EC:2.7.11.1]	NP_001234504.1//wall-associated receptor kinase-like 14 precursor [Solanum lycopersicum]
BGI_novel_G002308	1958	4465.83	9120.95	1.05429	0	Up	0	NA	GO:0032040//small-subunit processome;GO:0031428//box C/D snoRNP complex	GO:0030515//snoRNA binding	GO:0000154//rRNA modification	K14564//nucleolar protein 56	XP_019254229.1//PREDICTED: nucleolar protein 56-like [Nicotiana attenuata]
BGI_novel_G016535	1314	1372.18	4380.27	1.69858	0	Up	0	NA	NA	NA	NA	K10352//myosin heavy chain;K03231//elongation factor 1-alpha;K20478//golgin subfamily B member 1;K09527//DnaJ homolog subfamily C member 7	XP_004243183.1//PREDICTED: interactor of constitutive active ROPs 4 [Solanum lycopersicum]
BGI_novel_G020204	1915	2847	6750.82	1.26965	0	Up	0	NA	NA	GO:0008810//cellulase activity	GO:0030245//cellulose catabolic process	K01179//endoglucanase [EC:3.2.1.4]	XP_019247497.1//PREDICTED: endoglucanase 17 [Nicotiana attenuata]
BGI_novel_G018060	1632	2984.92	601.17	-2.28781	0	Down	0	NA	NA	GO:0016831//carboxy-lyase activity;GO:0030170//pyridoxal phosphate binding	GO:0019752//carboxylic acid metabolic process	K01590//histidine decarboxylase [EC:4.1.1.22]	NP_001233852.2//aromatic amino acid decarboxylase 1B [Solanum lycopersicum]
BGI_novel_G025834	3276	3052.05	7033.61	1.22852	0	Up	0	NA	GO:0005634//nucleus	GO:0008168//methyltransferase activity;GO:0003682//chromatin binding	NA	K00558//DNA (cytosine-5)-methyltransferase 1 [EC:2.1.1.37]	XP_004252840.1//PREDICTED: DNA (cytosine-5)-methyltransferase CMT3 [Solanum lycopersicum]
101258926	1064	2890.42	560.76	-2.34179	0	Down	0	LOC101258926	GO:0048046//apoplast;GO:0005618//cell wall	GO:0004553//hydrolase activity, hydrolyzing O-glycosyl compounds;GO:0016762//xyloglucan:xyloglucosyl transferase activity	GO:0010411//xyloglucan metabolic process;GO:0042546//cell wall biogenesis;GO:0071555//cell wall organization	K08235//xyloglucan:xyloglucosyl transferase [EC:2.4.1.207]	gi|460378804|ref|XP_004235158.1|//PREDICTED: probable xyloglucan endotransglucosylase/hydrolase protein 23 [Solanum lycopersicum]
BGI_novel_G022758	4644	3628.04	0	-12.8009	0	Down	0	NA	NA	GO:0003723//RNA binding;GO:0004525//ribonuclease III activity;GO:0005524//ATP binding	GO:0006396//RNA processing;GO:0031047//gene silencing by RNA	K11592//endoribonuclease Dicer [EC:3.1.26.-]	XP_015166742.1//PREDICTED: endoribonuclease Dicer homolog 2-like [Solanum tuberosum]
101246097	2278	1558.66	25.68	-5.89948	0	Down	0	LOC101246097	NA	NA	NA	K11426//SET and MYND domain-containing protein	gi|460369746|ref|XP_004230718.1|//PREDICTED: uncharacterized protein LOC101246097 [Solanum lycopersicum]
101260225	1524	3099.51	660.95	-2.20539	0	Down	0	LOC101260225	NA	NA	NA	K16815//calcium-independent phospholipase A2-gamma	gi|723695439|ref|XP_010320346.1|//PREDICTED: patatin-like protein 2 isoform X1 [Solanum lycopersicum]
BGI_novel_G008898	2124	8237.5	3725.87	-1.1206	0	Down	0	NA	GO:0005618//cell wall;GO:0071944//cell periphery;GO:0016021//integral component of membrane	GO:0045330//aspartyl esterase activity;GO:0004857//enzyme inhibitor activity;GO:0046910//pectinesterase inhibitor activity;GO:0030599//pectinesterase activity	GO:0045490//pectin catabolic process;GO:0042545//cell wall modification	K01051//pectinesterase [EC:3.1.1.11]	XP_004235526.1//PREDICTED: pectinesterase 3 [Solanum lycopersicum]
101255074	3930	9507.56	4592.41	-1.02579	0	Down	0	AGO1B	NA	GO:0003676//nucleic acid binding	NA	K11593//eukaryotic translation initiation factor 2C	gi|781978756|ref|NP_001266261.2|//Argonaute1B [Solanum lycopersicum]
BGI_novel_G005451	2241	2352.23	330.26	-2.80832	0	Down	0	NA	NA	GO:0020037//heme binding;GO:0004601//peroxidase activity;GO:0051213//dioxygenase activity	GO:0006979//response to oxidative stress	K10529//alpha-dioxygenase [EC:1.-.-.-]	NP_001234410.2//alpha-DOX1 [Solanum lycopersicum]
BGI_novel_G012945	739	8033.26	3590.85	-1.13763	0	Down	0	NA	GO:0016021//integral component of membrane	GO:0005375//copper ion transmembrane transporter activity	NA	K14686//solute carrier family 31 (copper transporter), member 1	XP_004240384.1//PREDICTED: copper transporter 6-like [Solanum lycopersicum]
BGI_novel_G011626	1263	1577.98	47.46	-5.03119	0	Down	0	NA	GO:0005665//DNA-directed RNA polymerase II, core complex	GO:0003899//DNA-directed 5'-3' RNA polymerase activity;GO:0003677//DNA binding;GO:0046983//protein dimerization activity	GO:0006351//transcription, DNA-templated;GO:0006366//transcription from RNA polymerase II promoter	K03011//DNA-directed RNA polymerase II subunit RPB3	XP_004238992.1//PREDICTED: DNA-directed RNA polymerases II, IV and V subunit 3 [Solanum lycopersicum]
543826	871	3741.51	8019.29	1.12389	0	Up	0	CBF1	GO:0005634//nucleus	GO:0003677//DNA binding;GO:0003700//DNA binding transcription factor activity	GO:0006355//regulation of transcription, DNA-templated	K09286//EREBP-like factor	gi|350539177|ref|NP_001234123.1|//CBF1 protein [Solanum lycopersicum]
BGI_novel_G010591	1461	7613.48	3325.05	-1.17115	0	Down	0	NA	NA	NA	NA	K16296//serine carboxypeptidase-like clade I [EC:3.4.16.-]	XP_004238067.1//PREDICTED: uncharacterized protein LOC101252078 [Solanum lycopersicum]
BGI_novel_G024003	3002	263.73	2125.21	3.0345	0	Up	0	NA	GO:0005871//kinesin complex	GO:0005524//ATP binding;GO:0003777//microtubule motor activity;GO:0008017//microtubule binding;GO:0016887//ATPase activity	GO:0007018//microtubule-based movement	K10400//kinesin family member 15	XP_010313480.1//PREDICTED: kinesin-like protein KIN-12E [Solanum lycopersicum]
BGI_novel_G025741	2288	451.53	2565.86	2.53058	0	Up	0	NA	GO:0016021//integral component of membrane	GO:0016491//oxidoreductase activity	NA	K00130//betaine-aldehyde dehydrogenase [EC:1.2.1.8]	XP_016551712.1//PREDICTED: aldehyde dehydrogenase 22A1 [Capsicum annuum]
101250057	1547	30	1514	5.68129	0	Up	0	LOC101250057	NA	NA	NA	K20718//LRR receptor-like serine/threonine-protein kinase ERECTA [EC:2.7.11.1]	gi|460405487|ref|XP_004248207.1|//PREDICTED: protein TOO MANY MOUTHS [Solanum lycopersicum]
101263921	1503	132.21	1771	3.76769	0	Up	0	LOC101263921	NA	NA	NA	K18848//indole-3-acetate O-methyltransferase [EC:2.1.1.278]	gi|460397058|ref|XP_004244085.1|//PREDICTED: indole-3-acetate O-methyltransferase 1 [Solanum lycopersicum]
BGI_novel_G017127	2010	5941.61	2263.46	-1.36829	0	Down	0	NA	NA	GO:0016709//oxidoreductase activity, acting on paired donors, with incorporation or reduction of molecular oxygen, NAD(P)H as one donor, and incorporation of one atom of oxygen;GO:0016705//oxidoreductase activity, acting on paired donors, with incorporation or reduction of molecular oxygen;GO:0020037//heme binding;GO:0005506//iron ion binding;GO:0004497//monooxygenase activity	GO:0010268//brassinosteroid homeostasis;GO:0007275//multicellular organism development;GO:0016132//brassinosteroid biosynthetic process;GO:0016125//sterol metabolic process;GO:0009687//abscisic acid metabolic process	K09843//(+)-abscisic acid 8'-hydroxylase [EC:1.14.13.93]	XP_004244436.1//PREDICTED: abscisic acid 8'-hydroxylase 1 [Solanum lycopersicum]
BGI_novel_G023137	4218	3230.39	736.13	-2.10964	0	Down	0	NA	NA	NA	NA	K13415//protein brassinosteroid insensitive 1 [EC:2.7.10.1 2.7.11.1]	XP_004250582.1//PREDICTED: F-box protein At3g07870-like [Solanum lycopersicum]
101248985	592	452.38	2560.19	2.52468	0	Up	0	LOC101248985	NA	NA	NA	K11251//histone H2A	gi|723711853|ref|XP_004242321.2|//PREDICTED: histone H2AX-like, partial [Solanum lycopersicum]
101258472	894	2578.94	6265.42	1.30467	0	Up	0	LOC101258472	NA	NA	NA	K03006//DNA-directed RNA polymerase II subunit RPB1 [EC:2.7.7.6]	gi|460397023|ref|XP_004244068.1|//PREDICTED: flocculation protein FLO11-like [Solanum lycopersicum]
BGI_novel_G006038	1442	2464.06	6082.83	1.32774	0	Up	0	NA	NA	GO:0046872//metal ion binding;GO:0051213//dioxygenase activity;GO:0016491//oxidoreductase activity	GO:0009267//cellular response to starvation	K05278//flavonol synthase [EC:1.14.11.23];K05933//aminocyclopropanecarboxylate oxidase [EC:1.14.17.4];K06901//putative MFS transporter, AGZA family, xanthine/uracil permease	XP_006339862.1//PREDICTED: uncharacterized protein LOC102577668 isoform X1 [Solanum tuberosum]
BGI_novel_G006488	1949	163.27	1846.58	3.52356	0	Up	0	NA	GO:0016021//integral component of membrane	GO:0015238//drug transmembrane transporter activity;GO:0015297//antiporter activity	NA	K03327//multidrug resistance protein, MATE family	XP_016564541.1//PREDICTED: protein DETOXIFICATION 35-like [Capsicum annuum]
BGI_novel_G025860	3078	4668.29	9290.91	1.01696	0	Up	0	NA	GO:0016021//integral component of membrane	NA	NA	K03046//DNA-directed RNA polymerase subunit beta' [EC:2.7.7.6]	XP_019265682.1//PREDICTED: uncharacterized protein LOC109243218 [Nicotiana attenuata]
BGI_novel_G012402	962	3478.83	7585.84	1.14874	0	Up	0	NA	NA	NA	NA	K11253//histone H3	BAS95979.1//Os06g0130900, partial [Oryza sativa Japonica Group]
101256806	668	4417.6	8923.32	1.03835	0	Up	0	LOC101256806	NA	NA	NA	K11251//histone H2A	gi|460404263|ref|XP_004247603.1|//PREDICTED: probable histone H2AXb [Solanum lycopersicum]
101260290	591	768.93	3193.34	2.07818	0	Up	0	LOC101260290	NA	NA	NA	NA	gi|460372698|ref|XP_004232163.1|//PREDICTED: uncharacterized protein LOC101260290 [Solanum lycopersicum]
101260379	584	402.67	2424.21	2.61388	0	Up	0	LOC101260379	NA	NA	NA	K03006//DNA-directed RNA polymerase II subunit RPB1 [EC:2.7.7.6];K04733//interleukin-1 receptor-associated kinase 4 [EC:2.7.11.1]	gi|460369328|ref|XP_004230515.1|//PREDICTED: basic blue protein-like [Solanum lycopersicum]
101261799	572	1382.66	4306.34	1.66305	0	Up	0	LOC101261799	NA	NA	NA	NA	gi|460380170|ref|XP_004235831.1|//PREDICTED: uncharacterized protein LOC101261799 [Solanum lycopersicum]
101254849	1737	3063.38	668.95	-2.17112	0	Down	0	LOC101254849	NA	NA	NA	K01188//beta-glucosidase [EC:3.2.1.21]	gi|460406763|ref|XP_004248829.1|//PREDICTED: vicianin hydrolase-like [Solanum lycopersicum]
101263750	2169	1681.37	102.4	-4.01332	0	Down	0	LOC101263750	NA	NA	NA	K09571//FK506-binding protein 4/5 [EC:5.2.1.8]	gi|460366805|ref|XP_004229269.1|//PREDICTED: uncharacterized transmembrane protein DDB_G0289901 [Solanum lycopersicum]
101260253	1973	546.38	2717.68	2.33843	0	Up	0	LOC101260253	NA	NA	NA	NA	gi|460400177|ref|XP_004245612.1|//PREDICTED: putative DNA-binding protein ESCAROLA [Solanum lycopersicum]
BGI_novel_G005775	2547	137.22	1742.93	3.69098	0	Up	0	NA	GO:0005634//nucleus;GO:0005886//plasma membrane;GO:0005737//cytoplasm	GO:0005524//ATP binding;GO:0004683//calmodulin-dependent protein kinase activity;GO:0004672//protein kinase activity;GO:0005509//calcium ion binding;GO:0009931//calcium-dependent protein serine/threonine kinase activity;GO:0005516//calmodulin binding	GO:0018105//peptidyl-serine phosphorylation;GO:0009738//abscisic acid-activated signaling pathway;GO:0035556//intracellular signal transduction;GO:0046777//protein autophosphorylation	K00924//kinase [EC:2.7.1.-]	XP_004232048.1//PREDICTED: CDPK-related kinase 5 [Solanum lycopersicum]
101248539	2324	2686.87	502.87	-2.39364	0	Down	0	LOC101248539	NA	NA	NA	K05747//Wiskott-Aldrich syndrome protein;K02184//formin 2	gi|723675033|ref|XP_010316803.1|//PREDICTED: protein CHUP1, chloroplastic [Solanum lycopersicum]
BGI_novel_G014232	1149	177.81	1853.22	3.40566	0	Up	0	NA	GO:0016021//integral component of membrane	GO:0005524//ATP binding;GO:0004672//protein kinase activity	NA	K04733//interleukin-1 receptor-associated kinase 4 [EC:2.7.11.1]	XP_004241646.1//PREDICTED: probable inactive receptor kinase At1g48480 [Solanum lycopersicum]
101251577	1587	4029.13	1184.78	-1.74182	0	Down	0	LOC101251577	NA	NA	NA	K00924//kinase [EC:2.7.1.-];K02882//large subunit ribosomal protein L18Ae;K01381//saccharopepsin [EC:3.4.23.25]	gi|460384572|ref|XP_004237984.1|//PREDICTED: aspartic proteinase nepenthesin-1-like [Solanum lycopersicum]
544000	631	0	3344	12.7314	0	Up	0	TPP3	NA	NA	GO:0050832//defense response to fungus;GO:0031640//killing of cells of other organism	K20727//defensin-like protein 16	gi|460394122|ref|XP_004242654.1|//PREDICTED: defensin-like protein [Solanum lycopersicum]
101244969	1613	331.54	2229	2.77317	0	Up	0	LOC101244969	NA	NA	NA	K04733//interleukin-1 receptor-associated kinase 4 [EC:2.7.11.1]	gi|460395412|ref|XP_004243277.1|//PREDICTED: PTI1-like tyrosine-protein kinase 2 [Solanum lycopersicum]
101248926	1707	269.15	2078.1	2.97282	0	Up	0	LOC101248926	GO:0005634//nucleus	NA	NA	K05868	gi|460407770|ref|XP_004249323.1|//PREDICTED: G2/mitotic-specific cyclin S13-7-like [Solanum lycopersicum]
101261549	4202	4799.73	1625.86	-1.53772	0	Down	0	LOC101261549	GO:0016021//integral component of membrane	GO:0005524//ATP binding;GO:0042626//ATPase activity, coupled to transmembrane movement of substances	GO:0055085//transmembrane transport	K05658//ATP-binding cassette, subfamily B (MDR/TAP), member 1 [EC:3.6.3.44]	gi|460402245|ref|XP_004246624.1|//PREDICTED: ABC transporter B family member 1 [Solanum lycopersicum]
BGI_novel_G016043	1706	2646.18	490.61	-2.40723	0	Down	0	NA	GO:0005777//peroxisome	NA	NA	K13237//peroxisomal 2,4-dienoyl-CoA reductase [EC:1.3.1.34]	XP_004243555.1//PREDICTED: uncharacterized protein LOC101255117 [Solanum lycopersicum]
BGI_novel_G014128	3514	6081.4	2410.02	-1.31133	0	Down	0	NA	NA	GO:0016740//transferase activity	NA	K20792//N-alpha-acetyltransferase 15/16, NatA auxiliary subunit	XP_006356169.1//PREDICTED: N-alpha-acetyltransferase 16, NatA auxiliary subunit-like [Solanum tuberosum]
BGI_novel_G007303	1745	810.51	3224.89	2.01638	0	Up	0	NA	GO:0009506//plasmodesma	GO:0051087//chaperone binding	GO:0006457//protein folding;GO:0043207//response to external biotic stimulus;GO:0009266//response to temperature stimulus	NA	XP_004234927.1//PREDICTED: BAG family molecular chaperone regulator 7 [Solanum lycopersicum]
101263849	4159	1936.27	200.64	-3.24657	0	Down	0	LOC101263849	NA	GO:2001070//starch binding;GO:0005524//ATP binding;GO:0016301//kinase activity	GO:0016310//phosphorylation	K15535//phosphoglucan, water dikinase [EC:2.7.9.5]	gi|460405087|ref|XP_004248008.1|//PREDICTED: phosphoglucan, water dikinase, chloroplastic [Solanum lycopersicum]
101263132	702	3680.15	7793.24	1.10649	0	Up	0	LOC101263132	NA	NA	NA	K08902//photosystem II Psb27 protein	gi|970037930|ref|XP_015080300.1|//PREDICTED: photosystem II repair protein PSB27-H1, chloroplastic [Solanum pennellii]
BGI_novel_G021774	2698	792.22	3183.91	2.03086	0	Up	0	NA	GO:0005783//endoplasmic reticulum;GO:0016021//integral component of membrane;GO:0005886//plasma membrane	GO:0010329//auxin efflux transmembrane transporter activity	GO:0055085//transmembrane transport;GO:0009926//auxin polar transport;GO:0009734//auxin-activated signaling pathway;GO:0010252//auxin homeostasis	K13947//auxin efflux carrier family	NP_001234220.1//auxin efflux facilitator SlPIN9 [Solanum lycopersicum]
BGI_novel_G013489	1553	1483.11	41.43	-5.13777	0	Down	0	NA	NA	GO:0051213//dioxygenase activity	NA	K04125//gibberellin 2-oxidase [EC:1.14.11.13]	XP_004240932.1//PREDICTED: gibberellin 2-beta-dioxygenase 3 [Solanum lycopersicum]
101245796	7147	6070.82	2416.39	-1.30501	0	Down	0	LOC101245796	GO:0005634//nucleus;GO:0005829//cytosol	GO:0005524//ATP binding;GO:0003682//chromatin binding;GO:0008094//DNA-dependent ATPase activity	GO:0040029//regulation of gene expression, epigenetic;GO:0006355//regulation of transcription, DNA-templated;GO:0043044//ATP-dependent chromatin remodeling;GO:0010199//organ boundary specification between lateral organs and the meristem	K11647//SWI/SNF-related matrix-associated actin-dependent regulator of chromatin subfamily A member 2/4 [EC:3.6.4.-]	gi|723661194|ref|XP_010326507.1|//PREDICTED: ATP-dependent helicase BRM [Solanum lycopersicum]
101251862	2502	1515.64	4466.19	1.58315	0	Up	0	LOC101251862	NA	NA	NA	K04733//interleukin-1 receptor-associated kinase 4 [EC:2.7.11.1]	gi|460378371|ref|XP_004234946.1|//PREDICTED: LRR receptor-like serine/threonine-protein kinase GSO1 [Solanum lycopersicum]
BGI_novel_G017580	861	2192.89	304.49	-2.82433	0	Down	0	NA	NA	NA	NA	NA	XP_010315036.1//PREDICTED: putative glycine-rich cell wall structural protein 1, partial [Solanum lycopersicum]
BGI_novel_G003869	873	599.42	2792	2.24369	0	Up	0	NA	NA	NA	GO:0048367//shoot system development	NA	XP_010317140.1//PREDICTED: uncharacterized protein LOC104645948 [Solanum lycopersicum]
BGI_novel_G002821	3982	1684.15	4735.54	1.51554	0	Up	0	NA	NA	GO:0003887//DNA-directed DNA polymerase activity;GO:0003677//DNA binding	GO:0006351//transcription, DNA-templated	K02331//DNA polymerase phi [EC:2.7.7.7]	XP_016539372.1//PREDICTED: DNA polymerase V [Capsicum annuum]
101264401	677	1543.76	4500.35	1.56762	0	Up	0	LOC101264401	GO:0009506//plasmodesma;GO:0009579//thylakoid;GO:0005774//vacuolar membrane;GO:0005730//nucleolus;GO:0005829//cytosol;GO:0005886//plasma membrane;GO:0000786//nucleosome;GO:0009507//chloroplast	GO:0003677//DNA binding;GO:0046982//protein heterodimerization activity	GO:0006334//nucleosome assembly	K11254//histone H4	gi|195617694|gb|ACG30677.1|//histone H4 [Zea mays]
BGI_novel_G004780	2880	3842.33	1106.31	-1.77219	0	Down	0	NA	GO:0016021//integral component of membrane;GO:0005886//plasma membrane	GO:0004674//protein serine/threonine kinase activity;GO:0005524//ATP binding	GO:0006468//protein phosphorylation	K04733//interleukin-1 receptor-associated kinase 4 [EC:2.7.11.1]	XP_004232751.1//PREDICTED: putative receptor-like protein kinase At4g00960 [Solanum lycopersicum]
101255938	2936	1452.66	19.32	-6.20843	0	Down	0	LOC101255938	NA	NA	NA	K17964//leucine-rich PPR motif-containing protein, mitochondrial	gi|460372004|ref|XP_004231824.1|//PREDICTED: pentatricopeptide repeat-containing protein At3g46610 [Solanum lycopersicum]
101246876	1745	3893.1	1136.82	-1.75188	0	Down	0	LOC101246876	NA	NA	NA	K03320//ammonium transporter, Amt family	gi|460407252|ref|XP_004249068.1|//PREDICTED: ammonium transporter 2 [Solanum lycopersicum]
BGI_novel_G017135	1115	5455.13	2047.67	-1.3896	0	Down	0	NA	GO:0005829//cytosol;GO:0009507//chloroplast	GO:0016765//transferase activity, transferring alkyl or aryl (other than methyl) groups;GO:0046872//metal ion binding;GO:0002094//polyprenyltransferase activity;GO:0047863//dimethylallylcistransferase activity	GO:0016094//polyprenol biosynthetic process	K18114//dimethylallylcistransferase [EC:2.5.1.28];K11778//ditrans,polycis-polyprenyl diphosphate synthase [EC:2.5.1.87]	NP_001234633.1//dimethylallylcistransferase, chloroplastic [Solanum lycopersicum]
101265426	1425	7038.15	3063.33	-1.17606	0	Down	0	LOC101265426	NA	NA	NA	K06892//feruloyl-CoA ortho-hydroxylase [EC:1.14.11.-];K13229//2,4-dihydroxy-1,4-benzoxazin-3-one-glucoside dioxygenase [EC:1.14.20.2]	gi|460382410|ref|XP_004236932.1|//PREDICTED: 1-aminocyclopropane-1-carboxylate oxidase homolog 4-like [Solanum lycopersicum]
BGI_novel_G006834	1776	67.62	1492.8	4.48846	0	Up	0	NA	NA	GO:0004553//hydrolase activity, hydrolyzing O-glycosyl compounds	GO:0005975//carbohydrate metabolic process	K19892//glucan endo-1,3-beta-glucosidase 4 [EC:3.2.1.39];K19891//glucan endo-1,3-beta-glucosidase 1/2/3 [EC:3.2.1.39]	XP_004234651.1//PREDICTED: glucan endo-1,3-beta-glucosidase 12 [Solanum lycopersicum]
104645908	895	442.18	2431.63	2.48325	0	Up	0	LOC104645908	GO:0005622//intracellular	NA	GO:0007034//vacuolar transport	K12191//charged multivesicular body protein 2A	gi|565372920|ref|XP_006353033.1|//PREDICTED: vacuolar protein sorting-associated protein 2 homolog 2 [Solanum tuberosum]
101268864	2275	84	1537.47	4.21806	0	Up	0	LOC101268864	NA	NA	NA	K04730//interleukin-1 receptor-associated kinase 1 [EC:2.7.11.1];K13420//LRR receptor-like serine/threonine-protein kinase FLS2 [EC:2.7.11.1]	gi|460386580|ref|XP_004238976.1|//PREDICTED: piriformospora indica-insensitive protein 2-like [Solanum lycopersicum]
101260787	1793	1640.62	109.55	-3.88055	0	Down	0	LOC101260787	NA	NA	NA	K01051//pectinesterase [EC:3.1.1.11]	gi|723673987|ref|XP_010316615.1|//PREDICTED: pectinesterase-like [Solanum lycopersicum]
101264464	2331	7369.42	3295.26	-1.13713	0	Down	0	LOC101264464	NA	NA	NA	K01183//chitinase [EC:3.2.1.14];K14638//solute carrier family 15 (peptide/histidine transporter), member 3/4	gi|460405091|ref|XP_004248010.1|//PREDICTED: MACPF domain-containing protein At4g24290-like [Solanum lycopersicum]
BGI_novel_G025515	2743	667.56	2894.75	2.1405	0	Up	0	NA	GO:0005886//plasma membrane	NA	NA	NA	XP_004253111.1//PREDICTED: uncharacterized protein At1g76660 isoform X1 [Solanum lycopersicum]
BGI_novel_G010823	1976	1113.56	3725.3	1.76621	0	Up	0	NA	NA	GO:0004553//hydrolase activity, hydrolyzing O-glycosyl compounds	GO:0005975//carbohydrate metabolic process	K19891//glucan endo-1,3-beta-glucosidase 1/2/3 [EC:3.2.1.39]	XP_004238250.1//PREDICTED: glucan endo-1,3-beta-glucosidase 7 [Solanum lycopersicum]
543769	1270	1660.38	4654.15	1.51104	0	Up	0	cdkB2	NA	GO:0004674//protein serine/threonine kinase activity;GO:0005524//ATP binding	GO:0006468//protein phosphorylation	K07760//cyclin-dependent kinase [EC:2.7.11.22]	gi|350534814|ref|NP_001233905.1|//B2-type cyclin dependent kinase [Solanum lycopersicum]
BGI_novel_G011486	1018	2466	5920	1.28746	0	Up	0	NA	NA	NA	NA	NA	OIT18991.1//putative non-specific lipid-transfer protein akcs9 [Nicotiana attenuata]
BGI_novel_G024983	1123	6795.9	2927.3	-1.19106	0	Down	0	NA	NA	GO:0016491//oxidoreductase activity	NA	K00059//3-oxoacyl-[acyl-carrier protein] reductase [EC:1.1.1.100]	XP_010314314.1//PREDICTED: uncharacterized protein LOC101255178 [Solanum lycopersicum]
101258163	3255	3193.27	786.75	-1.99702	0	Down	0	LOC101258163	NA	NA	NA	K12309//beta-galactosidase [EC:3.2.1.23]	gi|460392491|ref|XP_004241849.1|//PREDICTED: beta-galactosidase-like [Solanum lycopersicum]
BGI_novel_G008306	1503	2131.16	299.02	-2.80929	0	Down	0	NA	GO:0005634//nucleus	GO:0043565//sequence-specific DNA binding;GO:0044212//transcription regulatory region DNA binding;GO:0003700//DNA binding transcription factor activity	GO:0009611//response to wounding;GO:0045892//negative regulation of transcription, DNA-templated;GO:0050832//defense response to fungus;GO:0006351//transcription, DNA-templated;GO:0042742//defense response to bacterium;GO:0002237//response to molecule of bacterial origin;GO:0009751//response to salicylic acid;GO:0010200//response to chitin;GO:0031347//regulation of defense response	K13424//WRKY transcription factor 33	NP_001303844.1//probable WRKY transcription factor 40 [Solanum lycopersicum]
BGI_novel_G011919	5124	4152.31	8361.97	1.03396	0	Up	0	NA	GO:0016021//integral component of membrane	GO:0005524//ATP binding;GO:0042626//ATPase activity, coupled to transmembrane movement of substances	NA	K05666//ATP-binding cassette, subfamily C (CFTR/MRP), member 2	XP_004239178.1//PREDICTED: putative ABC transporter C family member 15 [Solanum lycopersicum]
BGI_novel_G021734	1367	1668.67	4650.89	1.50284	0	Up	0	NA	NA	GO:0003723//RNA binding	NA	NA	XP_004249088.1//PREDICTED: binding partner of ACD11 1 [Solanum lycopersicum]
BGI_novel_G012578	488	3051.54	723.23	-2.05298	0	Down	0	NA	GO:0016021//integral component of membrane;GO:0005886//plasma membrane	GO:0005524//ATP binding;GO:0042626//ATPase activity, coupled to transmembrane movement of substances	NA	NA	XP_015076370.1//PREDICTED: pleiotropic drug resistance protein 1-like [Solanum pennellii]
101267530	1221	5332.42	2019.69	-1.37662	0	Down	0	LOC101267530	NA	NA	NA	NA	gi|460390572|ref|XP_004240903.1|//PREDICTED: protein LURP-one-related 14-like [Solanum lycopersicum]
101244210	1853	6657.86	2865.38	-1.1923	0	Down	0	LOC101244210	GO:0005887//integral component of plasma membrane;GO:0016328//lateral plasma membrane	GO:0015250//water channel activity;GO:0015105//arsenite transmembrane transporter activity;GO:0015254//glycerol channel activity;GO:0080138	GO:0006833//water transport;GO:0046685//response to arsenic-containing substance;GO:0009992//cellular water homeostasis;GO:0015700//arsenite transport;GO:0015793//glycerol transport;GO:0010036//response to boron-containing substance;GO:0035445//borate transmembrane transport	K09874//aquaporin NIP	gi|565324206|ref|NP_001274288.1|//probable aquaporin NIP5-1-like [Solanum lycopersicum]
100316882	4049	1628.49	118.05	-3.76203	0	Down	0	LOC100316882	NA	GO:2001070//starch binding;GO:0004373//glycogen (starch) synthase activity	NA	K00703//starch synthase [EC:2.4.1.21]	gi|350538959|ref|NP_001234623.1|//starch synthase III [Solanum lycopersicum]
BGI_novel_G021056	605	4282.68	1396.29	-1.59288	0	Down	0	NA	NA	NA	NA	NA	XP_004248202.1//PREDICTED: uncharacterized protein LOC101248720 [Solanum lycopersicum]
101254764	1896	1672	4628	1.49285	0	Up	0	LOC101254764	NA	NA	NA	NA	gi|460412981|ref|XP_004251874.1|//PREDICTED: uncharacterized protein LOC101254764 [Solanum lycopersicum]
101246301	1249	8221.17	3921.85	-1.04378	0	Down	0	LOC101246301	NA	NA	NA	K19476//vacuolar protein sorting-associated protein IST1	gi|460373115|ref|XP_004232368.1|//PREDICTED: IST1 homolog [Solanum lycopersicum]
BGI_novel_G003112	3782	3787.77	7801.91	1.06651	0	Up	0	NA	GO:0005886//plasma membrane	NA	GO:0007186//G-protein coupled receptor signaling pathway;GO:0007165//signal transduction	K04536//guanine nucleotide-binding protein G(I)/G(S)/G(T) subunit beta-1	XP_004230907.1//PREDICTED: guanine nucleotide-binding protein subunit beta [Solanum lycopersicum]
101264044	753	1977.28	5111.85	1.39436	0	Up	0	LOC101264044	NA	NA	NA	K00962//polyribonucleotide nucleotidyltransferase [EC:2.7.7.8]	gi|460400203|ref|XP_004245625.1|//PREDICTED: selenoprotein H-like [Solanum lycopersicum]
BGI_novel_G004253	1154	634.54	2781.32	2.15602	0	Up	0	NA	GO:0005840//ribosome;GO:0022627//cytosolic small ribosomal subunit	GO:0003723//RNA binding;GO:0003735//structural constituent of ribosome;GO:0019843//rRNA binding	GO:0006412//translation	K02987//small subunit ribosomal protein S4e	XP_010316939.1//PREDICTED: 40S ribosomal protein S4 [Solanum lycopersicum]
BGI_novel_G012461	1240	2902.74	662.39	-2.10763	0	Down	0	NA	GO:0005576//extracellular region	GO:0046872//metal ion binding;GO:0020037//heme binding;GO:0004601//peroxidase activity	GO:0006979//response to oxidative stress;GO:0042744//hydrogen peroxide catabolic process	K00430//peroxidase [EC:1.11.1.7]	XP_004239964.1//PREDICTED: peroxidase P7 [Solanum lycopersicum]
BGI_novel_G010453	5202	958.68	3388.61	1.84561	0	Up	0	NA	GO:0005634//nucleus	GO:0042393//histone binding;GO:0005524//ATP binding;GO:0003682//chromatin binding;GO:0016887//ATPase activity	GO:0045944//positive regulation of transcription from RNA polymerase II promoter;GO:0031936//negative regulation of chromatin silencing	K13525//transitional endoplasmic reticulum ATPase	XP_004237983.1//PREDICTED: ATPase family AAA domain-containing protein At1g05910 [Solanum lycopersicum]
100316883	2337	2316.36	392.68	-2.5364	0	Down	0	PHS1	GO:0009507//chloroplast	GO:0000287//magnesium ion binding;GO:0010333//terpene synthase activity	GO:0043693//monoterpene biosynthetic process	K18116//beta-phellandrene synthase (neryl-diphosphate-cyclizing) [EC:4.2.3.51];K04121//ent-kaurene synthase [EC:4.2.3.19]	gi|350539079|ref|NP_001234629.1|//beta-phellandrene synthase (neryl-diphosphate-cyclizing), chloroplastic [Solanum lycopersicum]
BGI_novel_G015581	6191	1372.29	25.96	-5.70012	0	Down	0	NA	GO:0010008//endosome membrane;GO:0005829//cytosol	GO:0046872//metal ion binding;GO:0000285//1-phosphatidylinositol-3-phosphate 5-kinase activity;GO:0005524//ATP binding	GO:0010256//endomembrane system organization;GO:0007033//vacuole organization;GO:0042147//retrograde transport, endosome to Golgi;GO:0046854//phosphatidylinositol phosphorylation	K00921//1-phosphatidylinositol-3-phosphate 5-kinase [EC:2.7.1.150]	XP_010323385.1//PREDICTED: 1-phosphatidylinositol-3-phosphate 5-kinase FAB1B [Solanum lycopersicum]
BGI_novel_G014726	3919	2465.72	460.97	-2.39523	0	Down	0	NA	GO:0016021//integral component of membrane	GO:0046872//metal ion binding;GO:0005524//ATP binding	GO:0006807//nitrogen compound metabolic process	K01955//carbamoyl-phosphate synthase large subunit [EC:6.3.5.5]	XP_019227599.1//PREDICTED: carbamoyl-phosphate synthase large chain, chloroplastic [Nicotiana attenuata]
101263722	1924	4022.54	1263.34	-1.64683	0	Down	0	LOC101263722	NA	NA	NA	K10956//protein transport protein SEC61 subunit alpha	gi|460394140|ref|XP_004242663.1|//PREDICTED: preprotein translocase subunit SCY1, chloroplastic [Solanum lycopersicum]
101264880	2606	6755.27	2952.58	-1.17	0	Down	0	LOC101264880	NA	NA	NA	K20867//galacturonosyltransferase 12/13/14/15 [EC:2.4.1.-]	gi|460372727|ref|XP_004232177.1|//PREDICTED: probable galacturonosyltransferase 14 [Solanum lycopersicum]
BGI_novel_G015481	2327	5234.87	1983.92	-1.37577	0	Down	0	NA	NA	GO:0046872//metal ion binding;GO:0003993//acid phosphatase activity	NA	K14407//cleavage stimulation factor subunit 2	XP_015082561.1//PREDICTED: probable inactive purple acid phosphatase 27 [Solanum pennellii]
BGI_novel_G004841	1388	1626.09	4521.49	1.49942	0	Up	0	NA	NA	GO:0004462//lactoylglutathione lyase activity;GO:0046872//metal ion binding;GO:0016151//nickel cation binding;GO:0019863//IgE binding	GO:0006979//response to oxidative stress;GO:0009651//response to salt stress;GO:0019243//methylglyoxal catabolic process to D-lactate via S-lactoyl-glutathione	K01759//lactoylglutathione lyase [EC:4.4.1.5]	XP_004232705.1//PREDICTED: putative lactoylglutathione lyase [Solanum lycopersicum]
BGI_novel_G012837	2207	3517.65	7374.15	1.0919	0	Up	0	NA	GO:0005737//cytoplasm	GO:0005524//ATP binding;GO:0051082//unfolded protein binding	GO:0006457//protein folding	K09495//T-complex protein 1 subunit gamma	XP_015076363.1//PREDICTED: T-complex protein 1 subunit gamma [Solanum pennellii]
BGI_novel_G009561	2978	557.2	2596.18	2.24416	0	Up	0	NA	NA	GO:0016307//phosphatidylinositol phosphate kinase activity;GO:0005524//ATP binding;GO:0016308//1-phosphatidylinositol-4-phosphate 5-kinase activity	NA	K00889//1-phosphatidylinositol-4-phosphate 5-kinase [EC:2.7.1.68]	XP_010319199.1//PREDICTED: phosphatidylinositol 4-phosphate 5-kinase 1-like [Solanum lycopersicum]
BGI_novel_G015436	974	5867.51	2394.44	-1.26903	0	Down	0	NA	NA	GO:0009055//electron transfer activity	NA	K01179//endoglucanase [EC:3.2.1.4];K05740//diaphanous 1	XP_016579956.1//PREDICTED: cucumber peeling cupredoxin-like [Capsicum annuum]
101252440	2194	8336.11	4045.61	-1.01898	0	Down	0	LOC101252440	NA	NA	NA	K02492//glutamyl-tRNA reductase [EC:1.2.1.70]	gi|460369612|ref|XP_004230651.1|//PREDICTED: glutamyl-tRNA reductase 1, chloroplastic-like [Solanum lycopersicum]
101245708	1813	834.76	3130.56	1.93102	0	Up	0	LOC101245708	NA	NA	NA	NA	gi|460407411|ref|XP_004249146.1|//PREDICTED: patatin-like protein 3 [Solanum lycopersicum]
BGI_novel_G001808	1585	1287.68	3936.05	1.63601	0	Up	0	NA	GO:0005730//nucleolus;GO:0000176//nuclear exosome (RNase complex);GO:0000177//cytoplasmic exosome (RNase complex)	NA	GO:0031125//rRNA 3'-end processing;GO:0016075//rRNA catabolic process;GO:0034427//nuclear-transcribed mRNA catabolic process, exonucleolytic, 3'-5';GO:0071051//polyadenylation-dependent snoRNA 3'-end processing;GO:0071028//nuclear mRNA surveillance;GO:0034475//U4 snRNA 3'-end processing	K11600//exosome complex component RRP41	XP_004229977.1//PREDICTED: exosome complex component RRP41 homolog [Solanum lycopersicum]
101260139	1086	1446.38	4201.97	1.56265	0	Up	0	LOC101260139	NA	NA	NA	K11275//histone H1/5	gi|460388757|ref|XP_004240031.1|//PREDICTED: HMG-Y-related protein B-like [Solanum lycopersicum]
101252685	2444	130.9	1590.31	3.6268	0	Up	0	LOC101252685	NA	NA	NA	NA	gi|460385964|ref|XP_004238670.1|//PREDICTED: uncharacterized protein LOC101252685 [Solanum lycopersicum]
101247829	2503	1544.27	4356.83	1.52039	0	Up	0	LOC101247829	NA	NA	NA	K11723	gi|460390608|ref|XP_004240920.1|//PREDICTED: uncharacterized protein LOC101247829 [Solanum lycopersicum]
101257365	1072	296.46	2010.76	2.78586	0	Up	0	LOC101257365	NA	NA	NA	NA	gi|460384943|ref|XP_004238166.1|//PREDICTED: B3 domain-containing protein At5g42700 [Solanum lycopersicum]
101255058	1889	3011.79	738.66	-2.00361	0	Down	0	LOC101255058	NA	NA	NA	K13207//CUG-BP- and ETR3-like factor;K00161//pyruvate dehydrogenase E1 component alpha subunit [EC:1.2.4.1]	gi|460375214|ref|XP_004233402.1|//PREDICTED: protein FLX-like 2 [Solanum lycopersicum]
101266188	1696	3747.35	7662.78	1.05603	0	Up	0	LOC101266188	NA	NA	NA	K01285//lysosomal Pro-X carboxypeptidase [EC:3.4.16.2]	gi|460411184|ref|XP_004250994.1|//PREDICTED: lysosomal Pro-X carboxypeptidase-like [Solanum lycopersicum]
BGI_novel_G000384	1745	936.81	3302.06	1.84157	0	Up	0	NA	GO:0005634//nucleus	NA	NA	K21777//G2/mitotic-specific cyclin-B, other	XP_010313160.1//PREDICTED: G2/mitotic-specific cyclin S13-7-like [Solanum lycopersicum]
BGI_novel_G020223	3922	938.04	3302	1.83965	0	Up	0	NA	GO:0005794//Golgi apparatus;GO:0016021//integral component of membrane	GO:0016760//cellulose synthase (UDP-forming) activity;GO:0051753//mannan synthase activity	GO:0000919//cell plate assembly;GO:0009414//response to water deprivation;GO:0009651//response to salt stress;GO:0030244//cellulose biosynthetic process;GO:0071669//plant-type cell wall organization or biogenesis;GO:0071555//cell wall organization;GO:0048367//shoot system development	K00770//1,4-beta-D-xylan synthase [EC:2.4.2.24]	XP_004247387.1//PREDICTED: cellulose synthase-like protein D5 [Solanum lycopersicum]
BGI_novel_G022282	1742	2382.23	5663.31	1.27337	0	Up	0	NA	NA	NA	NA	NA	XP_004249549.1//PREDICTED: uncharacterized protein LOC101266378 [Solanum lycopersicum]
BGI_novel_G008906	2554	2438.44	469.99	-2.35122	0	Down	0	NA	GO:0016021//integral component of membrane	GO:0061630//ubiquitin protein ligase activity	GO:0043161//proteasome-mediated ubiquitin-dependent protein catabolic process	K15692//E3 ubiquitin-protein ligase RNF13 [EC:2.3.2.27];K19041//E3 ubiquitin-protein ligase RNF38/44 [EC:2.3.2.27];K16286//E3 ubiquitin-protein ligase EL5 [EC:2.3.2.27]	XP_004235522.1//PREDICTED: RING-H2 finger protein ATL3-like [Solanum lycopersicum]
101263961	2221	3845.96	1196.57	-1.66041	0	Down	0	LOC101263961	NA	NA	NA	K04733//interleukin-1 receptor-associated kinase 4 [EC:2.7.11.1]	gi|460373061|ref|XP_004232341.1|//PREDICTED: probable receptor-like protein kinase At1g67000 [Solanum lycopersicum]
101265986	1826	1556.07	115.01	-3.73404	0	Down	0	LOC101265986	NA	NA	NA	K03327//multidrug resistance protein, MATE family	gi|460409403|ref|XP_004250128.1|//PREDICTED: protein TRANSPARENT TESTA 12-like [Solanum lycopersicum]
101264987	584	669.16	2780.97	2.0792	0	Up	0	LOC101264987	NA	NA	NA	K11252//histone H2B	gi|460371624|ref|XP_004231635.1|//PREDICTED: histone H2B-like [Solanum lycopersicum]
101257732	1566	3170.65	834.69	-1.90143	0	Down	0	LOC101257732	NA	NA	NA	K04733//interleukin-1 receptor-associated kinase 4 [EC:2.7.11.1]	gi|460410963|ref|XP_004250884.1|//PREDICTED: protein kinase 2B, chloroplastic isoform X1 [Solanum lycopersicum]
BGI_novel_G020199	912	1444.47	6.74	-7.71954	0	Down	0	NA	GO:0005840//ribosome;GO:0022625//cytosolic large ribosomal subunit	GO:0003723//RNA binding;GO:0003735//structural constituent of ribosome	GO:0006412//translation	K02883//large subunit ribosomal protein L18e	XP_004247404.1//PREDICTED: 60S ribosomal protein L18-2 [Solanum lycopersicum]
101255511	1781	224.79	1811	3.03417	0	Up	0	LOC101255511	NA	NA	NA	NA	gi|460396307|ref|XP_004243717.1|//PREDICTED: growth-regulating factor 1-like [Solanum lycopersicum]
101268806	2619	8199.35	3999.31	-1.01173	0	Down	0	LOC101268806	NA	NA	NA	K04733//interleukin-1 receptor-associated kinase 4 [EC:2.7.11.1]	gi|460405268|ref|XP_004248098.1|//PREDICTED: uncharacterized protein LOC101268806 isoform X1 [Solanum lycopersicum]
BGI_novel_G010708	1123	82.54	1425.24	4.134	0	Up	0	NA	GO:0005634//nucleus	GO:0003677//DNA binding	GO:0006355//regulation of transcription, DNA-templated;GO:0006351//transcription, DNA-templated	NA	XP_004238166.1//PREDICTED: B3 domain-containing protein At5g42700 [Solanum lycopersicum]
101245896	1809	3670.82	7508.31	1.05642	4.90979e-307	Up	4.70981e-308	LOC101245896	NA	NA	NA	K07428//cytochrome P450 family 4 subfamily X [EC:1.14.14.1]	gi|460406567|ref|XP_004248734.1|//PREDICTED: cytochrome P450 CYP72A219 [Solanum lycopersicum]
BGI_novel_G022554	1102	161.69	1644.42	3.37031	6.26795e-307	Up	6.01923e-308	NA	NA	GO:0003713//transcription coactivator activity	GO:0009955//adaxial/abaxial pattern specification;GO:0008283//cell proliferation;GO:0048366//leaf development	NA	XP_004249920.1//PREDICTED: GRF1-interacting factor 1 [Solanum lycopersicum]
101264868	6499	7325.4	3400.2	-1.08325	6.73716e-307	Down	6.47689e-308	LOC101264868	NA	NA	NA	K10590//E3 ubiquitin-protein ligase TRIP12 [EC:2.3.2.26]	gi|460370393|ref|XP_004231037.1|//PREDICTED: E3 ubiquitin-protein ligase UPL3 [Solanum lycopersicum]
101253841	3287	6588.04	2912.2	-1.15371	1.57821e-305	Down	1.52055e-306	LOC101253841	NA	GO:2001070//starch binding;GO:0004134//4-alpha-glucanotransferase activity	GO:0005977//glycogen metabolic process	K00705//4-alpha-glucanotransferase [EC:2.4.1.25]	gi|723667549|ref|XP_010315588.1|//PREDICTED: 4-alpha-glucanotransferase DPE2 [Solanum lycopersicum]
BGI_novel_G005686	2659	6749.79	3023.01	-1.13482	7.37807e-305	Down	7.11624e-306	NA	GO:0005768//endosome;GO:0016021//integral component of membrane;GO:0005802//trans-Golgi network;GO:0005886//plasma membrane	GO:0016740//transferase activity;GO:0042803//protein homodimerization activity	NA	K20887//xyloglucan glycosyltransferase 4 [EC:2.4.1.-]	NP_001316710.1//cellulose-synthase-like [Solanum lycopersicum]
101266252	2390	18.35	1285.4	6.15433	7.81406e-305	Up	7.54495e-306	LOC101266252	NA	NA	NA	K01590//histidine decarboxylase [EC:4.1.1.22]	gi|460365421|ref|XP_004228601.1|//PREDICTED: protein downstream neighbor of son homolog [Solanum lycopersicum]
101266922	1148	1453.17	4152.18	1.5387	8.97592e-305	Up	8.69503e-306	LOC101266922	NA	NA	NA	K11290//template-activating factor I	gi|460380529|ref|XP_004236008.1|//PREDICTED: NAP1-related protein 2-like [Solanum lycopersicum]
101266618	1545	3221.06	870.99	-1.86277	1.40505e-304	Down	1.36255e-305	LOC101266618	GO:0016021//integral component of membrane	GO:0016705//oxidoreductase activity, acting on paired donors, with incorporation or reduction of molecular oxygen;GO:0020037//heme binding;GO:0005506//iron ion binding;GO:0004497//monooxygenase activity	GO:0055114//oxidation-reduction process	K05280//flavonoid 3'-monooxygenase [EC:1.14.13.21]	gi|726965361|ref|NP_001289844.1|//flavonoid 3'-monooxygenase [Solanum lycopersicum]
BGI_novel_G017508	5824	1815.98	4735.8	1.40689	3.39022e-304	Up	3.29124e-305	NA	GO:0005622//intracellular	GO:0005085//guanyl-nucleotide exchange factor activity	GO:0007264//small GTPase mediated signal transduction	K21852//dedicator of cytokinesis protein 6/7/8	XP_010324735.1//PREDICTED: guanine nucleotide exchange factor SPIKE 1 [Solanum lycopersicum]
BGI_novel_G005930	2977	2357.93	5572.29	1.26478	7.06093e-304	Up	6.86958e-305	NA	NA	GO:0052654//L-leucine transaminase activity;GO:0052656//L-isoleucine transaminase activity;GO:0052655//L-valine transaminase activity	GO:0009082//branched-chain amino acid biosynthetic process	K00826//branched-chain amino acid aminotransferase [EC:2.6.1.42]	XP_016560903.1//PREDICTED: branched-chain-amino-acid aminotransferase 3, chloroplastic-like [Capsicum annuum]
101255427	2351	14.73	1293.39	6.48029	9.24533e-304	Up	9.01417e-305	LOC101255427	GO:0005874//microtubule;GO:0005871//kinesin complex;GO:0009507//chloroplast	GO:0005524//ATP binding;GO:0003777//microtubule motor activity;GO:0008017//microtubule binding;GO:0016887//ATPase activity	GO:0007018//microtubule-based movement	K10403//kinesin family member 22	gi|460402749|ref|XP_004246873.1|//PREDICTED: kinesin-like protein KIF22 [Solanum lycopersicum]
101265346	2550	891.36	3171.97	1.85533	2.47664e-303	Up	2.41991e-304	LOC101265346	NA	NA	NA	K20720//reticulon-4	gi|460393980|ref|XP_004242584.1|//PREDICTED: reticulon-like protein B21 isoform X1 [Solanum lycopersicum]
BGI_novel_G017396	1545	4518.71	1610.08	-1.46475	2.79466e-303	Down	2.73357e-304	NA	NA	NA	NA	K15046//influenza virus NS1A-binding protein;K10457//kelch-like protein 20	XP_004244639.1//PREDICTED: B2 protein [Solanum lycopersicum]
BGI_novel_G002705	876	1838.4	4764.01	1.39776	5.16074e-303	Up	5.05334e-304	NA	NA	GO:0008289//lipid binding	GO:0006869//lipid transport	NA	NP_001333364.1//non-specific lipid-transfer protein precursor [Solanum lycopersicum]
101268273	1488	5801.79	2410.96	-1.24286	9.02357e-303	Down	8.84525e-304	LOC101268273	NA	NA	NA	K04733//interleukin-1 receptor-associated kinase 4 [EC:2.7.11.1]	gi|460382430|ref|XP_004236942.1|//PREDICTED: putative receptor-like protein kinase At4g00960 [Solanum lycopersicum]
BGI_novel_G000336	2342	1980.16	284.86	-2.77326	1.02532e-302	Down	1.00613e-303	NA	NA	GO:0003951//NAD+ kinase activity	GO:0006741//NADP biosynthetic process;GO:0019674//NAD metabolic process	K00858//NAD+ kinase [EC:2.7.1.23]	XP_004228514.1//PREDICTED: NAD(H) kinase 1 [Solanum lycopersicum]
101246664	4239	1591.93	136.61	-3.51861	1.41536e-302	Down	1.39036e-303	LOC101246664	NA	NA	NA	NA	gi|460368045|ref|XP_004229880.1|//PREDICTED: K(+) efflux antiporter 2, chloroplastic-like [Solanum lycopersicum]
BGI_novel_G021629	1360	2697	610.73	-2.11872	6.25551e-302	Down	6.15812e-303	NA	GO:0005618//cell wall;GO:0005576//extracellular region;GO:0005773//vacuole	GO:0008061//chitin binding;GO:0004568//chitinase activity	GO:0006032//chitin catabolic process;GO:0006952//defense response;GO:0016998//cell wall macromolecule catabolic process;GO:0000272//polysaccharide catabolic process	K20547//basic endochitinase B [EC:3.2.1.14];K01183//chitinase [EC:3.2.1.14]	XP_004248635.1//PREDICTED: endochitinase 3-like [Solanum lycopersicum]
BGI_novel_G018633	3645	2837.5	680.68	-2.03554	8.7623e-302	Down	8.63507e-303	NA	GO:0016020//membrane	GO:0004630//phospholipase D activity;GO:0005509//calcium ion binding;GO:0070290//N-acylphosphatidylethanolamine-specific phospholipase D activity	GO:0046470//phosphatidylcholine metabolic process;GO:0016042//lipid catabolic process	K01115//phospholipase D1/2 [EC:3.1.4.4]	XP_009593225.1//PREDICTED: phospholipase D beta 1-like [Nicotiana tomentosiformis]
BGI_novel_G010957	2393	1548.21	123.55	-3.6234	6.21037e-301	Down	6.13322e-302	NA	NA	NA	NA	K04733//interleukin-1 receptor-associated kinase 4 [EC:2.7.11.1];K12812//ATP-dependent RNA helicase UAP56/SUB2 [EC:3.6.4.13];K18081//myotubularin-related protein 1/2 [EC:3.1.3.64 3.1.3.95];K19307//25S rRNA (uracil2634-N3)-methyltransferase [EC:2.1.1.313]	XP_016568366.1//PREDICTED: uncharacterized protein LOC107866874 [Capsicum annuum]
101265154	944	879.35	3131.41	1.85634	1.07688e-299	Up	1.06801e-300	LOC101265154	NA	NA	NA	K15407//queuine tRNA-ribosyltransferase subunit QTRTD1 [EC:2.4.2.29];K13811//3'-phosphoadenosine 5'-phosphosulfate synthase [EC:2.7.7.4 2.7.1.25]	gi|460399341|ref|XP_004245200.1|//PREDICTED: TATA-binding protein-associated factor 2N isoform X1 [Solanum lycopersicum]
101251833	2135	46	1295	4.83921	1.48851e-299	Up	1.47938e-300	LOC101251833	NA	NA	NA	K14487//auxin responsive GH3 gene family	gi|460372142|ref|XP_004231891.1|//PREDICTED: probable indole-3-acetic acid-amido synthetase GH3.1 [Solanum lycopersicum]
101265231	1620	5027.24	1935.14	-1.3533	2.19945e-299	Down	2.18826e-300	LOC101265231	NA	NA	NA	K04733//interleukin-1 receptor-associated kinase 4 [EC:2.7.11.1];K12173//BRCA1-A complex subunit BRE	gi|460385348|ref|XP_004238366.1|//PREDICTED: thaumatin-like protein 1b [Solanum lycopersicum]
101260250	3057	1605.83	4369	1.46802	3.55286e-299	Up	3.54225e-300	LOC101260250	NA	NA	NA	K10405//kinesin family member C1	gi|460397208|ref|XP_004244160.1|//PREDICTED: kinesin-3 [Solanum lycopersicum]
BGI_novel_G022807	3040	1390.88	4013.79	1.553	1.13656e-298	Up	1.13674e-299	NA	GO:0016607//nuclear speck	GO:0003723//RNA binding	NA	K14396//polyadenylate-binding protein 2	XP_004250109.1//PREDICTED: polyadenylate-binding protein 2 isoform X1 [Solanum lycopersicum]
543745	2101	328.3	2019.8	2.64516	1.28114e-298	Up	1.28269e-299	CycA2	GO:0005634//nucleus	NA	NA	K06627//cyclin-A	gi|921273977|ref|NP_001233768.2|//cyclin A2 [Solanum lycopersicum]
BGI_novel_G000899	1538	7326.24	3444.16	-1.06489	1.47708e-298	Down	1.48041e-299	NA	NA	GO:0046872//metal ion binding;GO:0004722//protein serine/threonine phosphatase activity	NA	K14803//protein phosphatase PTC2/3 [EC:3.1.3.16]	XP_004229184.1//PREDICTED: probable protein phosphatase 2C 47 [Solanum lycopersicum]
BGI_novel_G016861	2255	1501.56	4195.57	1.50644	1.54224e-298	Up	1.54734e-299	NA	NA	GO:0008017//microtubule binding	GO:0000226//microtubule cytoskeleton organization;GO:0000910//cytokinesis	K16732//protein regulator of cytokinesis 1	NP_001265928.1//Hop-interacting protein THI016 [Solanum lycopersicum]
BGI_novel_G019157	1757	756.96	2896.43	1.96002	3.85795e-298	Up	3.87878e-299	NA	NA	NA	NA	K01728//pectate lyase [EC:4.2.2.2]	XP_019152397.1//PREDICTED: probable pectate lyase 12 isoform X1 [Ipomoea nil]
BGI_novel_G007393	1418	5713.61	2382.62	-1.23782	2.59649e-296	Down	2.6214e-297	NA	NA	NA	NA	NA	XP_004235205.1//PREDICTED: metacaspase-1-like [Solanum lycopersicum]
101262111	1492	265.84	1861.55	2.83191	1.06008e-295	Up	1.07248e-296	LOC101262111	GO:0005634//nucleus	NA	NA	NA	gi|460387022|ref|XP_004239190.1|//PREDICTED: uncharacterized protein At3g61260 [Solanum lycopersicum]
101258672	1201	1768.82	213.75	-3.02476	7.20557e-295	Down	7.29736e-296	LOC101258672	NA	NA	NA	K19892//glucan endo-1,3-beta-glucosidase 4 [EC:3.2.1.39];K19891//glucan endo-1,3-beta-glucosidase 1/2/3 [EC:3.2.1.39]	gi|460395663|ref|XP_004243401.1|//PREDICTED: PLASMODESMATA CALLOSE-BINDING PROTEIN 5 [Solanum lycopersicum]
BGI_novel_G021821	3866	482.54	2337.76	2.30044	1.31378e-294	Up	1.3319e-295	NA	NA	GO:0003899//DNA-directed 5'-3' RNA polymerase activity;GO:0032549//ribonucleoside binding;GO:0003677//DNA binding	GO:0006351//transcription, DNA-templated	K03021//DNA-directed RNA polymerase III subunit RPC2 [EC:2.7.7.6]	XP_006362214.1//PREDICTED: DNA-directed RNA polymerase III subunit 2-like [Solanum tuberosum]
101253087	1380	1484.5	4.17	-8.45168	1.41152e-294	Down	1.43246e-295	LOC101253087	NA	NA	NA	NA	gi|460388025|ref|XP_004239672.1|//PREDICTED: uncharacterized protein LOC101253087 [Solanum lycopersicum]
BGI_novel_G012770	989	793	2946	1.9174	1.55451e-294	Up	1.5792e-295	NA	GO:0016021//integral component of membrane	NA	NA	NA	XP_015075689.1//PREDICTED: uncharacterized protein LOC107019833 [Solanum pennellii]
101255483	3779	2511.09	538.37	-2.19761	2.49641e-294	Down	2.53867e-295	LOC101255483	NA	NA	NA	K04730//interleukin-1 receptor-associated kinase 1 [EC:2.7.11.1];K13415//protein brassinosteroid insensitive 1 [EC:2.7.10.1 2.7.11.1]	gi|460380450|ref|XP_004235969.1|//PREDICTED: probable LRR receptor-like serine/threonine-protein kinase At1g74360 [Solanum lycopersicum]
BGI_novel_G017061	2154	321.95	1982.79	2.64666	2.353e-293	Up	2.39531e-294	NA	NA	GO:0004553//hydrolase activity, hydrolyzing O-glycosyl compounds	GO:0005975//carbohydrate metabolic process	K19891//glucan endo-1,3-beta-glucosidase 1/2/3 [EC:3.2.1.39]	XP_019237176.1//PREDICTED: glucan endo-1,3-beta-glucosidase 2-like [Nicotiana attenuata]
101254502	2261	2892.67	730.25	-1.96191	3.12565e-293	Down	3.18512e-294	LOC101254502	NA	NA	NA	K14638//solute carrier family 15 (peptide/histidine transporter), member 3/4	gi|460392810|ref|XP_004242006.1|//PREDICTED: protein NRT1/ PTR FAMILY 6.3-like [Solanum lycopersicum]
BGI_novel_G020063	1757	793.98	2938.52	1.91195	1.11056e-292	Up	1.13285e-293	NA	NA	NA	NA	NA	XP_004247502.1//PREDICTED: protein JASON [Solanum lycopersicum]
BGI_novel_G019497	2033	1249.78	27.86	-5.4633	6.12446e-292	Down	6.26026e-293	NA	NA	NA	NA	NA	XP_004246347.1//PREDICTED: protein TIC 56, chloroplastic [Solanum lycopersicum]
BGI_novel_G005940	2278	266.1	1841.55	2.81491	9.34522e-291	Up	9.56224e-292	NA	GO:0005634//nucleus	GO:0005524//ATP binding	GO:0032502//developmental process;GO:0006355//regulation of transcription, DNA-templated;GO:0006351//transcription, DNA-templated	K15601//lysine-specific demethylase 3 [EC:1.14.11.-]	XP_010316034.1//PREDICTED: growth-regulating factor 2-like isoform X2 [Solanum lycopersicum]
BGI_novel_G005092	7019	2697.51	638.96	-2.0538	2.76888e-290	Down	2.83608e-291	NA	GO:0005634//nucleus	NA	NA	K17046//protein DEK;K14306//nuclear pore complex protein Nup62	XP_004232516.1//PREDICTED: pre-rRNA-processing protein ESF1 [Solanum lycopersicum]
BGI_novel_G022768	2957	442.82	2232.92	2.35817	7.2976e-290	Up	7.48236e-291	NA	GO:0005634//nucleus;GO:0033186//CAF-1 complex	NA	GO:0009555//pollen development;GO:0006334//nucleosome assembly;GO:0010026//trichome differentiation;GO:0008283//cell proliferation;GO:0031507//heterochromatin assembly;GO:0009934//regulation of meristem structural organization;GO:0000724//double-strand break repair via homologous recombination;GO:0048366//leaf development;GO:0045787//positive regulation of cell cycle	K10750//chromatin assembly factor 1 subunit A	XP_004250076.1//PREDICTED: chromatin assembly factor 1 subunit FAS1 [Solanum lycopersicum]
101255730	732	415.7	2165.39	2.40505	1.10693e-287	Up	1.14076e-288	LOC101255730	NA	NA	NA	NA	gi|460366758|ref|XP_004229246.1|//PREDICTED: uncharacterized protein LOC101255730 [Solanum lycopersicum]
104648387	835	1247.93	3711.65	1.59656	1.39665e-287	Up	1.4408e-288	LOC104648387	NA	NA	NA	NA	gi|723715254|ref|XP_010323740.1|//PREDICTED: uncharacterized protein LOC104648387 [Solanum lycopersicum]
BGI_novel_G014008	2262	5491.78	2282.66	-1.24252	1.47535e-286	Down	1.52353e-287	NA	GO:0016021//integral component of membrane	GO:0016747//transferase activity, transferring acyl groups other than amino-acyl groups	GO:0006633//fatty acid biosynthetic process	K15397//3-ketoacyl-CoA synthase [EC:2.3.1.199]	AHX25587.1//3-ketoacyl-CoA synthase 11 [Nicotiana tabacum]
101264257	4250	1892.22	278.25	-2.74159	6.5353e-286	Down	6.76243e-287	LOC101264257	NA	NA	NA	K02331//DNA polymerase phi [EC:2.7.7.7]	gi|460369353|ref|XP_004230527.1|//PREDICTED: DNA polymerase V-like [Solanum lycopersicum]
BGI_novel_G004250	1158	3178.28	902.36	-1.79244	3.0833e-285	Down	3.20662e-286	NA	GO:0005840//ribosome;GO:0022627//cytosolic small ribosomal subunit	GO:0003723//RNA binding;GO:0003735//structural constituent of ribosome;GO:0019843//rRNA binding	GO:0006412//translation	K02987//small subunit ribosomal protein S4e	XP_010316939.1//PREDICTED: 40S ribosomal protein S4 [Solanum lycopersicum]
BGI_novel_G007030	2462	4645.12	1755.15	-1.38009	4.17197e-285	Down	4.34321e-286	NA	GO:0005829//cytosol	GO:0004385//guanylate kinase activity	NA	K00942//guanylate kinase [EC:2.7.4.8]	NP_001333384.1//guanylate kinase [Solanum lycopersicum]
BGI_novel_G021598	6220	1609.01	4282.6	1.43635	6.39448e-284	Up	6.67035e-285	NA	GO:0005737//cytoplasm	GO:0061630//ubiquitin protein ligase activity;GO:0004842//ubiquitin-protein transferase activity;GO:0016874//ligase activity	NA	K10590//E3 ubiquitin-protein ligase TRIP12 [EC:2.3.2.26]	XP_010327414.1//PREDICTED: E3 ubiquitin-protein ligase UPL3 [Solanum lycopersicum]
BGI_novel_G024201	2378	3783.88	1246.17	-1.57833	1.34588e-283	Down	1.40818e-284	NA	NA	NA	GO:0006355//regulation of transcription, DNA-templated;GO:0006351//transcription, DNA-templated	K14494//DELLA protein	XP_009616343.1//PREDICTED: scarecrow-like protein 21 [Nicotiana tomentosiformis]
101258667	1554	148.18	1514.74	3.37768	2.29614e-283	Up	2.40723e-284	LOC101258667	NA	NA	NA	K20642//Rho GTPase-activating protein 22/24/25	gi|460393860|ref|XP_004242526.1|//PREDICTED: rho GTPase-activating protein 2-like [Solanum lycopersicum]
BGI_novel_G003674	1021	510.29	2341.72	2.22221	5.22595e-283	Up	5.49523e-284	NA	NA	NA	NA	NA	XP_004233555.1//PREDICTED: uncharacterized protein LOC101251248 [Solanum lycopersicum]
101260310	1453	5136.41	2071.14	-1.2863	6.24727e-283	Down	6.57573e-284	AAT2	GO:0005737//cytoplasm	GO:0016747//transferase activity, transferring acyl groups other than amino-acyl groups	GO:0010143//cutin biosynthetic process;GO:0051179//localization;GO:0010090//trichome morphogenesis	K19747//BAHD acyltransferase [EC:2.3.1.-]	gi|565324125|ref|NP_001274287.1|//BAHD acyltransferase DCR-like [Solanum lycopersicum]
BGI_novel_G011942	4127	95.57	1367.32	3.86268	9.12788e-283	Up	9.62694e-284	NA	NA	GO:0005524//ATP binding;GO:0004672//protein kinase activity	NA	K08818//cell division cycle 2-like [EC:2.7.11.22]	XP_010320985.1//PREDICTED: cyclin-dependent kinase G-2 isoform X1 [Solanum lycopersicum]
101257508	1783	279	1836	2.74226	3.56988e-282	Up	3.77628e-283	LOC101257508	NA	NA	NA	NA	gi|460366770|ref|XP_004229252.1|//PREDICTED: uncharacterized protein DDB_G0271670 [Solanum lycopersicum]
BGI_novel_G003632	1022	3956	1351.5	-1.52545	4.26502e-282	Down	4.52056e-283	NA	GO:0016021//integral component of membrane	NA	NA	NA	XP_010315726.1//PREDICTED: NDR1/HIN1-Like protein 3 [Solanum lycopersicum]
104645573	1022	3956	1351.5	-1.52545	4.26502e-282	Down	4.52056e-283	LOC104645573	NA	NA	NA	NA	gi|723668327|ref|XP_010315726.1|//PREDICTED: protein YLS9-like [Solanum lycopersicum]
543965	1097	5701.86	2439.03	-1.20109	4.64046e-282	Down	4.92336e-283	TFT3	NA	GO:0019904//protein domain specific binding	NA	K06630//14-3-3 protein epsilon	gi|568215531|ref|NP_001275270.1|//14-3-3-like protein C-like [Solanum tuberosum]
BGI_novel_G010214	3033	889.73	3055.04	1.80378	3.04516e-281	Up	3.24677e-282	NA	NA	NA	NA	K12393//AP-1 complex subunit mu	XP_010320107.1//PREDICTED: uncharacterized protein LOC101253281 isoform X11 [Solanum lycopersicum]
101266975	2223	1234	3644	1.58621	9.6459e-280	Up	1.03149e-280	LOC101266975	NA	NA	NA	K04733//interleukin-1 receptor-associated kinase 4 [EC:2.7.11.1]	gi|460404329|ref|XP_004247635.1|//PREDICTED: protein LYK5-like [Solanum lycopersicum]
BGI_novel_G009544	1876	395.34	2084.1	2.42229	3.02876e-279	Up	3.24199e-280	NA	NA	NA	NA	NA	XP_004236639.1//PREDICTED: uncharacterized protein LOC101252274 [Solanum lycopersicum]
101257901	1322	4062.33	1424.94	-1.48737	4.48261e-279	Down	4.80758e-280	LOC101257901	NA	NA	NA	K00059//3-oxoacyl-[acyl-carrier protein] reductase [EC:1.1.1.100]	gi|723663667|ref|XP_010314315.1|//PREDICTED: carbonyl reductase family member 4 isoform X1 [Solanum lycopersicum]
BGI_novel_G019014	969	1289.82	64.88	-4.28922	4.8603e-279	Down	5.21775e-280	NA	GO:0016021//integral component of membrane	NA	NA	K13993//HSP20 family protein	XP_004246713.1//PREDICTED: inactive protein RESTRICTED TEV MOVEMENT 2 [Solanum lycopersicum]
101259236	1959	2113.89	386.93	-2.42572	5.11176e-279	Down	5.49306e-280	LOC101259236	NA	GO:0004066//asparagine synthase (glutamine-hydrolyzing) activity	GO:0006529//asparagine biosynthetic process	K01953//asparagine synthase (glutamine-hydrolysing) [EC:6.3.5.4]	gi|460383355|ref|XP_004237391.1|//PREDICTED: asparagine synthetase [glutamine-hydrolyzing] 2 [Solanum lycopersicum]
101243834	1313	689.17	2672.32	1.97919	9.96744e-279	Up	1.07214e-279	LOC101243834	NA	NA	NA	K08825//dual specificity tyrosine-phosphorylation-regulated kinase 1 [EC:2.7.12.1]	gi|460370254|ref|XP_004230969.1|//PREDICTED: deSI-like protein At4g17486 [Solanum lycopersicum]
BGI_novel_G011326	2865	704.79	2701.19	1.96236	1.37235e-278	Up	1.4776e-279	NA	GO:0005634//nucleus	GO:0000981//RNA polymerase II transcription factor activity, sequence-specific DNA binding;GO:0043565//sequence-specific DNA binding;GO:0044212//transcription regulatory region DNA binding;GO:0001135//transcription factor activity, RNA polymerase II transcription factor recruiting	GO:0006357//regulation of transcription from RNA polymerase II promoter;GO:0030154//cell differentiation	K09422//transcription factor MYB, plant	XP_004238778.1//PREDICTED: myb-related protein A isoform X2 [Solanum lycopersicum]
BGI_novel_G004231	4239	3637.55	7239.96	1.01705	2.46545e-278	Up	2.6597e-279	NA	GO:0016021//integral component of membrane	GO:0005524//ATP binding;GO:0004672//protein kinase activity	NA	K00924//kinase [EC:2.7.1.-];K20718//LRR receptor-like serine/threonine-protein kinase ERECTA [EC:2.7.11.1]	XP_004233157.1//PREDICTED: probable LRR receptor-like serine/threonine-protein kinase At4g20940 [Solanum lycopersicum]
544206	2016	1281.56	6.88	-7.51724	3.24819e-278	Down	3.51091e-279	gldh	NA	NA	NA	K00225//L-galactono-1,4-lactone dehydrogenase [EC:1.3.2.3]	gi|936975817|ref|NP_001234603.2|//L-galactono-1,4-lactone dehydrogenase [Solanum lycopersicum]
BGI_novel_G015139	575	2147.88	5081.4	1.26635	8.67863e-278	Up	9.38969e-279	NA	NA	NA	NA	K02924//large subunit ribosomal protein L39e	OIS97171.1//60s ribosomal protein l39-3, partial [Nicotiana attenuata]
101247196	1320	4833.56	1901.54	-1.32188	9.04062e-278	Down	9.79081e-279	LOC101247196	NA	GO:0004518//nuclease activity	GO:0090305//nucleic acid phosphodiester bond hydrolysis	K08999//uncharacterized protein	gi|723752519|ref|XP_004252794.2|//PREDICTED: bifunctional nuclease 1-like [Solanum lycopersicum]
101248675	1262	3329.02	6799.54	1.05437	2.45417e-277	Up	2.66039e-278	LOC101248675	NA	NA	NA	K03011//DNA-directed RNA polymerase II subunit RPB3	gi|460386613|ref|XP_004238992.1|//PREDICTED: DNA-directed RNA polymerases II, IV and V subunit 3-like [Solanum lycopersicum]
BGI_novel_G019843	1635	1512.07	144.38	-3.36455	2.47199e-277	Down	2.6823e-278	NA	GO:0005777//peroxisome	GO:0016747//transferase activity, transferring acyl groups other than amino-acyl groups	GO:0008152//metabolic process	K07513//acetyl-CoA acyltransferase 1 [EC:2.3.1.16]	XP_004247103.1//PREDICTED: 3-ketoacyl-CoA thiolase 2, peroxisomal [Solanum lycopersicum]
101252461	1101	1186.76	16.65	-6.13133	4.40644e-277	Down	4.79056e-278	LOC101252461	NA	NA	NA	K06699//proteasome activator subunit 4;K12472//epidermal growth factor receptor substrate 15	gi|723677812|ref|XP_004233980.2|//PREDICTED: BURP domain-containing protein 5-like [Solanum lycopersicum]
100750249	1140	2478.7	0	-12.2513	4.62891e-277	Down	5.03728e-278	ADH3	NA	GO:0000166//nucleotide binding;GO:0008270//zinc ion binding;GO:0051903//S-(hydroxymethyl)glutathione dehydrogenase activity	GO:0006069//ethanol oxidation	K00121//S-(hydroxymethyl)glutathione dehydrogenase / alcohol dehydrogenase [EC:1.1.1.284 1.1.1.1]	gi|353703786|ref|NP_001238796.1|//alcohol dehydrogenase class III [Solanum lycopersicum]
101265748	1744	1184.78	17.37	-6.06784	5.98033e-277	Down	6.51419e-278	LOC101265748	NA	NA	NA	K06892//feruloyl-CoA ortho-hydroxylase [EC:1.14.11.-]	gi|460396371|ref|XP_004243749.1|//PREDICTED: uncharacterized protein LOC101265748 [Solanum lycopersicum]
543890	1732	3488.59	1099.73	-1.64146	1.00062e-276	Down	1.09099e-277	LOC543890	GO:0009570//chloroplast stroma	GO:0004747//ribokinase activity	GO:0046835//carbohydrate phosphorylation;GO:0006014//D-ribose metabolic process	K00847//fructokinase [EC:2.7.1.4]	gi|806638566|ref|NP_001234396.2|//fructokinase 3 [Solanum lycopersicum]
101263864	1504	1324.11	79.86	-4.02737	1.4696e-276	Down	1.60387e-277	LOC101263864	NA	NA	NA	K18881//D-lactate dehydratase [EC:4.2.1.130]	gi|460373721|ref|XP_004232663.1|//PREDICTED: protein DJ-1 homolog D [Solanum lycopersicum]
BGI_novel_G015422	1616	200.88	1623.67	3.03889	1.51995e-276	Up	1.66042e-277	NA	GO:0005634//nucleus	GO:0000981//RNA polymerase II transcription factor activity, sequence-specific DNA binding;GO:0003677//DNA binding;GO:0043565//sequence-specific DNA binding;GO:0044212//transcription regulatory region DNA binding;GO:0001135//transcription factor activity, RNA polymerase II transcription factor recruiting	GO:0006357//regulation of transcription from RNA polymerase II promoter;GO:0030154//cell differentiation;GO:0010026//trichome differentiation;GO:0045893//positive regulation of transcription, DNA-templated	K09422//transcription factor MYB, plant	XP_004242766.1//PREDICTED: transcription factor MYB82 [Solanum lycopersicum]
109120127	6897	734.52	2745.84	1.92641	2.38014e-276	Up	2.6026e-277	LOC109120127	NA	NA	NA	NA	gi|971586710|ref|XP_015160869.1|//PREDICTED: uncharacterized protein LOC107059016 [Solanum tuberosum]
101258526	3658	1453.81	125.21	-3.51338	3.75789e-276	Down	4.11306e-277	LOC101258526	NA	NA	NA	K14536//ribosome assembly protein 1 [EC:3.6.5.-]	gi|460411637|ref|XP_004251212.1|//PREDICTED: elongation factor Tu GTP-binding domain-containing protein 1 [Solanum lycopersicum]
BGI_novel_G002797	1087	2803.27	729.57	-1.91796	7.49243e-276	Down	8.23983e-277	NA	GO:0005737//cytoplasm	GO:0008936//nicotinamidase activity;GO:0003824//catalytic activity	GO:0006769//nicotinamide metabolic process;GO:0008152//metabolic process	NA	XP_004230620.1//PREDICTED: nicotinamidase 1 [Solanum lycopersicum]
101251246	1233	1305.02	75.02	-4.09662	2.39101e-275	Down	2.63704e-276	LOC101251246	GO:0022627//cytosolic small ribosomal subunit	GO:0003735//structural constituent of ribosome;GO:0019843//rRNA binding	GO:0006412//translation	K02987//small subunit ribosomal protein S4e	gi|460374672|ref|XP_004233134.1|//PREDICTED: 40S ribosomal protein S4-like [Solanum lycopersicum]
BGI_novel_G008628	1609	1980.5	4805.49	1.30285	1.34766e-274	Up	1.49199e-275	NA	NA	NA	NA	K03063//26S proteasome regulatory subunit T3	XP_004235724.1//PREDICTED: root phototropism protein 3-like [Solanum lycopersicum]
BGI_novel_G011607	4596	5613.06	2415.71	-1.19231	1.6638e-274	Down	1.84373e-275	NA	GO:0016021//integral component of membrane	GO:0000287//magnesium ion binding;GO:0005524//ATP binding;GO:0004012//phospholipid-translocating ATPase activity	NA	K01530//phospholipid-translocating ATPase [EC:3.6.3.1]	XP_019229770.1//PREDICTED: putative phospholipid-transporting ATPase 9 [Nicotiana attenuata]
BGI_novel_G016883	4071	1213	3576.09	1.58384	5.67222e-274	Up	6.29157e-275	NA	NA	GO:0005524//ATP binding;GO:0003777//microtubule motor activity;GO:0008017//microtubule binding	GO:0007018//microtubule-based movement	K10400//kinesin family member 15	XP_015082511.1//PREDICTED: kinesin-like protein KIN12A [Solanum pennellii]
BGI_novel_G022505	1844	16.6	1154.12	6.1435	6.09079e-274	Up	6.76223e-275	NA	NA	NA	NA	NA	NP_001234135.1//SKIP5-like protein [Solanum lycopersicum]
101255316	3824	5983.14	2667.1	-1.1416	5.21866e-273	Down	5.8049e-274	LOC101255316	NA	NA	NA	K13420//LRR receptor-like serine/threonine-protein kinase FLS2 [EC:2.7.11.1]	gi|723720799|ref|XP_010324742.1|//PREDICTED: LRR receptor-like serine/threonine-protein kinase FLS2 isoform X1 [Solanum lycopersicum]
BGI_novel_G014837	1762	2592.67	5710.2	1.16314	5.61034e-273	Up	6.24646e-274	NA	GO:0005874//microtubule;GO:0005737//cytoplasm	GO:0005200//structural constituent of cytoskeleton;GO:0005525//GTP binding;GO:0003924//GTPase activity	GO:0007017//microtubule-based process	K07375//tubulin beta	XP_016577723.1//PREDICTED: tubulin beta chain [Capsicum annuum]
101249565	2082	6019.39	2691.54	-1.13715	5.98541e-273	Down	6.67033e-274	LOC101249565	NA	GO:0016705//oxidoreductase activity, acting on paired donors, with incorporation or reduction of molecular oxygen;GO:0020037//heme binding;GO:0005506//iron ion binding;GO:0004497//monooxygenase activity	GO:0055114//oxidation-reduction process	K09843//(+)-abscisic acid 8'-hydroxylase [EC:1.14.13.93]	gi|460397763|ref|XP_004244436.1|//PREDICTED: abscisic acid 8'-hydroxylase 1 [Solanum lycopersicum]
543684	1785	2807.76	741	-1.89784	1.92466e-272	Down	2.14894e-273	LOC543684	NA	GO:0005524//ATP binding;GO:0004672//protein kinase activity	GO:0006468//protein phosphorylation	K04733//interleukin-1 receptor-associated kinase 4 [EC:2.7.11.1]	gi|350537699|ref|NP_001234561.1|//auxin-regulated dual specificity cytosolic kinase [Solanum lycopersicum]
BGI_novel_G019227	3330	639.93	2546.9	2.01679	2.62321e-272	Up	2.93164e-273	NA	GO:0005634//nucleus	GO:0005524//ATP binding	GO:0032502//developmental process;GO:0006355//regulation of transcription, DNA-templated;GO:0006351//transcription, DNA-templated	NA	XP_004246560.1//PREDICTED: growth-regulating factor 3-like isoform X1 [Solanum lycopersicum]
BGI_novel_G001965	2203	446.38	2156.03	2.29607	3.20274e-271	Up	3.58602e-272	NA	GO:0016021//integral component of membrane	NA	NA	K13993//HSP20 family protein	XP_004230071.1//PREDICTED: protein RESTRICTED TEV MOVEMENT 2 [Solanum lycopersicum]
101254244	2134	1039.85	3263.68	1.67416	8.88988e-271	Up	9.96308e-272	LOC101254244	NA	NA	NA	K17046//protein DEK	gi|460405683|ref|XP_004248305.1|//PREDICTED: serine/threonine-protein kinase PRP4 homolog [Solanum lycopersicum]
BGI_novel_G016746	4079	1323.9	3741.41	1.52282	1.16005e-270	Up	1.30253e-271	NA	NA	NA	NA	K10357//myosin V	XP_010324344.1//PREDICTED: myosin-2-like isoform X2 [Solanum lycopersicum]
101252213	1930	3638.34	1205.97	-1.56905	1.90334e-270	Down	2.1411e-271	LOC101252213	NA	GO:0004674//protein serine/threonine kinase activity;GO:0005524//ATP binding	GO:0006468//protein phosphorylation	K04733//interleukin-1 receptor-associated kinase 4 [EC:2.7.11.1]	gi|723727435|ref|XP_010325852.1|//PREDICTED: probable serine/threonine-protein kinase NAK isoform X1 [Solanum lycopersicum]
BGI_novel_G013216	1120	4261.75	1577.16	-1.41008	2.42861e-270	Down	2.73707e-271	NA	GO:0005887//integral component of plasma membrane;GO:0016021//integral component of membrane	GO:0015250//water channel activity;GO:0005215//transporter activity	GO:0034220//ion transmembrane transport	K09872//aquaporin PIP	NP_001234625.1//aquaporin [Solanum lycopersicum]
101262812	2100	2208.54	5122.57	1.23781	2.86485e-270	Up	3.23172e-271	LOC101262812	NA	NA	NA	K14611//solute carrier family 23 (nucleobase transporter), member 1/2	gi|460386032|ref|XP_004238704.1|//PREDICTED: nucleobase-ascorbate transporter 7 [Solanum lycopersicum]
543626	1079	1196.99	45	-4.70931	6.23651e-270	Down	7.0417e-271	XET4	GO:0048046//apoplast;GO:0005618//cell wall	GO:0004553//hydrolase activity, hydrolyzing O-glycosyl compounds;GO:0016762//xyloglucan:xyloglucosyl transferase activity	GO:0010411//xyloglucan metabolic process;GO:0042546//cell wall biogenesis;GO:0071555//cell wall organization	K08235//xyloglucan:xyloglucosyl transferase [EC:2.4.1.207]	gi|806776611|ref|NP_001234369.2|//xyloglucan endotransglycosylase precursor [Solanum lycopersicum]
BGI_novel_G010738	2473	3459.78	1105.16	-1.62239	6.34245e-270	Down	7.16797e-271	NA	GO:0005737//cytoplasm	GO:0004674//protein serine/threonine kinase activity;GO:0005524//ATP binding;GO:0004672//protein kinase activity	GO:0023014//signal transduction by protein phosphorylation;GO:0007346//regulation of mitotic cell cycle;GO:0032147//activation of protein kinase activity;GO:0031098//stress-activated protein kinase signaling cascade	K11229//mitogen-activated protein kinase kinase kinase [EC:2.7.11.25];K04421//mitogen-activated protein kinase kinase kinase 3 [EC:2.7.11.25]	XP_004238187.1//PREDICTED: mitogen-activated protein kinase kinase kinase YODA isoform X2 [Solanum lycopersicum]
101258577	1505	1310.07	84.32	-3.93359	1.06101e-269	Down	1.20022e-270	LOC101258577	NA	NA	NA	K00894//ethanolamine kinase [EC:2.7.1.82]	gi|460399299|ref|XP_004245179.1|//PREDICTED: probable ethanolamine kinase [Solanum lycopersicum]
101255463	3593	1221.66	54.99	-4.4495	4.10397e-269	Down	4.65104e-270	LOC101255463	GO:0005871//kinesin complex	GO:0005524//ATP binding;GO:0008017//microtubule binding;GO:0008574//ATP-dependent microtubule motor activity, plus-end-directed	GO:0007018//microtubule-based movement	K10398//kinesin family member 11	gi|723746530|ref|XP_010313536.1|//PREDICTED: 125 kDa kinesin-related protein-like [Solanum lycopersicum]
BGI_novel_G008750	3287	644.53	2529.48	1.99655	6.08436e-267	Up	6.92094e-268	NA	NA	NA	NA	K11323//histone arginine demethylase JMJD6 [EC:1.14.11.-]	XP_004235638.2//PREDICTED: uncharacterized protein LOC101253763 [Solanum lycopersicum]
101243925	2526	1444.57	3913.2	1.46174	1.92695e-266	Up	2.19392e-267	LOC101243925	NA	NA	NA	NA	gi|460402699|ref|XP_004246848.1|//PREDICTED: UPF0503 protein At3g09070, chloroplastic [Solanum lycopersicum]
BGI_novel_G017013	1470	5543.17	2407.51	-1.17914	2.15938e-266	Down	2.46082e-267	NA	GO:0005634//nucleus	GO:0003677//DNA binding	GO:0006355//regulation of transcription, DNA-templated;GO:0006351//transcription, DNA-templated	K13126//polyadenylate-binding protein;K05941//glutathione gamma-glutamylcysteinyltransferase [EC:2.3.2.15]	XP_004243993.1//PREDICTED: NAC domain-containing protein 21/22 isoform X1 [Solanum lycopersicum]
BGI_novel_G025960	1307	3713.58	1263.78	-1.53103	2.46491e-266	Down	2.81158e-267	NA	GO:0016021//integral component of membrane	GO:0030246//carbohydrate binding;GO:0004674//protein serine/threonine kinase activity;GO:0005524//ATP binding	NA	K04733//interleukin-1 receptor-associated kinase 4 [EC:2.7.11.1]	XP_006356822.1//PREDICTED: G-type lectin S-receptor-like serine/threonine-protein kinase At4g27290 isoform X1 [Solanum tuberosum]
101258589	2885	6367	2959	-1.08147	2.93469e-266	Down	3.3505e-267	LOC101258589	GO:0016021//integral component of membrane	GO:0030246//carbohydrate binding;GO:0004674//protein serine/threonine kinase activity;GO:0005524//ATP binding	GO:0006468//protein phosphorylation	K04733//interleukin-1 receptor-associated kinase 4 [EC:2.7.11.1]	gi|460402568|ref|XP_004246783.1|//PREDICTED: lectin-domain containing receptor kinase VI.3-like [Solanum lycopersicum]
543637	1105	4634.32	1824.58	-1.32076	4.79925e-266	Down	5.48932e-267	LOC543637	NA	NA	NA	K08235//xyloglucan:xyloglucosyl transferase [EC:2.4.1.207]	gi|836469025|ref|NP_001296797.1|//brassinosteroid-regulated protein BRU1 precursor [Solanum lycopersicum]
101256302	2567	1927.75	4668.51	1.30008	6.08155e-266	Up	6.96237e-267	LOC101256302	NA	NA	NA	K02209//DNA replication licensing factor MCM5 [EC:3.6.4.12]	gi|460393923|ref|XP_004242557.1|//PREDICTED: DNA replication licensing factor MCM5 [Solanum lycopersicum]
101253788	1020	1203.22	3513.03	1.56985	9.60862e-266	Up	1.10104e-266	LOC101253788	GO:0005618//cell wall;GO:0005576//extracellular region	GO:0004568//chitinase activity	GO:0006032//chitin catabolic process;GO:0000272//polysaccharide catabolic process	K01183//chitinase [EC:3.2.1.14]	gi|460388877|ref|XP_004240090.1|//PREDICTED: acidic endochitinase [Solanum lycopersicum]
BGI_novel_G002548	3111	1830.78	289.02	-2.63918	9.75457e-266	Down	1.11878e-266	NA	GO:0016021//integral component of membrane	GO:0016788//hydrolase activity, acting on ester bonds	GO:0044255//cellular lipid metabolic process	K13696//abhydrolase domain-containing protein 1/3	XP_019067345.1//PREDICTED: phospholipase ABHD3 isoform X2 [Solanum lycopersicum]
104645411	573	42.4	1151.68	4.78756	1.19383e-265	Up	1.37049e-266	LOC104645411	NA	NA	NA	K03860//phosphatidylinositol glycan, class Q	gi|723665078|ref|XP_010315202.1|//PREDICTED: peamaclein [Solanum lycopersicum]
BGI_novel_G016486	818	1833.29	290.34	-2.63459	1.33932e-265	Down	1.53891e-266	NA	GO:0005737//cytoplasm	GO:0046914//transition metal ion binding	GO:0030001//metal ion transport;GO:0046916//cellular transition metal ion homeostasis	K04733//interleukin-1 receptor-associated kinase 4 [EC:2.7.11.1];K13459//disease resistance protein RPS2	XP_004243216.1//PREDICTED: uncharacterized protein LOC101251303 [Solanum lycopersicum]
101259064	1961	432.59	2101.13	2.30413	1.80814e-265	Up	2.08329e-266	LOC101259064	GO:0009543//chloroplast thylakoid lumen	GO:0046872//metal ion binding;GO:0004097//catechol oxidase activity	GO:0046148//pigment biosynthetic process;GO:0055114//oxidation-reduction process	K00422//polyphenol oxidase [EC:1.10.3.1]	gi|460401031|ref|XP_004246033.1|//PREDICTED: polyphenol oxidase F, chloroplastic [Solanum lycopersicum]
BGI_novel_G006407	1852	2817.41	5978.82	1.10952	5.24634e-265	Up	6.05019e-266	NA	GO:0005730//nucleolus;GO:0005829//cytosol	GO:0042393//histone binding;GO:0003755//peptidyl-prolyl cis-trans isomerase activity;GO:0005528//FK506 binding	GO:0000412//histone peptidyl-prolyl isomerization;GO:0006334//nucleosome assembly	K14826//FK506-binding nuclear protein [EC:5.2.1.8]	XP_004234165.1//PREDICTED: peptidyl-prolyl cis-trans isomerase FKBP53 [Solanum lycopersicum]
BGI_novel_G006287	1014	1837.19	293.31	-2.62297	6.82972e-265	Down	7.88334e-266	NA	GO:0010287//plastoglobule;GO:0009535//chloroplast thylakoid membrane;GO:0009523//photosystem II;GO:0016021//integral component of membrane;GO:0009941//chloroplast envelope;GO:0009522//photosystem I	GO:0031409//pigment binding;GO:0016168//chlorophyll binding	GO:0009768//photosynthesis, light harvesting in photosystem I;GO:0009416//response to light stimulus;GO:0018298//protein-chromophore linkage	K08912//light-harvesting complex II chlorophyll a/b binding protein 1	NP_001316911.1//chlorophyll a/b-binding protein [Solanum lycopersicum]
101262183	2168	2697.73	5796.18	1.12739	1.27295e-263	Up	1.47333e-264	LOC101262183	NA	NA	NA	K00873//pyruvate kinase [EC:2.7.1.40]	gi|460376854|ref|XP_004234211.1|//PREDICTED: plastidial pyruvate kinase 2 [Solanum lycopersicum]
101258176	1932	1534.75	173.58	-3.1203	1.39679e-263	Down	1.61813e-264	LOC101258176	GO:0009543//chloroplast thylakoid lumen	GO:0046872//metal ion binding;GO:0004097//catechol oxidase activity	GO:0046148//pigment biosynthetic process;GO:0055114//oxidation-reduction process	K00422//polyphenol oxidase [EC:1.10.3.1]	gi|460401025|ref|XP_004246030.1|//PREDICTED: polyphenol oxidase D, chloroplastic [Solanum lycopersicum]
101262459	847	1583.61	192.39	-3.01708	1.54289e-263	Down	1.789e-264	LOC101262459	NA	NA	NA	K10666//E3 ubiquitin-protein ligase RNF5 [EC:2.3.2.27]	gi|460405397|ref|XP_004248162.1|//PREDICTED: E3 ubiquitin-protein ligase RMA1H1-like [Solanum lycopersicum]
BGI_novel_G016721	4730	5101.96	2136.38	-1.23185	8.82333e-263	Down	1.02493e-263	NA	GO:0016021//integral component of membrane	GO:0004674//protein serine/threonine kinase activity;GO:0005524//ATP binding	NA	K04733//interleukin-1 receptor-associated kinase 4 [EC:2.7.11.1]	XP_004244196.1//PREDICTED: receptor-like protein kinase THESEUS 1 [Solanum lycopersicum]
101254689	2057	1604.16	4145.27	1.39368	1.01079e-262	Up	1.17521e-263	LOC101254689	NA	NA	NA	K14638//solute carrier family 15 (peptide/histidine transporter), member 3/4	gi|460386145|ref|XP_004238760.1|//PREDICTED: protein NRT1/ PTR FAMILY 2.13 [Solanum lycopersicum]
BGI_novel_G017982	2093	3486.55	1150.84	-1.57508	1.12743e-260	Down	1.31909e-261	NA	GO:0016021//integral component of membrane;GO:0005886//plasma membrane	GO:0061630//ubiquitin protein ligase activity;GO:0016874//ligase activity	GO:0043161//proteasome-mediated ubiquitin-dependent protein catabolic process	K13148//integrator complex subunit 11 [EC:3.1.27.-]	XP_004245237.1//PREDICTED: E3 ubiquitin-protein ligase At1g63170 [Solanum lycopersicum]
BGI_novel_G004953	4207	1796.22	284.22	-2.63585	2.13639e-260	Down	2.50181e-261	NA	GO:0005694//chromosome	GO:0003677//DNA binding;GO:0003917//DNA topoisomerase type I activity	GO:0006265//DNA topological change	K03168//DNA topoisomerase I [EC:5.99.1.2]	XP_004233765.1//PREDICTED: uncharacterized protein LOC101248941 isoform X2 [Solanum lycopersicum]
BGI_novel_G012420	745	2186.18	5018.87	1.22298	6.87632e-260	Up	8.08131e-261	NA	GO:0005737//cytoplasm	GO:0005179//hormone activity	NA	K17046//protein DEK	NP_001296103.1//systemin soform 1 [Solanum lycopersicum]
101263469	3249	14.3	1096.52	6.28481	1.88438e-259	Up	2.21657e-260	LOC101263469	NA	NA	NA	K17573//meiosis arrest female protein 1	gi|723663387|ref|XP_010313877.1|//PREDICTED: uncharacterized protein LOC101263469 [Solanum lycopersicum]
BGI_novel_G004857	3376	2501.99	617.7	-1.99406	2.63664e-259	Down	3.10697e-260	NA	GO:0005739//mitochondrion;GO:0009507//chloroplast	GO:0004823//leucine-tRNA ligase activity;GO:0005524//ATP binding;GO:0002161//aminoacyl-tRNA editing activity	GO:0032543//mitochondrial translation;GO:0006429//leucyl-tRNA aminoacylation	K01869//leucyl-tRNA synthetase [EC:6.1.1.4]	XP_006348152.1//PREDICTED: leucine--tRNA ligase, chloroplastic/mitochondrial [Solanum tuberosum]
BGI_novel_G000967	1824	2535.02	635	-1.97314	4.06955e-259	Down	4.80402e-260	NA	GO:0005618//cell wall	GO:0045330//aspartyl esterase activity;GO:0030599//pectinesterase activity	GO:0045490//pectin catabolic process;GO:0042545//cell wall modification	K01051//pectinesterase [EC:3.1.1.11]	XP_004229371.1//PREDICTED: probable pectinesterase 53 [Solanum lycopersicum]
101262152	1007	1179.22	3433.58	1.56591	7.86271e-259	Up	9.29001e-260	LOC101262152	NA	NA	NA	K10666//E3 ubiquitin-protein ligase RNF5 [EC:2.3.2.27]	gi|460405395|ref|XP_004248161.1|//PREDICTED: E3 ubiquitin-protein ligase RMA1H1 [Solanum lycopersicum]
BGI_novel_G004303	2784	230.99	1624.43	2.83806	8.06452e-259	Up	9.53692e-260	NA	GO:0000347//THO complex;GO:0042555//MCM complex	GO:0003677//DNA binding;GO:0005524//ATP binding;GO:0004386//helicase activity	GO:0006270//DNA replication initiation	K02541//DNA replication licensing factor MCM3 [EC:3.6.4.12]	XP_010316921.1//PREDICTED: DNA replication licensing factor MCM3 homolog 2 isoform X3 [Solanum lycopersicum]
BGI_novel_G002747	1367	6530	3116	-1.04335	1.33332e-257	Down	1.58094e-258	NA	NA	NA	NA	NA	XP_019168979.1//PREDICTED: uncharacterized protein LOC109164883 [Ipomoea nil]
101251958	1529	3872	1389	-1.455	1.48784e-257	Down	1.76572e-258	LOC101251958	NA	NA	NA	K19038//E3 ubiquitin-protein ligase ATL41 [EC:2.3.2.27];K19041//E3 ubiquitin-protein ligase RNF38/44 [EC:2.3.2.27];K16286//E3 ubiquitin-protein ligase EL5 [EC:2.3.2.27]	gi|460414537|ref|XP_004252625.1|//PREDICTED: RING-H2 finger protein ATL3-like [Solanum lycopersicum]
101245468	3504	2727.6	5790.98	1.11021	5.48815e-257	Up	6.53619e-258	LOC101245468	NA	NA	NA	K20792//N-alpha-acetyltransferase 15/16, NatA auxiliary subunit	gi|460392234|ref|XP_004241722.1|//PREDICTED: N-alpha-acetyltransferase 16, NatA auxiliary subunit-like [Solanum lycopersicum]
BGI_novel_G009612	2527	4666.72	1884.61	-1.28411	1.52742e-256	Down	1.8239e-257	NA	GO:0016021//integral component of membrane	GO:0016757//transferase activity, transferring glycosyl groups	NA	K18134//protein O-GlcNAc transferase [EC:2.4.1.255]	XP_004236596.1//PREDICTED: EGF domain-specific O-linked N-acetylglucosamine transferase-like [Solanum lycopersicum]
BGI_novel_G025512	8088	2117.21	4893.05	1.2326	1.53066e-256	Up	1.82938e-257	NA	GO:0005737//cytoplasm	GO:0046872//metal ion binding;GO:0003872//6-phosphofructokinase activity;GO:0005524//ATP binding;GO:0047334//diphosphate-fructose-6-phosphate 1-phosphotransferase activity	NA	K00895//diphosphate-dependent phosphofructokinase [EC:2.7.1.90]	XP_009777872.1//PREDICTED: pyrophosphate--fructose 6-phosphate 1-phosphotransferase subunit alpha [Nicotiana sylvestris]
101244800	1277	240.79	1636.16	2.7885	4.84293e-256	Up	5.79314e-257	LOC101244800	NA	GO:0004001//adenosine kinase activity	GO:0006167//AMP biosynthetic process;GO:0016310//phosphorylation;GO:0006166//purine ribonucleoside salvage	K00856//adenosine kinase [EC:2.7.1.20]	gi|460402303|ref|XP_004246653.1|//PREDICTED: adenosine kinase 2-like [Solanum lycopersicum]
BGI_novel_G021128	985	1096.63	27.52	-5.29242	2.83458e-255	Down	3.39966e-256	NA	GO:0005829//cytosol;GO:0016021//integral component of membrane	GO:0010945//CoA pyrophosphatase activity;GO:0008893//guanosine-3',5'-bis(diphosphate) 3'-diphosphatase activity;GO:0016787//hydrolase activity;GO:0000210//NAD+ diphosphatase activity	GO:2001294//malonyl-CoA catabolic process;GO:0007275//multicellular organism development;GO:0015937//coenzyme A biosynthetic process	K17879//peroxisomal coenzyme A diphosphatase NUDT7 [EC:3.6.1.-]	XP_004248137.1//PREDICTED: nudix hydrolase 15, mitochondrial [Solanum lycopersicum]
101245072	6362	4511.72	1797.27	-1.30384	5.6592e-254	Down	6.80516e-255	LOC101245072	NA	NA	NA	K03125//transcription initiation factor TFIID subunit 1	gi|723712476|ref|XP_010323244.1|//PREDICTED: transcription initiation factor TFIID subunit 1 isoform X1 [Solanum lycopersicum]
101261342	1162	2903.83	844.49	-1.75777	7.59773e-254	Down	9.1442e-255	LOC101261342	NA	NA	NA	K12581//CCR4-NOT transcription complex subunit 7/8;K13126//polyadenylate-binding protein;K05941//glutathione gamma-glutamylcysteinyltransferase [EC:2.3.2.15];K01054//acylglycerol lipase [EC:3.1.1.23]	gi|460396870|ref|XP_004243993.1|//PREDICTED: NAC domain-containing protein 21/22 [Solanum lycopersicum]
BGI_novel_G017151	1760	507	2197	2.13951	1.83839e-253	Up	2.21644e-254	NA	GO:0016021//integral component of membrane	GO:0015238//drug transmembrane transporter activity;GO:0015297//antiporter activity	NA	K03327//multidrug resistance protein, MATE family	XP_016549795.1//PREDICTED: protein DETOXIFICATION 21-like isoform X1 [Capsicum annuum]
101262595	1692	1539.62	3982.69	1.3952	6.75132e-253	Up	8.14674e-254	LOC101262595	NA	NA	NA	K11338//RuvB-like protein 2 [EC:3.6.4.12]	gi|460377450|ref|XP_004234506.1|//PREDICTED: ruvB-like 2 [Solanum lycopersicum]
101266106	5697	1081.27	24.85	-5.4193	1.41952e-252	Down	1.71589e-253	LOC101266106	NA	NA	NA	K13095//splicing factor 1	gi|723683039|ref|XP_010318168.1|//PREDICTED: LOW QUALITY PROTEIN: branchpoint-bridging protein [Solanum lycopersicum]
BGI_novel_G006243	2743	2045.2	411.09	-2.29068	1.97593e-252	Down	2.39055e-253	NA	NA	GO:0004252//serine-type endopeptidase activity	NA	K01303//acylaminoacyl-peptidase [EC:3.4.19.1]	XP_006356048.1//PREDICTED: acylamino-acid-releasing enzyme isoform X1 [Solanum tuberosum]
BGI_novel_G019007	1904	657.21	2481.73	1.94095	1.98963e-252	Up	2.40921e-253	NA	GO:0005634//nucleus	NA	GO:0016973//poly(A)+ mRNA export from nucleus	K18732//SAP domain-containing ribonucleoprotein	XP_004246720.1//PREDICTED: protein MODIFIER OF SNC1 11 [Solanum lycopersicum]
BGI_novel_G024763	484	25.38	1061.58	5.41041	4.29826e-252	Up	5.2137e-253	NA	NA	NA	NA	K11855//ubiquitin carboxyl-terminal hydrolase 36/42 [EC:3.4.19.12]	XP_004251927.1//PREDICTED: putative glycine-rich cell wall structural protein 1 [Solanum lycopersicum]
BGI_novel_G007768	2639	5178.25	2237.22	-1.18672	1.68016e-251	Down	2.04152e-252	NA	GO:0000145//exocyst;GO:0005829//cytosol;GO:0005886//plasma membrane	NA	GO:0006887//exocytosis	K07195//exocyst complex component 7	XP_010319057.1//PREDICTED: exocyst complex component EXO70B1 [Solanum lycopersicum]
101259677	1293	194.71	1503.27	2.97274	7.46581e-251	Up	9.10283e-252	LOC101259677	GO:0016021//integral component of membrane	NA	NA	K13348//protein Mpv17	gi|460405380|ref|XP_004248154.1|//PREDICTED: protein SYM1 [Solanum lycopersicum]
BGI_novel_G017872	2327	354.43	1868.78	2.42256	1.32122e-250	Up	1.61369e-251	NA	NA	GO:0004471//malate dehydrogenase (decarboxylating) (NAD+) activity;GO:0046872//metal ion binding;GO:0051287//NAD binding	NA	K00029//malate dehydrogenase (oxaloacetate-decarboxylating)(NADP+) [EC:1.1.1.40]	XP_009801542.1//PREDICTED: NADP-dependent malic enzyme-like isoform X2 [Nicotiana sylvestris]
543981	1047	2373.58	5227.87	1.16319	4.43552e-250	Up	5.42204e-251	SODCP.2	GO:0048046//apoplast;GO:0009579//thylakoid;GO:0009570//chloroplast stroma	GO:0004784//superoxide dismutase activity;GO:0004601//peroxidase activity;GO:0005507//copper ion binding;GO:0008270//zinc ion binding	GO:0019430//removal of superoxide radicals;GO:0071486//cellular response to high light intensity;GO:0055114//oxidation-reduction process	K04565//superoxide dismutase, Cu-Zn family [EC:1.15.1.1]	gi|915409259|ref|NP_001234769.2|//superoxide dismutase [Cu-Zn], chloroplastic [Solanum lycopersicum]
BGI_novel_G004970	5015	231.77	1589.66	2.80199	4.81514e-250	Up	5.89114e-251	NA	NA	GO:0043531//ADP binding	GO:0007165//signal transduction	K22038//volume-regulated anion channel	XP_004233763.1//PREDICTED: TMV resistance protein N-like [Solanum lycopersicum]
BGI_novel_G003532	1877	129.14	1330.65	3.38916	7.8114e-250	Up	9.56515e-251	NA	NA	NA	NA	K15333//tRNA guanosine-2'-O-methyltransferase [EC:2.1.1.34]	XP_010315640.1//PREDICTED: subtilisin-like protease SBT2.2 isoform X2 [Solanum lycopersicum]
544147	929	1853.23	329.88	-2.466	1.75804e-249	Down	2.15643e-250	CHI17	GO:0005615//extracellular space	GO:0004568//chitinase activity	GO:0006032//chitin catabolic process;GO:0016998//cell wall macromolecule catabolic process;GO:0006952//defense response;GO:0000272//polysaccharide catabolic process;GO:0009607//response to biotic stimulus	K20547//basic endochitinase B [EC:3.2.1.14]	gi|350534512|ref|NP_001234400.1|//acidic 27 kDa endochitinase precursor [Solanum lycopersicum]
BGI_novel_G011317	3250	2273.21	529.71	-2.07742	1.71701e-248	Down	2.1133e-249	NA	GO:0009570//chloroplast stroma	GO:0004556//alpha-amylase activity;GO:0005509//calcium ion binding;GO:0103025//alpha-amylase activity (releasing maltohexaose)	GO:0005975//carbohydrate metabolic process	K01176//alpha-amylase [EC:3.2.1.1]	XP_004238770.1//PREDICTED: alpha-amylase 3, chloroplastic [Solanum lycopersicum]
BGI_novel_G009729	1480	1965.15	382.91	-2.33553	2.79593e-248	Down	3.44417e-249	NA	NA	GO:0004497//monooxygenase activity;GO:0071949//FAD binding	GO:0044550//secondary metabolite biosynthetic process	K09838//zeaxanthin epoxidase [EC:1.14.15.21]	XP_004237255.1//PREDICTED: uncharacterized protein LOC101260928 [Solanum lycopersicum]
BGI_novel_G004819	2380	174.35	1441.48	3.07153	3.59686e-248	Up	4.44211e-249	NA	NA	NA	GO:0007051//spindle organization	K16743//abnormal spindle-like microcephaly-associated protein	XP_010316597.1//PREDICTED: abnormal spindle-like microcephaly-associated protein homolog isoform X1 [Solanum lycopersicum]
101256006	926	3494.79	1198.5	-1.51994	4.28839e-248	Down	5.30064e-249	CAB12	NA	NA	NA	K08910//light-harvesting complex I chlorophyll a/b binding protein 4	gi|723708616|ref|XP_010322569.1|//PREDICTED: chlorophyll a-b binding protein 4, chloroplastic-like [Solanum lycopersicum]
BGI_novel_G023655	1283	2519.29	5425.26	1.13071	5.0717e-248	Up	6.27416e-249	NA	GO:0048046//apoplast;GO:0005618//cell wall	GO:0016762//xyloglucan:xyloglucosyl transferase activity;GO:0004553//hydrolase activity, hydrolyzing O-glycosyl compounds	GO:0010411//xyloglucan metabolic process;GO:0042546//cell wall biogenesis;GO:0071555//cell wall organization	K08235//xyloglucan:xyloglucosyl transferase [EC:2.4.1.207]	NP_001233819.2//xyloglucan endotransglucosylase-hydrolase XTH6 precursor [Solanum lycopersicum]
101263809	2422	3855.22	1414.84	-1.42214	7.41146e-248	Down	9.17644e-249	LOC101263809	NA	NA	NA	K04421//mitogen-activated protein kinase kinase kinase 3 [EC:2.7.11.25]	gi|723695504|ref|XP_010320358.1|//PREDICTED: mitogen-activated protein kinase kinase kinase YODA isoform X1 [Solanum lycopersicum]
BGI_novel_G011337	1028	2774.17	5789.84	1.0855	8.42932e-248	Up	1.04455e-248	NA	GO:0022627//cytosolic small ribosomal subunit;GO:0015935//small ribosomal subunit	GO:0003735//structural constituent of ribosome;GO:0019843//rRNA binding	GO:0006412//translation;GO:0045903//positive regulation of translational fidelity	K02997//small subunit ribosomal protein S9e	XP_004238784.1//PREDICTED: 40S ribosomal protein S9-2 [Solanum lycopersicum]
101257469	974	785.27	2689.53	1.80013	4.1061e-247	Up	5.09253e-248	LOC101257469	GO:0010369//chromocenter;GO:0005635//nuclear envelope;GO:0000776//kinetochore;GO:0005737//cytoplasm;GO:0005828//kinetochore microtubule	GO:0003677//DNA binding	GO:0007094//mitotic spindle assembly checkpoint	K02537//mitotic spindle assembly checkpoint protein MAD2	gi|460386994|ref|XP_004239177.1|//PREDICTED: mitotic spindle checkpoint protein MAD2 [Solanum lycopersicum]
BGI_novel_G025620	2340	5403.23	2407.06	-1.14252	4.99688e-247	Down	6.20779e-248	NA	GO:0016021//integral component of membrane	GO:0005524//ATP binding;GO:0004672//protein kinase activity	NA	K04733//interleukin-1 receptor-associated kinase 4 [EC:2.7.11.1]	XP_019067246.1//PREDICTED: probably inactive leucine-rich repeat receptor-like protein kinase At5g48380 [Solanum lycopersicum]
BGI_novel_G015513	3508	3186.55	6362.7	1.02168	1.21664e-246	Up	1.51403e-247	NA	GO:0043231//intracellular membrane-bounded organelle	GO:0003723//RNA binding;GO:0004519//endonuclease activity	GO:0009451//RNA modification	K01176//alpha-amylase [EC:3.2.1.1];K06066//CBF1 interacting corepressor	XP_004242825.1//PREDICTED: pentatricopeptide repeat-containing protein At4g33170-like [Solanum lycopersicum]
101249981	2072	1721.35	278.87	-2.60184	4.02486e-246	Down	5.0171e-247	LOC101249981	NA	NA	NA	K19791//iron transport multicopper oxidase	gi|460373799|ref|XP_004232701.1|//PREDICTED: L-ascorbate oxidase homolog [Solanum lycopersicum]
BGI_novel_G001003	2594	1732.03	4238.62	1.31516	6.26901e-246	Up	7.82107e-247	NA	GO:0005634//nucleus;GO:0042555//MCM complex	GO:0003677//DNA binding;GO:0005524//ATP binding;GO:0003678//DNA helicase activity	GO:0006270//DNA replication initiation	K02210//DNA replication licensing factor MCM7 [EC:3.6.4.12]	XP_016554045.1//PREDICTED: DNA replication licensing factor MCM7 isoform X1 [Capsicum annuum]
101262214	1874	2610.81	710.02	-1.85453	1.00109e-245	Down	1.24999e-246	LOC101262214	GO:0016021//integral component of membrane	GO:0016747//transferase activity, transferring acyl groups other than amino-acyl groups	GO:0006633//fatty acid biosynthetic process	K15397//3-ketoacyl-CoA synthase [EC:2.3.1.199]	gi|460386862|ref|XP_004239114.1|//PREDICTED: 3-ketoacyl-CoA synthase 19-like [Solanum lycopersicum]
101244796	1532	1684.53	264.01	-2.64965	1.09227e-245	Down	1.36498e-246	LOC101244796	NA	NA	NA	K00480//salicylate hydroxylase [EC:1.14.13.1];K09838//zeaxanthin epoxidase [EC:1.14.15.21]	gi|460400583|ref|XP_004245813.1|//PREDICTED: LOW QUALITY PROTEIN: zeaxanthin epoxidase, chloroplastic-like [Solanum lycopersicum]
BGI_novel_G009499	2610	968.7	3001.82	1.65575	2.5216e-245	Up	3.15646e-246	NA	GO:0005777//peroxisome	GO:0016491//oxidoreductase activity	GO:0080024//indolebutyric acid metabolic process;GO:0048767//root hair elongation;GO:0080026//response to indolebutyric acid	K11147//dehydrogenase/reductase SDR family member 4 [EC:1.1.-.-]	XP_004236675.1//PREDICTED: tropinone reductase-like 3 [Solanum lycopersicum]
101256258	2621	1079.06	9.19	-6.85146	2.63116e-245	Down	3.29637e-246	LOC101256258	NA	NA	NA	K05677//ATP-binding cassette, subfamily D (ALD), member 3	gi|460413159|ref|XP_004251962.1|//PREDICTED: ABC transporter D family member 2, chloroplastic [Solanum lycopersicum]
BGI_novel_G005091	2216	1915.33	367.17	-2.35904	6.65423e-245	Down	8.35049e-246	NA	GO:0016021//integral component of membrane	GO:0004190//aspartic-type endopeptidase activity	GO:0006508//proteolysis;GO:0030163//protein catabolic process	K00924//kinase [EC:2.7.1.-]	NP_001333366.1//aspartyl protease family protein precursor [Solanum lycopersicum]
BGI_novel_G021482	1125	5661.2	2590.42	-1.10389	6.88632e-245	Down	8.64897e-246	NA	NA	GO:0004061//arylformamidase activity	GO:0019441//tryptophan catabolic process to kynurenine	NA	XP_004248760.1//PREDICTED: uncharacterized protein LOC101254542 [Solanum lycopersicum]
BGI_novel_G005242	672	1970.96	4592.1	1.24429	1.94129e-244	Up	2.44633e-245	NA	GO:0005634//nucleus	GO:0003677//DNA binding	NA	K09522//DnaJ homolog subfamily C member 2	XP_004232415.1//PREDICTED: protein RADIALIS-like 5 [Solanum lycopersicum]
101250294	1648	4369.8	1752.33	-1.29426	2.90001e-243	Down	3.67271e-244	LOC101250294	GO:0005634//nucleus;GO:0005667//transcription factor complex	GO:0001228//transcriptional activator activity, RNA polymerase II transcription regulatory region sequence-specific DNA binding;GO:0003682//chromatin binding;GO:0000977//RNA polymerase II regulatory region sequence-specific DNA binding;GO:0008270//zinc ion binding;GO:0001085//RNA polymerase II transcription factor binding	GO:0030154//cell differentiation;GO:0045944//positive regulation of transcription from RNA polymerase II promoter	K17604//zinc finger SWIM domain-containing protein 3;K17895//GATA-binding protein 3	gi|460381805|ref|XP_004236632.1|//PREDICTED: GATA transcription factor 8 [Solanum lycopersicum]
BGI_novel_G005273	1470	117.1	1271.46	3.46471	4.39814e-243	Up	5.57923e-244	NA	NA	GO:0005524//ATP binding;GO:0004386//helicase activity	NA	K19001//ATP-dependent DNA helicase	XP_004232396.1//PREDICTED: ATP-dependent DNA helicase DDM1-like [Solanum lycopersicum]
101259500	1396	1013.06	3061.59	1.61959	1.92359e-242	Up	2.44822e-243	LOC101259500	NA	NA	NA	NA	gi|460373362|ref|XP_004232489.1|//PREDICTED: uncharacterized protein LOC101259500 [Solanum lycopersicum]
BGI_novel_G000568	1335	1839.84	338.49	-2.41836	3.20865e-242	Down	4.08713e-243	NA	GO:0016021//integral component of membrane	NA	NA	K10696//E3 ubiquitin-protein ligase BRE1 [EC:2.3.2.27]	XP_004228340.1//PREDICTED: transmembrane protein 45B-like [Solanum lycopersicum]
BGI_novel_G012293	3485	4592.82	1899.15	-1.24999	3.48157e-242	Down	4.43842e-243	NA	GO:0005618//cell wall;GO:0005576//extracellular region	GO:0004553//hydrolase activity, hydrolyzing O-glycosyl compounds;GO:0008061//chitin binding;GO:0004568//chitinase activity	GO:0006032//chitin catabolic process;GO:0005975//carbohydrate metabolic process;GO:0000272//polysaccharide catabolic process	K01183//chitinase [EC:3.2.1.14]	XP_004240090.1//PREDICTED: acidic endochitinase [Solanum lycopersicum]
101253421	3299	1	1622	10.6876	1.96362e-241	Up	2.50946e-242	LOC101253421	NA	NA	NA	K04733//interleukin-1 receptor-associated kinase 4 [EC:2.7.11.1]	gi|460403660|ref|XP_004247307.1|//PREDICTED: uncharacterized protein LOC101253421 [Solanum lycopersicum]
BGI_novel_G003425	4585	3168.79	1032.9	-1.5932	5.18007e-241	Down	6.63632e-242	NA	NA	GO:0005524//ATP binding;GO:0004672//protein kinase activity	NA	K04733//interleukin-1 receptor-associated kinase 4 [EC:2.7.11.1]	XP_019067666.1//PREDICTED: receptor-like protein kinase FERONIA [Solanum lycopersicum]
101256036	2061	1078.67	44.29	-4.5821	7.52816e-241	Down	9.65241e-242	LOC101256036	GO:0009504//cell plate;GO:0005635//nuclear envelope;GO:0032153//cell division site;GO:0005886//plasma membrane;GO:0009507//chloroplast	NA	GO:0000911//cytokinesis by cell plate formation	K14319//Ran GTPase-activating protein 1	gi|460403370|ref|XP_004247164.1|//PREDICTED: RAN GTPase-activating protein 1 [Solanum lycopersicum]
101261084	1040	5427.99	2454.12	-1.12118	8.51816e-241	Down	1.09307e-241	LOC101261084	NA	NA	NA	K12185//ESCRT-I complex subunit VPS37	gi|723739768|ref|XP_010312332.1|//PREDICTED: vacuolar protein-sorting-associated protein 37 homolog 1 [Solanum lycopersicum]
BGI_novel_G010018	1379	2827.03	841.33	-1.72451	1.0214e-240	Down	1.31175e-241	NA	GO:0005737//cytoplasm	GO:0004725//protein tyrosine phosphatase activity	NA	K18045//tyrosine-protein phosphatase SIW14 [EC:3.1.3.48]	XP_004237383.1//PREDICTED: probable tyrosine-protein phosphatase At1g05000 [Solanum lycopersicum]
543520	1587	214.61	1508.68	2.83753	1.87243e-240	Up	2.40667e-241	T6	GO:0005634//nucleus	GO:0043565//sequence-specific DNA binding	GO:0006355//regulation of transcription, DNA-templated	K16670//homeobox protein Meis2;K15613//homeobox protein Meis1	gi|723668663|ref|XP_010315866.1|//PREDICTED: homeobox protein knotted-1-like LET6 isoform X1 [Solanum lycopersicum]
104649465	627	979	2991	1.63528	3.60191e-240	Up	4.63715e-241	LOC104649465	NA	NA	NA	NA	gi|723734152|ref|XP_010327073.1|//PREDICTED: uncharacterized protein LOC104649465 [Solanum lycopersicum]
543962	841	3095.7	6184.52	1.02243	4.50536e-240	Up	5.80499e-241	ARPI	NA	GO:0004867//serine-type endopeptidase inhibitor activity	GO:0010951//negative regulation of endopeptidase activity	NA	gi|350534604|ref|NP_001234661.1|//proteinase inhibitor type-2 TR8 precursor [Solanum lycopersicum]
BGI_novel_G000536	1097	258	1608	2.66386	6.8721e-240	Up	8.86886e-241	NA	NA	NA	NA	K10760//adenylate dimethylallyltransferase (cytokinin synthase) [EC:2.5.1.27 2.5.1.112]	XP_010312908.1//PREDICTED: uncharacterized protein LOC104644544 [Solanum lycopersicum]
BGI_novel_G008633	2574	144.91	1331.59	3.22395	1.23373e-239	Up	1.59349e-240	NA	GO:0000151//ubiquitin ligase complex	GO:0043130//ubiquitin binding;GO:0008270//zinc ion binding;GO:0046982//protein heterodimerization activity;GO:0004842//ubiquitin-protein transferase activity	GO:0010029//regulation of seed germination	K10632//BRCA1-associated protein [EC:2.3.2.27]	XP_004235720.1//PREDICTED: BRCA1-associated protein [Solanum lycopersicum]
BGI_novel_G008460	1219	185.18	1432.07	2.97513	3.05799e-239	Up	3.95293e-240	NA	GO:0005634//nucleus	NA	GO:0051301//cell division	NA	XP_004235804.1//PREDICTED: cell division cycle-associated protein 7-like [Solanum lycopersicum]
BGI_novel_G023863	3988	2351.46	5114.02	1.14493	1.33743e-238	Up	1.73304e-239	NA	GO:0005634//nucleus	GO:0008289//lipid binding;GO:0003677//DNA binding	NA	K09338//homeobox-leucine zipper protein	XP_004251138.1//PREDICTED: homeobox-leucine zipper protein REVOLUTA [Solanum lycopersicum]
104646058	1707	3572.79	1279.3	-1.45766	1.97466e-238	Down	2.56084e-239	LOC104646058	NA	NA	NA	K16219//protein N-terminal methyltransferase [EC:2.1.1.244];K20393//PRA1 family protein 3	gi|723678328|ref|XP_010317353.1|//PREDICTED: uncharacterized protein LOC104646058, partial [Solanum lycopersicum]
BGI_novel_G012342	1375	1710.13	289.17	-2.54008	3.80065e-238	Down	4.93285e-239	NA	NA	NA	NA	K00344//NADPH2:quinone reductase [EC:1.6.5.5]	NP_001297054.1//phosphoglycerate mutase family protein [Solanum lycopersicum]
BGI_novel_G005016	2145	4033.78	1564.8	-1.34212	1.53136e-237	Down	1.99237e-238	NA	GO:0005634//nucleus;GO:0005737//cytoplasm	GO:0004674//protein serine/threonine kinase activity;GO:0005524//ATP binding	GO:0050684//regulation of mRNA processing;GO:0000245//spliceosomal complex assembly;GO:0035556//intracellular signal transduction	K08832//serine/threonine-protein kinase SRPK3 [EC:2.7.11.1]	XP_004232572.1//PREDICTED: SRSF protein kinase 1-like [Solanum lycopersicum]
BGI_novel_G019309	1312	2048.75	446.2	-2.17495	2.13406e-237	Down	2.78098e-238	NA	NA	GO:0046872//metal ion binding;GO:0016491//oxidoreductase activity	NA	K06892//feruloyl-CoA ortho-hydroxylase [EC:1.14.11.-];K13229//2,4-dihydroxy-1,4-benzoxazin-3-one-glucoside dioxygenase [EC:1.14.20.2]	XP_016543007.1//PREDICTED: 1-aminocyclopropane-1-carboxylate oxidase homolog 1-like [Capsicum annuum]
BGI_novel_G005935	3043	1398.01	162.9	-3.07728	3.33781e-237	Down	4.35314e-238	NA	GO:0005737//cytoplasm	GO:0043022//ribosome binding;GO:0005525//GTP binding	NA	K20178//vacuolar protein sorting-associated protein 8;K03665//GTPase	XP_004231950.1//PREDICTED: GTP-binding protein At3g49725, chloroplastic isoform X2 [Solanum lycopersicum]
101263198	1779	4290.02	1727.63	-1.28816	4.03028e-237	Down	5.26047e-238	LOC101263198	NA	NA	NA	K02945//small subunit ribosomal protein S1	gi|460415847|ref|XP_004253265.1|//PREDICTED: uncharacterized protein LOC101263198 [Solanum lycopersicum]
101256046	1905	2754.09	812.16	-1.73771	4.75804e-237	Down	6.21535e-238	LOC101256046	NA	NA	NA	K04733//interleukin-1 receptor-associated kinase 4 [EC:2.7.11.1]	gi|460407142|ref|XP_004249015.1|//PREDICTED: serine/threonine-protein kinase At5g01020 [Solanum lycopersicum]
BGI_novel_G008055	2158	670.55	2427.39	1.88002	1.07384e-236	Up	1.40386e-237	NA	NA	NA	NA	K06699//proteasome activator subunit 4;K12472//epidermal growth factor receptor substrate 15	XP_004236111.1//PREDICTED: polygalacturonase 1 beta-like protein 3 [Solanum lycopersicum]
BGI_novel_G001547	983	95	1183.97	3.66359	2.79121e-236	Up	3.65489e-237	NA	NA	NA	GO:2000024//regulation of leaf development;GO:0010154//fruit development;GO:0009909//regulation of flower development;GO:0010158//abaxial cell fate specification;GO:0010093//specification of floral organ identity;GO:0009933//meristem structural organization;GO:0007275//multicellular organism development;GO:0090706//specification of plant organ position;GO:0009944//polarity specification of adaxia…	NA	XP_004229793.1//PREDICTED: axial regulator YABBY 1 [Solanum lycopersicum]
BGI_novel_G014951	2086	385.7	1870.39	2.30182	3.204e-236	Up	4.19878e-237	NA	NA	NA	GO:0009908//flower development;GO:0030154//cell differentiation	K20553//5'-3' exoribonuclease 4 [EC:3.1.13.-];K08867//WNK lysine deficient protein kinase [EC:2.7.11.1];K18626//trichohyalin	XP_004242450.1//PREDICTED: FRIGIDA-like protein 3 [Solanum lycopersicum]
101252910	2100	2984.52	945.1	-1.63493	1.19536e-235	Down	1.56775e-236	LOC101252910	NA	NA	NA	K00924//kinase [EC:2.7.1.-]	gi|460400640|ref|XP_004245841.1|//PREDICTED: probable receptor-like protein kinase At5g47070 [Solanum lycopersicum]
101262938	1473	3619	1318	-1.43321	1.73629e-235	Down	2.27901e-236	LOC101262938	NA	NA	NA	K10406//kinesin family member C2/C3	gi|460398693|ref|XP_004244888.1|//PREDICTED: uncharacterized protein LOC101262938 [Solanum lycopersicum]
101246031	726	3854	1463	-1.37339	4.14342e-235	Down	5.4429e-236	LOC101246031	NA	NA	NA	NA	gi|460414330|ref|XP_004252525.1|//PREDICTED: classical arabinogalactan protein 5-like [Solanum lycopersicum]
101263891	2121	1546.95	226.76	-2.74616	1.83201e-234	Down	2.41042e-235	LOC101263891	NA	NA	NA	NA	gi|460380341|ref|XP_004235915.1|//PREDICTED: uncharacterized protein LOC101263891 [Solanum lycopersicum]
BGI_novel_G011773	4875	2472.11	667.69	-1.86446	1.92885e-234	Down	2.53985e-235	NA	NA	GO:0043531//ADP binding	GO:0006952//defense response	K07198//5'-AMP-activated protein kinase, catalytic alpha subunit [EC:2.7.11.11];K14497//protein phosphatase 2C [EC:3.1.3.16];K13453//disease resistance protein;K13457//disease resistance protein RPM1	NP_001333428.1//JJH-R-like protein [Solanum lycopersicum]
BGI_novel_G017629	852	1470.09	196.12	-2.88206	3.98718e-234	Down	5.26274e-235	NA	NA	NA	NA	NA	XP_004244866.2//PREDICTED: uncharacterized protein LOC101244211 [Solanum lycopersicum]
BGI_novel_G000410	1771	72.04	1110.29	3.97003	5.40946e-234	Up	7.15137e-235	NA	NA	NA	NA	K14411//RNA-binding protein Musashi	XP_010327634.1//PREDICTED: protein IQ-DOMAIN 14-like [Solanum lycopersicum]
BGI_novel_G019190	2029	5483.53	2526.42	-1.09398	7.65855e-234	Down	1.01327e-234	NA	NA	NA	NA	NA	XP_015087496.1//PREDICTED: exonuclease 1-like [Solanum pennellii]
101244632	2657	430.45	1951.04	2.20436	9.19311e-234	Up	1.21727e-234	LOC101244632	NA	NA	NA	K09285//AP2-like factor, ANT lineage	gi|723669678|ref|XP_010316035.1|//PREDICTED: AP2-like ethylene-responsive transcription factor ANT isoform X1 [Solanum lycopersicum]
101254050	1619	1228.87	105.77	-3.5143	9.76427e-234	Down	1.29392e-234	LOC101254050	NA	GO:0003919//FMN adenylyltransferase activity;GO:0000287//magnesium ion binding;GO:0016787//hydrolase activity;GO:0008531//riboflavin kinase activity	GO:0016310//phosphorylation;GO:0009231//riboflavin biosynthetic process	K20884//riboflavin kinase / FMN hydrolase [EC:2.7.1.26 3.1.3.102]	gi|460374001|ref|XP_004232800.1|//PREDICTED: bifunctional riboflavin kinase/FMN phosphatase [Solanum lycopersicum]
BGI_novel_G019041	5418	187.48	1413.47	2.93847	2.4512e-233	Up	3.25337e-234	NA	GO:0009570//chloroplast stroma	GO:0003729//mRNA binding	GO:0006397//mRNA processing	K10737//DNA helicase MCM8 [EC:3.6.4.12]	XP_010326020.1//PREDICTED: pentatricopeptide repeat-containing protein At3g09650, chloroplastic [Solanum lycopersicum]
101257217	1138	760.98	2573.97	1.7821	2.47344e-233	Up	3.28548e-234	LOC101257217	NA	NA	NA	K12891//splicing factor, arginine/serine-rich 2	gi|723664411|ref|XP_010315095.1|//PREDICTED: serine/arginine-rich splicing factor SC35 [Solanum lycopersicum]
543645	1261	4248.37	1718.7	-1.28156	5.55612e-233	Down	7.39185e-234	LOC543645	NA	GO:0009055//electron transfer activity	NA	K04733//interleukin-1 receptor-associated kinase 4 [EC:2.7.11.1]	gi|350535054|ref|NP_001234429.1|//dicyanin precursor [Solanum lycopersicum]
BGI_novel_G023681	3745	31.76	996.08	4.99501	5.79678e-233	Up	7.7181e-234	NA	NA	GO:0046872//metal ion binding	NA	K00232//acyl-CoA oxidase [EC:1.3.3.6];K11643//chromodomain-helicase-DNA-binding protein 4 [EC:3.6.4.12];K08343//ubiquitin-like-conjugating enzyme ATG3	XP_015058462.1//PREDICTED: uncharacterized protein LOC107004678 isoform X1 [Solanum pennellii]
101266620	2260	2185.11	524.75	-2.03397	1.46306e-232	Down	1.95106e-233	LecRK	GO:0016021//integral component of membrane;GO:0005886//plasma membrane	GO:0030246//carbohydrate binding;GO:0004674//protein serine/threonine kinase activity;GO:0005524//ATP binding	GO:0006468//protein phosphorylation	K04733//interleukin-1 receptor-associated kinase 4 [EC:2.7.11.1]	gi|460381037|ref|XP_004236259.1|//PREDICTED: L-type lectin-domain containing receptor kinase S.1 [Solanum lycopersicum]
101262122	4764	4020.94	1577.87	-1.32552	2.46171e-232	Down	3.28538e-233	LOC101262122	NA	GO:0005524//ATP binding	NA	K10875//DNA repair and recombination protein RAD54 and RAD54-like protein [EC:3.6.4.-]	gi|460390534|ref|XP_004240884.1|//PREDICTED: SNF2 domain-containing protein CLASSY 1-like [Solanum lycopersicum]
101268353	4885	195.2	1425.57	2.89255	1.04523e-231	Up	1.39825e-232	LOC101268353	NA	NA	NA	K10896//fanconi anemia group M protein;K11643//chromodomain-helicase-DNA-binding protein 4 [EC:3.6.4.12];K03580//ATP-dependent helicase HepA [EC:3.6.4.-]	gi|460376896|ref|XP_004234232.1|//PREDICTED: uncharacterized protein LOC101268353 [Solanum lycopersicum]
101245049	1307	1184.91	3285.54	1.49539	1.23631e-231	Up	1.65515e-232	LOC101245049	NA	NA	NA	K03097//casein kinase II subunit alpha [EC:2.7.11.1]	gi|970025795|ref|XP_015074207.1|//PREDICTED: uncharacterized protein LOC107018280 [Solanum pennellii]
101252714	772	540.31	2157.29	2.02139	1.35828e-231	Up	1.81986e-232	LOC101252714	NA	NA	NA	K10740//replication factor A3	gi|460402010|ref|XP_004246508.1|//PREDICTED: replication protein A 14 kDa subunit B-like [Solanum lycopersicum]
101244867	1450	3342.55	1169.09	-1.49153	7.01232e-231	Down	9.4174e-232	LOC101244867	GO:0016021//integral component of membrane	NA	GO:0055085//transmembrane transport	K07088//uncharacterized protein	gi|460385549|ref|XP_004238466.1|//PREDICTED: uncharacterized transporter YBR287W-like [Solanum lycopersicum]
101244695	3387	1601	3937	1.32216	2.04672e-230	Up	2.75085e-231	LOC101244695	NA	NA	NA	K14494//DELLA protein	gi|460400243|ref|XP_004245645.1|//PREDICTED: scarecrow-like protein 28 [Solanum lycopersicum]
BGI_novel_G022776	2184	375.22	1818.79	2.3012	1.12312e-229	Up	1.51186e-230	NA	NA	NA	NA	K13153//U11/U12 small nuclear ribonucleoprotein 25 kDa protein	XP_004250082.1//PREDICTED: U11/U12 small nuclear ribonucleoprotein 25 kDa protein isoform X1 [Solanum lycopersicum]
BGI_novel_G025668	4414	547.69	2161.79	2.00483	1.29012e-229	Up	1.73802e-230	NA	NA	NA	NA	K15502//serine/threonine-protein phosphatase 6 regulatory ankyrin repeat subunit A	XP_010314757.1//PREDICTED: uncharacterized protein LOC101263889 isoform X2 [Solanum lycopersicum]
BGI_novel_G022619	723	1138	80	-3.80632	1.64847e-229	Down	2.2225e-230	NA	GO:0009507//chloroplast	GO:0009055//electron transfer activity;GO:0046872//metal ion binding;GO:0051537//2 iron, 2 sulfur cluster binding	GO:0022900//electron transport chain	K02639//ferredoxin	XP_004249961.1//PREDICTED: ferredoxin, root R-B2-like [Solanum lycopersicum]
101055572	1495	1913.97	0	-11.8783	3.67902e-229	Down	4.9717e-230	GGP	GO:0005737//cytoplasm	GO:0080048//GDP-D-glucose phosphorylase activity	GO:0006006//glucose metabolic process	K14190//GDP-L-galactose phosphorylase [EC:2.7.7.69]	gi|525313819|ref|NP_001266145.1|//GDP-L-galactose phosphorylase [Solanum lycopersicum]
BGI_novel_G009723	2622	976.52	16	-5.90747	5.02221e-229	Down	6.79211e-230	NA	NA	NA	NA	NA	XP_004237262.1//PREDICTED: protein SIEVE ELEMENT OCCLUSION B-like [Solanum lycopersicum]
101259201	2187	5493.38	2557.93	-1.07868	5.2703e-229	Down	7.13315e-230	LOC101259201	NA	NA	NA	K01885//glutamyl-tRNA synthetase [EC:6.1.1.17]	gi|460370531|ref|XP_004231106.1|//PREDICTED: glutamate--tRNA ligase, chloroplastic/mitochondrial [Solanum lycopersicum]
104648378	750	334.54	1729.8	2.39439	5.59854e-229	Up	7.58328e-230	LOC104648378	NA	NA	NA	NA	gi|723714609|ref|XP_010323626.1|//PREDICTED: transcription factor PAR1 [Solanum lycopersicum]
543880	1657	1510.93	3785.59	1.34911	1.50353e-228	Up	2.03813e-229	MPK3	GO:0005622//intracellular	GO:0005524//ATP binding;GO:0004707//MAP kinase activity	GO:0000165//MAPK cascade	K20536//mitogen-activated protein kinase 3 [EC:2.7.11.24]	gi|350538809|ref|NP_001234360.1|//mitogen-activated protein kinase 3 [Solanum lycopersicum]
BGI_novel_G014042	4470	1165.43	91.24	-3.65102	3.20292e-228	Down	4.34511e-229	NA	NA	NA	NA	NA	XP_010322724.1//PREDICTED: uncharacterized protein LOC101265245 [Solanum lycopersicum]
BGI_novel_G021246	1049	3869.35	1501.06	-1.34208	6.46428e-228	Down	8.78305e-229	NA	NA	GO:0016874//ligase activity	NA	K02184//formin 2	XP_015089639.1//PREDICTED: uncharacterized protein LOC107032545 [Solanum pennellii]
101267934	2180	2552	729	-1.7836	7.96524e-228	Down	1.08308e-228	LOC101267934	NA	NA	NA	K15404//aldehyde decarbonylase [EC:4.1.99.5]	gi|723666679|ref|XP_004229696.2|//PREDICTED: protein ECERIFERUM 1-like [Solanum lycopersicum]
BGI_novel_G007589	5830	3076.78	6058.26	1.00152	2.22145e-227	Up	3.02296e-228	NA	NA	NA	NA	K17592//sacsin	XP_010318320.1//PREDICTED: uncharacterized protein LOC104646477 [Solanum lycopersicum]
BGI_novel_G005801	1663	3944.36	1550.57	-1.32296	2.87442e-227	Down	3.91453e-228	NA	GO:0005634//nucleus	GO:0043565//sequence-specific DNA binding;GO:0003700//DNA binding transcription factor activity	GO:0045892//negative regulation of transcription, DNA-templated;GO:0009408//response to heat	K09419//heat shock transcription factor, other eukaryote	NP_001308379.1//heat shock factor protein HSF24 [Solanum lycopersicum]
BGI_novel_G013723	1854	2568.72	739.96	-1.7715	3.59234e-227	Down	4.896e-228	NA	NA	GO:0004030//aldehyde dehydrogenase [NAD(P)+] activity	GO:0006081//cellular aldehyde metabolic process	K00128//aldehyde dehydrogenase (NAD+) [EC:1.2.1.3]	XP_009790112.1//PREDICTED: aldehyde dehydrogenase [Nicotiana sylvestris]
BGI_novel_G006086	2645	139.66	1267.21	3.2057	5.39867e-227	Up	7.3635e-228	NA	GO:0005739//mitochondrion	GO:0003723//RNA binding;GO:0009982//pseudouridine synthase activity	GO:0006396//RNA processing;GO:0006400//tRNA modification;GO:0001522//pseudouridine synthesis;GO:1990481//mRNA pseudouridine synthesis	K03177//tRNA pseudouridine55 synthase [EC:5.4.99.25]	XP_004231838.1//PREDICTED: uncharacterized protein LOC101259995 [Solanum lycopersicum]
101253166	2131	1692.5	4054.46	1.28439	6.66243e-227	Up	9.09419e-228	LOC101253166	NA	NA	NA	K13420//LRR receptor-like serine/threonine-protein kinase FLS2 [EC:2.7.11.1]	gi|460378933|ref|XP_004235221.1|//PREDICTED: protein Hook homolog 2 [Solanum lycopersicum]
101263128	6754	1249.12	123.14	-3.31851	8.89063e-227	Down	1.2145e-227	LOC101263128	NA	NA	NA	K11320//E1A-binding protein p400 [EC:3.6.4.-]	gi|460393886|ref|XP_004242539.1|//PREDICTED: uncharacterized protein LOC101263128 [Solanum lycopersicum]
BGI_novel_G014711	1772	1768.79	338.18	-2.36287	9.96102e-227	Down	1.36176e-227	NA	NA	GO:0046872//metal ion binding;GO:0016787//hydrolase activity	NA	K03426//NAD+ diphosphatase [EC:3.6.1.22]	XP_004241279.1//PREDICTED: nudix hydrolase 19, chloroplastic isoform X1 [Solanum lycopersicum]
BGI_novel_G003898	1764	2260.77	4894.03	1.13824	2.75281e-226	Up	3.76912e-227	NA	NA	GO:0003723//RNA binding	NA	K12741//heterogeneous nuclear ribonucleoprotein A1/A3	XP_015065579.1//PREDICTED: glycine-rich RNA-binding protein 4, mitochondrial-like [Solanum pennellii]
BGI_novel_G010411	1021	698.96	2421.21	1.81648	2.1661e-225	Up	2.96807e-226	NA	NA	NA	NA	K18749//protein LSM14;K01051//pectinesterase [EC:3.1.1.11]	XP_015071349.1//PREDICTED: classical arabinogalactan protein 5 [Solanum pennellii]
BGI_novel_G024085	839	2799.5	875.8	-1.65246	1.6164e-224	Down	2.21994e-225	NA	NA	NA	NA	K13944//LOB domain-containing protein 16;K21994//LOB domain-containing protein 18	XP_004251265.1//PREDICTED: LOB domain-containing protein 1 [Solanum lycopersicum]
101250126	1871	1001.37	7.2	-7.09573	1.71929e-224	Down	2.36305e-225	LOC101250126	NA	NA	NA	K13356//alcohol-forming fatty acyl-CoA reductase [EC:1.2.1.84]	gi|460391411|ref|XP_004241314.1|//PREDICTED: fatty acyl-CoA reductase 3 [Solanum lycopersicum]
BGI_novel_G018570	4482	4218.5	1736.73	-1.25632	2.45515e-224	Down	3.377e-225	NA	GO:0016021//integral component of membrane	GO:0008131//primary amine oxidase activity;GO:0005507//copper ion binding;GO:0048038//quinone binding	GO:0009308//amine metabolic process	K00276//primary-amine oxidase [EC:1.4.3.21]	XP_015084941.1//PREDICTED: primary amine oxidase-like [Solanum pennellii]
101253914	3450	1525.38	236.19	-2.66712	3.30029e-224	Down	4.54294e-225	LOC101253914	NA	NA	NA	K15032//mTERF domain-containing protein, mitochondrial	gi|723714676|ref|XP_010323636.1|//PREDICTED: uncharacterized protein LOC101253914 [Solanum lycopersicum]
101260536	1792	5930.66	2885.68	-1.01525	6.48954e-224	Down	8.93984e-225	LOC101260536	NA	NA	NA	K00517//indol-3-yl-methylglucosinolate hydroxylase [EC:1.14.-.-];K20619//cytochrome P450 family 78 subfamily A	gi|460388925|ref|XP_004240114.1|//PREDICTED: cytochrome P450 78A9-like [Solanum lycopersicum]
101244696	1426	2176.96	4753.72	1.15078	1.0395e-223	Up	1.43308e-224	LOC101244696	NA	NA	NA	K20784//arabinosyltransferase [EC:2.4.2.-];K20892//beta-arabinofuranosyltransferase [EC:2.4.2.-];K20783//arabinosyltransferase [EC:2.4.2.-]	gi|723726242|ref|XP_004246066.2|//PREDICTED: uncharacterized protein At4g15970-like [Solanum lycopersicum]
BGI_novel_G018444	3129	3393.03	1225.45	-1.44523	1.18318e-223	Down	1.63364e-224	NA	NA	GO:0071949//FAD binding	NA	K09838//zeaxanthin epoxidase [EC:1.14.15.21]	XP_015085148.1//PREDICTED: FAD-dependent urate hydroxylase-like [Solanum pennellii]
101261000	1651	5110	2328	-1.1102	3.056e-223	Down	4.22909e-224	LOC101261000	NA	NA	NA	K08726//soluble epoxide hydrolase / lipid-phosphate phosphatase [EC:3.3.2.10 3.1.3.76]	gi|460378434|ref|XP_004234977.1|//PREDICTED: uncharacterized protein LOC101261000 isoform X1 [Solanum lycopersicum]
101258780	1575	1394.93	184.72	-2.89275	4.65351e-223	Down	6.44471e-224	LOC101258780	NA	NA	NA	K14499//BRI1 kinase inhibitor 1	gi|460403798|ref|XP_004247373.1|//PREDICTED: probable membrane-associated kinase regulator 1 [Solanum lycopersicum]
BGI_novel_G012285	2516	106.15	1162.6	3.47721	4.74581e-223	Up	6.57751e-224	NA	GO:0005576//extracellular region	GO:0004650//polygalacturonase activity	GO:0005975//carbohydrate metabolic process;GO:0071555//cell wall organization	K01184//polygalacturonase [EC:3.2.1.15]	XP_009599780.1//PREDICTED: probable polygalacturonase isoform X1 [Nicotiana tomentosiformis]
101258844	1771	958.08	2859.37	1.60151	6.26547e-223	Up	8.69027e-224	LOC101258844	NA	NA	NA	K10563//formamidopyrimidine-DNA glycosylase [EC:3.2.2.23 4.2.99.18]	gi|460380310|ref|XP_004235900.1|//PREDICTED: formamidopyrimidine-DNA glycosylase isoform X1 [Solanum lycopersicum]
BGI_novel_G010630	1916	1685.32	308.52	-2.42555	8.8519e-223	Down	1.2287e-223	NA	NA	NA	NA	K11426//SET and MYND domain-containing protein	XP_004238112.1//PREDICTED: uncharacterized protein LOC101265729 [Solanum lycopersicum]
101262877	2510	2585.3	762.64	-1.73722	1.54319e-222	Down	2.1469e-223	LOC101262877	NA	GO:0005524//ATP binding;GO:0004672//protein kinase activity	GO:0006468//protein phosphorylation	K08286//protein-serine/threonine kinase [EC:2.7.11.-]	gi|460372052|ref|XP_004231848.1|//PREDICTED: serine/threonine-protein kinase D6PK [Solanum lycopersicum]
BGI_novel_G012413	3376	230.25	1470.15	2.69872	1.60142e-222	Up	2.22958e-223	NA	GO:0016021//integral component of membrane	GO:0005524//ATP binding;GO:0004672//protein kinase activity	NA	K00924//kinase [EC:2.7.1.-]	XP_004240244.1//PREDICTED: leucine-rich repeat receptor-like protein kinase TDR [Solanum lycopersicum]
101259424	2647	5187.01	2384.5	-1.09718	2.47499e-222	Down	3.45359e-223	SlVP2	NA	NA	NA	K01507//inorganic pyrophosphatase [EC:3.6.1.1]	gi|1001624455|ref|NP_001307479.1|//H+-inorganic pyrophosphatase 2 [Solanum lycopersicum]
101249654	1356	14	934.15	6.08419	2.61598e-222	Up	3.65307e-223	LOC101249654	NA	GO:0003779//actin binding	NA	K20478//golgin subfamily B member 1	gi|460393093|ref|XP_004242146.1|//PREDICTED: uncharacterized protein LOC101249654 [Solanum lycopersicum]
101253331	2010	493.69	2021.56	2.05782	3.65955e-222	Up	5.11804e-223	LOC101253331	NA	NA	NA	K03386//peroxiredoxin (alkyl hydroperoxide reductase subunit C) [EC:1.11.1.15];K19525//vacuolar protein sorting-associated protein 13A/C;K13217//pre-mRNA-processing factor 39	gi|460406753|ref|XP_004248824.1|//PREDICTED: uncharacterized protein LOC101253331 [Solanum lycopersicum]
543982	3229	1740.69	334.98	-2.35348	4.09666e-222	Down	5.73366e-223	LHA1	GO:0043231//intracellular membrane-bounded organelle;GO:0005887//integral component of plasma membrane	GO:0046872//metal ion binding;GO:0005524//ATP binding;GO:0008553//hydrogen-exporting ATPase activity, phosphorylative mechanism	GO:0006754//ATP biosynthetic process;GO:1902600//hydrogen ion transmembrane transport;GO:0051453//regulation of intracellular pH	K01535//H+-transporting ATPase [EC:3.6.3.6]	gi|350536759|ref|NP_001234775.1|//plasma membrane ATPase 1 [Solanum lycopersicum]
BGI_novel_G009078	1563	4412.5	1872.8	-1.21237	6.75775e-222	Down	9.47226e-223	NA	GO:0016021//integral component of membrane	GO:0005524//ATP binding;GO:0004672//protein kinase activity	NA	K04733//interleukin-1 receptor-associated kinase 4 [EC:2.7.11.1]	XP_010319415.1//PREDICTED: LEAF RUST 10 DISEASE-RESISTANCE LOCUS RECEPTOR-LIKE PROTEIN KINASE-like 1.1 [Solanum lycopersicum]
101247047	1620	1948.97	4405.81	1.20073	7.16462e-222	Up	1.00501e-222	LOC101247047	NA	NA	NA	K13691//pathogen-inducible salicylic acid glucosyltransferase [EC:2.4.1.-]	gi|460399057|ref|XP_004245060.1|//PREDICTED: UDP-glycosyltransferase 74F2-like [Solanum lycopersicum]
BGI_novel_G024853	4386	1255.18	3338.49	1.43533	1.76621e-221	Up	2.48123e-222	NA	NA	NA	NA	K17361//acyl-coenzyme A thioesterase 9 [EC:3.1.2.-]	XP_004251999.1//PREDICTED: acyl-coenzyme A thioesterase 9, mitochondrial isoform X1 [Solanum lycopersicum]
101258267	1727	4450.26	1899.36	-1.20434	1.8383e-221	Down	2.58443e-222	LOC101258267	NA	NA	NA	K00924//kinase [EC:2.7.1.-]	gi|460389814|ref|XP_004240543.1|//PREDICTED: aspartic proteinase Asp1 isoform X1 [Solanum lycopersicum]
101253938	944	257	1523.36	2.59145	1.11693e-220	Up	1.57379e-221	LOC101253938	GO:0005622//intracellular	GO:0032440//2-alkenal reductase [NAD(P)] activity;GO:0004871//signal transducer activity	GO:0000160//phosphorelay signal transduction system;GO:0055114//oxidation-reduction process	K14490//histidine-containing phosphotransfer peotein	gi|460368603|ref|XP_004230155.1|//PREDICTED: histidine-containing phosphotransfer protein 1 [Solanum lycopersicum]
BGI_novel_G018097	1705	4738.8	2093	-1.15492	1.29242e-220	Down	1.82241e-221	NA	GO:0016021//integral component of membrane;GO:0000139//Golgi membrane	GO:0008378//galactosyltransferase activity	GO:0006486//protein glycosylation	K20855//beta-1,3-galactosyltransferase 1/2/3/4/5/7/8 [EC:2.4.1.-]	XP_004245304.1//PREDICTED: beta-1,3-galactosyltransferase 7 [Solanum lycopersicum]
BGI_novel_G014164	1333	1319.88	3436.18	1.40443	1.31627e-220	Up	1.85741e-221	NA	NA	NA	NA	NA	XP_004241695.1//PREDICTED: myb-like protein O [Solanum lycopersicum]
101261484	1397	456.32	1939.89	2.11189	2.20231e-220	Up	3.11235e-221	LOC101261484	NA	NA	NA	NA	gi|460411153|ref|XP_004250979.1|//PREDICTED: uncharacterized protein LOC101261484 isoform X1 [Solanum lycopersicum]
BGI_novel_G000411	1389	72.73	1058.35	3.88716	3.63678e-220	Up	5.14339e-221	NA	NA	NA	NA	K14411//RNA-binding protein Musashi	XP_010327634.1//PREDICTED: protein IQ-DOMAIN 14-like [Solanum lycopersicum]
BGI_novel_G001439	1158	187.22	1357.92	2.88263	4.82938e-220	Up	6.83511e-221	NA	GO:0016020//membrane;GO:0005622//intracellular	GO:0005525//GTP binding;GO:0003924//GTPase activity	GO:0007264//small GTPase mediated signal transduction	K04392//Ras-related C3 botulinum toxin substrate 1	XP_004229725.1//PREDICTED: rac-like GTP-binding protein 5 [Solanum lycopersicum]
101247078	1279	1016.11	51.78	-4.27048	1.06702e-219	Down	1.51129e-220	LOC101247078	NA	NA	NA	K17872//NADH:ubiquinone reductase (non-electrogenic) [EC:1.6.5.9];K13258//2-hydroxyisoflavanone dehydratase [EC:4.2.1.105];K20506//tuliposide A-converting enzyme [EC:4.2.99.22]	gi|460406573|ref|XP_004248737.1|//PREDICTED: 2-hydroxyisoflavanone dehydratase-like [Solanum lycopersicum]
BGI_novel_G013718	1402	1172.29	3194.08	1.4701	1.2161e-219	Up	1.72499e-220	NA	GO:0005634//nucleus;GO:0005663//DNA replication factor C complex	GO:0003677//DNA binding;GO:0005524//ATP binding	GO:0006281//DNA repair;GO:0006260//DNA replication;GO:0006261//DNA-dependent DNA replication;GO:0031348//negative regulation of defense response	K10756//replication factor C subunit 3/5	XP_004242038.1//PREDICTED: replication factor C subunit 3 [Solanum lycopersicum]
BGI_novel_G006689	1798	571	2156	1.94083	1.66481e-219	Up	2.36496e-220	NA	GO:0005634//nucleus	NA	NA	K21777//G2/mitotic-specific cyclin-B, other	XP_010317683.1//PREDICTED: G2/mitotic-specific cyclin-2-like [Solanum lycopersicum]
BGI_novel_G001284	2809	5225.97	2425.92	-1.08313	2.15375e-219	Down	3.06179e-220	NA	NA	GO:0046872//metal ion binding	NA	K15172//transcription elongation factor SPT5;K07560//D-tyrosyl-tRNA(Tyr) deacylase [EC:3.1.-.-];K13126//polyadenylate-binding protein	XP_004229627.1//PREDICTED: zinc finger CCCH domain-containing protein 30-like [Solanum lycopersicum]
101264595	1900	2133	532	-1.97935	3.39996e-219	Down	4.83697e-220	LOC101264595	NA	NA	NA	K03327//multidrug resistance protein, MATE family	gi|460377145|ref|XP_004234355.1|//PREDICTED: MATE efflux family protein 5 [Solanum lycopersicum]
101253746	5785	2845.26	5669.01	1.01857	7.56361e-219	Up	1.07684e-219	LOC101253746	GO:0055028//cortical microtubule;GO:0009524//phragmoplast;GO:0009574//preprophase band	NA	NA	K17550//protein phosphatase 1 regulatory subunit 7	gi|460374690|ref|XP_004233143.1|//PREDICTED: 187-kDa microtubule-associated protein AIR9 [Solanum lycopersicum]
BGI_novel_G010198	1118	29.76	934.7	4.99709	9.7356e-219	Up	1.3881e-219	NA	NA	NA	NA	NA	XP_004238488.1//PREDICTED: uncharacterized protein LOC101252389 [Solanum lycopersicum]
101260027	1432	1413.01	3570.39	1.36134	1.24681e-218	Up	1.77901e-219	LOC101260027	NA	NA	NA	K14505//cyclin D3, plant	gi|460414803|ref|XP_004252752.1|//PREDICTED: cyclin-D3-3-like [Solanum lycopersicum]
101263739	1034	70.95	1045.83	3.90573	2.98379e-218	Up	4.26368e-219	LOC101263739	NA	NA	NA	K17345//tetraspanin-5;K17294//tetraspanin-4	gi|460400201|ref|XP_004245624.1|//PREDICTED: tetraspanin-10 isoform X1 [Solanum lycopersicum]
109119180	481	1897.8	418.16	-2.15817	6.23426e-218	Down	8.93456e-219	LOC109119180	NA	NA	NA	NA	gi|697111997|ref|XP_009609874.1|//PREDICTED: uncharacterized protein LOC104103660 [Nicotiana tomentosiformis]
BGI_novel_G008974	1336	4586.12	2004.91	-1.1697	6.51424e-218	Down	9.34265e-219	NA	NA	GO:0016866//intramolecular transferase activity	GO:0030244//cellulose biosynthetic process	K13379//reversibly glycosylated polypeptide / UDP-arabinopyranose mutase [EC:2.4.1.- 5.4.99.30]	XP_009791765.1//PREDICTED: alpha-1,4-glucan-protein synthase [UDP-forming] 2 [Nicotiana sylvestris]
101262337	1125	17.49	911.5	5.72767	1.45457e-217	Up	2.08766e-218	LOC101262337	NA	NA	NA	NA	gi|460365395|ref|XP_004228588.1|//PREDICTED: uncharacterized protein LOC101262337 isoform X1 [Solanum lycopersicum]
101245189	1371	660.05	2308.04	1.83005	4.01984e-217	Up	5.77785e-218	LOC101245189	NA	NA	NA	K08850//aurora kinase, other [EC:2.7.11.1]	gi|460399211|ref|XP_004245135.1|//PREDICTED: serine/threonine-protein kinase Aurora-2 [Solanum lycopersicum]
543574	711	140.91	1229.02	3.1487	1.03595e-216	Up	1.49009e-217	ASR1	GO:0005634//nucleus;GO:0005829//cytosol	NA	GO:0006950//response to stress	NA	gi|350539427|ref|NP_001234137.1|//abscisic stress-ripening protein 1 [Solanum lycopersicum]
BGI_novel_G013205	2157	3077.09	1062.96	-1.50945	1.92575e-216	Down	2.77198e-217	NA	GO:0016021//integral component of membrane;GO:0005886//plasma membrane	GO:0005516//calmodulin binding	GO:0006952//defense response;GO:0009607//response to biotic stimulus	K08472//mlo protein	XP_004240581.1//PREDICTED: MLO-like protein 6 [Solanum lycopersicum]
BGI_novel_G011931	2433	288.78	1574.08	2.4705	3.81739e-216	Up	5.49887e-217	NA	GO:0005634//nucleus;GO:0005658//alpha DNA polymerase:primase complex;GO:0005739//mitochondrion	GO:0003887//DNA-directed DNA polymerase activity;GO:0003677//DNA binding;GO:0046982//protein heterodimerization activity	GO:0006260//DNA replication;GO:0006270//DNA replication initiation	K02321//DNA polymerase alpha subunit B	XP_004239184.1//PREDICTED: DNA polymerase alpha subunit B [Solanum lycopersicum]
BGI_novel_G002162	3434	801.7	2551.05	1.69399	1.45575e-215	Up	2.09851e-216	NA	NA	GO:0033947//mannosylglycoprotein endo-beta-mannosidase activity	GO:0005975//carbohydrate metabolic process	K18577//mannosylglycoprotein endo-beta-mannosidase [EC:3.2.1.152]	XP_004230200.1//PREDICTED: mannosylglycoprotein endo-beta-mannosidase [Solanum lycopersicum]
BGI_novel_G011552	1398	1367.92	3480.53	1.37136	1.50726e-215	Up	2.17434e-216	NA	GO:0097708//intracellular vesicle;GO:0016021//integral component of membrane;GO:0005886//plasma membrane	GO:0005215//transporter activity	GO:0010336//gibberellic acid homeostasis	K14638//solute carrier family 15 (peptide/histidine transporter), member 3/4	XP_004238938.1//PREDICTED: protein NRT1/ PTR FAMILY 3.1 [Solanum lycopersicum]
BGI_novel_G004954	4213	0	1741.56	11.7902	1.81356e-215	Up	2.6181e-216	NA	GO:0005694//chromosome	GO:0003677//DNA binding;GO:0003917//DNA topoisomerase type I activity	GO:0006265//DNA topological change	K03168//DNA topoisomerase I [EC:5.99.1.2]	XP_004233765.1//PREDICTED: uncharacterized protein LOC101248941 isoform X2 [Solanum lycopersicum]
BGI_novel_G007549	3103	458.56	1919.97	2.08993	2.79755e-215	Up	4.04447e-216	NA	NA	NA	NA	K01872//alanyl-tRNA synthetase [EC:6.1.1.7]	XP_004235329.1//PREDICTED: mediator of RNA polymerase II transcription subunit 9 [Solanum lycopersicum]
BGI_novel_G008632	1102	79.56	1058.56	3.75795	2.8134e-215	Up	4.07034e-216	NA	GO:0016021//integral component of membrane	NA	NA	NA	XP_004235721.2//PREDICTED: uncharacterized protein LOC101253985 [Solanum lycopersicum]
101264088	1339	3867.6	1553.23	-1.29213	5.84461e-215	Down	8.47418e-216	LOC101264088	NA	NA	NA	K13420//LRR receptor-like serine/threonine-protein kinase FLS2 [EC:2.7.11.1]	gi|460410912|ref|XP_004250859.1|//PREDICTED: DNA-damage-repair/toleration protein DRT100 [Solanum lycopersicum]
101252072	1917	1068.51	2992.08	1.50958	4.79208e-214	Up	6.99332e-215	LOC101252072	GO:0016021//integral component of membrane	GO:0005524//ATP binding;GO:0004672//protein kinase activity	GO:0006468//protein phosphorylation	K04733//interleukin-1 receptor-associated kinase 4 [EC:2.7.11.1]	gi|985482018|ref|NP_001306257.1|//leucine-rich repeat receptor-like serine/threonine/tyrosine-protein kinase SOBIR1 precursor [Solanum lycopersicum]
101253333	3976	3483.49	1318.85	-1.37722	1.43582e-213	Down	2.10138e-214	LOC101253333	NA	NA	NA	K17964//leucine-rich PPR motif-containing protein, mitochondrial;K17710//pentatricopeptide repeat domain-containing protein 1	gi|460371235|ref|XP_004231448.1|//PREDICTED: pentatricopeptide repeat-containing protein MRL1, chloroplastic isoform X1 [Solanum lycopersicum]
101265729	1952	2035.68	4468.48	1.15831	1.39419e-212	Up	2.04776e-213	LOC101265729	NA	NA	NA	K11426//SET and MYND domain-containing protein	gi|460384832|ref|XP_004238112.1|//PREDICTED: uncharacterized protein LOC101265729 [Solanum lycopersicum]
BGI_novel_G009068	3572	2495.69	744.08	-1.72188	2.97239e-212	Down	4.37203e-213	NA	GO:0044614//nuclear pore cytoplasmic filaments	GO:0003723//RNA binding;GO:0005487//nucleocytoplasmic transporter activity;GO:0017056//structural constituent of nuclear pore;GO:0008139//nuclear localization sequence binding	GO:0034398//telomere tethering at nuclear periphery;GO:0006606//protein import into nucleus;GO:0000973//posttranscriptional tethering of RNA polymerase II gene DNA at nuclear periphery;GO:0006405//RNA export from nucleus	K14297//nuclear pore complex protein Nup98-Nup96	XP_004236952.1//PREDICTED: nuclear pore complex protein NUP98A isoform X1 [Solanum lycopersicum]
101247695	1594	646.44	2258.16	1.82859	3.08569e-212	Up	4.54192e-213	LOC101247695	NA	NA	NA	NA	gi|460412005|ref|XP_004251394.1|//PREDICTED: methyl-CpG-binding domain-containing protein 11-like [Solanum lycopersicum]
BGI_novel_G001029	2675	288.56	1556.23	2.45515	3.32317e-212	Up	4.89845e-213	NA	GO:0048046//apoplast;GO:0005737//cytoplasm	GO:0004674//protein serine/threonine kinase activity;GO:0005524//ATP binding;GO:0004672//protein kinase activity	GO:0023014//signal transduction by protein phosphorylation;GO:0043622//cortical microtubule organization;GO:0007346//regulation of mitotic cell cycle;GO:0032147//activation of protein kinase activity;GO:0031098//stress-activated protein kinase signaling cascade;GO:0046777//protein autophosphorylation	K20606//mitogen-activated protein kinase kinase kinase ANP1 [EC:2.7.11.25]	XP_004229416.1//PREDICTED: mitogen-activated protein kinase kinase kinase NPK1 [Solanum lycopersicum]
101249788	1185	3180.17	1140.63	-1.45524	6.77659e-212	Down	1.00031e-212	LOC101249788	NA	NA	NA	NA	gi|460411077|ref|XP_004250941.1|//PREDICTED: uncharacterized protein LOC101249788 [Solanum lycopersicum]
BGI_novel_G010157	825	1902.72	434.86	-2.10541	7.87586e-212	Down	1.1634e-212	NA	NA	NA	NA	NA	XP_004237745.1//PREDICTED: pathogen-related protein [Solanum lycopersicum]
101253826	1564	1663.92	322	-2.34542	1.53381e-211	Down	2.27053e-212	LOC101253826	NA	GO:0004190//aspartic-type endopeptidase activity	GO:0006508//proteolysis	K00924//kinase [EC:2.7.1.-]	gi|460367134|ref|XP_004229430.1|//PREDICTED: basic 7S globulin-like [Solanum lycopersicum]
BGI_novel_G010755	2004	1704.79	341.57	-2.29531	3.25149e-211	Down	4.83369e-212	NA	GO:0016020//membrane;GO:0016021//integral component of membrane	GO:0016709//oxidoreductase activity, acting on paired donors, with incorporation or reduction of molecular oxygen, NAD(P)H as one donor, and incorporation of one atom of oxygen;GO:0020037//heme binding;GO:0005506//iron ion binding	GO:0044550//secondary metabolite biosynthetic process	K14985//26-hydroxylase [EC:1.14.-.-];K00512//steroid 17alpha-monooxygenase / 17alpha-hydroxyprogesterone deacetylase [EC:1.14.14.19 1.14.14.32];K07408//cytochrome P450 family 1 subfamily A polypeptide 1 [EC:1.14.14.1]	XP_004238200.1//PREDICTED: cytochrome P450 CYP82D47-like [Solanum lycopersicum]
101259641	1459	1185	3164.03	1.44091	3.25282e-211	Up	4.83908e-212	LOC101259641	NA	NA	NA	K16222//Dof zinc finger protein DOF5.5	gi|460391308|ref|XP_004241265.1|//PREDICTED: dof zinc finger protein DOF2.1 [Solanum lycopersicum]
101257710	1187	699	2347	1.77149	3.56836e-211	Up	5.31224e-212	LOC101257710	NA	NA	NA	K04733//interleukin-1 receptor-associated kinase 4 [EC:2.7.11.1]	gi|460405194|ref|XP_004248061.1|//PREDICTED: pollen-specific leucine-rich repeat extensin-like protein 1 [Solanum lycopersicum]
BGI_novel_G024639	2224	356.44	1695.03	2.27361	4.24851e-211	Up	6.32923e-212	NA	GO:0005871//kinesin complex	GO:0005524//ATP binding;GO:0003777//microtubule motor activity;GO:0008017//microtubule binding;GO:0016887//ATPase activity	GO:0007018//microtubule-based movement	K10406//kinesin family member C2/C3	XP_010313879.1//PREDICTED: uncharacterized protein LOC101255070 isoform X5 [Solanum lycopersicum]
101245933	917	5588.5	2722.12	-1.0137	1.42181e-210	Down	2.11964e-211	LOC101245933	GO:0009505//plant-type cell wall;GO:0046658//anchored component of plasma membrane	GO:0001872//(1->3)-beta-D-glucan binding;GO:0004553//hydrolase activity, hydrolyzing O-glycosyl compounds	GO:0052543//callose deposition in cell wall;GO:0009408//response to heat	K19891//glucan endo-1,3-beta-glucosidase 1/2/3 [EC:3.2.1.39]	gi|460380558|ref|XP_004236022.1|//PREDICTED: PLASMODESMATA CALLOSE-BINDING PROTEIN 3 [Solanum lycopersicum]
BGI_novel_G019409	2132	5406.42	2596.57	-1.03403	1.76138e-210	Down	2.62955e-211	NA	NA	NA	NA	K09562//hsp70-interacting protein	XP_004246423.1//PREDICTED: hsp70-binding protein 1 [Solanum lycopersicum]
BGI_novel_G008522	1273	1853.36	4185.03	1.19913	2.11757e-210	Up	3.16354e-211	NA	GO:0016021//integral component of membrane	NA	NA	K17964//leucine-rich PPR motif-containing protein, mitochondrial	XP_010318632.1//PREDICTED: uncharacterized GPI-anchored protein At4g28100 [Solanum lycopersicum]
101249358	1351	1894.04	434.01	-2.10163	2.13314e-210	Down	3.18904e-211	LOC101249358	NA	NA	NA	NA	gi|460386450|ref|XP_004238911.1|//PREDICTED: uncharacterized protein LOC101249358 [Solanum lycopersicum]
101266182	1023	4383.89	1909.54	-1.17495	7.32877e-210	Down	1.09872e-210	LOC101266182	GO:0010287//plastoglobule;GO:0009535//chloroplast thylakoid membrane;GO:0009523//photosystem II;GO:0016021//integral component of membrane;GO:0009941//chloroplast envelope;GO:0009522//photosystem I	GO:0031409//pigment binding;GO:0046872//metal ion binding;GO:0016168//chlorophyll binding	GO:0009768//photosynthesis, light harvesting in photosystem I;GO:0009416//response to light stimulus;GO:0018298//protein-chromophore linkage	K08912//light-harvesting complex II chlorophyll a/b binding protein 1	gi|460374606|ref|XP_004233101.1|//PREDICTED: chlorophyll a-b binding protein 1B, chloroplastic-like [Solanum lycopersicum]
BGI_novel_G024009	1614	1697.05	0	-11.7048	1.12013e-209	Down	1.68163e-210	NA	NA	GO:0016844//strictosidine synthase activity	GO:0009058//biosynthetic process	K21407//adipocyte plasma membrane-associated protein	XP_006361111.1//PREDICTED: protein STRICTOSIDINE SYNTHASE-LIKE 3 [Solanum tuberosum]
BGI_novel_G019972	2668	349.49	1672.17	2.28243	3.02841e-209	Up	4.55921e-210	NA	GO:0005794//Golgi apparatus;GO:0016021//integral component of membrane	GO:0005457//GDP-fucose transmembrane transporter activity	NA	K15281//solute carrier family 35;K15356//GDP-mannose transporter	XP_004247196.1//PREDICTED: GDP-mannose transporter GONST4 isoform X2 [Solanum lycopersicum]
BGI_novel_G008068	1775	4312.99	1866.28	-1.18449	3.80072e-209	Down	5.72588e-210	NA	NA	GO:0046872//metal ion binding;GO:0016853//isomerase activity;GO:0030145//manganese ion binding;GO:0070402//NADPH binding;GO:0030604//1-deoxy-D-xylulose-5-phosphate reductoisomerase activity	GO:0008299//isoprenoid biosynthetic process;GO:0051484//isopentenyl diphosphate biosynthetic process, methylerythritol 4-phosphate pathway involved in terpenoid biosynthetic process	K00099//1-deoxy-D-xylulose-5-phosphate reductoisomerase [EC:1.1.1.267]	NP_001234553.2//1-deoxy-D-xylulose-5-phosphate reductoisomerase [Solanum lycopersicum]
BGI_novel_G009452	1646	175.05	1283.02	2.89774	4.38948e-209	Up	6.61746e-210	NA	GO:0016021//integral component of membrane	GO:0019706//protein-cysteine S-palmitoyltransferase activity	NA	K16675//palmitoyltransferase ZDHHC9/14/18 [EC:2.3.1.225]	NP_001316322.1//DHHC-type zinc finger family protein [Solanum lycopersicum]
BGI_novel_G006929	1582	1089.3	2.46	-8.76649	5.02819e-209	Down	7.58564e-210	NA	GO:0016021//integral component of membrane;GO:0009941//chloroplast envelope	GO:0016765//transferase activity, transferring alkyl or aryl (other than methyl) groups;GO:0010356//homogentisate geranylgeranyltransferase activity;GO:0010357//homogentisate solanesyltransferase activity;GO:0010355//homogentisate farnesyltransferase activity	GO:0010236//plastoquinone biosynthetic process;GO:0016117//carotenoid biosynthetic process	K12501//homogentisate solanesyltransferase [EC:2.5.1.117]	XP_015070527.1//PREDICTED: homogentisate solanesyltransferase, chloroplastic [Solanum pennellii]
BGI_novel_G000940	3003	4993.32	2321.81	-1.08072	5.93942e-209	Down	8.96657e-210	NA	NA	GO:0005516//calmodulin binding	NA	K20478//golgin subfamily B member 1	XP_004229158.1//PREDICTED: midasin [Solanum lycopersicum]
BGI_novel_G003045	7058	894.06	2672.06	1.60354	7.98864e-209	Up	1.20686e-209	NA	NA	NA	NA	K10400//kinesin family member 15	XP_010315270.1//PREDICTED: kinesin-like protein KIN-12D isoform X1 [Solanum lycopersicum]
101254095	1203	2742.15	893.93	-1.59304	9.0689e-209	Down	1.37101e-209	LOC101254095	NA	NA	NA	NA	gi|460388548|ref|XP_004239929.1|//PREDICTED: uncharacterized protein LOC101254095 [Solanum lycopersicum]
BGI_novel_G016496	6295	889.16	19.31	-5.50099	2.41501e-208	Down	3.65601e-209	NA	GO:0016021//integral component of membrane;GO:0000148//1,3-beta-D-glucan synthase complex	GO:0003843//1,3-beta-D-glucan synthase activity	GO:0006075//(1->3)-beta-D-glucan biosynthetic process	K11000//callose synthase [EC:2.4.1.-]	XP_019261950.1//PREDICTED: callose synthase 7-like [Nicotiana attenuata]
BGI_novel_G017746	1434	310.38	1585	2.37641	3.98128e-208	Up	6.03964e-209	NA	NA	NA	NA	NA	XP_015083652.1//PREDICTED: uncharacterized protein LOC107027013 [Solanum pennellii]
101249925	1416	202.86	1343.63	2.75161	1.0566e-207	Up	1.60397e-208	LOC101249925	NA	NA	NA	NA	gi|460389588|ref|XP_004240433.1|//PREDICTED: putative B3 domain-containing protein At5g58280 [Solanum lycopersicum]
BGI_novel_G022493	804	1246.42	151.72	-3.01427	1.30439e-207	Down	1.98287e-208	NA	NA	NA	NA	NA	XP_004249877.1//PREDICTED: citrate-binding protein-like [Solanum lycopersicum]
BGI_novel_G006671	1672	2983.38	1040.31	-1.4959	3.77224e-207	Down	5.74626e-208	NA	GO:0000812//Swr1 complex;GO:0035267//NuA4 histone acetyltransferase complex;GO:0005634//nucleus;GO:0031011//Ino80 complex;GO:0097255//R2TP complex	GO:0005524//ATP binding;GO:0043141//ATP-dependent 5'-3' DNA helicase activity;GO:0004003//ATP-dependent DNA helicase activity	GO:0006357//regulation of transcription from RNA polymerase II promoter;GO:0006338//chromatin remodeling;GO:0006355//regulation of transcription, DNA-templated;GO:0016573//histone acetylation;GO:0006351//transcription, DNA-templated;GO:0000492//box C/D snoRNP assembly	K11338//RuvB-like protein 2 [EC:3.6.4.12]	XP_004234506.1//PREDICTED: ruvB-like 2 [Solanum lycopersicum]
BGI_novel_G010246	4286	2714.27	883.84	-1.59467	5.73694e-207	Down	8.7451e-208	NA	NA	NA	GO:2000028//regulation of photoperiodism, flowering	K12124//GIGANTEA	XP_004237832.1//PREDICTED: protein GIGANTEA [Solanum lycopersicum]
101264985	2791	348.74	1660.09	2.27507	6.07414e-207	Up	9.26549e-208	LOC101264985	NA	NA	NA	K10406//kinesin family member C2/C3	gi|460370871|ref|XP_004231272.1|//PREDICTED: kinesin-4 isoform X1 [Solanum lycopersicum]
BGI_novel_G021095	1043	290.78	1536.42	2.42561	1.20226e-206	Up	1.83897e-207	NA	GO:0016021//integral component of membrane;GO:0036513//Derlin-1 retrotranslocation complex	GO:0046872//metal ion binding;GO:0044390//ubiquitin-like protein conjugating enzyme binding;GO:1904264//ubiquitin protein ligase activity involved in ERAD pathway;GO:0016874//ligase activity	GO:0071712//ER-associated misfolded protein catabolic process;GO:0042787//protein ubiquitination involved in ubiquitin-dependent protein catabolic process	K10666//E3 ubiquitin-protein ligase RNF5 [EC:2.3.2.27]	XP_004248161.1//PREDICTED: E3 ubiquitin-protein ligase RMA1H1 [Solanum lycopersicum]
101246352	2000	1912.86	452.84	-2.05462	1.8511e-206	Down	2.83531e-207	LOC101246352	GO:0005634//nucleus;GO:0005737//cytoplasm	GO:0004674//protein serine/threonine kinase activity;GO:0005524//ATP binding	GO:0006468//protein phosphorylation;GO:0035556//intracellular signal transduction	K04688//ribosomal protein S6 kinase beta [EC:2.7.11.1]	gi|995970167|ref|NP_001307141.1|//serine/threonine-protein kinase AtPK1/AtPK6 [Solanum lycopersicum]
101255079	2176	2630.03	839.22	-1.62393	6.98216e-206	Down	1.07531e-206	LOC101255079	NA	GO:0005516//calmodulin binding	GO:0006950//response to stress	K04733//interleukin-1 receptor-associated kinase 4 [EC:2.7.11.1]	gi|723687427|ref|XP_010318928.1|//PREDICTED: uncharacterized protein LOC101255079 isoform X2 [Solanum lycopersicum]
BGI_novel_G019946	2447	2189.69	4639.84	1.10738	2.07563e-205	Up	3.20533e-206	NA	NA	NA	NA	K14319//Ran GTPase-activating protein 1	XP_004247164.1//PREDICTED: RAN GTPase-activating protein 1 [Solanum lycopersicum]
BGI_novel_G015871	1121	2049.8	525.24	-1.9404	2.64647e-205	Down	4.09241e-206	NA	GO:0016021//integral component of membrane	NA	NA	K06890//uncharacterized protein	XP_004243681.1//PREDICTED: BI1-like protein isoform X2 [Solanum lycopersicum]
BGI_novel_G015876	3173	42.08	913.13	4.46365	3.0653e-205	Up	4.74329e-206	NA	GO:0009506//plasmodesma;GO:0005874//microtubule;GO:0005871//kinesin complex	GO:0005524//ATP binding;GO:0003777//microtubule motor activity;GO:0008017//microtubule binding;GO:0016887//ATPase activity	GO:0007112//male meiosis cytokinesis;GO:0000911//cytokinesis by cell plate formation;GO:0007018//microtubule-based movement;GO:0009555//pollen development;GO:0009558//embryo sac cellularization;GO:0010245//radial microtubular system formation	K11498//centromeric protein E	XP_010323978.1//PREDICTED: kinesin-like protein NACK2 [Solanum lycopersicum]
BGI_novel_G001723	3861	980.92	2795.12	1.53474	5.82396e-205	Up	9.02428e-206	NA	NA	NA	NA	NA	XP_010326456.1//PREDICTED: uncharacterized protein LOC101249582 isoform X4 [Solanum lycopersicum]
BGI_novel_G012883	2024	2614	833.87	-1.62433	1.03431e-204	Down	1.60484e-205	NA	GO:0005622//intracellular	GO:0005524//ATP binding;GO:0004707//MAP kinase activity	NA	K20536//mitogen-activated protein kinase 3 [EC:2.7.11.24]	XP_017616979.1//PREDICTED: mitogen-activated protein kinase 3 [Gossypium arboreum]
BGI_novel_G024195	768	1405.81	3470.83	1.32791	1.06829e-204	Up	1.65869e-205	NA	GO:0005634//nucleus;GO:0000790//nuclear chromatin;GO:0000786//nucleosome	GO:0003677//DNA binding;GO:0046982//protein heterodimerization activity	GO:0006342//chromatin silencing	K11251//histone H2A	XP_004251480.1//PREDICTED: histone H2A.6 [Solanum lycopersicum]
BGI_novel_G002812	1131	482.37	1911.88	2.01081	4.60688e-204	Up	7.16256e-205	NA	GO:0019898//extrinsic component of membrane;GO:0009654//photosystem II oxygen evolving complex	GO:0005509//calcium ion binding	GO:0015979//photosynthesis	K02717//photosystem II oxygen-evolving enhancer protein 2;K17892//ferredoxin-thioredoxin reductase catalytic chain [EC:1.8.7.2]	XP_004230618.1//PREDICTED: psbP domain-containing protein 1, chloroplastic isoform X1 [Solanum lycopersicum]
101268254	1656	4376.84	1933.18	-1.15488	6.83274e-204	Down	1.06304e-204	LOC101268254	NA	NA	NA	K13495//cis-zeatin O-glucosyltransferase [EC:2.4.1.215]	gi|460411198|ref|XP_004251001.1|//PREDICTED: zeatin O-glucosyltransferase-like [Solanum lycopersicum]
BGI_novel_G020469	1668	1839.97	424.17	-2.09293	2.23858e-203	Down	3.49686e-204	NA	NA	GO:0008168//methyltransferase activity	GO:0008610//lipid biosynthetic process	K00574//cyclopropane-fatty-acyl-phospholipid synthase [EC:2.1.1.79]	XP_015086474.1//PREDICTED: tuberculostearic acid methyltransferase UfaA1-like isoform X3 [Solanum pennellii]
BGI_novel_G010953	1030	1950.29	4278.31	1.15739	2.33281e-203	Up	3.6465e-204	NA	NA	NA	NA	K11294//nucleolin	XP_004238361.1//PREDICTED: probable replication factor C subunit 1 [Solanum lycopersicum]
101246367	1541	885.56	28.27	-4.94521	2.35074e-203	Down	3.67701e-204	LOC101246367	NA	NA	NA	NA	gi|723655820|ref|XP_010316007.1|//PREDICTED: probable plastid-lipid-associated protein 12, chloroplastic [Solanum lycopersicum]
BGI_novel_G020309	2260	2519.79	785.26	-1.65803	3.11583e-203	Down	4.88681e-204	NA	GO:0016021//integral component of membrane	GO:0008271//secondary active sulfate transmembrane transporter activity	NA	K17471//sulfate transporter 3	XP_019180464.1//PREDICTED: sulfate transporter 3.1-like [Ipomoea nil]
104645972	2652	1380.03	3421	1.33375	3.85632e-203	Up	6.05222e-204	LOC104645972	NA	GO:0005524//ATP binding;GO:0004386//helicase activity	NA	K19001//ATP-dependent DNA helicase	XP_004233969.1//PREDICTED: ATP-dependent DNA helicase DDM1-like [Solanum lycopersicum]
BGI_novel_G016935	5995	299.43	1534.28	2.3813	5.20756e-202	Up	8.2275e-203	NA	NA	NA	NA	K10750//chromatin assembly factor 1 subunit A;K03243//translation initiation factor 5B	XP_010324254.1//PREDICTED: uncharacterized protein LOC104648544 isoform X3 [Solanum lycopersicum]
101245996	3041	166.51	1231.97	2.91132	9.14837e-202	Up	1.44632e-202	LOC101245996	NA	NA	NA	K17679//ATP-dependent RNA helicase MSS116, mitochondrial [EC:3.6.4.13]	gi|723661528|ref|XP_010326989.1|//PREDICTED: DEAD-box ATP-dependent RNA helicase 31-like [Solanum lycopersicum]
BGI_novel_G000287	1497	4273.56	1875.25	-1.16432	1.04079e-201	Down	1.64654e-202	NA	NA	NA	NA	NA	XP_009595223.1//PREDICTED: uncharacterized protein LOC104091560 [Nicotiana tomentosiformis]
101263895	2738	561.36	2048.02	1.89126	1.40588e-201	Up	2.22559e-202	LOC101263895	NA	NA	NA	NA	gi|723685461|ref|XP_010318582.1|//PREDICTED: uncharacterized protein LOC101263895 [Solanum lycopersicum]
101247817	4217	1790.22	404.67	-2.12129	2.62332e-201	Down	4.16661e-202	LOC101247817	NA	NA	NA	K12600//superkiller protein 3	gi|723696486|ref|XP_010320493.1|//PREDICTED: tetratricopeptide repeat protein 37 [Solanum lycopersicum]
101268142	2268	4289.74	1888.69	-1.15947	3.92419e-201	Down	6.2369e-202	LOC101268142	NA	NA	NA	K02434//aspartyl-tRNA(Asn)/glutamyl-tRNA(Gln) amidotransferase subunit B [EC:6.3.5.6 6.3.5.7]	gi|723732663|ref|XP_010326798.1|//PREDICTED: glutamyl-tRNA(Gln) amidotransferase subunit B, chloroplastic/mitochondrial [Solanum lycopersicum]
BGI_novel_G001407	2292	2840.24	977	-1.51555	4.15377e-201	Down	6.60615e-202	NA	GO:0016021//integral component of membrane	GO:0005506//iron ion binding;GO:0016491//oxidoreductase activity	GO:0008610//lipid biosynthetic process	K15404//aldehyde decarbonylase [EC:4.1.99.5]	XP_015167403.1//PREDICTED: protein ECERIFERUM 1-like [Solanum tuberosum]
BGI_novel_G005015	2456	1783.44	402.95	-2.12196	1.24601e-200	Down	1.98427e-201	NA	GO:0005634//nucleus;GO:0005737//cytoplasm	GO:0004674//protein serine/threonine kinase activity;GO:0005524//ATP binding	GO:0050684//regulation of mRNA processing;GO:0000245//spliceosomal complex assembly;GO:0035556//intracellular signal transduction	K08832//serine/threonine-protein kinase SRPK3 [EC:2.7.11.1]	XP_004232572.1//PREDICTED: SRSF protein kinase 1-like [Solanum lycopersicum]
BGI_novel_G000622	1162	2008.91	516.83	-1.93462	1.86462e-200	Down	2.9733e-201	NA	NA	NA	NA	K02356//elongation factor P	XP_004228964.1//PREDICTED: uncharacterized protein LOC101264248 isoform X1 [Solanum lycopersicum]
101263216	1247	2271.91	656.5	-1.76701	1.97391e-200	Down	3.15171e-201	LOC101263216	NA	NA	NA	NA	gi|460389680|ref|XP_004240478.1|//PREDICTED: protein FLUORESCENT IN BLUE LIGHT, chloroplastic isoform X1 [Solanum lycopersicum]
101267332	3041	1878.58	450.89	-2.03476	2.74276e-200	Down	4.38221e-201	LOC101267332	NA	NA	NA	K01533//Cu2+-exporting ATPase [EC:3.6.3.4]	gi|460399025|ref|XP_004245045.1|//PREDICTED: copper-transporting ATPase PAA2, chloroplastic [Solanum lycopersicum]
BGI_novel_G004829	1522	2395.95	4895.14	1.05479	2.80079e-200	Up	4.47786e-201	NA	NA	NA	NA	K20855//beta-1,3-galactosyltransferase 1/2/3/4/5/7/8 [EC:2.4.1.-]	XP_004232713.1//PREDICTED: uncharacterized protein LOC101253959 [Solanum lycopersicum]
BGI_novel_G009949	3081	1145.28	3034.01	1.42956	3.06265e-200	Up	4.90294e-201	NA	GO:0016021//integral component of membrane;GO:0009941//chloroplast envelope	NA	GO:0009644//response to high light intensity;GO:0007623//circadian rhythm;GO:0010150//leaf senescence;GO:0042542//response to hydrogen peroxide;GO:0055072//iron ion homeostasis;GO:0046686//response to cadmium ion;GO:1990641//response to iron ion starvation;GO:0034599//cellular response to oxidative stress;GO:1901031//regulation of response to reactive oxygen species;GO:0046467//membrane lipid bio…	K08869//aarF domain-containing kinase;K13457//disease resistance protein RPM1	XP_004237437.1//PREDICTED: uncharacterized protein LOC101248189 [Solanum lycopersicum]
BGI_novel_G022990	1404	52.82	923.12	4.1514	4.95318e-200	Up	7.93465e-201	NA	NA	GO:0005509//calcium ion binding;GO:0005525//GTP binding	NA	K12483//EH domain-containing protein 1	XP_016477437.1//PREDICTED: EH domain-containing protein 1-like isoform X1 [Nicotiana tabacum]
BGI_novel_G001937	1804	2782.32	946.73	-1.53123	5.02679e-200	Down	8.05783e-201	NA	GO:0016021//integral component of membrane	GO:0005215//transporter activity	GO:0055085//transmembrane transport	K12818//ATP-dependent RNA helicase DHX8/PRP22 [EC:3.6.4.13]	XP_016538308.1//PREDICTED: protein ZINC INDUCED FACILITATOR-LIKE 1-like [Capsicum annuum]
101259880	1220	802.15	2466.11	1.64433	6.80159e-200	Up	1.09171e-200	LOC101259880	GO:0005774//vacuolar membrane;GO:0031965//nuclear membrane	GO:0003779//actin binding	NA	K20478//golgin subfamily B member 1	gi|460403980|ref|XP_004247463.1|//PREDICTED: uncharacterized protein LOC101259880 [Solanum lycopersicum]
101246639	663	46.85	905.44	4.29653	7.49596e-200	Up	1.20394e-200	LOC101246639	NA	NA	NA	NA	gi|460392242|ref|XP_004241726.1|//PREDICTED: thionin-like protein 2 [Solanum lycopersicum]
BGI_novel_G009991	2612	623.07	2150.37	1.81115	1.38336e-199	Up	2.22329e-200	NA	NA	NA	NA	K03029//26S proteasome regulatory subunit N10	XP_004237412.1//PREDICTED: uncharacterized protein LOC101265534 [Solanum lycopersicum]
101256517	2408	1375.9	3391.53	1.32559	1.56777e-199	Up	2.52132e-200	LOC101256517	NA	NA	NA	NA	gi|460367150|ref|XP_004229438.1|//PREDICTED: neurogenic protein mastermind-like [Solanum lycopersicum]
101261172	1504	1470.97	3534.81	1.2889	3.98782e-199	Up	6.41748e-200	LOC101261172	NA	NA	NA	K04733//interleukin-1 receptor-associated kinase 4 [EC:2.7.11.1]	gi|460370367|ref|XP_004231024.1|//PREDICTED: thaumatin-like protein 1 [Solanum lycopersicum]
101255404	8610	218.17	1342.25	2.64516	4.95839e-199	Up	7.98458e-200	LOC101255404	NA	NA	NA	K11643//chromodomain-helicase-DNA-binding protein 4 [EC:3.6.4.12]	gi|723704589|ref|XP_010321886.1|//PREDICTED: uncharacterized protein LOC101255404 isoform X1 [Solanum lycopersicum]
BGI_novel_G025355	2264	375	1676	2.18409	8.57295e-199	Up	1.38142e-199	NA	GO:0016021//integral component of membrane	GO:0005524//ATP binding;GO:0004672//protein kinase activity	NA	K04733//interleukin-1 receptor-associated kinase 4 [EC:2.7.11.1]	XP_015060033.1//PREDICTED: putative receptor-like protein kinase At4g00960 [Solanum pennellii]
101246176	2658	4604.74	2111.35	-1.10092	1.16432e-198	Down	1.87737e-199	LOC101246176	NA	NA	NA	K14153//hydroxymethylpyrimidine kinase / phosphomethylpyrimidine kinase / thiamine-phosphate diphosphorylase [EC:2.7.1.49 2.7.4.7 2.5.1.3];K03707//thiaminase (transcriptional activator TenA) [EC:3.5.99.2]	gi|723730267|ref|XP_010326344.1|//PREDICTED: uncharacterized protein LOC101246176 [Solanum lycopersicum]
101248075	1959	459.59	1841.18	2.02624	1.56449e-198	Up	2.52753e-199	LOC101248075	NA	NA	NA	K14826//FK506-binding nuclear protein [EC:5.2.1.8]	gi|460376760|ref|XP_004234165.1|//PREDICTED: peptidyl-prolyl cis-trans isomerase FKBP53 [Solanum lycopersicum]
101257261	1913	83.21	1003.05	3.61553	1.60812e-198	Up	2.5997e-199	LOC101257261	NA	NA	NA	K14638//solute carrier family 15 (peptide/histidine transporter), member 3/4	gi|460386504|ref|XP_004238938.1|//PREDICTED: protein NRT1/ PTR FAMILY 3.1 [Solanum lycopersicum]
101266647	697	136.79	1144.42	3.08861	2.07319e-198	Up	3.35588e-199	LOC101266647	NA	NA	NA	K09286//EREBP-like factor	gi|460393200|ref|XP_004242199.1|//PREDICTED: ethylene-responsive transcription factor ERF003-like [Solanum lycopersicum]
BGI_novel_G021247	2474	1660.79	349.11	-2.22608	2.35977e-198	Down	3.82472e-199	NA	NA	GO:0016874//ligase activity	NA	K02184//formin 2	XP_015089639.1//PREDICTED: uncharacterized protein LOC107032545 [Solanum pennellii]
BGI_novel_G016440	2342	2898.11	1021.76	-1.48002	3.77139e-198	Down	6.11663e-199	NA	GO:0016021//integral component of membrane	GO:0004674//protein serine/threonine kinase activity;GO:0005524//ATP binding	NA	K04733//interleukin-1 receptor-associated kinase 4 [EC:2.7.11.1]	XP_004243251.1//PREDICTED: G-type lectin S-receptor-like serine/threonine-protein kinase SD2-5 [Solanum lycopersicum]
BGI_novel_G017868	2589	2994	1079.94	-1.44709	6.03e-198	Down	9.79871e-199	NA	NA	GO:0005524//ATP binding;GO:0004672//protein kinase activity	NA	K00924//kinase [EC:2.7.1.-]	XP_004245388.2//PREDICTED: receptor-like protein kinase 2 [Solanum lycopersicum]
BGI_novel_G020515	765	4028.3	1734.11	-1.19194	2.10758e-197	Down	3.43365e-198	NA	NA	NA	GO:0006952//defense response;GO:0009607//response to biotic stimulus	K14496//abscisic acid receptor PYR/PYL family	NP_001275580.1//pathogenesis-related protein STH-2-like [Solanum lycopersicum]
BGI_novel_G010580	2797	40.82	878.27	4.45135	3.13673e-197	Up	5.11361e-198	NA	GO:0005874//microtubule;GO:0005871//kinesin complex	GO:0005524//ATP binding;GO:0003777//microtubule motor activity;GO:0008017//microtubule binding;GO:0016887//ATPase activity	GO:0007018//microtubule-based movement	K11498//centromeric protein E	XP_004238068.1//PREDICTED: kinesin-like protein KIN-7N [Solanum lycopersicum]
104645842	696	1783.15	411.34	-2.09199	4.83629e-197	Down	7.88937e-198	LOC104645842	NA	NA	NA	K04733//interleukin-1 receptor-associated kinase 4 [EC:2.7.11.1];K07195//exocyst complex component 7;K13415//protein brassinosteroid insensitive 1 [EC:2.7.10.1 2.7.11.1]	gi|723675040|ref|XP_010316804.1|//PREDICTED: uncharacterized protein LOC104645842 [Solanum lycopersicum]
BGI_novel_G019276	1292	1866.46	4109.94	1.16285	6.85885e-197	Up	1.11959e-197	NA	NA	GO:0016788//hydrolase activity, acting on ester bonds	NA	K21026//acetylajmaline esterase [EC:3.1.1.80];K16280//E3 ubiquitin-protein ligase RGLG [EC:2.3.2.27]	XP_004246526.1//PREDICTED: GDSL esterase/lipase At5g03610 [Solanum lycopersicum]
101252447	2647	1923.18	4190.84	1.14778	1.26814e-196	Up	2.07269e-197	LOC101252447	NA	NA	NA	K04733//interleukin-1 receptor-associated kinase 4 [EC:2.7.11.1];K13199//plasminogen activator inhibitor 1 RNA-binding protein;K12663//Delta(3,5)-Delta(2,4)-dienoyl-CoA isomerase [EC:5.3.3.-];K01183//chitinase [EC:3.2.1.14]	gi|460408139|ref|XP_004249504.1|//PREDICTED: subtilisin-like protease [Solanum lycopersicum]
BGI_novel_G025675	3524	1554.04	0	-11.5778	1.95369e-196	Down	3.19726e-197	NA	NA	NA	NA	K11984//U4/U6.U5 tri-snRNP-associated protein 1	XP_004252987.1//PREDICTED: myb-like protein X [Solanum lycopersicum]
101246261	1622	1551.52	0	-11.5754	3.3663e-196	Down	5.51962e-197	LOC101246261	NA	NA	NA	NA	gi|460394023|ref|XP_004242605.1|//PREDICTED: uncharacterized protein LOC101246261 [Solanum lycopersicum]
BGI_novel_G017726	4021	1458.86	3496.95	1.28529	3.6493e-196	Up	5.98748e-197	NA	GO:0016021//integral component of membrane;GO:0005739//mitochondrion	GO:0004674//protein serine/threonine kinase activity;GO:0005524//ATP binding;GO:0042277//peptide binding	GO:0001558//regulation of cell growth;GO:0050832//defense response to fungus;GO:1905421//regulation of plant organ morphogenesis;GO:0051302//regulation of cell division;GO:0010148//transpiration;GO:0042742//defense response to bacterium;GO:0009965//leaf morphogenesis;GO:0001944//vasculature development;GO:0010103//stomatal complex morphogenesis;GO:0009664//plant-type cell wall organization;GO:007…	K20718//LRR receptor-like serine/threonine-protein kinase ERECTA [EC:2.7.11.1]	XP_004245043.1//PREDICTED: LRR receptor-like serine/threonine-protein kinase ERECTA [Solanum lycopersicum]
101256933	1402	509.9	1924.92	1.94055	3.88116e-196	Up	6.37197e-197	LOC101256933	NA	NA	NA	NA	gi|460372175|ref|XP_004231907.1|//PREDICTED: uncharacterized protein LOC101256933 [Solanum lycopersicum]
101262358	2347	793.97	2431.24	1.63857	4.08359e-196	Up	6.70859e-197	LOC101262358	NA	NA	NA	K10398//kinesin family member 11;K01062//platelet-activating factor acetylhydrolase [EC:3.1.1.47]	gi|723663719|ref|XP_010314390.1|//PREDICTED: uncharacterized protein At5g08430 isoform X1 [Solanum lycopersicum]
BGI_novel_G010732	2560	658.52	2195.11	1.76103	5.02362e-196	Up	8.25815e-197	NA	NA	NA	NA	K20642//Rho GTPase-activating protein 22/24/25;K10756//replication factor C subunit 3/5	XP_004238182.1//PREDICTED: uncharacterized protein LOC101262306 isoform X1 [Solanum lycopersicum]
101262942	1904	963.47	2713.87	1.51807	6.45375e-196	Up	1.06294e-196	LOC101262942	NA	NA	NA	K00948//ribose-phosphate pyrophosphokinase [EC:2.7.6.1]	gi|460400709|ref|XP_004245875.1|//PREDICTED: ribose-phosphate pyrophosphokinase 1 [Solanum lycopersicum]
BGI_novel_G025354	2672	4379.93	1975.39	-1.12474	1.23862e-195	Down	2.04131e-196	NA	NA	GO:0046983//protein dimerization activity	NA	NA	XP_010314584.1//PREDICTED: transcription factor bHLH145-like isoform X1 [Solanum lycopersicum]
BGI_novel_G022459	4280	435.18	1778.38	2.05491	2.63741e-195	Up	4.34937e-196	NA	NA	NA	NA	K06627//cyclin-A	XP_004249849.1//PREDICTED: uncharacterized protein LOC101257324 [Solanum lycopersicum]
101251847	2421	724.31	2306.62	1.69513	2.84351e-195	Up	4.69223e-196	LOC101251847	NA	NA	NA	NA	gi|460375970|ref|XP_004233775.1|//PREDICTED: serine/arginine repetitive matrix protein 3-like [Solanum lycopersicum]
BGI_novel_G004433	1023	2590.45	5127.77	1.00916	3.77711e-195	Up	6.2447e-196	NA	GO:0005768//endosome	GO:0005525//GTP binding;GO:0003924//GTPase activity	NA	K07904//Ras-related protein Rab-11A	XP_004233065.1//PREDICTED: ras-related protein RABA1d [Solanum lycopersicum]
101255038	3299	3477.59	1390.48	-1.29847	6.24757e-195	Down	1.03422e-195	LOC101255038	NA	NA	NA	K00924//kinase [EC:2.7.1.-]	gi|460369630|ref|XP_004230660.1|//PREDICTED: receptor-like protein kinase HAIKU2 [Solanum lycopersicum]
BGI_novel_G025813	3418	3406	1346	-1.31537	8.92394e-195	Down	1.4782e-195	NA	GO:0016021//integral component of membrane	NA	NA	K19613//leucine-rich repeat protein SHOC2	XP_019066835.1//PREDICTED: receptor-like protein 12 [Solanum lycopersicum]
BGI_novel_G007283	1158	4039.95	1754	-1.17966	9.1397e-195	Down	1.5149e-195	NA	GO:0016021//integral component of membrane	GO:0030247//polysaccharide binding	NA	K04733//interleukin-1 receptor-associated kinase 4 [EC:2.7.11.1]	XP_004234949.1//PREDICTED: LEAF RUST 10 DISEASE-RESISTANCE LOCUS RECEPTOR-LIKE PROTEIN KINASE-like 2.1 [Solanum lycopersicum]
BGI_novel_G007621	1645	2280.78	4688.89	1.06375	1.45455e-194	Up	2.41244e-195	NA	NA	GO:0005509//calcium ion binding	NA	K02183//calmodulin	NP_001234786.1//calmodulin [Solanum lycopersicum]
101257792	1554	3982.88	1718.63	-1.18852	2.56592e-194	Down	4.26645e-195	LOC101257792	NA	NA	NA	NA	gi|460400673|ref|XP_004245857.1|//PREDICTED: probable purine permease 11 [Solanum lycopersicum]
BGI_novel_G009033	2019	59.87	919.91	3.96562	4.78567e-194	Up	7.96232e-195	NA	NA	NA	NA	NA	XP_004236975.1//PREDICTED: uncharacterized protein LOC101252276 [Solanum lycopersicum]
BGI_novel_G020443	2515	1279.07	188.25	-2.74034	9.52399e-194	Down	1.58658e-194	NA	GO:0016021//integral component of membrane;GO:0005737//cytoplasm	GO:0008757//S-adenosylmethionine-dependent methyltransferase activity;GO:0008168//methyltransferase activity	GO:0032259//methylation	K16302//metal transporter CNNM;K15449//tRNA wybutosine-synthesizing protein 1 [EC:4.1.3.44]	XP_019232824.1//PREDICTED: probable methyltransferase PMT3 [Nicotiana attenuata]
544278	4071	1521.69	0	-11.5474	2.16312e-193	Down	3.61031e-194	rpb2	GO:0005665//DNA-directed RNA polymerase II, core complex;GO:0009506//plasmodesma;GO:0005829//cytosol	GO:0032549//ribonucleoside binding;GO:0003677//DNA binding;GO:0046872//metal ion binding;GO:0001055//RNA polymerase II activity	GO:0006366//transcription from RNA polymerase II promoter	K03010//DNA-directed RNA polymerase II subunit RPB2 [EC:2.7.7.6]	gi|350534526|ref|NP_001233889.1|//DNA-directed RNA polymerase II subunit RPB2 [Solanum lycopersicum]
101243909	1230	1343.13	216	-2.61246	2.73286e-193	Down	4.56695e-194	LOC101243909	NA	NA	NA	K04733//interleukin-1 receptor-associated kinase 4 [EC:2.7.11.1]	gi|723718854|ref|XP_004244276.2|//PREDICTED: epidermis-specific secreted glycoprotein EP1-like [Solanum lycopersicum]
101259032	884	525	1938	1.90821	3.99407e-193	Up	6.68715e-194	LOC101259032	NA	NA	NA	K13944//LOB domain-containing protein 16	gi|460378965|ref|XP_004235237.1|//PREDICTED: LOB domain-containing protein 21 [Solanum lycopersicum]
BGI_novel_G009647	2283	1642.65	3752.69	1.21593	5.1072e-193	Up	8.55617e-194	NA	GO:0016021//integral component of membrane	GO:0003975//UDP-N-acetylglucosamine-dolichyl-phosphate N-acetylglucosaminephosphotransferase activity;GO:0008963//phospho-N-acetylmuramoyl-pentapeptide-transferase activity	GO:0006487//protein N-linked glycosylation;GO:0006488//dolichol-linked oligosaccharide biosynthetic process	K01001//UDP-N-acetylglucosamine--dolichyl-phosphate N-acetylglucosaminephosphotransferase [EC:2.7.8.15]	XP_019187102.1//PREDICTED: UDP-N-acetylglucosamine--dolichyl-phosphate N-acetylglucosaminephosphotransferase-like [Ipomoea nil]
544008	2824	3647.94	1509.59	-1.24889	1.83199e-192	Down	3.07492e-193	TomloxC	GO:0009534//chloroplast thylakoid;GO:0009570//chloroplast stroma	GO:0046872//metal ion binding;GO:0016165//linoleate 13S-lipoxygenase activity	GO:0006633//fatty acid biosynthetic process;GO:0055114//oxidation-reduction process;GO:0031408//oxylipin biosynthetic process	K00454//lipoxygenase [EC:1.13.11.12]	gi|795881064|ref|NP_001233812.2|//lipoxygenase [Solanum lycopersicum]
101262863	1653	363.96	1623.81	2.18156	2.19158e-192	Up	3.68078e-193	LOC101262863	NA	NA	NA	K03006//DNA-directed RNA polymerase II subunit RPB1 [EC:2.7.7.6]	gi|460369003|ref|XP_004230354.1|//PREDICTED: glucan endo-1,3-beta-glucosidase 4 [Solanum lycopersicum]
101257409	1612	1463.26	3477.71	1.27298	3.19326e-192	Up	5.36646e-193	LOC101257409	GO:0016021//integral component of membrane	GO:0015171//amino acid transmembrane transporter activity	GO:0003333//amino acid transmembrane transport	K15015//solute carrier family 32 (vesicular inhibitory amino acid transporter)	gi|460405045|ref|XP_004247988.1|//PREDICTED: vacuolar amino acid transporter 1 [Solanum lycopersicum]
101244516	1746	489.25	1866.25	1.95553	3.81931e-192	Up	6.42257e-193	LOC101244516	NA	NA	NA	K16812//targeting protein for Xklp2	gi|723724674|ref|XP_010325443.1|//PREDICTED: protein TPX2 isoform X1 [Solanum lycopersicum]
BGI_novel_G020572	4582	1711	388	-2.11668	5.89542e-192	Down	9.91996e-193	NA	GO:0016021//integral component of membrane	GO:0005524//ATP binding;GO:0016887//ATPase activity	GO:0006810//transport	K05681//ATP-binding cassette, subfamily G (WHITE), member 2	XP_016566100.1//PREDICTED: pleiotropic drug resistance protein 1 [Capsicum annuum]
BGI_novel_G010785	1256	940.94	2653.03	1.5195	7.93922e-192	Up	1.33673e-192	NA	GO:0016021//integral component of membrane	GO:0015292//uniporter activity	NA	K20858//calcium uniporter protein, mitochondrial	XP_004238222.1//PREDICTED: calcium uniporter protein 4, mitochondrial [Solanum lycopersicum]
BGI_novel_G002475	2714	242.87	1366.48	2.51624	8.4498e-192	Up	1.42447e-192	NA	GO:0089701//U2AF;GO:0005681//spliceosomal complex	GO:0003723//RNA binding;GO:0046872//metal ion binding;GO:0030628//pre-mRNA 3'-splice site binding	GO:0000398//mRNA splicing, via spliceosome	K08819//cyclin-dependent kinase 12/13 [EC:2.7.11.22 2.7.11.23];K12836//splicing factor U2AF 35 kDa subunit	XP_010314310.1//PREDICTED: zinc finger CCCH domain-containing protein 5 [Solanum lycopersicum]
BGI_novel_G004436	3926	840.89	29.21	-4.82335	9.93368e-192	Down	1.6767e-192	NA	NA	GO:0004805//trehalose-phosphatase activity;GO:0003825//alpha,alpha-trehalose-phosphate synthase (UDP-forming) activity;GO:0003824//catalytic activity	GO:0005992//trehalose biosynthetic process	K16055//trehalose 6-phosphate synthase/phosphatase [EC:2.4.1.15 3.1.3.12]	XP_019166744.1//PREDICTED: probable alpha,alpha-trehalose-phosphate synthase [UDP-forming] 7 [Ipomoea nil]
101257069	2175	4909.47	2355.77	-1.03534	1.07342e-191	Down	1.81294e-192	LOC101257069	NA	NA	NA	K17500//integrin-linked kinase-associated serine/threonine phosphatase 2C [EC:3.1.3.16];K19704//protein phosphatase PTC1 [EC:3.1.3.16];K17506//protein phosphatase 1L [EC:3.1.3.16]	gi|460384941|ref|XP_004238165.1|//PREDICTED: probable protein phosphatase 2C 12 [Solanum lycopersicum]
101261378	1893	1234.33	3120.9	1.36227	1.55655e-191	Up	2.63382e-192	LOC101261378	NA	NA	NA	K16675//palmitoyltransferase ZDHHC9/14/18 [EC:2.3.1.225]	gi|460371865|ref|XP_004231755.1|//PREDICTED: probable protein S-acyltransferase 7 [Solanum lycopersicum]
101266483	2520	204.12	1277.71	2.6701	1.8435e-191	Up	3.12324e-192	LOC101266483	NA	NA	NA	NA	gi|460411358|ref|XP_004251079.1|//PREDICTED: uncharacterized protein At5g41620 isoform X1 [Solanum lycopersicum]
101260816	1849	3502.62	1421.56	-1.27693	2.48968e-191	Down	4.2232e-192	LOC101260816	NA	NA	NA	K15639//PHYB activation tagged suppressor 1 [EC:1.14.-.-]	gi|460386682|ref|XP_004239025.1|//PREDICTED: cytochrome P450 CYP749A22-like [Solanum lycopersicum]
101262096	4232	149	1146	2.96726	2.54072e-191	Up	4.31245e-192	LOC101262096	NA	NA	NA	K10400//kinesin family member 15	gi|723753133|ref|XP_010314743.1|//PREDICTED: kinesin-like protein KIN12B [Solanum lycopersicum]
BGI_novel_G003647	508	2139.73	4461.06	1.08399	6.52094e-191	Up	1.10819e-191	NA	GO:0005634//nucleus;GO:0005667//transcription factor complex	GO:0003677//DNA binding;GO:0003713//transcription coactivator activity	GO:0060261//positive regulation of transcription initiation from RNA polymerase II promoter;GO:0006355//regulation of transcription, DNA-templated	NA	XP_004233574.1//PREDICTED: RNA polymerase II transcriptional coactivator KIWI-like [Solanum lycopersicum]
BGI_novel_G020288	952	2415.41	4848.71	1.02937	1.07769e-190	Up	1.83259e-191	NA	GO:0005839//proteasome core complex	GO:0004298//threonine-type endopeptidase activity	GO:0051603//proteolysis involved in cellular protein catabolic process	K02734//20S proteasome subunit beta 4 [EC:3.4.25.1]	NP_001308113.1//proteasome subunit beta type-2-B [Solanum lycopersicum]
BGI_novel_G008603	2021	491.04	1861.2	1.94635	1.87858e-190	Up	3.20432e-191	NA	GO:0005634//nucleus	GO:0032041//NAD-dependent histone deacetylase activity (H3-K14 specific)	GO:0006355//regulation of transcription, DNA-templated;GO:0006351//transcription, DNA-templated;GO:0009294//DNA mediated transformation	K11407//histone deacetylase 6 [EC:3.5.1.98]	XP_010318595.1//PREDICTED: histone deacetylase 15 isoform X2 [Solanum lycopersicum]
BGI_novel_G010452	5471	1488.86	0	-11.516	2.77105e-190	Down	4.73244e-191	NA	GO:0005634//nucleus	GO:0042393//histone binding;GO:0005524//ATP binding;GO:0003682//chromatin binding;GO:0016887//ATPase activity	GO:0045944//positive regulation of transcription from RNA polymerase II promoter;GO:0031936//negative regulation of chromatin silencing	K13525//transitional endoplasmic reticulum ATPase	XP_004237983.1//PREDICTED: ATPase family AAA domain-containing protein At1g05910 [Solanum lycopersicum]
BGI_novel_G024281	2327	2422.99	771.68	-1.62668	2.79485e-190	Down	4.77602e-191	NA	NA	GO:0016491//oxidoreductase activity	NA	K17839//polyamine oxidase [EC:1.5.3.17 1.5.3.-]	XP_015061716.1//PREDICTED: probable polyamine oxidase 2 [Solanum pennellii]
BGI_novel_G011154	1147	1943.27	509.96	-1.906	3.48518e-190	Down	5.95936e-191	NA	GO:0048046//apoplast;GO:0005618//cell wall	NA	GO:0071555//cell wall organization	K06699//proteasome activator subunit 4;K12472//epidermal growth factor receptor substrate 15	NP_001297245.1//polygalacturonase non-catalytic subunit AroGP2 precursor [Solanum lycopersicum]
BGI_novel_G021400	3529	1538.39	310.01	-2.287	5.89678e-190	Down	1.00892e-190	NA	GO:0016021//integral component of membrane;GO:0005737//cytoplasm	NA	NA	K22138//mitochondrial pyruvate carrier 1	XP_010327510.1//PREDICTED: uncharacterized protein At1g04910 isoform X2 [Solanum lycopersicum]
BGI_novel_G002448	3396	903.52	2578.14	1.53674	1.49256e-189	Up	2.55841e-190	NA	NA	GO:0050518//2-C-methyl-D-erythritol 4-phosphate cytidylyltransferase activity	GO:0008299//isoprenoid biosynthetic process	K00991//2-C-methyl-D-erythritol 4-phosphate cytidylyltransferase [EC:2.7.7.60]	XP_010314187.1//PREDICTED: 2-C-methyl-D-erythritol 4-phosphate cytidylyltransferase, chloroplastic isoform X1 [Solanum lycopersicum]
101255124	2482	1205.44	165.59	-2.83984	1.72557e-189	Down	2.95962e-190	LOC101255124	NA	NA	NA	K08332//vacuolar protein 8	gi|460401517|ref|XP_004246269.1|//PREDICTED: U-box domain-containing protein 16 [Solanum lycopersicum]
BGI_novel_G009948	2916	1478.3	0	-11.5057	2.80083e-189	Down	4.80973e-190	NA	GO:0016021//integral component of membrane	GO:0016301//kinase activity	NA	K08869//aarF domain-containing kinase;K13457//disease resistance protein RPM1	XP_009769152.1//PREDICTED: uncharacterized aarF domain-containing protein kinase At1g79600, chloroplastic [Nicotiana sylvestris]
101255362	1470	1106.25	2903.16	1.41598	5.67811e-189	Up	9.7567e-190	LOC101255362	NA	NA	NA	K14491//two-component response regulator ARR-B family	gi|460375694|ref|XP_004233639.1|//PREDICTED: putative two-component response regulator ARR13 [Solanum lycopersicum]
101247062	2595	1110.48	129.43	-3.07691	9.12483e-189	Down	1.57079e-189	LOC101247062	NA	NA	NA	K03386//peroxiredoxin (alkyl hydroperoxide reductase subunit C) [EC:1.11.1.15];K19525//vacuolar protein sorting-associated protein 13A/C;K13217//pre-mRNA-processing factor 39	gi|723730272|ref|XP_010326346.1|//PREDICTED: uncharacterized protein LOC101247062 [Solanum lycopersicum]
101246993	2618	548.82	1958	1.85901	2.04519e-188	Up	3.52925e-189	LOC101246993	NA	NA	NA	K16732//protein regulator of cytokinesis 1	gi|460376752|ref|XP_004234161.1|//PREDICTED: 65-kDa microtubule-associated protein 3 [Solanum lycopersicum]
101255743	2990	453.84	1780.34	1.99593	2.47044e-188	Up	4.26568e-189	LOC101255743	NA	NA	NA	NA	gi|460371248|ref|XP_004231454.1|//PREDICTED: uncharacterized protein LOC101255743 [Solanum lycopersicum]
BGI_novel_G022328	1121	2872.52	1042.76	-1.43788	3.40213e-188	Down	5.88155e-189	NA	NA	NA	NA	K12382//saposin;K15285//solute carrier family 35, member E3	XP_004249679.1//PREDICTED: protein LURP-one-related 10 [Solanum lycopersicum]
101255013	2408	137.73	1104.3	3.02725	5.67004e-188	Up	9.80822e-189	LOC101255013	NA	NA	NA	K02516//type II protein arginine methyltransferase [EC:2.1.1.320]	gi|460397799|ref|XP_004244454.1|//PREDICTED: protein arginine N-methyltransferase 1.5 [Solanum lycopersicum]
BGI_novel_G006917	891	724.57	2267.03	1.66964	6.49346e-188	Up	1.12394e-188	NA	GO:0005634//nucleus;GO:0000786//nucleosome	GO:0003677//DNA binding;GO:0046982//protein heterodimerization activity	NA	K11252//histone H2B	XP_004234912.1//PREDICTED: histone H2B [Solanum lycopersicum]
BGI_novel_G002196	784	489.09	1843.73	1.93849	1.11241e-187	Up	1.92778e-188	NA	GO:0005634//nucleus;GO:0000790//nuclear chromatin;GO:0000786//nucleosome	GO:0003677//DNA binding;GO:0046982//protein heterodimerization activity	GO:0006342//chromatin silencing	K11251//histone H2A	NP_001296309.1//histone H2A.1 [Solanum lycopersicum]
543929	404	2769.61	982.97	-1.47043	1.22528e-187	Down	2.12596e-188	LOC543929	NA	NA	GO:0006633//fatty acid biosynthetic process	K03955//NADH dehydrogenase (ubiquinone) 1 alpha/beta subcomplex 1	gi|350536815|ref|NP_001234522.1|//acyl carrier protein [Solanum lycopersicum]
101263886	2051	2311.6	717.63	-1.66355	1.80279e-187	Down	3.13365e-188	LOC101263886	NA	NA	NA	K08790//serine/threonine kinase 38 [EC:2.7.11.1]	gi|460414831|ref|XP_004252766.1|//PREDICTED: serine/threonine-protein kinase 38-like [Solanum lycopersicum]
BGI_novel_G005095	1223	376	1623	2.13389	4.28629e-187	Up	7.464e-188	NA	NA	GO:0003677//DNA binding;GO:0003700//DNA binding transcription factor activity	NA	K14432//ABA responsive element binding factor	NP_001234345.1//self-pruning G-box protein [Solanum lycopersicum]
BGI_novel_G019695	2170	209.28	1268.87	2.62407	1.23198e-186	Up	2.1492e-187	NA	NA	NA	NA	K03063//26S proteasome regulatory subunit T3	XP_004247004.1//PREDICTED: BTB/POZ domain-containing protein At3g08570 [Solanum lycopersicum]
BGI_novel_G008228	657	1922.29	4114.52	1.12193	3.33113e-186	Up	5.82166e-187	NA	NA	NA	NA	K03860//phosphatidylinositol glycan, class Q	XP_004236040.1//PREDICTED: gibberellin-regulated protein 6 [Solanum lycopersicum]
BGI_novel_G016799	2796	744.93	2290.21	1.64434	9.10374e-186	Up	1.59484e-186	NA	NA	GO:0003824//catalytic activity	NA	K17508//protein phosphatase PTC7 [EC:3.1.3.16]	XP_004244138.1//PREDICTED: probable protein phosphatase 2C 55 [Solanum lycopersicum]
BGI_novel_G020341	2099	1061.24	2811.86	1.42981	9.25056e-186	Up	1.62153e-186	NA	NA	NA	NA	NA	XP_004247620.1//PREDICTED: uncharacterized protein LOC101261455 [Solanum lycopersicum]
101261596	2460	1438.79	0	-11.4666	1.67767e-185	Down	2.94253e-186	LOC101261596	NA	NA	NA	K13126//polyadenylate-binding protein	gi|460414815|ref|XP_004252758.1|//PREDICTED: polyadenylate-binding protein 2-like [Solanum lycopersicum]
101265735	2711	4992.28	2448.25	-1.00391	2.40843e-185	Down	4.23183e-186	LOC101265735	NA	NA	NA	K00615//transketolase [EC:2.2.1.1]	gi|460388792|ref|XP_004240048.1|//PREDICTED: transketolase, chloroplastic-like [Solanum lycopersicum]
BGI_novel_G016415	1031	1873.02	4034.61	1.1311	5.25316e-185	Up	9.25231e-186	NA	GO:0005840//ribosome;GO:0022625//cytosolic large ribosomal subunit	GO:0003723//RNA binding;GO:0003735//structural constituent of ribosome	GO:0006412//translation;GO:0000027//ribosomal large subunit assembly	K02868//large subunit ribosomal protein L11e	NP_001274979.1//60S ribosomal protein L11-2-like [Solanum tuberosum]
BGI_novel_G022065	1974	1429.15	0	-11.4569	1.41612e-184	Down	2.49567e-185	NA	GO:0016021//integral component of membrane;GO:0009507//chloroplast	GO:0008237//metallopeptidase activity;GO:0004222//metalloendopeptidase activity	GO:0009959//negative gravitropism;GO:0009416//response to light stimulus;GO:0060359//response to ammonium ion;GO:0009723//response to ethylene;GO:0043157//response to cation stress;GO:0009658//chloroplast organization;GO:0048564//photosystem I assembly;GO:0010207//photosystem II assembly;GO:0010027//thylakoid membrane organization	NA	NP_001299816.1//lutescent 2 [Solanum lycopersicum]
BGI_novel_G002850	3319	1698.41	399.52	-2.06381	1.45097e-184	Down	2.55861e-185	NA	GO:0016021//integral component of membrane	GO:0004674//protein serine/threonine kinase activity;GO:0005524//ATP binding	NA	K00924//kinase [EC:2.7.1.-]	XP_004230660.1//PREDICTED: receptor-like protein kinase HAIKU2 [Solanum lycopersicum]
101257969	1846	2742.6	978.48	-1.4629	2.0237e-184	Down	3.57279e-185	LOC101257969	NA	NA	NA	NA	gi|460389468|ref|XP_004240374.1|//PREDICTED: protein TIC 62, chloroplastic [Solanum lycopersicum]
BGI_novel_G014791	2632	3093.07	1192.44	-1.35109	2.02698e-184	Down	3.58072e-185	NA	GO:0005634//nucleus;GO:0005737//cytoplasm	GO:0004842//ubiquitin-protein transferase activity	NA	K08332//vacuolar protein 8	XP_004241233.1//PREDICTED: U-box domain-containing protein 13 isoform X1 [Solanum lycopersicum]
BGI_novel_G004349	962	3351.79	1355.57	-1.282	2.7265e-184	Down	4.8193e-185	NA	GO:0005622//intracellular	NA	GO:0000160//phosphorelay signal transduction system	K14492//two-component response regulator ARR-A family	XP_004233018.1//PREDICTED: two-component response regulator ORR3-like [Solanum lycopersicum]
101262410	2050	1566.48	3578.2	1.21574	4.41383e-184	Up	7.80641e-185	LOC101262410	NA	NA	NA	K16297//serine carboxypeptidase-like clade II [EC:3.4.16.-]	gi|460384063|ref|XP_004237734.1|//PREDICTED: serine carboxypeptidase-like 42 [Solanum lycopersicum]
BGI_novel_G010124	1934	2489.75	830.62	-1.55971	4.921e-184	Down	8.71886e-185	NA	GO:0005634//nucleus;GO:0005737//cytoplasm	GO:0003723//RNA binding	GO:0042256//mature ribosome assembly;GO:0006364//rRNA processing	K14574//ribosome maturation protein SDO1	XP_004237721.1//PREDICTED: ribosome maturation protein SBDS [Solanum lycopersicum]
101265985	1349	1228.74	3063.82	1.34218	7.08833e-184	Up	1.25663e-184	LOC101265985	NA	NA	NA	K08241//jasmonate O-methyltransferase [EC:2.1.1.141]	gi|460373240|ref|XP_004232429.1|//PREDICTED: salicylate carboxymethyltransferase isoform X1 [Solanum lycopersicum]
101262474	2655	572.4	1977.31	1.81248	7.48528e-184	Up	1.32779e-184	LOC101262474	NA	NA	NA	K16569//gamma-tubulin complex component 2	gi|723673634|ref|XP_010316548.1|//PREDICTED: gamma-tubulin complex component 2 [Solanum lycopersicum]
BGI_novel_G017667	2292	812.18	2393.16	1.58308	8.3443e-184	Up	1.48279e-184	NA	GO:0005634//nucleus	GO:0003677//DNA binding	GO:0006355//regulation of transcription, DNA-templated;GO:0006351//transcription, DNA-templated	NA	XP_004244892.1//PREDICTED: uncharacterized protein LOC101264140 [Solanum lycopersicum]
BGI_novel_G022999	1267	252.81	1352.58	2.44362	1.08573e-183	Up	1.93048e-184	NA	NA	NA	NA	NA	XP_004250255.1//PREDICTED: uncharacterized protein LOC101253249 [Solanum lycopersicum]
101256919	2764	1259.56	198.48	-2.64182	1.41149e-183	Down	2.5112e-184	LOC101256919	NA	NA	NA	K14514//ethylene-insensitive protein 3	gi|460404554|ref|XP_004247746.1|//PREDICTED: phosphate transporter PHO1 [Solanum lycopersicum]
101258236	2113	608.79	2039.43	1.76818	2.85426e-183	Up	5.08402e-184	LOC101258236	NA	NA	NA	NA	gi|460413735|ref|XP_004252236.1|//PREDICTED: uncharacterized protein LOC101258236 [Solanum lycopersicum]
BGI_novel_G017754	2740	1590.47	349.95	-2.1602	3.77297e-183	Down	6.72438e-184	NA	NA	GO:0016758//transferase activity, transferring hexosyl groups	GO:0008152//metabolic process	K13691//pathogen-inducible salicylic acid glucosyltransferase [EC:2.4.1.-]	XP_006351615.1//PREDICTED: UDP-glycosyltransferase 74F2-like [Solanum tuberosum]
101262628	2319	788.37	8.81	-6.45955	6.085e-183	Down	1.08578e-183	LOC101262628	NA	NA	NA	K08960//casein kinase 1, epsilon [EC:2.7.11.1]	gi|460393538|ref|XP_004242366.1|//PREDICTED: casein kinase I [Solanum lycopersicum]
BGI_novel_G001258	4451	2786.97	1010.94	-1.43897	7.53226e-183	Down	1.3456e-183	NA	NA	GO:0003723//RNA binding	GO:0006396//RNA processing	K13096//splicing factor 4	XP_004229607.1//PREDICTED: SURP and G-patch domain-containing protein 1-like protein [Solanum lycopersicum]
101250617	2711	1574.04	343.31	-2.17286	1.36651e-182	Down	2.44405e-183	LOC101250617	NA	NA	NA	K00549//5-methyltetrahydropteroyltriglutamate--homocysteine methyltransferase [EC:2.1.1.14]	gi|460365154|ref|XP_004228469.1|//PREDICTED: 5-methyltetrahydropteroyltriglutamate--homocysteine methyltransferase [Solanum lycopersicum]
BGI_novel_G004828	2058	1257.33	199.76	-2.62999	2.26105e-182	Down	4.05109e-183	NA	GO:0016021//integral component of membrane	NA	NA	NA	XP_009789015.1//PREDICTED: uncharacterized GPI-anchored protein At1g61900-like isoform X1 [Nicotiana sylvestris]
BGI_novel_G025851	2139	250.98	1342.63	2.44345	2.44537e-182	Up	4.3839e-183	NA	NA	NA	NA	K15501//serine/threonine-protein phosphatase 6 regulatory subunit 3	XP_010314884.1//PREDICTED: serine/threonine-protein phosphatase 6 regulatory subunit 3-like isoform X2 [Solanum lycopersicum]
BGI_novel_G020088	2852	23.79	775.32	5.0504	3.01037e-182	Up	5.39995e-183	NA	NA	GO:0003677//DNA binding;GO:0046983//protein dimerization activity	NA	K04733//interleukin-1 receptor-associated kinase 4 [EC:2.7.11.1];K20890//xylan alpha-glucuronosyltransferase [EC:2.4.1.-];K11866//STAM-binding protein [EC:3.4.19.12];K10398//kinesin family member 11;K20799//BRISC complex subunit Abro1	XP_015081314.1//PREDICTED: zinc finger BED domain-containing protein RICESLEEPER 2-like [Solanum pennellii]
101249135	1524	1446.6	3385.75	1.25084	3.55943e-182	Up	6.3923e-183	LOC101249135	NA	NA	NA	K17895//GATA-binding protein 3	gi|723672465|ref|XP_004232457.2|//PREDICTED: GATA transcription factor 5-like [Solanum lycopersicum]
BGI_novel_G006363	1289	3980.8	1777.81	-1.13892	1.47395e-181	Down	2.65631e-182	NA	GO:0016021//integral component of membrane	NA	NA	NA	XP_004234132.1//PREDICTED: uncharacterized protein LOC101263673 [Solanum lycopersicum]
BGI_novel_G024916	2614	1397.83	0	-11.4249	1.48037e-181	Down	2.66944e-182	NA	GO:0016021//integral component of membrane	GO:0005524//ATP binding;GO:0042626//ATPase activity, coupled to transmembrane movement of substances	NA	K05656//ATP-binding cassette, subfamily B (MDR/TAP), member 9	XP_016570072.1//PREDICTED: ABC transporter B family member 26, chloroplastic isoform X1 [Capsicum annuum]
101256654	1794	4853.68	2374.25	-1.00757	2.51499e-181	Down	4.54563e-182	LOC101256654	NA	NA	NA	K00161//pyruvate dehydrogenase E1 component alpha subunit [EC:1.2.4.1]	gi|460412657|ref|XP_004251714.1|//PREDICTED: pyruvate dehydrogenase E1 component subunit alpha-3, chloroplastic-like [Solanum lycopersicum]
101267176	2367	2143.72	643.43	-1.71223	3.68562e-181	Down	6.66531e-182	LOC101267176	NA	NA	NA	K14794//ribosomal RNA-processing protein 12	gi|460371906|ref|XP_004231775.1|//PREDICTED: probable transporter mch1 [Solanum lycopersicum]
BGI_novel_G000704	1364	2353.27	762.36	-1.60209	6.95731e-181	Down	1.25966e-181	NA	NA	GO:0046872//metal ion binding;GO:0016707//gibberellin 3-beta-dioxygenase activity;GO:0016491//oxidoreductase activity	GO:0009416//response to light stimulus;GO:0009686//gibberellin biosynthetic process;GO:0009740//gibberellic acid mediated signaling pathway	K04124//gibberellin 3-beta-dioxygenase [EC:1.14.11.15]	XP_004229097.1//PREDICTED: gibberellin 3-beta-dioxygenase 1-like [Solanum lycopersicum]
BGI_novel_G024325	4307	2871.48	1070.56	-1.3994	1.17196e-180	Down	2.12313e-181	NA	GO:0016021//integral component of membrane;GO:0005886//plasma membrane	GO:0030246//carbohydrate binding;GO:0004674//protein serine/threonine kinase activity;GO:0005524//ATP binding	GO:0006468//protein phosphorylation	K04733//interleukin-1 receptor-associated kinase 4 [EC:2.7.11.1];K21867//potassium channel	XP_010314054.2//PREDICTED: G-type lectin S-receptor-like serine/threonine-protein kinase CES101 [Solanum lycopersicum]
BGI_novel_G008768	2114	2037.94	588.21	-1.76868	3.273e-180	Down	5.93969e-181	NA	NA	GO:0003723//RNA binding;GO:0008173//RNA methyltransferase activity	GO:0006396//RNA processing	K15332//tRNA (uracil-5-)-methyltransferase [EC:2.1.1.-]	XP_009630469.1//PREDICTED: uncharacterized protein LOC104120418 [Nicotiana tomentosiformis]
101258345	1058	1774.23	449.56	-1.95657	6.76741e-180	Down	1.22883e-180	LOC101258345	GO:0048046//apoplast;GO:0005618//cell wall	GO:0004553//hydrolase activity, hydrolyzing O-glycosyl compounds;GO:0016762//xyloglucan:xyloglucosyl transferase activity	GO:0010411//xyloglucan metabolic process;GO:0042546//cell wall biogenesis;GO:0071555//cell wall organization	K08235//xyloglucan:xyloglucosyl transferase [EC:2.4.1.207]	gi|460378800|ref|XP_004235156.1|//PREDICTED: probable xyloglucan endotransglucosylase/hydrolase protein 23 [Solanum lycopersicum]
BGI_novel_G005101	1607	993.08	2666.99	1.44926	7.37753e-180	Up	1.34039e-180	NA	GO:0016020//membrane;GO:0005622//intracellular	GO:0005525//GTP binding;GO:0003924//GTPase activity	GO:0007264//small GTPase mediated signal transduction	K04392//Ras-related C3 botulinum toxin substrate 1	NP_001315263.1//ROP GTPases family protein [Solanum lycopersicum]
BGI_novel_G002823	666	230.44	1286.72	2.50527	7.8886e-180	Up	1.43407e-180	NA	NA	GO:0003887//DNA-directed DNA polymerase activity;GO:0003677//DNA binding	GO:0006351//transcription, DNA-templated	K02331//DNA polymerase phi [EC:2.7.7.7]	XP_019067401.1//PREDICTED: DNA polymerase V-like isoform X1 [Solanum lycopersicum]
BGI_novel_G018532	787	2216.16	688.76	-1.66196	1.46329e-179	Down	2.66165e-180	NA	GO:0005747//mitochondrial respiratory chain complex I;GO:0016021//integral component of membrane	NA	NA	NA	XP_004245753.1//PREDICTED: NADH dehydrogenase [ubiquinone] 1 beta subcomplex subunit 8, mitochondrial [Solanum lycopersicum]
BGI_novel_G017889	2840	256.16	1341.08	2.41231	1.80889e-179	Up	3.29406e-180	NA	GO:0031080//nuclear pore outer ring	GO:0017056//structural constituent of nuclear pore	GO:0006406//mRNA export from nucleus;GO:0006606//protein import into nucleus;GO:0045893//positive regulation of transcription, DNA-templated	K14304//nuclear pore complex protein Nup85	XP_009772740.1//PREDICTED: nuclear pore complex protein Nup85 [Nicotiana sylvestris]
BGI_novel_G007571	2162	1150	160.57	-2.81633	2.40522e-179	Down	4.38505e-180	NA	NA	NA	NA	K17046//protein DEK	XP_015070872.1//PREDICTED: protein DEK-like isoform X4 [Solanum pennellii]
BGI_novel_G001839	2185	16	750.66	5.57605	2.67513e-179	Up	4.87994e-180	NA	NA	NA	NA	K01897//long-chain acyl-CoA synthetase [EC:6.2.1.3]	XP_019188238.1//PREDICTED: long chain acyl-CoA synthetase 4-like [Ipomoea nil]
BGI_novel_G020523	1500	115.98	1013.76	3.1518	3.10135e-179	Up	5.66069e-180	NA	NA	NA	NA	K10352//myosin heavy chain;K10406//kinesin family member C2/C3	XP_004247939.1//PREDICTED: forkhead-associated domain-containing protein 1-like [Solanum lycopersicum]
BGI_novel_G008466	2781	1066.49	2779.99	1.40624	3.57869e-179	Up	6.5357e-180	NA	GO:0016021//integral component of membrane	GO:0005524//ATP binding;GO:0004672//protein kinase activity	NA	K04733//interleukin-1 receptor-associated kinase 4 [EC:2.7.11.1]	XP_004235768.1//PREDICTED: probable inactive receptor kinase At1g48480 [Solanum lycopersicum]
BGI_novel_G011156	2198	2495.05	851.44	-1.52706	7.54421e-179	Down	1.37937e-179	NA	NA	NA	NA	K06699//proteasome activator subunit 4;K12472//epidermal growth factor receptor substrate 15	XP_004238669.1//PREDICTED: polygalacturonase-1 non-catalytic subunit beta-like [Solanum lycopersicum]
BGI_novel_G018146	2084	563.78	1935.59	1.8036	8.17856e-179	Up	1.49621e-179	NA	GO:0009543//chloroplast thylakoid lumen	GO:0046872//metal ion binding;GO:0004097//catechol oxidase activity	GO:0046148//pigment biosynthetic process	K00422//polyphenol oxidase [EC:1.10.3.1]	NP_001296326.1//polyphenol oxidase B, chloroplastic [Solanum lycopersicum]
BGI_novel_G011229	2105	71.16	891.87	3.67173	1.01962e-178	Up	1.86746e-179	NA	NA	NA	NA	K09517//DnaJ homolog subfamily B member 11;K03686//molecular chaperone DnaJ	XP_009789686.1//PREDICTED: chaperone protein dnaJ 16 [Nicotiana sylvestris]
BGI_novel_G015813	8776	3933.36	1761.34	-1.13506	1.90256e-178	Down	3.48858e-179	NA	GO:0016021//integral component of membrane	NA	NA	K06685//MOB kinase activator 1	XP_017223470.1//PREDICTED: uncharacterized protein At1g04910-like [Daucus carota subsp. sativus]
101245756	2515	757.67	13.57	-5.77904	3.34363e-178	Down	6.14497e-179	LOC101245756	NA	NA	NA	K13162	gi|460384701|ref|XP_004238048.1|//PREDICTED: KH domain-containing protein At4g18375 [Solanum lycopersicum]
BGI_novel_G003877	1898	1621.21	3618.34	1.18229	3.71447e-178	Up	6.8304e-179	NA	NA	NA	NA	K03257//translation initiation factor 4A;K13207//CUG-BP- and ETR3-like factor;K00161//pyruvate dehydrogenase E1 component alpha subunit [EC:1.2.4.1]	XP_004233402.1//PREDICTED: protein FLX-like 2 [Solanum lycopersicum]
BGI_novel_G002669	3042	1328.11	3179.56	1.28349	3.85771e-178	Up	7.09785e-179	NA	GO:0000778//condensed nuclear chromosome kinetochore;GO:0031262//Ndc80 complex	GO:0005200//structural constituent of cytoskeleton	GO:0051315//attachment of mitotic spindle microtubules to kinetochore	K11547//kinetochore protein NDC80	XP_004230560.1//PREDICTED: kinetochore protein NDC80 homolog [Solanum lycopersicum]
BGI_novel_G014365	2068	1027.67	2711.52	1.42376	4.55614e-178	Up	8.38768e-179	NA	GO:0016021//integral component of membrane	GO:0005215//transporter activity	GO:0055085//transmembrane transport	K14611//solute carrier family 23 (nucleobase transporter), member 1/2	AIS71908.1//nucleobase-ascorbate transporter 6-like isoform 1 [Nicotiana tabacum]
101250135	1163	2221.58	696.66	-1.64903	5.04251e-178	Down	9.29892e-179	LOC101250135	NA	NA	NA	NA	gi|723715785|ref|XP_010323834.1|//PREDICTED: glycine-rich cell wall structural protein 1-like [Solanum lycopersicum]
101248861	3702	4560.95	2189.83	-1.03448	5.59354e-178	Down	1.03268e-178	LOC101248861	NA	GO:0043531//ADP binding	GO:0006952//defense response	K13457//disease resistance protein RPM1	gi|723753706|ref|XP_004253120.2|//PREDICTED: putative inactive disease susceptibility protein LOV1 [Solanum lycopersicum]
101243903	5872	1523.75	329.7	-2.18437	5.68848e-178	Down	1.05081e-178	LOC101243903	NA	NA	NA	K11000//callose synthase [EC:2.4.1.-]	gi|460395564|ref|XP_004243352.1|//PREDICTED: callose synthase 12 [Solanum lycopersicum]
101246665	4046	2210.26	690.99	-1.65345	8.48039e-178	Down	1.56921e-178	LOC101246665	NA	NA	NA	K01555//fumarylacetoacetase [EC:3.7.1.2]	gi|460368215|ref|XP_004229963.1|//PREDICTED: BAG family molecular chaperone regulator 6 [Solanum lycopersicum]
BGI_novel_G002843	2077	785.3	6.14	-6.97483	9.0673e-178	Down	1.67876e-178	NA	GO:0016021//integral component of membrane	NA	GO:0055085//transmembrane transport	K14500//BR-signaling kinase [EC:2.7.11.1]	XP_004230653.1//PREDICTED: probable sphingolipid transporter spinster homolog 2 isoform X1 [Solanum lycopersicum]
BGI_novel_G022663	2299	3638.88	1570.95	-1.18782	1.57737e-177	Down	2.92206e-178	NA	GO:0043231//intracellular membrane-bounded organelle	GO:0080043//quercetin 3-O-glucosyltransferase activity;GO:0080044//quercetin 7-O-glucosyltransferase activity;GO:0016758//transferase activity, transferring hexosyl groups	GO:0008152//metabolic process	K21354//beta-D-glucosyl crocetin beta-1,6-glucosyltransferase [EC:2.4.1.330]	XP_004249992.1//PREDICTED: beta-D-glucosyl crocetin beta-1,6-glucosyltransferase-like [Solanum lycopersicum]
BGI_novel_G014005	1286	1549.14	343	-2.15115	1.63471e-177	Down	3.03e-178	NA	NA	GO:0016788//hydrolase activity, acting on ester bonds	NA	K21026//acetylajmaline esterase [EC:3.1.1.80];K10691//E3 ubiquitin-protein ligase UBR4 [EC:2.3.2.27];K01188//beta-glucosidase [EC:3.2.1.21];K00679//phospholipid:diacylglycerol acyltransferase [EC:2.3.1.158]	NP_001333717.1//GDSL-like lipase/acylhydrolase superfamily protein precursor [Solanum lycopersicum]
BGI_novel_G012668	2132	1657.39	397.27	-2.03669	3.88507e-177	Down	7.22151e-178	NA	GO:0016021//integral component of membrane	NA	NA	NA	XP_004239782.1//PREDICTED: phosphatidylinositol/phosphatidylcholine transfer protein SFH12 [Solanum lycopersicum]
BGI_novel_G014230	1827	896.7	2490.75	1.49792	1.77468e-176	Up	3.31735e-177	NA	NA	GO:0004185//serine-type carboxypeptidase activity	NA	K16297//serine carboxypeptidase-like clade II [EC:3.4.16.-]	XP_004241645.1//PREDICTED: serine carboxypeptidase-like 45 [Solanum lycopersicum]
BGI_novel_G015438	4780	1894.02	521.66	-1.83624	2.17881e-176	Down	4.07507e-177	NA	GO:0005643//nuclear pore;GO:0009506//plasmodesma;GO:0005730//nucleolus;GO:0044611//nuclear pore inner ring;GO:0005886//plasma membrane;GO:0009507//chloroplast	GO:0017056//structural constituent of nuclear pore	GO:0036228//protein localization to nuclear inner membrane;GO:0006913//nucleocytoplasmic transport;GO:0000972//transcription-dependent tethering of RNA polymerase II gene DNA at nuclear periphery;GO:0006606//protein import into nucleus;GO:0006405//RNA export from nucleus	K14312//nuclear pore complex protein Nup155	XP_004242776.1//PREDICTED: nuclear pore complex protein NUP155 [Solanum lycopersicum]
BGI_novel_G023624	4259	2967.97	1147.3	-1.3472	2.89796e-176	Down	5.42313e-177	NA	NA	GO:0016614//oxidoreductase activity, acting on CH-OH group of donors;GO:0009055//electron transfer activity;GO:0051537//2 iron, 2 sulfur cluster binding;GO:0005506//iron ion binding;GO:0050660//flavin adenine dinucleotide binding	NA	K00106//xanthine dehydrogenase/oxidase [EC:1.17.1.4 1.17.3.2]	XP_016473563.1//PREDICTED: xanthine dehydrogenase 1-like isoform X1 [Nicotiana tabacum]
BGI_novel_G011358	4090	1614.81	3594.68	1.17853	4.03292e-176	Up	7.55552e-177	NA	NA	GO:0003723//RNA binding;GO:0003968//RNA-directed 5'-3' RNA polymerase activity	GO:0031047//gene silencing by RNA	K11699//RNA-dependent RNA polymerase [EC:2.7.7.48]	NP_001234319.1//RNA-directed RNA polymerase [Solanum lycopersicum]
BGI_novel_G021402	2043	1580.34	361.52	-2.10405	4.11742e-176	Down	7.71814e-177	NA	GO:0016021//integral component of membrane;GO:0005737//cytoplasm	NA	NA	K22138//mitochondrial pyruvate carrier 1	XP_004248822.1//PREDICTED: uncharacterized protein At1g04910 isoform X1 [Solanum lycopersicum]
BGI_novel_G003399	1425	4694.45	2292.8	-1.00981	4.47477e-176	Down	8.39739e-177	NA	GO:0016021//integral component of membrane	NA	NA	K08835//serine/threonine-protein kinase OSR1/STK39 [EC:2.7.11.1]	XP_004231721.1//PREDICTED: uncharacterized protein LOC101268332 [Solanum lycopersicum]
BGI_novel_G011515	1489	1449.96	298.99	-2.25381	5.01377e-176	Down	9.41413e-177	NA	GO:0016021//integral component of membrane	GO:0008375//acetylglucosaminyltransferase activity	NA	NA	XP_004238911.1//PREDICTED: uncharacterized protein LOC101249358 [Solanum lycopersicum]
101256572	552	1000.74	2655.93	1.43218	5.35899e-176	Up	1.0068e-176	LOC101256572	NA	NA	NA	NA	gi|565351432|ref|XP_006342662.1|//PREDICTED: zinc finger protein ZAT10-like [Solanum tuberosum]
BGI_novel_G020091	1764	4667.59	2274.82	-1.01289	5.95606e-176	Down	1.11959e-176	NA	GO:0016021//integral component of membrane	NA	GO:0008643//carbohydrate transport	K08145//MFS transporter, SP family, solute carrier family 2 (facilitated glucose transporter), member 8	XP_009614908.1//PREDICTED: sugar transporter ERD6-like 7 [Nicotiana tomentosiformis]
101258748	1787	478.65	1765.45	1.90703	5.97139e-176	Up	1.1231e-176	LOC101258748	NA	NA	NA	K05868	gi|460385473|ref|XP_004238428.1|//PREDICTED: G2/mitotic-specific cyclin-2 [Solanum lycopersicum]
101250852	858	1085.71	2789.18	1.38524	9.50927e-176	Up	1.79249e-176	LOC101250852	NA	NA	NA	NA	gi|460409303|ref|XP_004250078.1|//PREDICTED: uncharacterized protein LOC101250852 [Solanum lycopersicum]
BGI_novel_G005107	2564	43.06	800.38	4.2403	1.11109e-175	Up	2.09555e-176	NA	NA	NA	NA	K00434//L-ascorbate peroxidase [EC:1.11.1.11]	XP_004233743.1//PREDICTED: protein POLLENLESS 3-LIKE 2 [Solanum lycopersicum]
101262428	1743	200.5	1200.01	2.60541	2.99576e-175	Up	5.6627e-176	LOC101262428	NA	NA	NA	K05863//solute carrier family 25 (mitochondrial adenine nucleotide translocator), member 4/5/6/31	gi|460392007|ref|XP_004241609.1|//PREDICTED: ADP,ATP carrier protein ER-ANT1 [Solanum lycopersicum]
101249025	2028	747.09	16.75	-5.45502	3.33021e-175	Down	6.29838e-176	LOC101249025	NA	NA	NA	K11547//kinetochore protein NDC80	gi|460369420|ref|XP_004230560.1|//PREDICTED: kinetochore protein NDC80 homolog [Solanum lycopersicum]
101261854	1691	4020.67	1837.73	-1.10548	7.53983e-175	Down	1.42679e-175	LOC101261854	NA	NA	NA	K15502//serine/threonine-protein phosphatase 6 regulatory ankyrin repeat subunit A	gi|460404150|ref|XP_004247547.1|//PREDICTED: serine/threonine-protein phosphatase 6 regulatory ankyrin repeat subunit C-like [Solanum lycopersicum]
101250250	3661	32.39	765.41	4.58665	2.38267e-174	Up	4.5188e-175	LOC101250250	NA	NA	NA	K20223//importin-7	gi|460366326|ref|XP_004229037.1|//PREDICTED: uncharacterized protein LOC101250250 [Solanum lycopersicum]
100191123	1150	1267.6	3062.15	1.29648	2.6164e-174	Up	4.9648e-175	MYB12	NA	GO:0003677//DNA binding	GO:0009699//phenylpropanoid biosynthetic process;GO:0009963//positive regulation of flavonoid biosynthetic process	K09422//transcription factor MYB, plant	gi|350534530|ref|NP_001234401.1|//MYB12 protein [Solanum lycopersicum]
BGI_novel_G016271	1152	2077.54	4247.12	1.05564	3.07572e-174	Up	5.83963e-175	NA	GO:0005768//endosome	GO:0005525//GTP binding;GO:0003924//GTPase activity	NA	K07904//Ras-related protein Rab-11A;K07976//Rab family, other	XP_004243397.1//PREDICTED: ras-related protein RABA1f [Solanum lycopersicum]
BGI_novel_G023408	1094	9	735.27	6.37624	4.39325e-174	Up	8.34573e-175	NA	GO:0016021//integral component of membrane	NA	NA	NA	XP_010313063.1//PREDICTED: uncharacterized protein LOC101261986 [Solanum lycopersicum]
101263005	590	2942.39	1140.37	-1.34345	5.03912e-174	Down	9.57794e-175	LOC101263005	NA	NA	NA	NA	gi|460415124|ref|XP_004252910.1|//PREDICTED: late embryogenesis abundant protein Lea5-like [Solanum lycopersicum]
BGI_novel_G001958	3649	2027.43	4174.52	1.06599	5.18417e-174	Up	9.85909e-175	NA	GO:0016592//mediator complex;GO:0009295//nucleoid;GO:0005739//mitochondrion;GO:0005694//chromosome;GO:0009507//chloroplast	GO:0003677//DNA binding;GO:0005524//ATP binding;GO:0003918//DNA topoisomerase type II (ATP-hydrolyzing) activity	GO:0006265//DNA topological change	K02469//DNA gyrase subunit A [EC:5.99.1.3]	XP_004230064.1//PREDICTED: DNA gyrase subunit A, chloroplastic/mitochondrial isoform X1 [Solanum lycopersicum]
BGI_novel_G007684	3506	6.07	755.1	6.98286	9.20778e-174	Up	1.75207e-174	NA	NA	NA	NA	K01893//asparaginyl-tRNA synthetase [EC:6.1.1.22]	XP_004234329.1//PREDICTED: uncharacterized protein LOC101254569 [Solanum lycopersicum]
BGI_novel_G022096	1226	955.53	2569.25	1.45101	1.20437e-173	Up	2.29296e-174	NA	GO:0005634//nucleus	GO:0003677//DNA binding	GO:0006281//DNA repair;GO:0006260//DNA replication;GO:0006310//DNA recombination	K10739//replication factor A2	NP_001316348.1//replication protein A 32 kDa subunit B [Solanum lycopersicum]
101255129	6897	1756.08	456.78	-1.91875	1.44777e-173	Down	2.75787e-174	LOC101255129	NA	NA	NA	K11978//E3 ubiquitin-protein ligase UBR3 [EC:2.3.2.27];K10626	gi|723727440|ref|XP_010325853.1|//PREDICTED: uncharacterized protein LOC101255129 [Solanum lycopersicum]
BGI_novel_G010987	2030	1680.27	3672.49	1.1521	1.46105e-173	Up	2.7847e-174	NA	NA	GO:0005524//ATP binding;GO:0004672//protein kinase activity;GO:0005509//calcium ion binding	NA	K13412//calcium-dependent protein kinase [EC:2.7.11.1]	XP_009798869.1//PREDICTED: calcium-dependent protein kinase 29 [Nicotiana sylvestris]
BGI_novel_G019573	1869	1549.77	353.18	-2.10955	2.62537e-173	Down	5.01487e-174	NA	GO:0016021//integral component of membrane	NA	NA	NA	XP_004246288.1//PREDICTED: uncharacterized protein LOC101261947 [Solanum lycopersicum]
BGI_novel_G023157	1278	1311.78	0	-11.3333	3.72698e-173	Down	7.12302e-174	NA	GO:0009535//chloroplast thylakoid membrane;GO:0016021//integral component of membrane	NA	GO:0048564//photosystem I assembly	K02717//photosystem II oxygen-evolving enhancer protein 2	XP_004250374.1//PREDICTED: uncharacterized protein LOC101263865 [Solanum lycopersicum]
BGI_novel_G016083	4158	1373.91	269.8	-2.32429	3.87459e-173	Down	7.40918e-174	NA	GO:0016021//integral component of membrane;GO:0005886//plasma membrane	GO:0005524//ATP binding;GO:0004675//transmembrane receptor protein serine/threonine kinase activity	GO:0006468//protein phosphorylation;GO:0007166//cell surface receptor signaling pathway	K13429//chitin elicitor receptor kinase 1	NP_001233930.2//LysM receptor-like kinase isoform 1a precursor [Solanum lycopersicum]
101264432	1154	2528.25	891.23	-1.48024	3.91466e-173	Down	7.48991e-174	LOC101264432	NA	NA	NA	K15227//arogenate dehydrogenase (NADP+), plant [EC:1.3.1.78]	gi|460390550|ref|XP_004240892.1|//PREDICTED: arogenate dehydrogenase 1, chloroplastic-like [Solanum lycopersicum]
101248913	3300	1243.45	211.36	-2.53254	4.40728e-173	Down	8.44169e-174	LOC101248913	NA	NA	NA	K00924//kinase [EC:2.7.1.-]	gi|460367272|ref|XP_004229499.1|//PREDICTED: leucine-rich repeat receptor-like serine/threonine-protein kinase BAM3 [Solanum lycopersicum]
BGI_novel_G017972	4617	2876	1103	-1.3586	4.69836e-173	Down	9.00414e-174	NA	GO:0016021//integral component of membrane	GO:0005524//ATP binding;GO:0016887//ATPase activity	GO:0006810//transport	K05681//ATP-binding cassette, subfamily G (WHITE), member 2	XP_015083661.1//PREDICTED: pleiotropic drug resistance protein 1-like isoform X1 [Solanum pennellii]
BGI_novel_G021678	2500	3279.55	1358.01	-1.24797	5.12026e-173	Down	9.82343e-174	NA	NA	GO:0005524//ATP binding;GO:0004672//protein kinase activity	NA	K04733//interleukin-1 receptor-associated kinase 4 [EC:2.7.11.1]	XP_004249041.1//PREDICTED: probable serine/threonine-protein kinase NAK [Solanum lycopersicum]
BGI_novel_G012187	1877	884.95	70.54	-3.62505	7.83277e-173	Down	1.50357e-173	NA	NA	GO:0004185//serine-type carboxypeptidase activity	NA	K16298//serine carboxypeptidase-like clade IV [EC:3.4.16.-]	XP_006342273.1//PREDICTED: serine carboxypeptidase-like [Solanum tuberosum]
BGI_novel_G019408	1899	223.3	1238.55	2.49563	2.01566e-172	Up	3.87558e-173	NA	NA	NA	NA	K09562//hsp70-interacting protein	XP_004246451.1//PREDICTED: thaumatin-like protein [Solanum lycopersicum]
BGI_novel_G011514	2171	1450.1	3324.85	1.22117	2.24383e-172	Up	4.319e-173	NA	GO:0016021//integral component of membrane	GO:0005524//ATP binding;GO:0004672//protein kinase activity	NA	K04733//interleukin-1 receptor-associated kinase 4 [EC:2.7.11.1]	XP_019069622.1//PREDICTED: probable leucine-rich repeat receptor-like protein kinase At1g68400 [Solanum lycopersicum]
101255509	746	1868.47	3932.7	1.0977	5.97837e-172	Up	1.15199e-172	LOC101255509	NA	NA	NA	K03676//glutaredoxin 3	gi|723715362|ref|XP_010323755.1|//PREDICTED: glutaredoxin-C9-like [Solanum lycopersicum]
100736514	2428	3207.71	1317.01	-1.26024	7.50547e-172	Down	1.44782e-172	Bti9	GO:0016021//integral component of membrane	GO:0004674//protein serine/threonine kinase activity;GO:0005524//ATP binding	GO:0006468//protein phosphorylation	K13429//chitin elicitor receptor kinase 1	gi|987996520|ref|NP_001233930.2|//LysM receptor-like kinase isoform 1a precursor [Solanum lycopersicum]
BGI_novel_G024155	748	609.41	1978.11	1.72267	1.57308e-171	Up	3.03616e-172	NA	GO:0005634//nucleus;GO:0000790//nuclear chromatin;GO:0000786//nucleosome	GO:0003677//DNA binding;GO:0046982//protein heterodimerization activity	GO:0006342//chromatin silencing	K11251//histone H2A	XP_004251321.2//PREDICTED: histone H2A isoform X2 [Solanum lycopersicum]
BGI_novel_G023770	1760	1500.81	334.48	-2.14172	4.28258e-171	Down	8.28366e-172	NA	NA	GO:0004553//hydrolase activity, hydrolyzing O-glycosyl compounds	GO:0005975//carbohydrate metabolic process	K19891//glucan endo-1,3-beta-glucosidase 1/2/3 [EC:3.2.1.39]	XP_011090341.1//glucan endo-1,3-beta-glucosidase 14 [Sesamum indicum]
101255453	1113	1545.33	3457.09	1.18568	4.55439e-171	Up	8.81418e-172	LOC101255453	NA	NA	NA	K11648//SWI/SNF-related matrix-associated actin-dependent regulator of chromatin subfamily B member 1	gi|460409842|ref|XP_004250346.1|//PREDICTED: chromatin structure-remodeling complex protein BSH [Solanum lycopersicum]
101263431	1850	1814	494	-1.85256	4.87515e-171	Down	9.44007e-172	LOC101263431	NA	NA	NA	K01592//tyrosine decarboxylase [EC:4.1.1.25]	gi|460395527|ref|XP_004243334.1|//PREDICTED: aromatic-L-amino-acid decarboxylase-like [Solanum lycopersicum]
101244675	3226	2907.73	1130.99	-1.33827	5.46154e-171	Down	1.05812e-171	LOC101244675	NA	NA	NA	K01507//inorganic pyrophosphatase [EC:3.6.1.1];K12662//U4/U6 small nuclear ribonucleoprotein PRP4;K14963//COMPASS component SWD3	gi|723709580|ref|XP_010322740.1|//PREDICTED: transcriptional corepressor LEUNIG isoform X1 [Solanum lycopersicum]
BGI_novel_G008834	2459	1838.76	507.56	-1.83305	6.79574e-171	Down	1.31804e-171	NA	GO:0016021//integral component of membrane	GO:0008374//O-acyltransferase activity	GO:0006629//lipid metabolic process	K00679//phospholipid:diacylglycerol acyltransferase [EC:2.3.1.158]	XP_004235572.1//PREDICTED: phospholipid:diacylglycerol acyltransferase 1 [Solanum lycopersicum]
101250666	707	63.11	838.21	3.7554	9.03899e-171	Up	1.75407e-171	LOC101250666	NA	NA	NA	K07213//copper chaperone;K10752//histone-binding protein RBBP4	gi|460377223|ref|XP_004234393.1|//PREDICTED: heavy metal-associated isoprenylated plant protein 26 [Solanum lycopersicum]
BGI_novel_G004722	557	301.17	1394.95	2.2356	1.50113e-170	Up	2.91461e-171	NA	GO:0016021//integral component of membrane	NA	NA	NA	XP_004232783.1//PREDICTED: uncharacterized protein LOC101249232 [Solanum lycopersicum]
778306	960	57	819.1	3.86904	2.71398e-170	Up	5.27233e-171	LOC778306	NA	NA	NA	K09264//MADS-box transcription factor, plant	gi|806776623|ref|NP_001234075.2|//TPI [Solanum lycopersicum]
BGI_novel_G013604	1256	793.3	2283.75	1.5495	3.822e-170	Up	7.42883e-171	NA	GO:0009506//plasmodesma;GO:0009504//cell plate;GO:0005622//intracellular;GO:0012505//endomembrane system;GO:0009524//phragmoplast;GO:0016021//integral component of membrane;GO:0031201//SNARE complex;GO:0005886//plasma membrane	GO:0000149//SNARE binding;GO:0005484//SNAP receptor activity	GO:0006886//intracellular protein transport;GO:0006906//vesicle fusion;GO:0048278//vesicle docking;GO:0006887//exocytosis;GO:0016192//vesicle-mediated transport	K08486//syntaxin 1B/2/3	XP_004241020.1//PREDICTED: syntaxin-related protein KNOLLE [Solanum lycopersicum]
101248739	2627	1035.77	130.55	-2.964	4.38136e-170	Down	8.52066e-171	LOC101248739	NA	NA	NA	K10609//cullin 4	gi|460374654|ref|XP_004233125.1|//PREDICTED: cullin-4 [Solanum lycopersicum]
BGI_novel_G020003	2269	2090.05	4232.44	1.04199	5.1024e-170	Up	9.92825e-171	NA	NA	GO:0003697//single-stranded DNA binding	GO:0006260//DNA replication	K14484//auxin-responsive protein IAA	NP_001334117.1//single-stranded DNA binding protein-like protein [Solanum lycopersicum]
BGI_novel_G013320	3822	684.09	2098.85	1.64137	5.77762e-170	Up	1.12482e-170	NA	NA	GO:0005524//ATP binding;GO:0051082//unfolded protein binding	GO:0006457//protein folding;GO:0006950//response to stress	K04079//molecular chaperone HtpG	XP_015079504.1//PREDICTED: heat shock protein 83-like [Solanum pennellii]
101262335	3968	2176.34	697.43	-1.61775	9.2351e-170	Down	1.7989e-170	LOC101262335	NA	NA	NA	K20283//golgin subfamily A member 4;K20478//golgin subfamily B member 1	gi|460400191|ref|XP_004245619.1|//PREDICTED: cingulin isoform X1 [Solanum lycopersicum]
BGI_novel_G022301	1958	1687.96	3655.26	1.13873	1.38362e-169	Up	2.69805e-170	NA	GO:0009941//chloroplast envelope	GO:0016740//transferase activity;GO:0046510//UDP-sulfoquinovose:DAG sulfoquinovosyltransferase activity	GO:0009247//glycolipid biosynthetic process;GO:0046506//sulfolipid biosynthetic process	K06119//sulfoquinovosyltransferase [EC:2.4.1.-]	XP_004249580.1//PREDICTED: sulfoquinovosyl transferase SQD2 [Solanum lycopersicum]
BGI_novel_G001861	2759	1113.46	2793.89	1.35126	1.46177e-169	Up	2.85198e-170	NA	NA	NA	NA	K14486//auxin response factor	XP_010327130.1//PREDICTED: auxin response factor 18 [Solanum lycopersicum]
BGI_novel_G015690	1134	1604.96	389.75	-2.01788	1.46676e-169	Down	2.86325e-170	NA	GO:0016021//integral component of membrane	NA	NA	K00128//aldehyde dehydrogenase (NAD+) [EC:1.2.1.3];K17345//tetraspanin-5;K17294//tetraspanin-4;K17356//tetraspanin-13/31	XP_006361826.1//PREDICTED: tetraspanin-2-like [Solanum tuberosum]
BGI_novel_G011233	2203	1804.9	493.76	-1.846	2.22177e-169	Down	4.34174e-170	NA	NA	NA	NA	K08472//mlo protein;K07541//phosphatidylinositol glycan, class X	XP_004238724.1//PREDICTED: uncharacterized protein LOC101243707 [Solanum lycopersicum]
101266919	2239	2141.47	679.14	-1.63279	2.78438e-169	Down	5.44411e-170	LOC101266919	NA	NA	NA	K00130//betaine-aldehyde dehydrogenase [EC:1.2.1.8];K00128//aldehyde dehydrogenase (NAD+) [EC:1.2.1.3]	gi|460415150|ref|XP_004252923.1|//PREDICTED: aldehyde dehydrogenase 22A1 [Solanum lycopersicum]
BGI_novel_G021065	1133	435.37	1651.02	1.94708	3.10904e-169	Up	6.08216e-170	NA	GO:0019773//proteasome core complex, alpha-subunit complex;GO:0005634//nucleus;GO:0005737//cytoplasm	GO:0004298//threonine-type endopeptidase activity	GO:0006511//ubiquitin-dependent protein catabolic process	K02726//20S proteasome subunit alpha 2 [EC:3.4.25.1]	XP_004248192.1//PREDICTED: proteasome subunit alpha type-2-A [Solanum lycopersicum]
BGI_novel_G006411	2631	1701.77	440.11	-1.92707	3.23967e-169	Down	6.3411e-170	NA	GO:0016021//integral component of membrane	GO:0005524//ATP binding;GO:0004672//protein kinase activity;GO:0030247//polysaccharide binding	NA	K04733//interleukin-1 receptor-associated kinase 4 [EC:2.7.11.1]	XP_004234168.1//PREDICTED: rust resistance kinase Lr10 [Solanum lycopersicum]
101261849	1417	1269.59	0	-11.2861	5.62175e-169	Down	1.10213e-169	LOC101261849	NA	NA	NA	NA	gi|723654798|ref|XP_010323732.1|//PREDICTED: uncharacterized protein LOC101261849 [Solanum lycopersicum]
101267211	3242	839.95	60.37	-3.77437	6.59056e-169	Down	1.29275e-169	LOC101267211	NA	NA	NA	K00558//DNA (cytosine-5)-methyltransferase 1 [EC:2.1.1.37]	gi|460414983|ref|XP_004252840.1|//PREDICTED: DNA (cytosine-5)-methyltransferase CMT3 [Solanum lycopersicum]
BGI_novel_G016358	3039	717.57	12.37	-5.83417	7.53156e-169	Down	1.47812e-169	NA	NA	NA	NA	K04733//interleukin-1 receptor-associated kinase 4 [EC:2.7.11.1];K13415//protein brassinosteroid insensitive 1 [EC:2.7.10.1 2.7.11.1]	XP_019252587.1//PREDICTED: protein STRUBBELIG-RECEPTOR FAMILY 3-like isoform X1 [Nicotiana attenuata]
BGI_novel_G011549	4179	1133.75	2820.64	1.33895	8.27699e-169	Up	1.62529e-169	NA	NA	GO:0004553//hydrolase activity, hydrolyzing O-glycosyl compounds;GO:0030246//carbohydrate binding	GO:0005975//carbohydrate metabolic process	K15925//alpha-D-xyloside xylohydrolase [EC:3.2.1.177]	XP_016446448.1//PREDICTED: alpha-xylosidase 1-like [Nicotiana tabacum]
101246182	873	86.11	892	3.39682	2.21338e-168	Up	4.35785e-169	LOC101246182	NA	NA	NA	K03006//DNA-directed RNA polymerase II subunit RPB1 [EC:2.7.7.6];K19891//glucan endo-1,3-beta-glucosidase 1/2/3 [EC:3.2.1.39]	gi|460404984|ref|XP_004247958.1|//PREDICTED: PLASMODESMATA CALLOSE-BINDING PROTEIN 3 [Solanum lycopersicum]
101262037	1493	1138.46	2824.98	1.33519	2.41298e-168	Up	4.75337e-169	LOC101262037	NA	NA	NA	K15407//queuine tRNA-ribosyltransferase subunit QTRTD1 [EC:2.4.2.29]	gi|460401728|ref|XP_004246369.1|//PREDICTED: uncharacterized protein LOC101262037 [Solanum lycopersicum]
BGI_novel_G010696	2364	1393.57	3207	1.22647	1.87145e-167	Up	3.69641e-168	NA	GO:0005634//nucleus;GO:0005829//cytosol;GO:0005886//plasma membrane	NA	NA	NA	NP_001234563.1//dem protein [Solanum lycopersicum]
BGI_novel_G011034	1086	1957.35	4024.8	1.06405	2.43011e-167	Up	4.80493e-168	NA	NA	NA	NA	NA	XP_004238424.1//PREDICTED: uncharacterized protein LOC101257560 [Solanum lycopersicum]
BGI_novel_G023389	3591	2378.94	823.61	-1.50625	3.11964e-167	Down	6.17485e-168	NA	NA	NA	NA	K12821//pre-mRNA-processing factor 40	XP_004250825.1//PREDICTED: pre-mRNA-processing protein 40A isoform X2 [Solanum lycopersicum]
104648561	3192	1098.84	160.9	-2.74771	3.59958e-167	Down	7.1286e-168	LOC104648561	NA	NA	NA	K04733//interleukin-1 receptor-associated kinase 4 [EC:2.7.11.1]	gi|460397281|ref|XP_004244196.1|//PREDICTED: receptor-like protein kinase THESEUS 1 [Solanum lycopersicum]
101268009	1049	2752.2	1049.76	-1.36649	3.87437e-167	Down	7.67685e-168	LOC101268009	NA	NA	NA	K06890//uncharacterized protein	gi|460396231|ref|XP_004243681.1|//PREDICTED: BI1-like protein [Solanum lycopersicum]
101247914	1683	3992.19	1858.18	-1.07926	4.6057e-167	Down	9.13077e-168	LOC101247914	NA	NA	NA	K00052//3-isopropylmalate dehydrogenase [EC:1.1.1.85]	gi|460386440|ref|XP_004238906.1|//PREDICTED: 3-isopropylmalate dehydrogenase, chloroplastic [Solanum lycopersicum]
BGI_novel_G017838	4567	827.87	2322.52	1.51225	5.47016e-167	Up	1.08503e-167	NA	NA	NA	NA	K15601//lysine-specific demethylase 3 [EC:1.14.11.-]	XP_019070835.1//PREDICTED: uncharacterized protein LOC101244102 isoform X10 [Solanum lycopersicum]
BGI_novel_G005177	1526	268.14	1310.25	2.31282	5.8076e-167	Up	1.15257e-167	NA	GO:0005634//nucleus	GO:0008270//zinc ion binding;GO:0043565//sequence-specific DNA binding;GO:0003700//DNA binding transcription factor activity	GO:0006351//transcription, DNA-templated;GO:0045893//positive regulation of transcription, DNA-templated	K17895//GATA-binding protein 3;K21630//GATA-type zinc finger protein 1	XP_004232457.2//PREDICTED: GATA transcription factor 5-like [Solanum lycopersicum]
101252046	1126	2376.87	823.56	-1.50508	6.71525e-167	Down	1.3334e-167	LOC101252046	GO:0022627//cytosolic small ribosomal subunit	GO:0003735//structural constituent of ribosome;GO:0019843//rRNA binding	GO:0006412//translation	K02987//small subunit ribosomal protein S4e	gi|460374672|ref|XP_004233134.1|//PREDICTED: 40S ribosomal protein S4-like [Solanum lycopersicum]
101255131	3167	1632.96	3555.8	1.14672	7.32414e-167	Up	1.45508e-167	LOC101255131	NA	NA	NA	NA	gi|460366586|ref|XP_004229162.1|//PREDICTED: zinc finger protein 598-like [Solanum lycopersicum]
101243659	730	1926.56	566.75	-1.74121	7.88256e-167	Down	1.56684e-167	SAP11	NA	GO:0008270//zinc ion binding	NA	NA	gi|987437877|ref|NP_001306921.1|//stress-associated protein 11 [Solanum lycopersicum]
BGI_novel_G003528	3073	405.1	1581.19	1.98869	1.10031e-166	Up	2.18828e-167	NA	GO:0005634//nucleus	GO:0008289//lipid binding;GO:0003677//DNA binding	NA	K09338//homeobox-leucine zipper protein	XP_010315636.1//PREDICTED: homeobox-leucine zipper protein ATHB-14-like [Solanum lycopersicum]
BGI_novel_G006109	1986	1223.3	2944.05	1.29106	1.39903e-166	Up	2.78676e-167	NA	NA	NA	NA	K21596//calmodulin-binding transcription activator	XP_004231816.1//PREDICTED: protein WVD2-like 4 [Solanum lycopersicum]
101261722	3632	4095.58	1931.39	-1.0604	1.52495e-166	Down	3.0392e-167	LOC101261722	NA	NA	NA	K14157//alpha-aminoadipic semialdehyde synthase [EC:1.5.1.8 1.5.1.9]	gi|460394627|ref|XP_004242902.1|//PREDICTED: alpha-aminoadipic semialdehyde synthase [Solanum lycopersicum]
101244337	3077	1208	2920.1	1.29743	1.70869e-166	Up	3.40716e-167	LOC101244337	NA	NA	NA	K03695//ATP-dependent Clp protease ATP-binding subunit ClpB	gi|460410098|ref|XP_004250468.1|//PREDICTED: uncharacterized protein LOC101244337 [Solanum lycopersicum]
BGI_novel_G002370	3716	686.48	2082.92	1.62535	2.33486e-166	Up	4.66067e-167	NA	NA	NA	NA	K20093//DNA excision repair protein ERCC-6-like [EC:3.6.4.12];K11323//histone arginine demethylase JMJD6 [EC:1.14.11.-]	XP_004230348.1//PREDICTED: FACT complex subunit SPT16-like [Solanum lycopersicum]
BGI_novel_G000162	1495	1939.63	3991.42	1.06515	3.01302e-166	Up	6.01751e-167	NA	NA	NA	NA	K00208//enoyl-[acyl-carrier protein] reductase I [EC:1.3.1.9 1.3.1.10]	XP_010315949.1//PREDICTED: enoyl-[acyl-carrier-protein] reductase [NADH], chloroplastic-like [Solanum lycopersicum]
101266384	3982	869.66	2385	1.4795	5.09366e-166	Up	1.01943e-166	LOC101266384	NA	NA	NA	K18998//RNA polymerase II C-terminal domain phosphatase-like 1/2 [EC:3.1.3.16]	gi|460374089|ref|XP_004232844.1|//PREDICTED: RNA polymerase II C-terminal domain phosphatase-like 1 [Solanum lycopersicum]
101248704	1187	1664.64	429.42	-1.93072	5.61369e-166	Down	1.12409e-166	LOC101248704	NA	GO:0003735//structural constituent of ribosome	GO:0006412//translation	K02935//large subunit ribosomal protein L7/L12	gi|460401982|ref|XP_004246494.1|//PREDICTED: 50S ribosomal protein L12, chloroplastic [Solanum lycopersicum]
BGI_novel_G015927	5322	714.44	20.19	-5.12107	7.09016e-166	Down	1.42049e-166	NA	NA	NA	NA	K17604//zinc finger SWIM domain-containing protein 3	XP_006357870.1//PREDICTED: protein FAR-RED ELONGATED HYPOCOTYL 3 isoform X1 [Solanum tuberosum]
101261115	2118	1793.13	497.97	-1.82432	1.26101e-165	Down	2.52902e-166	LOC101261115	NA	NA	NA	K07277//outer membrane protein insertion porin family	gi|460384968|ref|XP_004238178.1|//PREDICTED: sorting and assembly machinery component 50 homolog B-like [Solanum lycopersicum]
100736445	2613	135.8	1007.59	2.91539	1.40577e-165	Up	2.82083e-166	ARF9	GO:0005634//nucleus	GO:0003677//DNA binding	GO:0006355//regulation of transcription, DNA-templated;GO:0009734//auxin-activated signaling pathway	K14486//auxin response factor	gi|723723625|ref|XP_010325288.1|//PREDICTED: auxin response factor 9 isoform X1 [Solanum lycopersicum]
543989	912	2183.9	4329.05	1.01118	1.4165e-165	Up	2.84385e-166	LOC543989	GO:0005737//cytoplasm	GO:0005179//hormone activity	NA	NA	gi|822476316|ref|NP_001296103.1|//systemin soform 1 [Solanum lycopersicum]
101268052	880	1866.79	539.02	-1.76812	3.68689e-165	Down	7.40972e-166	LOC101268052	NA	NA	NA	NA	gi|460373254|ref|XP_004232436.1|//PREDICTED: desiccation-related protein clone PCC6-19-like [Solanum lycopersicum]
101248633	1438	962.01	2527.45	1.41759	4.93023e-165	Up	9.92404e-166	LOC101248633	NA	GO:0008017//microtubule binding	NA	K10436//microtubule-associated protein, RP/EB family	gi|460372120|ref|XP_004231880.1|//PREDICTED: microtubule-associated protein RP/EB family member 1C [Solanum lycopersicum]
101257338	2340	496.96	1742.97	1.83438	6.12559e-165	Up	1.2343e-165	LOC101257338	GO:0005634//nucleus	GO:0017005//3'-tyrosyl-DNA phosphodiesterase activity	GO:0006281//DNA repair	K10862//tyrosyl-DNA phosphodiesterase 1 [EC:3.1.4.-]	gi|723679977|ref|XP_010317667.1|//PREDICTED: tyrosyl-DNA phosphodiesterase 1 [Solanum lycopersicum]
BGI_novel_G011833	2232	503.68	1753.29	1.82352	1.40423e-164	Up	2.83393e-165	NA	GO:0005887//integral component of plasma membrane;GO:0016021//integral component of membrane	GO:0005315//inorganic phosphate transmembrane transporter activity	GO:0006817//phosphate ion transport;GO:0035435//phosphate ion transmembrane transport	K14640//solute carrier family 20 (sodium-dependent phosphate transporter)	XP_004239128.1//PREDICTED: inorganic phosphate transporter 2-1, chloroplastic [Solanum lycopersicum]
BGI_novel_G005577	1920	177.75	1100.77	2.65462	3.52314e-164	Up	7.12495e-165	NA	GO:0005634//nucleus	GO:0043565//sequence-specific DNA binding;GO:0003700//DNA binding transcription factor activity	GO:0006351//transcription, DNA-templated	K08819//cyclin-dependent kinase 12/13 [EC:2.7.11.22 2.7.11.23];K13424//WRKY transcription factor 33	NP_001334317.1//WRKY transcription factor 3 [Solanum lycopersicum]
101262846	970	0	1205.98	11.26	5.54521e-164	Up	1.12259e-164	LOC101262846	NA	NA	NA	K13993//HSP20 family protein	gi|460402426|ref|XP_004246713.1|//PREDICTED: inactive protein RESTRICTED TEV MOVEMENT 2 [Solanum lycopersicum]
BGI_novel_G013937	1239	1365.28	3141.13	1.22612	5.58063e-164	Up	1.13034e-164	NA	GO:0005840//ribosome	NA	GO:0042254//ribosome biogenesis	K02936//large subunit ribosomal protein L7Ae	NP_001275305.1//60S ribosomal protein L7A-like protein [Solanum tuberosum]
101261524	2683	762.11	3.64	-7.68588	7.0905e-164	Down	1.43691e-164	LOC101261524	NA	GO:0004553//hydrolase activity, hydrolyzing O-glycosyl compounds	GO:0005975//carbohydrate metabolic process	K01214//isoamylase [EC:3.2.1.68]	gi|460389836|ref|XP_004240554.1|//PREDICTED: isoamylase 3, chloroplastic [Solanum lycopersicum]
101254308	2005	336.35	1433.78	2.11582	9.58223e-164	Up	1.94287e-164	LOC101254308	NA	NA	NA	K20291//conserved oligomeric Golgi complex subunit 4	gi|723711511|ref|XP_004242426.2|//PREDICTED: pentatricopeptide repeat-containing protein At3g25210, mitochondrial [Solanum lycopersicum]
BGI_novel_G020666	744	333	1426.73	2.12315	1.17644e-163	Up	2.38903e-164	NA	NA	NA	NA	K12741//heterogeneous nuclear ribonucleoprotein A1/A3;K14651//transcription initiation factor TFIID subunit 15	XP_015088372.1//PREDICTED: acanthoscurrin-1-like [Solanum pennellii]
101259895	1180	368.5	1495.44	2.04487	1.68885e-163	Up	3.43313e-164	LOC101259895	NA	NA	NA	K09529//DnaJ homolog subfamily C member 9	gi|723738155|ref|XP_010312076.1|//PREDICTED: chaperone protein dnaJ 6-like [Solanum lycopersicum]
BGI_novel_G014482	1577	694.36	12.43	-5.77975	1.82168e-163	Down	3.70505e-164	NA	GO:0016021//integral component of membrane	GO:0019706//protein-cysteine S-palmitoyltransferase activity	NA	K16675//palmitoyltransferase ZDHHC9/14/18 [EC:2.3.1.225]	XP_004241453.1//PREDICTED: probable protein S-acyltransferase 7 [Solanum lycopersicum]
BGI_novel_G019336	3533	1968.37	601.31	-1.68679	4.76008e-163	Down	9.69134e-164	NA	GO:0005623//cell;GO:0016021//integral component of membrane	NA	GO:0006875//cellular metal ion homeostasis	K17800//LETM1 and EF-hand domain-containing protein 1, mitochondrial	XP_004246479.1//PREDICTED: uncharacterized protein LOC101244408 isoform X1 [Solanum lycopersicum]
BGI_novel_G020998	1691	3436.95	1506.65	-1.16575	6.78648e-163	Down	1.38312e-163	NA	NA	GO:0005524//ATP binding	NA	K08900//mitochondrial chaperone BCS1	XP_004248243.1//PREDICTED: AAA-ATPase At3g50940-like [Solanum lycopersicum]
101245711	858	2446.25	879.44	-1.45188	7.3297e-163	Down	1.49537e-163	LOC101245711	NA	NA	NA	K13448//calcium-binding protein CML	gi|460371934|ref|XP_004231789.1|//PREDICTED: putative calcium-binding protein CML19 [Solanum lycopersicum]
101264685	2056	510.82	1756.1	1.80552	1.22691e-162	Up	2.50695e-163	LOC101264685	NA	GO:0003779//actin binding	NA	K12176//COP9 signalosome complex subunit 2;K11674//microspherule protein 1	gi|460407367|ref|XP_004249124.1|//PREDICTED: uncharacterized protein LOC101264685 [Solanum lycopersicum]
BGI_novel_G006147	2326	1156.09	2815.12	1.30798	1.41514e-162	Up	2.89304e-163	NA	NA	GO:0005524//ATP binding;GO:0019205//nucleobase-containing compound kinase activity	GO:0006139//nucleobase-containing compound metabolic process	K00939//adenylate kinase [EC:2.7.4.3]	XP_004231791.1//PREDICTED: probable adenylate kinase 7, mitochondrial [Solanum lycopersicum]
101250985	1343	472	1685.21	1.8601	1.5074e-162	Up	3.08323e-163	LOC101250985	NA	NA	NA	K09419//heat shock transcription factor, other eukaryote	gi|460384899|ref|XP_004238144.1|//PREDICTED: heat stress transcription factor B-4 [Solanum lycopersicum]
BGI_novel_G004982	2929	2190.42	4312.8	1.00145	2.23686e-162	Up	4.57995e-163	NA	GO:0005634//nucleus;GO:0042555//MCM complex	GO:0003677//DNA binding;GO:0005524//ATP binding;GO:0003678//DNA helicase activity	GO:0006270//DNA replication initiation	K02542//DNA replication licensing factor MCM6 [EC:3.6.4.12]	XP_004232601.1//PREDICTED: DNA replication licensing factor MCM6 [Solanum lycopersicum]
BGI_novel_G014288	4828	1515.86	3352.29	1.16904	2.75079e-162	Up	5.6351e-163	NA	NA	GO:0046872//metal ion binding	NA	K02184//formin 2	XP_010322582.1//PREDICTED: uncharacterized protein LOC101261830 isoform X2 [Solanum lycopersicum]
BGI_novel_G015522	2001	1040.08	145.85	-2.8101	5.14261e-162	Down	1.0551e-162	NA	NA	GO:0005524//ATP binding;GO:0004672//protein kinase activity	NA	K08869//aarF domain-containing kinase	XP_009614579.1//PREDICTED: uncharacterized protein LOC104107467 isoform X1 [Nicotiana tomentosiformis]
BGI_novel_G009084	2445	1183.49	206.65	-2.49375	5.24693e-162	Down	1.07705e-162	NA	NA	NA	NA	K04422//mitogen-activated protein kinase kinase kinase 13 [EC:2.7.11.25]	XP_004236976.1//PREDICTED: uncharacterized protein LOC101252579 [Solanum lycopersicum]
BGI_novel_G010850	1418	1224	2915	1.27593	5.43674e-162	Up	1.11659e-162	NA	NA	GO:0003677//DNA binding	NA	K15601//lysine-specific demethylase 3 [EC:1.14.11.-]	XP_004238289.1//PREDICTED: zinc-finger homeodomain protein 5 [Solanum lycopersicum]
101262675	1998	925.97	2449.47	1.42747	1.16404e-161	Up	2.39313e-162	LOC101262675	NA	NA	NA	K14494//DELLA protein	gi|460372215|ref|XP_004231927.1|//PREDICTED: protein SHORT-ROOT [Solanum lycopersicum]
BGI_novel_G020052	3294	708.31	2093.21	1.5873	1.3014e-161	Up	2.67688e-162	NA	NA	NA	NA	K21843//tetratricopeptide repeat protein 7	XP_016565564.1//PREDICTED: uncharacterized protein LOC107863890 [Capsicum annuum]
101261781	2310	1886.73	561.06	-1.72563	2.12976e-161	Down	4.38523e-162	LOC101261781	NA	NA	NA	K14539//large subunit GTPase 1 [EC:3.6.1.-]	gi|723746238|ref|XP_010313487.1|//PREDICTED: large subunit GTPase 1 homolog [Solanum lycopersicum]
101263673	1313	1482.64	348.73	-2.06395	2.30286e-161	Down	4.74406e-162	LOC101263673	NA	NA	NA	NA	gi|460376694|ref|XP_004234132.1|//PREDICTED: uncharacterized protein LOC101263673 [Solanum lycopersicum]
BGI_novel_G024233	3926	2583.1	968.33	-1.3915	2.5289e-161	Down	5.21237e-162	NA	NA	GO:0003994//aconitate hydratase activity;GO:0051539//4 iron, 4 sulfur cluster binding	GO:0008152//metabolic process	K01681//aconitate hydratase [EC:4.2.1.3]	XP_006351962.1//PREDICTED: aconitate hydratase, cytoplasmic [Solanum tuberosum]
BGI_novel_G006059	974	1318.89	269.74	-2.26565	2.72559e-161	Down	5.62063e-162	NA	NA	GO:0046872//metal ion binding;GO:0008171//O-methyltransferase activity;GO:0042409//caffeoyl-CoA O-methyltransferase activity	GO:0009809//lignin biosynthetic process	K00588//caffeoyl-CoA O-methyltransferase [EC:2.1.1.104]	XP_004231856.1//PREDICTED: caffeoyl-CoA O-methyltransferase [Solanum lycopersicum]
BGI_novel_G023868	1549	1530.57	3366.57	1.16124	2.9418e-161	Up	6.06958e-162	NA	NA	GO:0008270//zinc ion binding;GO:0043565//sequence-specific DNA binding;GO:0003700//DNA binding transcription factor activity	NA	K17895//GATA-binding protein 3;K21630//GATA-type zinc finger protein 1	XP_004251141.1//PREDICTED: GATA transcription factor 11-like isoform X2 [Solanum lycopersicum]
BGI_novel_G001255	3836	1190.5	0	-11.1933	4.90866e-161	Down	1.01431e-161	NA	NA	GO:0003723//RNA binding	GO:0006396//RNA processing	K13096//splicing factor 4	XP_004229607.1//PREDICTED: SURP and G-patch domain-containing protein 1-like protein [Solanum lycopersicum]
101246293	1239	814.08	2263.89	1.49959	7.84053e-161	Up	1.62178e-161	LOC101246293	NA	GO:0008270//zinc ion binding	NA	K19042//E3 ubiquitin-protein ligase BOI and related proteins [EC:2.3.2.27]	gi|460371510|ref|XP_004231579.1|//PREDICTED: probable BOI-related E3 ubiquitin-protein ligase 3 [Solanum lycopersicum]
BGI_novel_G004781	3166	1885.31	562.36	-1.7212	1.05082e-160	Down	2.17469e-161	NA	GO:0016021//integral component of membrane;GO:0005886//plasma membrane	GO:0004674//protein serine/threonine kinase activity;GO:0005524//ATP binding	GO:0006468//protein phosphorylation	K04733//interleukin-1 receptor-associated kinase 4 [EC:2.7.11.1]	XP_010316618.1//PREDICTED: putative receptor-like protein kinase At4g00960 isoform X1 [Solanum lycopersicum]
BGI_novel_G011873	2060	1490.23	3303.06	1.1723	1.2393e-160	Up	2.56604e-161	NA	GO:0005737//cytoplasm	GO:0005524//ATP binding;GO:0051082//unfolded protein binding	GO:0006457//protein folding	K09497//T-complex protein 1 subunit epsilon	XP_016568717.1//PREDICTED: T-complex protein 1 subunit epsilon [Capsicum annuum]
BGI_novel_G001122	1653	359.57	1463.7	2.04931	1.64307e-160	Up	3.40552e-161	NA	NA	NA	NA	K11592//endoribonuclease Dicer [EC:3.1.26.-];K10532//heparan-alpha-glucosaminide N-acetyltransferase [EC:2.3.1.78]	XP_004229496.1//PREDICTED: crescerin-1 [Solanum lycopersicum]
101253228	1545	1184.25	0	-11.1857	2.11206e-160	Down	4.38422e-161	LOC101253228	NA	NA	NA	K00703//starch synthase [EC:2.4.1.21];K13993//HSP20 family protein	gi|460368432|ref|XP_004230071.1|//PREDICTED: protein RESTRICTED TEV MOVEMENT 2 [Solanum lycopersicum]
101055609	2316	1183.22	0	-11.1845	2.68749e-160	Down	5.58151e-161	LOC101055609	GO:0016020//membrane;GO:0048046//apoplast;GO:0009941//chloroplast envelope;GO:0010319//stromule;GO:0042644//chloroplast nucleoid	GO:0020037//heme binding;GO:0003677//DNA binding;GO:0005507//copper ion binding;GO:0051539//4 iron, 4 sulfur cluster binding;GO:0050311//sulfite reductase (ferredoxin) activity;GO:0016002//sulfite reductase activity	GO:0045892//negative regulation of transcription, DNA-templated;GO:0006323//DNA packaging;GO:0006275//regulation of DNA replication;GO:0019419//sulfate reduction;GO:0019424//sulfide oxidation, using siroheme sulfite reductase	K00392//sulfite reductase (ferredoxin) [EC:1.8.7.1]	gi|525314310|ref|NP_001266248.1|//sulfite reductase [Solanum lycopersicum]
101254198	1996	1182.77	0	-11.1839	2.98503e-160	Down	6.20258e-161	LOC101254198	NA	NA	NA	K14500//BR-signaling kinase [EC:2.7.11.1]	gi|460385443|ref|XP_004238413.1|//PREDICTED: probable serine/threonine-protein kinase At4g35230 [Solanum lycopersicum]
BGI_novel_G003740	1865	1915.32	3911.03	1.054	3.44584e-160	Up	7.1637e-161	NA	NA	GO:0003700//DNA binding transcription factor activity	GO:0006351//transcription, DNA-templated;GO:0009742//brassinosteroid mediated signaling pathway	K14503//brassinosteroid resistant 1/2	XP_004233505.1//PREDICTED: BES1/BZR1 homolog protein 2-like [Solanum lycopersicum]
BGI_novel_G008925	1160	771.2	48.79	-3.95841	3.93977e-160	Down	8.19882e-161	NA	GO:0043234//protein complex;GO:0009534//chloroplast thylakoid;GO:0009570//chloroplast stroma	GO:0043495//protein membrane anchor;GO:0048037//cofactor binding	GO:0070455//positive regulation of heme biosynthetic process;GO:0009791//post-embryonic development;GO:0033014//tetrapyrrole biosynthetic process;GO:0009767//photosynthetic electron transport chain	NA	XP_004235509.1//PREDICTED: glutamyl-tRNA reductase-binding protein, chloroplastic [Solanum lycopersicum]
BGI_novel_G015343	796	799.19	2234.91	1.50764	4.81173e-160	Up	1.00184e-160	NA	NA	NA	NA	NA	XP_004242715.1//PREDICTED: uncharacterized protein LOC101253390 [Solanum lycopersicum]
BGI_novel_G014373	1623	705.15	26.1	-4.73178	4.99161e-160	Down	1.03982e-160	NA	GO:0016021//integral component of membrane	GO:0016874//ligase activity	NA	K16284//E3 ubiquitin-protein ligase SIS3 [EC:2.3.2.27]	XP_009618105.1//PREDICTED: E3 ubiquitin-protein ligase SIS3-like isoform X1 [Nicotiana tomentosiformis]
BGI_novel_G013830	919	613.96	1923.04	1.67121	6.883e-160	Up	1.43455e-160	NA	NA	GO:0003993//acid phosphatase activity	NA	K20728//vegetative storage protein 2	XP_004241953.1//PREDICTED: acid phosphatase 1 [Solanum lycopersicum]
544309	1642	1178.17	0	-11.1783	8.74731e-160	Down	1.82494e-160	LOC544309	NA	NA	NA	K03453//bile acid:Na+ symporter, BASS family	gi|922959993|ref|NP_001234028.2|//anion:sodium symporter [Solanum lycopersicum]
BGI_novel_G000285	2246	696.97	2062.12	1.58899	1.74958e-159	Up	3.65929e-160	NA	GO:0016021//integral component of membrane	GO:0005337//nucleoside transmembrane transporter activity	NA	K15014//solute carrier family 29 (equilibrative nucleoside transporter), member 1/2/3	XP_004228548.1//PREDICTED: equilibrative nucleotide transporter 1 [Solanum lycopersicum]
101253931	2984	1838.26	3796.42	1.07033	1.86407e-159	Up	3.90071e-160	LOC101253931	NA	NA	NA	K20478//golgin subfamily B member 1	gi|460366578|ref|XP_004229158.1|//PREDICTED: midasin [Solanum lycopersicum]
101257470	2168	776.9	51.69	-3.88574	2.02873e-159	Down	4.24738e-160	ST4.1	GO:0005887//integral component of plasma membrane	GO:0008271//secondary active sulfate transmembrane transporter activity	GO:1902358//sulfate transmembrane transport	K18059//sulfate transporter 4	gi|567757479|ref|NP_001274722.1|//probable sulfate transporter 4.2-like [Solanum lycopersicum]
BGI_novel_G003176	3458	536.33	1783.48	1.75754	3.561e-159	Up	7.45911e-160	NA	GO:0005634//nucleus;GO:0042555//MCM complex	GO:0003677//DNA binding;GO:0005524//ATP binding;GO:0003678//DNA helicase activity	GO:0006270//DNA replication initiation	K02212//DNA replication licensing factor MCM4 [EC:3.6.4.12]	XP_004230864.1//PREDICTED: DNA replication licensing factor MCM4 [Solanum lycopersicum]
101259775	3681	616.63	1922.04	1.66419	7.25932e-159	Up	1.52591e-159	LOC101259775	NA	GO:0003677//DNA binding	NA	K09420//transcriptional activator Myb	gi|460399473|ref|XP_004245265.1|//PREDICTED: myb-related protein 3R-1-like [Solanum lycopersicum]
101248620	2272	2830.46	1133.66	-1.29602	1.5469e-158	Down	3.25808e-159	LOC101248620	NA	NA	NA	K17087//transmembrane 9 superfamily member 3	gi|460369246|ref|XP_004230474.1|//PREDICTED: transmembrane 9 superfamily member 3-like [Solanum lycopersicum]
101248536	2377	338.75	1413.5	2.08501	1.66405e-158	Up	3.50831e-159	LOC101248536	NA	NA	NA	K09285//AP2-like factor, ANT lineage	gi|723741666|ref|XP_004250153.2|//PREDICTED: AP2-like ethylene-responsive transcription factor AIL6 [Solanum lycopersicum]
101266879	790	875.21	2347.96	1.44774	2.56456e-158	Up	5.40955e-159	LOC101266879	NA	NA	NA	NA	gi|460407218|ref|XP_004249051.1|//PREDICTED: non-specific lipid-transfer protein 2-like [Solanum lycopersicum]
BGI_novel_G016088	1112	71.27	811.35	3.53299	3.70681e-158	Up	7.82283e-159	NA	NA	NA	NA	K06995//uncharacterized protein	XP_004243526.1//PREDICTED: uncharacterized protein LOC101246360 [Solanum lycopersicum]
BGI_novel_G009731	1785	1041	152.99	-2.74243	3.75059e-158	Down	7.91915e-159	NA	NA	GO:0004351//glutamate decarboxylase activity;GO:0030170//pyridoxal phosphate binding	GO:0006536//glutamate metabolic process	K01580//glutamate decarboxylase [EC:4.1.1.15]	NP_001233827.1//glutamate decarboxylase isoform3 [Solanum lycopersicum]
BGI_novel_G010817	2618	186.46	1093.92	2.5766	5.43094e-158	Up	1.14785e-158	NA	NA	NA	NA	NA	XP_004238598.1//PREDICTED: uncharacterized protein LOC101266938 isoform X2 [Solanum lycopersicum]
BGI_novel_G018009	1796	107.27	905.42	3.10137	5.93967e-158	Up	1.256e-158	NA	NA	NA	NA	NA	XP_004245417.1//PREDICTED: DDT domain-containing protein DDR4 [Solanum lycopersicum]
101260808	1398	3262.02	1415.72	-1.1802	9.98115e-158	Down	2.11165e-158	LOC101260808	NA	NA	NA	K10661//E3 ubiquitin-protein ligase MARCH6 [EC:2.3.2.27]	gi|460380488|ref|XP_004235988.1|//PREDICTED: uncharacterized protein LOC101260808 [Solanum lycopersicum]
101256607	831	212.65	1150.26	2.45944	1.2189e-157	Up	2.5813e-158	LOC101256607	NA	NA	NA	NA	gi|723717729|ref|XP_010324207.1|//PREDICTED: uncharacterized protein LOC101256607 [Solanum lycopersicum]
101257924	4211	883.45	92.04	-3.23878	1.28145e-157	Down	2.71512e-158	LOC101257924	NA	NA	NA	K04733//interleukin-1 receptor-associated kinase 4 [EC:2.7.11.1];K04730//interleukin-1 receptor-associated kinase 1 [EC:2.7.11.1];K13420//LRR receptor-like serine/threonine-protein kinase FLS2 [EC:2.7.11.1]	gi|460374718|ref|XP_004233157.1|//PREDICTED: probable LRR receptor-like serine/threonine-protein kinase At4g20940 [Solanum lycopersicum]
544125	1575	577.78	1847.07	1.70068	1.89368e-157	Up	4.01627e-158	cel7	NA	GO:0008810//cellulase activity	GO:0030245//cellulose catabolic process	K01179//endoglucanase [EC:3.2.1.4]	gi|350538027|ref|NP_001234323.1|//endo-1,4-beta-D-glucanase precursor [Solanum lycopersicum]
101266882	1339	1078.67	170.04	-2.64127	1.92864e-157	Down	4.09244e-158	LOC101266882	NA	NA	NA	K13448//calcium-binding protein CML	gi|460407556|ref|XP_004249218.1|//PREDICTED: probable calcium-binding protein CML49 [Solanum lycopersicum]
101252392	1653	827.89	72.59	-3.48756	3.98318e-157	Down	8.46038e-158	LOC101252392	NA	NA	NA	NA	gi|460387130|ref|XP_004239242.1|//PREDICTED: uncharacterized protein LOC101252392 [Solanum lycopersicum]
101248209	530	337.39	1404.19	2.08128	4.06994e-157	Up	8.64892e-158	LOC101248209	GO:0009506//plasmodesma;GO:0009579//thylakoid;GO:0005774//vacuolar membrane;GO:0005730//nucleolus;GO:0005829//cytosol;GO:0005886//plasma membrane;GO:0000786//nucleosome;GO:0009507//chloroplast	GO:0003677//DNA binding;GO:0046982//protein heterodimerization activity	GO:0006334//nucleosome assembly	K11254//histone H4	gi|195617694|gb|ACG30677.1|//histone H4 [Zea mays]
BGI_novel_G007306	1112	666.06	12.49	-5.71277	7.30165e-157	Down	1.55472e-157	NA	GO:0048046//apoplast;GO:0005618//cell wall	GO:0016762//xyloglucan:xyloglucosyl transferase activity;GO:0004553//hydrolase activity, hydrolyzing O-glycosyl compounds	GO:0010411//xyloglucan metabolic process;GO:0042546//cell wall biogenesis;GO:0071555//cell wall organization	K14504//xyloglucan:xyloglucosyl transferase TCH4 [EC:2.4.1.207]	XP_004235157.1//PREDICTED: probable xyloglucan endotransglucosylase/hydrolase protein 23 [Solanum lycopersicum]
BGI_novel_G017000	3202	2101.06	698.62	-1.5645	2.79891e-156	Down	5.97137e-157	NA	NA	GO:0004722//protein serine/threonine phosphatase activity	NA	K17505//protein phosphatase 1K [EC:3.1.3.16];K17506//protein phosphatase 1L [EC:3.1.3.16]	XP_004243998.1//PREDICTED: probable protein phosphatase 2C 6 [Solanum lycopersicum]
101264318	855	1140.11	0	-11.1309	6.75597e-156	Down	1.44348e-156	LOC101264318	NA	NA	GO:0048868//pollen tube development;GO:0009737//response to abscisic acid	K20304//trafficking protein particle complex subunit 6	gi|460384322|ref|XP_004237861.1|//PREDICTED: trafficking protein particle complex subunit 6B [Solanum lycopersicum]
101263989	1842	426.07	1566.68	1.90258	7.33805e-156	Up	1.56862e-156	LOC101263989	NA	NA	NA	NA	gi|460415480|ref|XP_004253086.1|//PREDICTED: growth-regulating factor 4-like isoform X1 [Solanum lycopersicum]
BGI_novel_G009642	1701	204.09	1123.28	2.48447	9.33464e-156	Up	1.9964e-156	NA	NA	NA	NA	NA	XP_004236574.1//PREDICTED: protein IQ-DOMAIN 14 [Solanum lycopersicum]
BGI_novel_G002746	1819	1922.83	3887	1.03946	1.1212e-155	Up	2.3991e-156	NA	GO:0043231//intracellular membrane-bounded organelle	GO:0080043//quercetin 3-O-glucosyltransferase activity;GO:0080044//quercetin 7-O-glucosyltransferase activity;GO:0016758//transferase activity, transferring hexosyl groups	GO:0008152//metabolic process	K21374//7-deoxyloganetin glucosyltransferase [EC:2.4.1.324]	XP_004230580.1//PREDICTED: 7-deoxyloganetin glucosyltransferase-like [Solanum lycopersicum]
101250924	2316	1366.19	3085.16	1.19922	1.32146e-155	Up	2.83036e-156	LOC101250924	NA	NA	NA	K14638//solute carrier family 15 (peptide/histidine transporter), member 3/4	gi|460367286|ref|XP_004229506.1|//PREDICTED: protein NRT1/ PTR FAMILY 7.3-like [Solanum lycopersicum]
BGI_novel_G023791	2194	190.88	1093.2	2.54185	1.51308e-155	Up	3.24238e-156	NA	NA	NA	NA	K17550//protein phosphatase 1 regulatory subunit 7	XP_004251076.1//PREDICTED: dynein regulatory complex subunit 3 [Solanum lycopersicum]
BGI_novel_G020838	1684	3941.15	1884.56	-1.04036	1.84573e-155	Down	3.95713e-156	NA	GO:0005886//plasma membrane	GO:0004674//protein serine/threonine kinase activity;GO:0005524//ATP binding	GO:0033160//positive regulation of protein import into nucleus, translocation;GO:0050826//response to freezing;GO:0002237//response to molecule of bacterial origin;GO:0009625//response to insect;GO:0046777//protein autophosphorylation	K04733//interleukin-1 receptor-associated kinase 4 [EC:2.7.11.1]	XP_004248347.1//PREDICTED: putative serine/threonine-protein kinase [Solanum lycopersicum]
543605	1764	3123.83	1335.84	-1.20154	1.98243e-155	Down	4.2523e-156	LOC543605	NA	NA	NA	K00451//homogentisate 1,2-dioxygenase [EC:1.13.11.5]	gi|957552909|ref|NP_001304278.1|//homogentisate 1,2-dioxygenase [Solanum lycopersicum]
BGI_novel_G005356	2523	1131.58	0	-11.1201	5.08507e-155	Down	1.09181e-155	NA	GO:0016021//integral component of membrane	NA	NA	K08150//MFS transporter, SP family, solute carrier family 2 (myo-inositol transporter), member 13	XP_019173072.1//PREDICTED: plastidic glucose transporter 4 isoform X2 [Ipomoea nil]
BGI_novel_G010476	2587	192.92	1094.96	2.52884	6.55534e-155	Up	1.40955e-155	NA	NA	NA	NA	NA	XP_004238003.1//PREDICTED: VIN3-like protein 2 isoform X1 [Solanum lycopersicum]
BGI_novel_G011434	2497	1647.64	3490.06	1.10688	7.53621e-155	Up	1.62125e-155	NA	GO:0016021//integral component of membrane;GO:0005886//plasma membrane	GO:0005524//ATP binding;GO:0042626//ATPase activity, coupled to transmembrane movement of substances;GO:0016887//ATPase activity	NA	K21396//ATP-binding cassette, subfamily G (WHITE), eye pigment precursor transporter	XP_004238860.1//PREDICTED: ABC transporter G family member 7 isoform X2 [Solanum lycopersicum]
101248737	1444	135.28	961.65	2.8536	8.49126e-155	Up	1.8276e-155	LOC101248737	NA	NA	NA	K12191//charged multivesicular body protein 2A	gi|723674680|ref|XP_010316748.1|//PREDICTED: uncharacterized protein LOC101248737 isoform X1 [Solanum lycopersicum]
BGI_novel_G017944	916	5	676.21	7.10343	1.22264e-154	Up	2.63282e-155	NA	GO:0005634//nucleus	GO:0000977//RNA polymerase II regulatory region sequence-specific DNA binding;GO:0003700//DNA binding transcription factor activity;GO:0046983//protein dimerization activity	GO:0045944//positive regulation of transcription from RNA polymerase II promoter;GO:0006351//transcription, DNA-templated	K09264//MADS-box transcription factor, plant	XP_004245202.1//PREDICTED: floral homeotic protein FBP1 [Solanum lycopersicum]
101259911	2175	1103.26	186.31	-2.54196	2.09426e-154	Down	4.52071e-155	LOC101259911	NA	NA	NA	K04733//interleukin-1 receptor-associated kinase 4 [EC:2.7.11.1]	gi|723674032|ref|XP_010316619.1|//PREDICTED: putative receptor-like protein kinase At4g00960 isoform X1 [Solanum lycopersicum]
BGI_novel_G019170	3227	740.14	2104.74	1.5318	2.32596e-154	Up	5.0233e-155	NA	NA	NA	NA	K00232//acyl-CoA oxidase [EC:1.3.3.6];K08343//ubiquitin-like-conjugating enzyme ATG3	XP_004246599.1//PREDICTED: uncharacterized protein LOC101254125 [Solanum lycopersicum]
BGI_novel_G008795	1836	1059.47	2612.72	1.32624	3.02588e-154	Up	6.53808e-155	NA	GO:0005634//nucleus	NA	NA	K10752//histone-binding protein RBBP4	XP_004235600.1//PREDICTED: WD-40 repeat-containing protein MSI4 [Solanum lycopersicum]
BGI_novel_G000181	2165	450.87	1603.23	1.85423	4.48858e-154	Up	9.70797e-155	NA	NA	NA	GO:0006457//protein folding	NA	XP_004228638.1//PREDICTED: IRK-interacting protein [Solanum lycopersicum]
544257	1530	1116.75	0	-11.1011	1.71365e-153	Down	3.71888e-154	NRAMP3	GO:0016021//integral component of membrane	GO:0005215//transporter activity	GO:0006810//transport	K12347	gi|350537125|ref|NP_001233770.1|//metal transporter [Solanum lycopersicum]
101245334	2090	827.34	2241	1.46162	2.46942e-153	Up	5.3616e-154	LOC101245334	NA	NA	NA	K14638//solute carrier family 15 (peptide/histidine transporter), member 3/4	gi|723750990|ref|XP_004252349.2|//PREDICTED: protein NRT1/ PTR FAMILY 1.2 [Solanum lycopersicum]
BGI_novel_G006833	3141	1113.95	0	-11.0974	3.33776e-153	Down	7.25044e-154	NA	GO:0016021//integral component of membrane	NA	NA	K05740//diaphanous 1;K02184//formin 2	XP_004234650.1//PREDICTED: formin-like protein 6 [Solanum lycopersicum]
101257697	1783	180.04	1058.57	2.57976	3.78765e-153	Up	8.23963e-154	LOC101257697	NA	NA	NA	K01728//pectate lyase [EC:4.2.2.2]	gi|460402218|ref|XP_004246611.1|//PREDICTED: probable pectate lyase 12 [Solanum lycopersicum]
BGI_novel_G020510	1220	548.28	1772.39	1.71674	3.81424e-153	Up	8.30147e-154	NA	GO:0005634//nucleus	NA	GO:0006355//regulation of transcription, DNA-templated;GO:0009734//auxin-activated signaling pathway;GO:0006351//transcription, DNA-templated	K14484//auxin-responsive protein IAA	XP_010326736.1//PREDICTED: IAA13 isoform X1 [Solanum lycopersicum]
101260969	887	3088.69	1323.57	-1.19853	4.23697e-153	Down	9.23485e-154	LOC101260969	NA	NA	NA	NA	gi|723731517|ref|XP_010326606.1|//PREDICTED: CASP-like protein 1E1 [Solanum lycopersicum]
BGI_novel_G002268	3031	1665.51	464.98	-1.81669	4.2602e-153	Down	9.28995e-154	NA	NA	GO:0005516//calmodulin binding	GO:0006950//response to stress	K21989//calcium permeable stress-gated cation channel	XP_004230284.1//PREDICTED: calmodulin-binding protein 60 C [Solanum lycopersicum]
101245664	1296	1507.43	383.92	-1.94918	2.30964e-152	Down	5.05101e-153	LOC101245664	NA	NA	NA	K03921//acyl-[acyl-carrier-protein] desaturase [EC:1.14.19.2 1.14.19.11 1.14.19.26]	gi|460392922|ref|XP_004242061.1|//PREDICTED: acyl-[acyl-carrier-protein] desaturase 6, chloroplastic-like [Solanum lycopersicum]
BGI_novel_G023814	1434	1719.01	497	-1.76623	5.26884e-152	Down	1.15281e-152	NA	NA	GO:0004842//ubiquitin-protein transferase activity;GO:0016874//ligase activity	NA	K10260//F-box and WD-40 domain protein 7;K08332//vacuolar protein 8	XP_004251097.1//PREDICTED: E3 ubiquitin-protein ligase PUB23-like [Solanum lycopersicum]
BGI_novel_G002284	2267	1514.32	3276.67	1.13759	5.73532e-152	Up	1.25608e-152	NA	GO:0005623//cell	GO:0009055//electron transfer activity;GO:0050660//flavin adenine dinucleotide binding;GO:0016668//oxidoreductase activity, acting on a sulfur group of donors, NAD(P) as acceptor	GO:0045454//cell redox homeostasis	K00382//dihydrolipoamide dehydrogenase [EC:1.8.1.4]	XP_004230295.1//PREDICTED: dihydrolipoyl dehydrogenase 2, chloroplastic-like [Solanum lycopersicum]
101244228	1410	357.6	1417.32	2.01078	9.5578e-152	Up	2.09623e-152	LOC101244228	NA	NA	NA	NA	gi|831360260|ref|NP_001296742.1|//uncharacterized protein LOC101244228 [Solanum lycopersicum]
BGI_novel_G009034	2655	2491.72	950.03	-1.36706	1.38076e-151	Down	3.03266e-152	NA	NA	NA	NA	NA	XP_004236975.1//PREDICTED: uncharacterized protein LOC101252276 [Solanum lycopersicum]
100736471	3610	1981.28	645.27	-1.59442	1.54944e-151	Down	3.40475e-152	LOC100736471	NA	NA	NA	K16278//E3 ubiquitin-protein ligase HOS1 [EC:2.3.2.27]	gi|723725131|ref|XP_010325501.1|//PREDICTED: E3 ubiquitin-protein ligase HOS1 [Solanum lycopersicum]
BGI_novel_G008877	1778	667.94	25.01	-4.71511	1.73924e-151	Down	3.82365e-152	NA	GO:0005634//nucleus	GO:0003677//DNA binding;GO:0003700//DNA binding transcription factor activity	GO:0006351//transcription, DNA-templated	K09286//EREBP-like factor	NP_001234462.2//JERF3 [Solanum lycopersicum]
BGI_novel_G014107	1561	45.99	713.43	3.97941	3.19008e-151	Up	7.01662e-152	NA	NA	NA	NA	K16189//phytochrome-interacting factor 4;K04733//interleukin-1 receptor-associated kinase 4 [EC:2.7.11.1];K05765//cofilin;K14638//solute carrier family 15 (peptide/histidine transporter), member 3/4	XP_004241741.1//PREDICTED: transcription factor bHLH68 isoform X1 [Solanum lycopersicum]
BGI_novel_G005488	809	202.92	1100	2.46255	4.79476e-151	Up	1.05562e-151	NA	GO:0016021//integral component of membrane	NA	NA	NA	XP_004233695.1//PREDICTED: uncharacterized protein LOC101249328 [Solanum lycopersicum]
BGI_novel_G016432	1956	3251.68	1441	-1.15008	5.99004e-151	Down	1.32003e-151	NA	GO:0016021//integral component of membrane	GO:0016705//oxidoreductase activity, acting on paired donors, with incorporation or reduction of molecular oxygen;GO:0020037//heme binding;GO:0005506//iron ion binding;GO:0004497//monooxygenase activity	NA	K07428//cytochrome P450 family 4 subfamily X [EC:1.14.14.1]	XP_016580931.1//PREDICTED: cytochrome P450 CYP72A219-like [Capsicum annuum]
BGI_novel_G014979	1982	1000.65	149.18	-2.72178	6.72588e-151	Down	1.48289e-151	NA	GO:0043231//intracellular membrane-bounded organelle	GO:0003723//RNA binding;GO:0004519//endonuclease activity	GO:0009451//RNA modification	K17964//leucine-rich PPR motif-containing protein, mitochondrial;K20291//conserved oligomeric Golgi complex subunit 4	XP_004242426.2//PREDICTED: pentatricopeptide repeat-containing protein At3g25210, mitochondrial [Solanum lycopersicum]
BGI_novel_G014315	1514	867.51	96.45	-3.14499	7.7177e-151	Down	1.70237e-151	NA	GO:0005634//nucleus	GO:0003677//DNA binding	GO:0006355//regulation of transcription, DNA-templated;GO:0006351//transcription, DNA-templated	K12862//pleiotropic regulator 1;K13126//polyadenylate-binding protein;K05941//glutathione gamma-glutamylcysteinyltransferase [EC:2.3.2.15]	XP_004241586.1//PREDICTED: NAC domain-containing protein 100-like [Solanum lycopersicum]
101254035	690	684.85	32	-4.39561	8.46078e-151	Down	1.86805e-151	LOC101254035	NA	NA	NA	NA	gi|460404704|ref|XP_004247821.1|//PREDICTED: glycine-rich cell wall structural protein 1-like [Solanum lycopersicum]
101258936	1789	1160.46	2743.91	1.26557	1.1001e-150	Up	2.43466e-151	LOC101258936	NA	NA	NA	K05609//ubiquitin carboxyl-terminal hydrolase L3 [EC:3.4.19.12]	gi|460380987|ref|XP_004236234.1|//PREDICTED: uncharacterized protein LOC101258936 [Solanum lycopersicum]
BGI_novel_G005332	1792	214.94	1124.26	2.411	1.17917e-150	Up	2.6109e-151	NA	GO:0005737//cytoplasm	GO:0003958//NADPH-hemoprotein reductase activity;GO:0050661//NADP binding;GO:0010181//FMN binding;GO:0050660//flavin adenine dinucleotide binding;GO:0016491//oxidoreductase activity	GO:0016226//iron-sulfur cluster assembly	K00327//NADPH-ferrihemoprotein reductase [EC:1.6.2.4]	XP_016474755.1//PREDICTED: NADPH-dependent diflavin oxidoreductase 1-like isoform X2 [Nicotiana tabacum]
BGI_novel_G004686	5981	2467.03	938.61	-1.37014	1.29798e-150	Down	2.87533e-151	NA	GO:0005680//anaphase-promoting complex	NA	GO:0048481//plant ovule development;GO:0031145//anaphase-promoting complex-dependent catabolic process;GO:0030071//regulation of mitotic metaphase/anaphase transition;GO:0009793//embryo development ending in seed dormancy	K03351//anaphase-promoting complex subunit 4	XP_004232806.1//PREDICTED: anaphase-promoting complex subunit 4 isoform X2 [Solanum lycopersicum]
101265773	797	2360.37	873.34	-1.41036	1.42458e-150	Down	3.15727e-151	LOC101265773	NA	NA	NA	K13436//pto-interacting protein 1 [EC:2.7.11.1]	gi|460368344|ref|XP_004230027.1|//PREDICTED: NAD(P)H:quinone oxidoreductase [Solanum lycopersicum]
BGI_novel_G003825	2621	247.96	1193.42	2.29096	1.57356e-150	Up	3.4891e-151	NA	NA	GO:0005524//ATP binding;GO:0004672//protein kinase activity;GO:0005509//calcium ion binding	NA	K00924//kinase [EC:2.7.1.-]	XP_016508430.1//PREDICTED: CDPK-related kinase 5-like [Nicotiana tabacum]
BGI_novel_G023991	1824	1478.65	3214.2	1.14421	1.74829e-150	Up	3.87838e-151	NA	NA	GO:0008270//zinc ion binding;GO:0003676//nucleic acid binding	NA	K09250//cellular nucleic acid-binding protein	XP_004251209.1//PREDICTED: protein AIR2 isoform X1 [Solanum lycopersicum]
BGI_novel_G010788	1128	1120.56	2681.81	1.28302	1.86807e-150	Up	4.148e-151	NA	GO:0000118//histone deacetylase complex	GO:0004407//histone deacetylase activity;GO:0003712//transcription cofactor activity	GO:0006355//regulation of transcription, DNA-templated	K19202//histone deacetylase complex subunit SAP30	XP_004238223.1//PREDICTED: uncharacterized protein LOC101249354 [Solanum lycopersicum]
101262986	2309	3204.25	1412.26	-1.15795	2.18477e-150	Down	4.85353e-151	LOC101262986	NA	NA	NA	K03495//tRNA uridine 5-carboxymethylaminomethyl modification enzyme	gi|460410905|ref|XP_004250856.1|//PREDICTED: uncharacterized protein LOC101262986 [Solanum lycopersicum]
101244162	1380	1756.69	522.63	-1.72496	2.55112e-150	Down	5.67004e-151	LOC101244162	GO:0005576//extracellular region	GO:0020037//heme binding;GO:0046872//metal ion binding;GO:0004601//peroxidase activity	GO:0006979//response to oxidative stress;GO:0098869//cellular oxidant detoxification;GO:0042744//hydrogen peroxide catabolic process;GO:0055114//oxidation-reduction process	K00430//peroxidase [EC:1.11.1.7]	gi|831360230|ref|NP_001296734.1|//peroxidase 51 precursor [Solanum lycopersicum]
101264651	1442	287.66	1273.07	2.16991	3.12492e-150	Up	6.94864e-151	LOC101264651	NA	GO:0016758//transferase activity, transferring hexosyl groups	GO:0008152//metabolic process	K13691//pathogen-inducible salicylic acid glucosyltransferase [EC:2.4.1.-]	gi|460397866|ref|XP_004244487.1|//PREDICTED: UDP-glycosyltransferase 74F2-like isoform X1 [Solanum lycopersicum]
101246051	1605	1080	2618	1.30147	3.60574e-150	Up	8.02535e-151	LOC101246051	NA	NA	NA	K02178//checkpoint serine/threonine-protein kinase [EC:2.7.11.1]	gi|460385557|ref|XP_004238470.1|//PREDICTED: mitotic spindle checkpoint protein BUBR1 [Solanum lycopersicum]
BGI_novel_G017586	2529	3198	1409.25	-1.15821	3.76161e-150	Down	8.37623e-151	NA	GO:0005737//cytoplasm	GO:0005524//ATP binding;GO:0004350//glutamate-5-semialdehyde dehydrogenase activity;GO:0004349//glutamate 5-kinase activity	GO:0055129//L-proline biosynthetic process	K12657//delta-1-pyrroline-5-carboxylate synthetase [EC:2.7.2.11 1.2.1.41]	XP_016537780.1//PREDICTED: delta-1-pyrroline-5-carboxylate synthase [Capsicum annuum]
BGI_novel_G011994	692	2273.56	822.49	-1.44285	4.22567e-150	Down	9.41844e-151	NA	GO:0005634//nucleus	GO:0043565//sequence-specific DNA binding;GO:0003700//DNA binding transcription factor activity	GO:0006351//transcription, DNA-templated	K18835//WRKY transcription factor 2	XP_015075730.1//PREDICTED: probable WRKY transcription factor 75 [Solanum pennellii]
101267590	1085	1408.16	339.97	-2.0263	8.63854e-150	Down	1.92813e-150	LOC101267590	NA	NA	NA	K08081//tropinone reductase I [EC:1.1.1.206]	gi|460379023|ref|XP_004235264.1|//PREDICTED: tropinone reductase homolog isoform X1 [Solanum lycopersicum]
101244966	1162	344.67	1382.51	2.02804	1.06475e-149	Up	2.37764e-150	RPA32a	GO:0005634//nucleus	GO:0003677//DNA binding	GO:0006281//DNA repair;GO:0006260//DNA replication;GO:0006310//DNA recombination	K10739//replication factor A2	gi|460394678|ref|XP_004242927.1|//PREDICTED: replication protein A 32 kDa subunit A-like [Solanum lycopersicum]
BGI_novel_G022709	890	926.08	2374.82	1.38264	1.73783e-149	Up	3.88613e-150	NA	GO:0005634//nucleus;GO:0000786//nucleosome	GO:0003677//DNA binding;GO:0046982//protein heterodimerization activity	NA	K11252//histone H2B	NP_001333220.1//histone H2B.3 [Solanum lycopersicum]
BGI_novel_G012582	901	1084.55	2620.1	1.29656	2.01699e-149	Up	4.51462e-150	NA	GO:0015934//large ribosomal subunit;GO:0022625//cytosolic large ribosomal subunit	GO:0003729//mRNA binding;GO:0003735//structural constituent of ribosome	GO:0006412//translation	K02872//large subunit ribosomal protein L13Ae	XP_004239861.1//PREDICTED: 60S ribosomal protein L13a-4 [Solanum lycopersicum]
BGI_novel_G019295	897	145.69	963.71	2.74973	2.18657e-149	Up	4.89648e-150	NA	GO:0005634//nucleus	GO:0003677//DNA binding	GO:0006281//DNA repair;GO:0006260//DNA replication;GO:0006310//DNA recombination	K10740//replication factor A3	XP_004246508.1//PREDICTED: replication protein A 14 kDa subunit B [Solanum lycopersicum]
BGI_novel_G006397	4157	591.77	1826.95	1.65036	2.4927e-149	Up	5.58725e-150	NA	GO:0005634//nucleus	GO:0003676//nucleic acid binding	NA	K14401//cleavage and polyadenylation specificity factor subunit 1	XP_010317467.1//PREDICTED: cleavage and polyadenylation specificity factor subunit 1 [Solanum lycopersicum]
BGI_novel_G010722	1568	874.49	102.05	-3.07513	5.83527e-149	Down	1.311e-149	NA	NA	GO:0016787//hydrolase activity	GO:0016042//lipid catabolic process	K16815//calcium-independent phospholipase A2-gamma	XP_009769117.1//PREDICTED: patatin-like protein 2 isoform X1 [Nicotiana sylvestris]
101253935	2103	632	11.45	-5.76247	5.98663e-149	Down	1.34564e-149	LOC101253935	NA	NA	NA	K13412//calcium-dependent protein kinase [EC:2.7.11.1];K04515//calcium/calmodulin-dependent protein kinase (CaM kinase) II [EC:2.7.11.17]	gi|460367451|ref|XP_004229587.1|//PREDICTED: serine/threonine-protein kinase PEPKR2 [Solanum lycopersicum]
BGI_novel_G001947	2415	87.54	818.26	3.24858	6.18787e-149	Up	1.39152e-149	NA	NA	NA	NA	NA	XP_004231230.1//PREDICTED: QWRF motif-containing protein 7-like [Solanum lycopersicum]
BGI_novel_G001245	1823	2680.47	1079.15	-1.28856	6.56769e-149	Down	1.47831e-149	NA	GO:0016020//membrane;GO:0016021//integral component of membrane;GO:0005886//plasma membrane;GO:0005769//early endosome	GO:0015095//magnesium ion transmembrane transporter activity	GO:0015693//magnesium ion transport	NA	XP_004229598.1//PREDICTED: probable magnesium transporter NIPA8 [Solanum lycopersicum]
101252227	1069	707.11	2018.34	1.5372	7.41598e-149	Up	1.6708e-149	LOC101252227	NA	NA	NA	K03013//DNA-directed RNA polymerases I, II, and III subunit RPABC1	gi|460368593|ref|XP_004230150.1|//PREDICTED: DNA-directed RNA polymerase V subunit 5A-like [Solanum lycopersicum]
101264707	2381	1467.36	372.67	-1.95322	9.1384e-149	Down	2.05982e-149	LOC101264707	NA	NA	NA	K01687//dihydroxy-acid dehydratase [EC:4.2.1.9]	gi|460413934|ref|XP_004252330.1|//PREDICTED: dihydroxy-acid dehydratase, chloroplastic-like [Solanum lycopersicum]
BGI_novel_G003965	1700	1184.95	235.01	-2.31	1.72686e-148	Down	3.896e-149	NA	NA	GO:0016758//transferase activity, transferring hexosyl groups	GO:0008152//metabolic process	NA	XP_006357138.1//PREDICTED: UDP-glycosyltransferase 90A1-like [Solanum tuberosum]
101055606	2369	1067.3	0	-11.0357	2.33633e-148	Down	5.27593e-149	LOC101055606	NA	NA	NA	K10523//speckle-type POZ protein	gi|902763355|ref|NP_001266239.2|//Hop-interacting protein THI063 [Solanum lycopersicum]
BGI_novel_G021999	2467	594.36	1825.74	1.64311	2.62734e-148	Up	5.93585e-149	NA	GO:0005783//endoplasmic reticulum;GO:0016021//integral component of membrane;GO:0005886//plasma membrane	GO:0010329//auxin efflux transmembrane transporter activity	GO:0055085//transmembrane transport;GO:0009926//auxin polar transport;GO:0009734//auxin-activated signaling pathway;GO:0010252//auxin homeostasis	K13947//auxin efflux carrier family	NP_001234204.1//auxin efflux facilitator SlPIN7 [Solanum lycopersicum]
BGI_novel_G021917	1821	2325.43	860.71	-1.40987	2.7065e-148	Down	6.11755e-149	NA	GO:0016021//integral component of membrane	GO:0016757//transferase activity, transferring glycosyl groups	NA	K18134//protein O-GlcNAc transferase [EC:2.4.1.255]	XP_004249254.1//PREDICTED: EGF domain-specific O-linked N-acetylglucosamine transferase [Solanum lycopersicum]
101261631	2530	660.53	27.18	-4.57897	3.78617e-148	Down	8.5619e-149	LOC101261631	NA	NA	NA	K04733//interleukin-1 receptor-associated kinase 4 [EC:2.7.11.1];K13199//plasminogen activator inhibitor 1 RNA-binding protein;K12663//Delta(3,5)-Delta(2,4)-dienoyl-CoA isomerase [EC:5.3.3.-]	gi|460393878|ref|XP_004242535.1|//PREDICTED: subtilisin-like protease SDD1 [Solanum lycopersicum]
BGI_novel_G007484	2000	355.34	1395.12	1.99715	4.27381e-148	Up	9.66911e-149	NA	NA	GO:0097027//ubiquitin-protein transferase activator activity;GO:0010997//anaphase-promoting complex binding	GO:1904668//positive regulation of ubiquitin protein ligase activity;GO:0051301//cell division	K03363//cell division cycle 20, cofactor of APC complex	NP_001307226.1//cell division control 20-1 [Solanum lycopersicum]
BGI_novel_G022095	1070	1535.01	3277.58	1.11842	5.85664e-148	Up	1.32563e-148	NA	NA	NA	NA	K15455//diphthamide biosynthesis protein 3	XP_004249401.2//PREDICTED: uncharacterized protein LOC101246776 [Solanum lycopersicum]
BGI_novel_G004405	3644	958.89	137.3	-2.78	7.02672e-148	Down	1.59121e-148	NA	GO:0016021//integral component of membrane	GO:0004674//protein serine/threonine kinase activity;GO:0005524//ATP binding	NA	K04733//interleukin-1 receptor-associated kinase 4 [EC:2.7.11.1]	XP_004233025.1//PREDICTED: probable LRR receptor-like serine/threonine-protein kinase At1g07650 [Solanum lycopersicum]
101254220	2766	1697.4	3508.84	1.0717	8.09302e-148	Up	1.83352e-148	LOC101254220	NA	NA	NA	NA	gi|460395969|ref|XP_004243552.1|//PREDICTED: uncharacterized protein LOC101254220 [Solanum lycopersicum]
544069	651	3337.03	1513.45	-1.11669	8.68548e-148	Down	1.96866e-148	PR-P2	GO:0005618//cell wall;GO:0005576//extracellular region	NA	GO:0050832//defense response to fungus;GO:0042742//defense response to bacterium	NA	gi|350538353|ref|NP_001234083.1|//pathogenesis-related protein P2 precursor [Solanum lycopersicum]
BGI_novel_G003701	1809	1319.95	301.2	-2.10766	1.03621e-147	Down	2.35086e-148	NA	NA	GO:0005524//ATP binding	NA	K08900//mitochondrial chaperone BCS1	XP_004233533.1//PREDICTED: protein HYPER-SENSITIVITY-RELATED 4-like [Solanum lycopersicum]
BGI_novel_G004844	2182	228.65	1140.13	2.34202	1.08746e-147	Up	2.46825e-148	NA	NA	GO:0005507//copper ion binding;GO:0016491//oxidoreductase activity	NA	K19791//iron transport multicopper oxidase	XP_019168804.1//PREDICTED: L-ascorbate oxidase homolog [Ipomoea nil]
BGI_novel_G008386	1609	553.54	1752.03	1.6863	1.10959e-147	Up	2.51966e-148	NA	NA	GO:0035091//phosphatidylinositol binding	NA	K19600//tubby-related protein 1	XP_010318693.1//PREDICTED: tubby-like protein 8 [Solanum lycopersicum]
101246403	1483	3946.24	1932.27	-1.00615	1.99612e-147	Down	4.54116e-148	LOC101246403	NA	NA	NA	K03696//ATP-dependent Clp protease ATP-binding subunit ClpC	gi|460376748|ref|XP_004234159.1|//PREDICTED: clp protease-related protein At4g12060, chloroplastic-like [Solanum lycopersicum]
BGI_novel_G013294	1756	47	701	3.92271	2.66991e-147	Up	6.07682e-148	NA	GO:0016021//integral component of membrane	GO:0015238//drug transmembrane transporter activity;GO:0015297//antiporter activity	NA	K03327//multidrug resistance protein, MATE family	XP_016440459.1//PREDICTED: protein DETOXIFICATION 49-like [Nicotiana tabacum]
109120792	2962	1063	2573	1.29934	2.98086e-147	Up	6.78767e-148	LOC109120792	NA	NA	NA	K20888//xyloglucan galactosyltransferase MUR3 [EC:2.4.1.-];K01426//amidase [EC:3.5.1.4]	gi|460366928|ref|XP_004229327.1|//PREDICTED: uncharacterized protein LOC101267053 [Solanum lycopersicum]
BGI_novel_G010879	2342	1055.85	0	-11.0202	3.69008e-147	Down	8.41038e-148	NA	GO:0005737//cytoplasm	GO:0043022//ribosome binding;GO:0005525//GTP binding	NA	K03665//GTPase	XP_004238264.1//PREDICTED: uncharacterized protein LOC101261514 [Solanum lycopersicum]
101244536	674	493.77	1644.15	1.75946	4.19081e-147	Up	9.55602e-148	LOC101244536	NA	NA	NA	NA	gi|460371184|ref|XP_004231423.1|//PREDICTED: transcription factor RADIALIS [Solanum lycopersicum]
BGI_novel_G021820	3919	1432.92	359.57	-1.97058	5.2945e-147	Down	1.20782e-147	NA	NA	GO:0003899//DNA-directed 5'-3' RNA polymerase activity;GO:0032549//ribonucleoside binding;GO:0003677//DNA binding	GO:0006351//transcription, DNA-templated	K03021//DNA-directed RNA polymerase III subunit RPC2 [EC:2.7.7.6]	XP_006362214.1//PREDICTED: DNA-directed RNA polymerase III subunit 2-like [Solanum tuberosum]
101248932	1031	839.49	91.92	-3.16703	6.05644e-147	Down	1.38291e-147	LOC101248932	NA	NA	NA	NA	gi|460372791|ref|XP_004232208.1|//PREDICTED: uncharacterized protein LOC101248932 [Solanum lycopersicum]
BGI_novel_G007992	1784	85.26	804.09	3.26145	6.90648e-147	Up	1.57774e-147	NA	GO:0005634//nucleus;GO:0005667//transcription factor complex	GO:0003677//DNA binding;GO:0003700//DNA binding transcription factor activity	GO:0032876//negative regulation of DNA endoreduplication;GO:0006351//transcription, DNA-templated;GO:0042023//DNA endoreduplication	K09391//transcription factor E2F7/8	XP_004236152.1//PREDICTED: E2F transcription factor-like E2FE [Solanum lycopersicum]
101268475	4176	1757.16	3585.36	1.05291	9.31684e-147	Up	2.12934e-147	LOC101268475	NA	NA	NA	K10406//kinesin family member C2/C3	gi|460389882|ref|XP_004240576.1|//PREDICTED: kinesin-4-like [Solanum lycopersicum]
100134914	2589	632.81	18.89	-5.04204	1.35957e-146	Down	3.11012e-147	HSP70	NA	NA	NA	K03283//heat shock 70kDa protein 1/2/6/8	gi|929524253|ref|NP_001233780.2|//heat shock protein 70 [Solanum lycopersicum]
101245171	2136	24.91	636.04	4.69835	1.51932e-146	Up	3.47874e-147	LOC101245171	NA	NA	NA	K08472//mlo protein	gi|460389894|ref|XP_004240581.1|//PREDICTED: MLO-like protein 6 [Solanum lycopersicum]
101257919	2934	1048.76	0	-11.0104	2.047e-146	Down	4.69125e-147	LOC101257919	NA	NA	NA	K02367//glucuronyl/N-acetylglucosaminyl transferase EXT2 [EC:2.4.1.224 2.4.1.225]	gi|460409176|ref|XP_004250015.1|//PREDICTED: glycosyltransferase family protein 64 protein C5 [Solanum lycopersicum]
[truncated: 9,697 more rows]
