# Supplementary material for: Integrating omics reveals insights into tomato abaxial/adaxial leafy supplemental lighting
Source: Front Plant Sci. 2023 Apr 5;14:1118895. doi: 10.3389/fpls.2023.1118895 (PMC10113477; doi:10.3389/fpls.2023.1118895)
Supplement: Supplementary file 6 [file Table_3.xlsx]

## Sheet: Sheet1
Table S3. Differentially expressed proteins (DEPs) between AB samples and AD samples.
No.	Protein_ID	Mass	Protein_Coverage	Uniq_Pep_Num	Uniq_Spec_Num	Mean_Ratio_AB-vs-AD	Ratio_AB-vs-AD	SD_AB-vs-AD	Quant_Num_AB-VS-AD	Pvalue_UP-VS-IP	Protein_Seqence	NCBInr Identity	NCBInr E-value	NCBInr Accession	NCBInr Description	Swissprot Identity	Swissprot E-value	Swissprot Accession	Swissprot Description	Protein_or_Domain	KOG Score	KOG E-value	KOG ID	KOG Function-Description	KOG Code	KOG Function-Categories	KEGG(ko_id|rank|evalue|score|subject_id|ko_definition)	GO Biological_Process	GO Molecular_Function	GO Cellular_Component
1	Solyc09g007920.2.1	78886.3	0.316	3	14	0.83	0.840|0.825|0.844|0.821	0.011	4	0.0001086	MASSIVQNGHVNGEAMDLCKKSINVNDPLNWEMAAESLRGSHLDEVKKMVDEFRKPIVKLGGETLTVAQVASIANVDNKSNGVKVELSESARAGVKASSDWVMDSMGKGTDSYGVTTGFGATSHRRTKNGGALQKELIRFLNAGVFGNGTESSHTLPHSATRAAMLVRINTLLQGYSGIRFEILEAITKLINSNITPCLPLRGTITASGDLVPLSYIAGLLTGRPNSKAVGPNGEKLNAEEAFRVAGVTSGFFELQPKEGLALVNGTAVGSGMASMVLFESNILAVMSEVLSAIFAEVMNGKPEFTDYLTHKLKHHPGQIEAAAIMEHILDGSSYVKAAQKLHEMDPLQKPKQDRYALRTSPQWLGPQIEVIRAATKMIEREINSVNDNPLIDVSRNKA…	100	0	NP_001307538.1	phenylalanine ammonia-lyase 3 [Solanum lycopersicum]	97.92	0	sp|P26600|PAL5_SOLLC	Phenylalanine ammonia-lyase OS=Solanum lycopersicum GN=PAL5 PE=3 SV=1	At2g37040	1244	0	KOG0222	Phenylalanine and histidine ammonia-lyase	Q	Secondary metabolites biosynthesis, transport and catabolism	K10775|1|0.0|1491|sly:101243922|phenylalanine ammonia-lyase [EC:4.3.1.24]	GO:0009800//cinnamic acid biosynthetic process;GO:0006559//L-phenylalanine catabolic process	GO:0045548//phenylalanine ammonia-lyase activity	GO:0005737//cytoplasm
2	Solyc05g015040.2.1	79202.4	0.009	1	1	0.58	0.610|0.402|0.807|0.512	0.172	4	0.02993	MGDLPIVRFEEKIVETVKENPVVVVIGETGSGKSTQLPQILYRRGYAKSGIIAVTQPRRVAAVSVSRRVAQEQNVRIGEEVGYAIRFEDRTSEKTRIKYLTDGVLLRESLFNPELNQYSVIILDEAHERSLNTDILLGLMKRLIKWRHSNLKVLITSATLDGGKVSRFFSDCPVLTVPGELFPVEIVHISEPPKSYVEASLKKAIDIHVREPEGDILIFMTGQDDIEKLVLKLEERVQSLEEGSCMDALILPLHGSLPPEMQVRVFSPPPPNCRRFIVSTNIAETSLTVDGVVYVIDSGYVKQRQYNPSTGMYSLEVVQISKVQAKQRAGRAGRTRPGKCYRLYPSTVYHDDFLDATVPEIQRSSLAGTVLYLKSLDLADMDILKFDFLDSPSVKSLED…	100	0	XP_004239197.1	PREDICTED: probable pre-mRNA-splicing factor ATP-dependent RNA helicase DEAH4 [Solanum lycopersicum]	75.46	0	sp|Q93Y16|DEAH4_ARATH	Probable pre-mRNA-splicing factor ATP-dependent RNA helicase DEAH4 OS=Arabidopsis thaliana GN=At1g27900 PE=1 SV=1	At1g27900	1063	0	KOG0922	DEAH-box RNA helicase	A	RNA processing and modification	K12818|1|0.0|1436|sly:101264721|ATP-dependent RNA helicase DHX8/PRP22 [EC:3.6.4.13]	GO:0006396//RNA processing	GO:0004004//ATP-dependent RNA helicase activity;GO:0004386//helicase activity;GO:0003723//RNA binding;GO:0003676//nucleic acid binding;GO:0005524//ATP binding	GO:0005737//cytoplasm;GO:0005730//nucleolus
3	Solyc09g065860.2.1	35408	0.029	1	1	0.61	0.464|0.598|0.610|0.755	0.119	4	0.0141	MEASSFPATFTKLRYPFSETLLSKREDFPVWIKCYASPLSTKNATGTSLCQAGFRTRKWSLLQVSCSREREIPVIEAGCMDDIYDALAEHLVPTAAAASSPNFKHIVGLAGPPGAGKSTVASEVVKRVNKLWPQKSRSFDSQVEPPEVAIVLPMDGFHLYRHQLDAMEDPKEAHARRGAPWTFDPNLLLECLKTLKDQGSVYCPSFDHGVGDPVEDDIFVNLQHKIVIVEGNYLLLRDGAWKEVSSMFDEKWFVDVDLEKAMQRVLKRHISTGKSPNVAKWRIDYNDRPNAELIMKSKNNADLVIKSIDELR	100	0	XP_004247213.1	PREDICTED: putative uridine kinase C227.14 isoform X1 [Solanum lycopersicum]	24.77	2e-07	sp|Q9LTY6|UKL5_ARATH	Uridine kinase-like protein 5 OS=Arabidopsis thaliana GN=UKL5 PE=2 SV=1	At1g03030	395	3e-138	KOG2702	Predicted panthothenate kinase/uridine kinase-related protein	FH	Nucleotide transport and metabolism;Coenzyme transport and metabolism	K17065|1|9e-66|226|smo:SELMODRAFT_404911|dynamin 1-like protein [EC:3.6.5.5]!K00876|2|9e-08|57.4|mdm:103442200|uridine kinase [EC:2.7.1.48]	GO:0043097//pyrimidine nucleoside salvage;GO:0006206//pyrimidine nucleobase metabolic process	GO:0016301//kinase activity;GO:0004849//uridine kinase activity;GO:0005524//ATP binding	GO:0005829//cytosol;GO:0009507//chloroplast
4	Solyc10g006560.2.1	13836.5	0.121	1	1	0.63	0.525|0.510|0.765|0.717	0.131	4	0.01945	MAGRGKTLGSGTAKKATSRSSKAGLQFPVGRIARFLKAGKYAERVGAGAPVYLAAVLEYLAAEVLELAGNAARDNKKTRIVPRHIQLAVRNDEELSKLLGDVTIANGGVMPNIHNLLLPKKTGGSKPSADED	100	3e-90	XP_004248368.1	PREDICTED: probable histone H2A.1 [Solanum lycopersicum]	95.45	9e-89	sp|Q9C681|H2A1_ARATH	Probable histone H2A.1 OS=Arabidopsis thaliana GN=At1g51060 PE=1 SV=1	At1g51060	253	2e-88	KOG1756	Histone 2A	B	Chromatin structure and dynamics	K11251|1|4e-91|263|sot:102582157|histone H2A	GO:0006342//chromatin silencing	GO:0003677//DNA binding;GO:0046982//protein heterodimerization activity	GO:0005634//nucleus;GO:0000786//nucleosome;GO:0000790//nuclear chromatin
5	Solyc01g010830.2.1	28694.6	0.019	1	1	0.64	0.555|0.558|0.749|0.709	0.101	4	0.01051	MEAGTFLRALNPFKFRAKFSGSYTTRCSSSSSSIKIPTGKEMGRRAYDGLLLDAANTLLQLSKPVEETYAGIGKKYGLTTSPAEIKQGFKRAFSAPWPENLRYQDDGRPFWKLVVSEATGCSDDTYFEEVYQHYASGEAWHLPAGAYDTILILKRSGVKLAVVSNFDTRLRKILKDLNMLDLFDAVIISSEVGHEKPDTKIFRAALDQISVEAMKTVHVGDDEKADKGGANAAGIDCWLWGVDVKSFGDIQNRILTEP	100	0	XP_010322186.2	PREDICTED: haloacid dehalogenase-like hydrolase domain-containing protein 3 isoform X2 [Solanum lycopersicum]	-	-	-	-	At1g14310	346	6e-121	KOG3085	Predicted hydrolase (HAD superfamily)	R	General function prediction only	K01082|1|1e-27|115|bpg:Bathy09g01660|3'(2'), 5'-bisphosphate nucleotidase [EC:3.1.3.7]	GO:0008152//metabolic process	GO:0016787//hydrolase activity	-
6	Solyc08g077780.2.1	38724.8	0.038	1	1	0.65	0.560|0.827|0.504|0.689	0.144	4	0.02546	MEEKYELLKELGAGNFGVARLVKDKKTKELLAVKYIERGKKIDENVQREIINHRSLRHPNIVRFKEVLVTPSHLAIVMEYAAGGELFGRICSAGRFSEDEARFFFQQLISGVSYCHTMEICHRDLKLENTLLDGSPSPRLKICDFGYSKSGLLHSQPKSTVGTPAYIAPEVLSRKEYDGKIADVWSCGVTLYVMLVGAYPFEDPEDPKNFRKTIGRIMSAQHSIPDYVRVTPDCRNLLSRIFVANPSKRITIPEIKKHPWFLKNLPKELMDVEHARFEEASEQLQQSVEEIMKMIQEAKVPGVVSKSEGKDPAGTAEQDDLEEDLESEIDSSNDFAVYV	100	0	XP_004245833.1	PREDICTED: serine/threonine-protein kinase SAPK3 [Solanum lycopersicum]	76.4	0	sp|P0C5D6|SAPK3_ORYSJ	Serine/threonine-protein kinase SAPK3 OS=Oryza sativa subsp. japonica GN=SAPK3 PE=1 SV=1	At4g33950	508	0	KOG0583	Serine/threonine protein kinase	T	Signal transduction mechanisms	K14498|1|0.0|701|sly:101250433|serine/threonine-protein kinase SRK2 [EC:2.7.11.1]	GO:0006468//protein phosphorylation;GO:0035556//intracellular signal transduction	GO:0004674//protein serine/threonine kinase activity;GO:0005524//ATP binding	GO:0005737//cytoplasm;GO:0005634//nucleus
7	Solyc11g065370.1.1	49737.6	0.025	1	1	0.66	0.669|0.654|0.691|0.637	0.023	4	0.0001615	MENLMATYQDEEEEEITADPAPLSAVEAPVTLEEVLQEVAKKGSVDTPEPESDVPSADPKSPLKSTKLEEDNDDEEEDEEEEEEEVDEPPPKKQKQLSSLTLESPKIEKEEEEDLAKLPLSTPATAKGMASSGSKKKAKSKSKKKNNNNNLWTKSSSRKGKKKNKNNTSNQKSNGKKNGVVPEQEAEDKVYIIPIPRFPDKNDDSPDVKICLSKVYKAEKVDVSEDRLTAGSTKGYRMVRATRGVLEGAWYFEIKVVKLGDTGHTRLGWSTDKGDLQAPVGYDGNSFGYRDIDGSKIHKALREKYGEEGYGEGDVIGLYINLPEGAQYAPKPPRLVWYKGQRYMCAADPKEDPPKIIPGSEISFFKNGVCQGVAFKDLYGGRYYPAASMYTLPDQPNCT…	99.773	0	XP_004250921.1	PREDICTED: protein TRAUCO [Solanum lycopersicum]	67.41	2e-169	sp|Q9C8J7|TRO_ARATH	Protein TRAUCO OS=Arabidopsis thaliana GN=TRO PE=1 SV=1	At1g51450	485	4e-169	KOG2626	Histone H3 (Lys4) methyltransferase complex, subunit CPS60/ASH2/BRE2	BK	Chromatin structure and dynamics;Transcription	K14964|1|0.0|895|sly:101243859|Set1/Ash2 histone methyltransferase complex subunit ASH2	GO:0009793//embryo development ending in seed dormancy;GO:0010228//vegetative to reproductive phase transition of meristem;GO:0060776//simple leaf morphogenesis;GO:0080182//histone H3-K4 trimethylation	GO:0031490//chromatin DNA binding	GO:0030529//intracellular ribonucleoprotein complex;GO:0048188//Set1C/COMPASS complex;GO:0019013//viral nucleocapsid
8	Solyc10g006050.2.1	45951.1	0.035	1	1	0.68	0.870|0.593|0.756|0.506	0.163	4	0.0442	MRDRNTGRARGFGFVVFADPVVAERVVKEKHMIDGRTVEAKKAVPRDDQQIINRNNSSIQGSPGGGRTKKIFVGGLASTVTESDFKTYFDQFGTITDVVVMYDHNTQRPRGFGFITYDSEEAVDRTLFKIFHELNGKMVEVKRAVPKELSPAPNCSPLMGYNYGHNRANNFLNNYAAQGYNLASVGGYGVRMDGRFSPVAGARAGFSQFASPAYGMGVNLDPALSPTFAGASNFSNNLGYGRILNPYFGANSSRYTTPIGYSTSNNRADSFLSSPTRNLWGNIGLNASASSGGPGSFVGSGSGNYGVFGNNNANWGSLISVPGGNSSGYGGGNFRSGENNYGLGSGGLGRNNAATTSSFTTSTGAYEGSYGDQFRGASVYGDRTWQGVSSDADGSGSFE…	100	0	XP_004248330.1	PREDICTED: heterogeneous nuclear ribonucleoprotein 1 [Solanum lycopersicum]	54.84	3e-54	sp|Q8W034|RNP1_ARATH	Heterogeneous nuclear ribonucleoprotein 1 OS=Arabidopsis thaliana GN=RNP1 PE=1 SV=1	At3g07810	407	6e-139	KOG4205	RNA-binding protein musashi/mRNA cleavage and polyadenylation factor I complex, subunit HRP1	A	RNA processing and modification	K14411|1|0.0|825|sly:101261462|RNA-binding protein Musashi		GO:0003723//RNA binding	GO:0019013//viral nucleocapsid;GO:0030529//intracellular ribonucleoprotein complex
9	Solyc05g054520.2.1	41670.1	0.033	1	1	0.69	0.709|0.696|0.704|0.646	0.029	4	0.0004139	MAEEDSDFLSLSDLESELDSISIPMFFDKNRHICYLEMMLELLPSPYQSQEINRLTLAYFVVCGLDILRSLDRVDKEGVINWVLSLQTHLQDEAELSNGQFYGFHGSRSSQFQPNDYGNAIPNCSHLASTYCALSILKTLGYDLTLMDSMSIIKSMKNLQQHDGSFMPIHSGAETDLRFVYCAAAISSMLENWSGIDKEKAKEYIINCQSYDGGFGLTPSSESHGGATFCAVASLRLMGLIEDDILSKNVSSCFIDVPLLLDWCLQRQAATDGGFQGRLNKATDTCYAFWVGGVLKILGAHKFIDYEGLRKFLFTCQSQYGGFGKTPEQLPDLYHAYYGFCAFSMLEEPGLKSICTELGITNGPVQLL	100	0	XP_004239787.1	PREDICTED: geranylgeranyl transferase type-1 subunit beta [Solanum lycopersicum]	65.87	7e-154	sp|O80642|PGT1_ARATH	Geranylgeranyl transferase type-1 subunit beta OS=Arabidopsis thaliana GN=GGB PE=1 SV=1	At2g39550	438	1e-153	KOG0367	Protein geranylgeranyltransferase Type I, beta subunit	O	Posttranslational modification, protein turnover, chaperones	K11713|1|0.0|762|sly:101263319|geranylgeranyl transferase type-1 subunit beta [EC:2.5.1.59]	GO:0009733//response to auxin;GO:0009737//response to abscisic acid;GO:0009414//response to water deprivation;GO:0018344//protein geranylgeranylation	GO:0016740//transferase activity;GO:0004662//CAAX-protein geranylgeranyltransferase activity	GO:0005953//CAAX-protein geranylgeranyltransferase complex
10	Solyc02g089230.2.1	26695.4	0.043	1	1	0.69	0.620|0.839|0.574|0.727	0.118	4	0.0203	MLPLNLRKFLISSRFLHRLMATNCGKKFIRIDISSDTVCPWCFVGKKNLHKAIALTSDQYDFEIKWHPFLLNPSAPKEGINKKDYYRNKFGSRSEQMMSRMSEVFKGLGMEYNMSGLTGSSLDSHRLLYFAGQQGLDKQNNLAEELFLGYFTQGRYIGDREFLIEAARKVGVEGAADFLEDPNNGLKEVNEELQQHSSNISGVPHFVLNGKYQLSGGQPPESFIRAFQAASNVTA	100	8e-177	XP_004232135.1	PREDICTED: uncharacterized protein LOC101251049 [Solanum lycopersicum]	-	-	-	-	-	-	-	-	-	-	-	K11649|1|6e-13|72.0|olu:OSTLU_17735|SWI/SNF related-matrix-associated actin-dependent regulator of chromatin subfamily C	GO:0009817//defense response to fungus, incompatible interaction	GO:0015035//protein disulfide oxidoreductase activity	GO:0005829//cytosol
11	Solyc04g007200.2.1	23548	0.054	1	1	0.72	0.702|0.746|0.707|0.728	0.02	4	0.0001707	MSQSIVSPLIGNNCLADFPNRRPPSTFPVRQLHLPNLQLSASKSRSFDTNAFDLNGTRGIGDLYFHEVELKVRDYELDQFGVVNNATYASYCQHCRHEYLERIGLSVDEVCRNGDALATTEADKYLAPLRSGDRFVVKVRLSGSTAARLYFEHFIFKLPDQEPILEARGTSVWLDKSYRPVRIPSEFRSKFDQFIHQKGSNY	100	2e-151	NP_001307453.1	methylketone synthase IIb [Solanum lycopersicum]	63.31	1e-76	sp|Q8W583|ALT3_ARATH	Acyl-acyl carrier protein thioesterase ATL3, chloroplastic OS=Arabidopsis thaliana GN=ALT3 PE=2 SV=1	-	-	-	-	-	-	-	-	-	-	-
12	Solyc09g047900.1.1	43013.4	0.026	1	1	0.72	0.606|0.669|0.792|0.826	0.103	4	0.01955	MATLHSCSFSSLHSFPSVTLKYSRTQPRILRFNCRSSSDDKEDYLLDAPVSVGDGFSFSGGKYSDEPSPADEWFDRGKFVKAYPVSGTGEKAKDPIFGLTMGESSQASSDLFRWFCVESGSSNNSPILLIHGLPSQAYSYRKVLPMLENNYHAIALDWLGFGFSDKPQPKYGFDYTLDEYVASLESVINALTDKKVTLVVQGYFSAIAIKYASNHQEKLNGLILLNPPLTINHAKLPSSLSVLSNFLLGEIFCQDPLRASDKTLQSCGPYQIKEDVAMVYRRPYLTSGSAGFALNAISKAMKKQLKGYVEDTRAILMDNNWSVQTTVCWGQRDRWLSFDGVEDFCKESKHRLVELPMSGHHVQEDSGEELGQLIAGIVGKRSSL	100	0	XP_004246996.1	PREDICTED: uncharacterized protein LOC101263149 isoform X2 [Solanum lycopersicum]	29.93	7e-07	sp|O22977|BDG3_ARATH	Probable lysophospholipase BODYGUARD 3 OS=Arabidopsis thaliana GN=BDG3 PE=2 SV=1	At4g12830	391	9e-136	KOG1454	Predicted hydrolase/acyltransferase (alpha/beta hydrolase superfamily)	R	General function prediction only	K08726|1|7e-07|53.1|nta:107766629|soluble epoxide hydrolase / lipid-phosphate phosphatase [EC:3.3.2.10 3.1.3.76]		GO:0016787//hydrolase activity	GO:0009507//chloroplast
13	Solyc10g086670.1.1	18863.8	0.054	1	1	0.73	0.831|0.700|0.754|0.627	0.086	4	0.01229	MGNKEKTIGVAVDFSRSSKEALKWTVENLAEKSDTVYLIHIKTHTLSESRDQLWAKTGSPLIPWVEFRDPEVMKYYDIKKTDVQVVDLLDAATKQKQINIVAKVYWGDAREKVCDSIEDLRLDSLVMGSRGLSAIQRIMLGSVTNYVLNNAACPVTIVKDPDFHKH	100	5e-121	XP_004249840.1	PREDICTED: universal stress protein PHOS32 [Solanum lycopersicum]	25.15	5e-12	sp|Q8LGG8|USPAL_ARATH	Universal stress protein A-like protein OS=Arabidopsis thaliana GN=At3g01520 PE=1 SV=2	-	-	-	-	-	-	-	-	GO:0006950//response to stress	-	-
14	Solyc04g057880.2.1	156546	0.009	1	1	0.73	0.825|0.588|0.879|0.626	0.144	4	0.04516	MVQAVEHNSVLEIAQSEHKKSKTTKKGKGKGRQGKNHTGQNSQRSKGKSSIPTGPADKVKFGSRCLMDVVPLIDDHMDKQCTTGKEFKELPNVARNFDDRLEAGLPSLQFSSCNRNLDNVYVSVSELCLSGKNISQEPVDKHLDFHHESPSQEGTSIDNRCSDSGTSPDSEVINLVPDNQIIEGEPEELNDLIPSRPSVAPGDVLSLRVYDRSKKGRKKDRLPKFASSGSKDLLSSDSMSNSQIFGPLMQGDKVQGGSCYADTSALTIGRISSGNISSTEIISGELLPCSGVPEFNISCAASKLGSGIEGNVCSSFGTESPETEFAEKVVSCHDGQNITKSGRSNLSGKGRSQVPTQKLSKSRESASKKKGNKEKQDNKLEVRHENNQVKSLSEVKNHP…	100	0	XP_010319721.1	PREDICTED: histone-lysine N-methyltransferase ASHH2 [Solanum lycopersicum]	52.91	1e-139	sp|Q2LAE1|ASHH2_ARATH	Histone-lysine N-methyltransferase ASHH2 OS=Arabidopsis thaliana GN=ASHH2 PE=1 SV=1	At1g77300	363	2e-113	KOG4442	Clathrin coat binding protein/Huntingtin interacting protein HIP1, involved in regulation of endocytosis	U	Intracellular trafficking, secretion, and vesicular transport	K11423|1|0.0|2880|sly:101245641|histone-lysine N-methyltransferase SETD2 [EC:2.1.1.43]		GO:0018024//histone-lysine N-methyltransferase activity;GO:0008270//zinc ion binding	GO:0005634//nucleus
15	Solyc05g053430.2.1	13657.3	0.132	1	1	0.74	0.780|0.817|0.674|0.680	0.072	4	0.00794	MSTMKFCRECNNILYPKEDKEQKILLYACRNCDHQEPAENNCVYRNEIHHSAAERTQVLQDVAADPTLPRTKSVRCSQCGHGEAVFFQATARGEEGMTLFFVCCNPNCGHRWRD	100	1e-82	XP_004239877.1	PREDICTED: DNA-directed RNA polymerases II, IV and V subunit 9A [Solanum lycopersicum]	87.72	5e-76	sp|Q6NLH0|RPB9A_ARATH	DNA-directed RNA polymerases II, IV and V subunit 9A OS=Arabidopsis thaliana GN=NRPB9A PE=1 SV=1	At3g16980	220	1e-75	KOG2691	RNA polymerase II subunit 9	K	Transcription	K03017|1|2e-83|242|nto:104102070|DNA-directed RNA polymerase II subunit RPB9	GO:0001193//maintenance of transcriptional fidelity during DNA-templated transcription elongation from RNA polymerase II promoter;GO:0006283//transcription-coupled nucleotide-excision repair;GO:0006367//transcription initiation from RNA polymerase II promoter;GO:0006351//transcription, DNA-templated;GO:0006379//mRNA cleavage	GO:0003676//nucleic acid binding;GO:0003899//DNA-directed 5'-3' RNA polymerase activity;GO:0008270//zinc ion binding	GO:0005730//nucleolus;GO:0005665//DNA-directed RNA polymerase II, core complex
16	Solyc01g066860.2.1	17033.1	0.09	1	2	0.74	0.606|0.695|0.795|0.871	0.116	4	0.03017	MADSNYVDREKQKQADNDIKDMISSLTKRLAGLQRVHKASGGDSGQNLQGDDEDDHGTRIITLAGTNVGASMRGEMDEKAGIEGVSPGENEALKTYVNSNFQSINNSIMMGGSYCTNDPGVHLDITDRVDEQLPKPQGYKHKKGKKSDHHYEHSE	100	4e-112	XP_010321742.1	PREDICTED: uncharacterized protein LOC104647762 [Solanum lycopersicum]	-	-	-	-	-	-	-	-	-	-	-	-	-	-	-
17	Solyc09g009890.2.1	53344.9	0.031	2	2	0.75	0.736|0.772|0.745|0.761	0.016	4	0.0001175	MPRTRASAAAIKSEPEKPVETEEHVDFEGDNEEEEEIEYEEVEEEVEMEEEEEEEVEEEVEEEEEEEEEEENGSDGAGEGKGSEDVKMKVDVDAEDMEKKHAELLALPPHGSEVYIGGITHDISEADVREFCETIGEVTEVRIMKGKDSTQNKGYAFVTYRNKELATKAIKELNNTELKGKRVKCSPAQAKHKLFIGNVPRSWGEEDMRTAVTNVGPGVITIELVKDPLNSGKNRGFAFIEYYNHACAEYSRQEMSNSDFKLDDNAPTVSWADPKNAETASSQVKAVYVKNLPQHINQDKLRELFEHHGKITKVVLPPAKPGQEQSRYGFVHFADRSSAMRALKNTEKYEIDGKILECSLAKPQVDQKSSGGSSSQKGATLPIYPPRIGYGMMGAPYGA…	100	0	XP_004246509.1	PREDICTED: heterogeneous nuclear ribonucleoprotein R [Solanum lycopersicum]	48.71	6e-152	sp|Q9ASP6|HNRPQ_ARATH	Heterogeneous nuclear ribonucleoprotein Q OS=Arabidopsis thaliana GN=LIF2 PE=1 SV=1	At3g52660	481	2e-167	KOG0117	Heterogeneous nuclear ribonucleoprotein R (RRM superfamily)	A	RNA processing and modification	K13161|1|0.0|993|sly:101253016|heterogeneous nuclear ribonucleoprotein R		GO:0003723//RNA binding	GO:0019013//viral nucleocapsid;GO:0030529//intracellular ribonucleoprotein complex
18	Solyc10g083920.1.1	57400.4	0.049	1	1	0.75	0.677|0.678|0.842|0.786	0.082	4	0.01213	MLKNIIKRGHKKVLKSEVSDFGHAPPAGGRNSGNVSTSDVVVNHASRGNMVTNSIQSQQTPSVMTSAAPASGNIENLPLFRDVQISERQVLFFRKLQICCFQFDFTDTMKLVREKEIKRHTLVELVDYVQSGAGKISESNQEEMVKMISVNIFRCLPPASHENTGSENVEQEEDEPCLEPSWPHLQLVYELLLRYVVSSDTDTKLAKRFIDHSFVLKLLDLFDSEDPREREYLKTILHRVYGKFMVHRPFIRKGINNIFYRFIYETERHSGIGELLEILGSIINGFALPMKEEHKLFLVRALIPLHKPKSVAMYHQQLSYCIVQFVEKDYKLSDTVIRGLLKYWPVTNCQKEVLFLQELEEVLETTQAAEFQRCMVPLFRQIARCLNSPHFQVAERALF…	100	0	XP_004249476.1	PREDICTED: serine/threonine protein phosphatase 2A 57 kDa regulatory subunit B' beta isoform [Solanum lycopersicum]	72.82	0	sp|O04375|2A5A_ARATH	Serine/threonine protein phosphatase 2A 57 kDa regulatory subunit B' alpha isoform OS=Arabidopsis thaliana GN=B'ALPHA PE=1 SV=1	At5g03470	743	0	KOG2085	Serine/threonine protein phosphatase 2A, regulatory subunit	T	Signal transduction mechanisms	K11584|1|0.0|1027|sly:101268818|serine/threonine-protein phosphatase 2A regulatory subunit B'	GO:0007165//signal transduction	GO:0019888//protein phosphatase regulator activity	GO:0000159//protein phosphatase type 2A complex
19	Solyc01g095620.2.1	52783.2	0.057	2	4	0.76	0.684|0.721|0.806|0.815	0.064	4	0.007136	MAQIPHIAILPSPGMGHLIPLVEFAKRIFLHHHFSVSLILPTDGPISNAQKIFLNSLPSSMDYHLLPPVNFDDLPEDVKIETRADTVSRSLTSLRQVLESIIESKKTVALVVDLFGTDAFDVAIDLKISPYIFFPSTAMGLSLFLHLPNLDETVSCEYRDLPDPIQIPGCTPIHGKDLLDPVQDRNDESYKWLLHHAKRYGMAEGIIVNSFKELEGGAIGALQKDEPGKPTVYPVGPLIQMDSGSKVDGSECMTWLDEQPRGSVLYISYGSGGTLSHEQLIEVAAGLEMSEQRFLWVVRCPNDKIANATFFNVQDSTNPLEFLPKGFLERTKGFGLVLPNWAPQARILSHESTGGFLTHCGWNSTLESVVHGVPLIAWPLYAEQKMNAVMLSEDIKVAL…	100	0	NP_001307116.1	hydroquinone glucosyltransferase [Solanum lycopersicum]	68.95	0	sp|Q9AR73|HQGT_RAUSE	Hydroquinone glucosyltransferase OS=Rauvolfia serpentina GN=AS PE=1 SV=1	At4g01070	596	0	KOG1192	UDP-glucuronosyl and UDP-glucosyl transferase	GC	Carbohydrate transport and metabolism;Energy production and conversion	K08237|1|0.0|979|sly:101244237|hydroquinone glucosyltransferase [EC:2.4.1.218]	GO:0008152//metabolic process	GO:0016758//transferase activity, transferring hexosyl groups;GO:0080044//quercetin 7-O-glucosyltransferase activity;GO:0080043//quercetin 3-O-glucosyltransferase activity	GO:0043231//intracellular membrane-bounded organelle
20	Solyc04g076390.2.1	65123.1	0.039	1	1	0.76	0.662|0.790|0.735|0.851	0.08	4	0.01367	MATLLKCYKPLLPFQRPKMHIAAAAVNSFRYYSRSRLRARCLSTIGNSKSTVDIKVVNSEGTETVLRKQQLWLHNTMSKQKELFIPKVPGKVGMYVCGVTAYDLSHIGHARVYVSFDVLYRYLNYLGYEVKYVRNFTDVDDKIIARANELGEDPIILSRRFCEEFHQDMAYLHCLPPSVEPRVSDHMPQIINMIQQILDNGCAYRINGDVYFSVDKFPEYGTLSGRKLEDNRAGERVAVDTRKKHPADFALWKTAKAGEPFWESPWGPGRPGWHIECSAMSAAYLGYTFDIHGGGMDLVFPHHENEIAQSCAACRESNITYWIHNGFVNIDSQKMSKSLGNFFTIRQVIDFYHPLALRLFLIGTHYRSPINYTIVQIESASDRLFYIYQALYDCQILST…	100	0	XP_004238002.1	PREDICTED: cysteine--tRNA ligase, chloroplastic/mitochondrial isoform X1 [Solanum lycopersicum]	69.14	0	sp|F4IPY2|SYCM_ARATH	Cysteine--tRNA ligase, chloroplastic/mitochondrial OS=Arabidopsis thaliana GN=SYCO PE=2 SV=1	At2g31170	824	0	KOG2007	Cysteinyl-tRNA synthetase	J	Translation, ribosomal structure and biogenesis	K01883|1|0.0|1193|sly:101256769|cysteinyl-tRNA synthetase [EC:6.1.1.16]	GO:0006423//cysteinyl-tRNA aminoacylation;GO:0043067//regulation of programmed cell death;GO:0010197//polar nucleus fusion;GO:0042407//cristae formation	GO:0004817//cysteine-tRNA ligase activity;GO:0005524//ATP binding	GO:0005737//cytoplasm;GO:0009570//chloroplast stroma;GO:0005739//mitochondrion
21	Solyc09g007910.2.1	78946.2	0.298	1	1	0.76	0.904|0.836|0.679|0.622	0.132	4	0.04683	MASSIVQNGHVNGEAMDLCKKSINVNDPLNWEMAAESLRGSHLDEVKKMVDEFRKPIVKLGGETLTVAQVASIANVDNKSNGVKVELSESARAGVKASSDWVMDSMGKGTDSYGVTTGFGATSHRRTKNGGALQKELIRFLNAGVFGNGTESSHTLPHSATRAAMLVRINTLLQGYSGIRFEILEAITKLINSNITPCLPLRGTITASGDLVPLSYIAGLLTGRPNSKAVGPNGEKLNAEEAFHVAGVTSGFFELQPKEGLALVNGTAVGSGMASMVLFESNILAVMSEVLSAIFAEVMNGKPEFTDYLTHKLKHHPGQIEAAAIMEHILDGSSYVKEAQKLHEMDPLQKPKQDRYALRTSPQWLGPQIEVIRAATKMIEREINSVNDNPLIDVSRNKA…	100	0	NP_001306969.1	phenylalanine ammonia-lyase [Solanum lycopersicum]	99.17	0	sp|P26600|PAL5_SOLLC	Phenylalanine ammonia-lyase OS=Solanum lycopersicum GN=PAL5 PE=3 SV=1	At2g37040	1239	0	KOG0222	Phenylalanine and histidine ammonia-lyase	Q	Secondary metabolites biosynthesis, transport and catabolism	K10775|1|0.0|1493|sly:101244220|phenylalanine ammonia-lyase [EC:4.3.1.24]	GO:0009800//cinnamic acid biosynthetic process;GO:0006559//L-phenylalanine catabolic process	GO:0045548//phenylalanine ammonia-lyase activity	GO:0005737//cytoplasm
22	Solyc06g005970.2.1	66870.7	0.07	3	4	0.77	0.819|0.735|0.769|0.750	0.037	4	0.001504	MDFVYKNPSALIEERVKDLLSRMTLEEKIGQMTQIERSVATPSVITDLSIGSILSVGGSAPFEDAPSEAWADMVDGFQKAALESRLGIPLLYGVDAIHGNNNVYGATVFPQNVGLGATRDADLVQKIGIVTALEVRACGINYTFAPCVAVCRDPRWGRCYESYGEDTELIRKMTSIVTGLQGQPPPGYPQNYPFLAGRDKVVACAKHFVGDGGTDRGINEGNTISSYEDLERIHIPPYIDCISQGVCTVMASYSKWNGSHLHSSHFLLTEVLKGKLGFKGFVISDSEGIDRFFHPHGSNYDQSILAAINAGIDMVMVPFRYQLFLDHLKYLVESGNIPMTRIDDAVERILRVKFVSGAFENPLSDRSLLDTVGCHQHRELAREAVRKSLVLLKNGKDVT…	100	0	XP_019070023.1	PREDICTED: uncharacterized protein LOC101263519 [Solanum lycopersicum]	29.56	1e-45	sp|Q9FLG1|BXL4_ARATH	Beta-D-xylosidase 4 OS=Arabidopsis thaliana GN=BXL4 PE=1 SV=1	-	-	-	-	-	-	-	K05349|1|0.0|1246|sly:101263519|beta-glucosidase [EC:3.2.1.21]	GO:0005975//carbohydrate metabolic process;GO:0009251//glucan catabolic process	GO:0008422//beta-glucosidase activity;GO:0004553//hydrolase activity, hydrolyzing O-glycosyl compounds	GO:0005886//plasma membrane
23	Solyc07g065200.2.1	22089.1	0.053	1	1	0.77	0.805|0.673|0.867|0.718	0.087	4	0.01732	MATPTTSPNSESDSDVETSPVANPSPGQNPQFTSDALTTAIPSTPVVCLLRFAGDSAAGAFMGSIFGYGSGLIKKKGFKGSFGEAGASAKTFAVLSGVHSLVVCFLKRIRGKDDVINAGVAGCCTGLALSFPGAPQALLQSCLTFGAFSFIIEGLNKQQPALALTSHMNVNSRQQFGVLAPLSLPLPNELKESFSFFCQSLKNRRHGSR	100	4e-150	XP_004244062.1	PREDICTED: mitochondrial import inner membrane translocase subunit TIM22-2 [Solanum lycopersicum]	60.09	4e-79	sp|Q94EH2|TI222_ARATH	Mitochondrial import inner membrane translocase subunit TIM22-2 OS=Arabidopsis thaliana GN=TIM22-2 PE=1 SV=1	At5g55510	234	2e-78	KOG1652	Mitochondrial import inner membrane translocase, subunit TIM17	U	Intracellular trafficking, secretion, and vesicular transport	K17790|1|2e-130|368|cann:107878777|mitochondrial import inner membrane translocase subunit TIM22	GO:0033365//protein localization to organelle	GO:0015266//protein channel activity	GO:0016021//integral component of membrane
24	Solyc01g109400.2.1	26256.9	0.033	1	1	0.77	0.877|0.809|0.734|0.674	0.088	4	0.01968	MGKGGGCMPTKNKFPINEPSAERPVIQTDITTGSEAEWSKKLRIFIVFYSMYGHVETLARRMKKGVDGIEGVEGVLYMVPEILAPDVLEQMKVPPKNDDIPVISVDELIEADGFLFGFPTRYGCMAAQMKAFFDSTGKLWREQKLAGLPAGFFVSTGTQGGGQETTSWTAVTQLAHHGMLYVPIGYTFGAGMFRMDSISGGSPYGAGTFSGDGSREPSEPELALAEHQGKCMAMTVKRLAQ	100	2e-179	XP_004230955.1	PREDICTED: probable NAD(P)H dehydrogenase (quinone) FQR1-like 2 [Solanum lycopersicum]	63.97	8e-119	sp|O23207|FQRL2_ARATH	Probable NAD(P)H dehydrogenase (quinone) FQR1-like 2 OS=Arabidopsis thaliana GN=At4g36750 PE=1 SV=1	At4g36750	340	2e-118	KOG3135	1,4-benzoquinone reductase-like; Trp repressor binding protein-like/protoplast-secreted protein	R	General function prediction only	K03809|1|3e-180|497|sly:101265288|NAD(P)H dehydrogenase (quinone) [EC:1.6.5.2]		GO:0010181//FMN binding;GO:0003955//NAD(P)H dehydrogenase (quinone) activity	GO:0005737//cytoplasm;GO:0005886//plasma membrane
25	Solyc02g067210.2.1	67309.7	0.016	1	1	0.77	0.664|0.833|0.748|0.852	0.086	4	0.01976	MKKGLEGRSTWPIDIRNGGLTISGQNPSSYKSTPCSIADFCLLFAWFLPEDSSSVPSIFAMAGRRDSYGKRSHSQSDYGENGGNKRRNTRNDKDPFSIGPDDTVYRYLCSVKKIGSIIGKGGEIVKQLRVDTKSKIRIGETVPDCDERVVTIYSSSEETNEFDGTEVRVCPAQDALFRVYDKIISDDTTDENSEEASQVTVKLLVPSDQIGCIIGKGGQIVQDIRSETGAQIRILKDKHLPACALSSDELVQISGEVAVVRKALFEVATRLHNNPSRTQHILASDAPTIYSSRSSLIGSAGGAPIVGIAPLVGPYGGYKGESSDWSRSFYSAPRDESSSKEFSLRLVCPAANIGGVIGKGGVIINQIRQESGAVIKVNSSNAEGDNCVISISAKEFFED…	100	0	XP_019067506.1	PREDICTED: RNA-binding KH domain-containing protein isoform X1 [Solanum lycopersicum]	32.85	2e-66	sp|P58223|Y4837_ARATH	KH domain-containing protein At4g18375 OS=Arabidopsis thaliana GN=At4g18375 PE=2 SV=1	At5g15270	623	0	KOG2190	PolyC-binding proteins alphaCP-1 and related KH domain proteins	AR	RNA processing and modification;General function prediction only	K21444|1|0.0|1122|sly:101244550|poly(rC)-binding protein 3/4		GO:0003723//RNA binding	-
26	Solyc10g082000.1.1	82245.4	0.019	1	1	0.77	0.620|0.829|0.723|0.892	0.12	4	0.04114	MRTGGCTIQQALTTEASNVVRQSVTLAKRRGHAQVTPLHVANTMLSSSNGIFKTACLQSHSHPLQCKALELCFNVALNRLPASSSSPMLLGHQNHNHSQYPSISNALVAAFKRAQAHQRRGSLENQQQPLLAVKIELEQLIISILDDPSVSRVMREAGFDSTQVKTNVEQVVSLELCSQNPKEINKKANPIISAKDEDVMSVVESLMNKNRKNIVLVSESIDNLQGVIKGVMNKVEIKDVHDDLKEIKFADQLLSFANIQRDEVDQRLGELTCLIKSLVKKGVVLYLGDLKWVADYRANYGEKRIISYYCSVEHMIMEIGRLVYSFSENEKFWLVGIATFQSYMRCKSGKNSLESIWGLHPITVPGGSLGLSLNPDSDTQIEVRSKTFEGEFSCREEKL…	100	0	XP_004249777.1	PREDICTED: protein SMAX1-LIKE 3-like [Solanum lycopersicum]	51.49	1e-149	sp|Q9SVD0|SMXL3_ARATH	Protein SMAX1-LIKE 3 OS=Arabidopsis thaliana GN=SMXL3 PE=2 SV=1	At3g52490	456	3e-149	KOG1051	Chaperone HSP104 and related ATP-dependent Clp proteases	O	Posttranslational modification, protein turnover, chaperones	K03695|1|0.0|622|gra:105780584|ATP-dependent Clp protease ATP-binding subunit ClpB	GO:0019538//protein metabolic process	-	-
27	Solyc01g068530.2.1	17257.4	0.327	1	1	0.78	0.803|0.730|0.836|0.757	0.047	4	0.003779	MQKQEAAAATVESVQCFGRKKTAVAVTHCKRGRGLIKINGVPIELVQPEILRYKAFEPILLLGRHRFAGVDMRIRVKGGGHTSQIYAIRQSIAKALVAFYQKFVDEQQKKEIKDILIRYDRTLLVADPRRCEPKKFGGRGARSRFQKSYR	100	7e-106	XP_004229156.1	PREDICTED: 40S ribosomal protein S16-like [Solanum lycopersicum]	89.58	3e-94	sp|O22647|RS16_FRIAG	40S ribosomal protein S16 OS=Fritillaria agrestis GN=RPS16 PE=2 SV=1	At2g09990	264	5e-92	KOG1753	40S ribosomal protein S16	J	Translation, ribosomal structure and biogenesis	K02960|1|1e-106|304|sot:102600569|small subunit ribosomal protein S16e	GO:0000462//maturation of SSU-rRNA from tricistronic rRNA transcript (SSU-rRNA, 5.8S rRNA, LSU-rRNA);GO:0006412//translation	GO:0003735//structural constituent of ribosome;GO:0003723//RNA binding	GO:0022627//cytosolic small ribosomal subunit;GO:0005840//ribosome
28	Solyc01g009780.2.1	17418.2	0.105	2	2	0.78	0.713|0.877|0.697|0.822	0.087	4	0.01903	MAKFEEPAIGIPYNPSAPYQAPMPQQFQQQYYVGQNPYQAGMVPPNAIYGDPKGIPIQQTIYRDTPAPFNCLHCGNTGLTQVKSKPSPAAFVGCMTPFMLGVCFLLPSMDCLWHKYHYCPSCNQKVADFEKSDFCLVMDPPNWEEKSFALPA	100	4e-110	XP_004228438.1	PREDICTED: uncharacterized protein LOC101266147 [Solanum lycopersicum]	78.69	6e-69	sp|Q94CD4|GILP_ARATH	GSH-induced LITAF domain protein OS=Arabidopsis thaliana GN=GILP PE=1 SV=1	-	-	-	-	-	-	-	K19363|1|5e-111|315|sly:101266147|lipopolysaccharide-induced tumor necrosis factor-alpha factor			GO:0016021//integral component of membrane
29	Solyc10g084660.1.1	16255.1	0.137	1	1	0.78	0.675|0.718|0.839|0.878	0.096	4	0.02583	MANAASGMAVHDDCKLTFLELKTKRTHRFIVFKIEEKQKQVVVEKVGEPTQSYEDFAESLPADECRYAVYDFDFVTEENCQKSRIFFIAWSPDTARVRSKMIYASSKDRFKRELDGIQIELQATDPTEMELDVIKSRAN	100	2e-100	XP_004249528.1	PREDICTED: actin-depolymerizing factor 1 [Solanum lycopersicum]	89.93	7e-93	sp|Q9FVI2|ADF1_PETHY	Actin-depolymerizing factor 1 OS=Petunia hybrida GN=ADF1 PE=2 SV=1	At3g46010	258	4e-90	KOG1735	Actin depolymerizing factor	Z	Cytoskeleton	K05765|1|3e-101|289|sly:101259796|cofilin	GO:0030042//actin filament depolymerization	GO:0003779//actin binding	GO:0015629//actin cytoskeleton
30	Solyc09g031920.1.1	22234.9	0.055	1	1	0.78	0.756|0.915|0.666|0.784	0.103	4	0.03005	MEDHKSPVAAAMGNKKRARNCCFVCLAVLVLLGLLLLTLGLTVFKTKKPVTTVDAVTLDDLDVSFDIARLQVHLNVTVKADLSIQNPNRVSFKYDTTSALLQYKGKAIGEAPLPAAKIGSRQTHPMNADTVMADRLLSDSTLYSDVMAGALHLTTYVKLSGVVHLLFKIHVKTSSTCDLFIDVLDRRLLNQTCHYKTKL	100	7e-144	XP_004246969.1	PREDICTED: uncharacterized protein LOC101268505 [Solanum lycopersicum]	20.3	3e-07	sp|Q6DST1|Y1465_ARATH	Late embryogenesis abundant protein At1g64065 OS=Arabidopsis thaliana GN=At1g64065 PE=2 SV=1	-	-	-	-	-	-	-	-			GO:0016021//integral component of membrane
31	Solyc02g077630.2.1	111237	0.011	1	1	0.78	0.651|0.740|0.840|0.884	0.104	4	0.03308	MKSSISIMFLQILVTLFLPTLIFSLNQEGLYLHNVKLGFDDPDNVLSNWNEHDDTPCNWFGVSCDKFTRSVTSLDLSNANVAGPFPTLLCRLKKLRYADYNNSLNSTLLEDFSGCEAVEHLDLAQNFLVGTLPASLSELPNLKYLDLSGNNFTGDIPVSFGSFQQLEVLGLVGNLLDGSIPAFLGNVTTLKQLNLSYNPFTTGRIPPELGNLTNLEVLWLSDCNLIGEVPDTLGRLKKIVDLDLAVNYLDGPIPSWLTELTSAEQIELYNNSFTGEFPVNGWSKMTALRRIDVSMNRLTGTIPRELCELPLESLNLYENQMFGELPQDIANSPNLYELRLFHNRFNGSLPQHLGKNSPLLWIDVSENNFSGEIPENLCGKGLLEELLMINNLLSGEIPA…	100	0	XP_004232923.1	PREDICTED: receptor-like protein kinase HSL1 [Solanum lycopersicum]	69.09	0	sp|Q9SGP2|HSL1_ARATH	Receptor-like protein kinase HSL1 OS=Arabidopsis thaliana GN=HSL1 PE=2 SV=1	At5g25910	308	8e-91	KOG0619	FOG: Leucine rich repeat	R	General function prediction only	K00924|1|0.0|1900|nta:107766616|kinase [EC:2.7.1.-]		GO:0004674//protein serine/threonine kinase activity;GO:0005524//ATP binding	GO:0016021//integral component of membrane
32	Solyc05g010160.2.1	113277	0.007	1	1	0.79	0.805|0.772|0.822|0.772	0.025	4	0.0006659	MDQDQQWLINCLNATLDPNQQVRSFAETSLQQATLQPGFGSSLCRIAEKRELPLGLPAVILKQFIKKHWQEGEEGFEHPVVSSDEKVAIRGLLLPLLDDPHRKICTAIGMAVASIAHYDWPEDWPDLLPSLMKCITDQTNMNAVHGALRCFALVSADLDDNIVPKLVPVLFPCLHSIVSSPQIYEKSLRMKALSIVYACTSMLGAMSGVYKTETSAMMSPMIQSWINQFSSILEHPVPSEDPDDWSIRMEVIKCLNQFLQNFPSLMESQFGVFMGPLWQTFVSSLAVYTRSSIEGIEDPYDGRYDSDGAEQSLESFIIQLFEFLLTILGSPKFVKVVGNNVKELVYYTIAFMQTTEQQVNTWSVDANQYVADEDDNTYSCRASGALLLEEVISSCGTQG…	98.631	0	XP_015076774.1	PREDICTED: importin-9 [Solanum pennellii]	22.3	4e-13	sp|F4J738|SAD2H_ARATH	Importin beta-like SAD2 homolog OS=Arabidopsis thaliana GN=At3g59020 PE=1 SV=1	At1g26170	1162	0	KOG2274	Predicted importin 9	UY	Intracellular trafficking, secretion, and vesicular transport;Nuclear structure	K20224|1|0.0|2016|spen:107020787|importin-9	GO:0006886//intracellular protein transport	GO:0008536//Ran GTPase binding	GO:0005634//nucleus
33	Solyc10g081260.1.1	53826.1	0.016	1	1	0.79	0.826|0.775|0.802|0.750	0.033	4	0.001445	MDNSVQERLLDSQIEKVDDNLKERIYDESKKIWRVALPGVLSRVASFGSIVVTQSFIGHISGLDLAAYALVQTLTVRFVNGILIGMSSATETLCGQAYGAGQYHMMGIYLQRSWIVGLITLTALLPFFVLATPIFHLLGENGSIADAAGYVSYWFIPFIYNFVFSLTIQMYLQAQQKNIIIAWLSIIQFVIHIPLSWLLVIQLNYGVPGAMIALSISSWFVVVGEFVYILGGWCPNTWNGFSLAALKDVLPVMKLSISSGVMVCLELWYNAVLVLLAGYMKNAEVAISAFSICLNINGWEFMADGFLGAACVRIANELGKGDAKAAKFSIKVLVSTSLIIGLFFWVVCLIFGRNLGYLFSDEKAVADSVADLSTLLAFSILLNSIYPVLSGVAVGAGLQ…	100	0	XP_010312180.1	PREDICTED: protein DETOXIFICATION 24 [Solanum lycopersicum]	55.75	0	sp|F4J158|DTX24_ARATH	Protein DETOXIFICATION 24 OS=Arabidopsis thaliana GN=DTX24 PE=2 SV=1	At3g03620	521	0	KOG1347	Uncharacterized membrane protein, predicted efflux pump	R	General function prediction only	K03327|1|0.0|976|sly:101257226|multidrug resistance protein, MATE family	GO:0006855//drug transmembrane transport	GO:0015297//antiporter activity;GO:0015238//drug transmembrane transporter activity	GO:0016021//integral component of membrane
34	Solyc01g110460.2.1	40662.1	0.023	1	1	0.79	0.805|0.844|0.742|0.751	0.048	4	0.004056	MANCEVGEQVFGKMELGLVTLLRAAWVAAILPVVIALIPSSKISFFQKFVLGFAKRGKIMQSSSNKLSVPQKLFIHFYILAFVWTTLLLVATWLYDYCTMPKITEPLLFSSIASHLTGGSRIFSSHSSHTSKEHRSRIAVSIFLLLLMEAQVLRRLFESIYVFKYSPSARMHILGYLTGLFFYTAVPADCCNHATEVYKFGLSLIQEFIVKGKDRMLATEVDWWRFLNPLIQLQWYSWIGAAIFFWGWIHQHRCHAILGSLRENRKDNDEYAVPYGDWFQYVSSPHYLAEIVVYAGFVVASGCSDLTIWLLWGFTVANLVLAAAETHRWYLHKFDNYPRNRFAIFPYVY	100	0	XP_004230939.1	PREDICTED: polyprenol reductase 2 isoform X1 [Solanum lycopersicum]	58.77	3e-140	sp|Q9SI62|POED2_ARATH	Polyprenol reductase 2 OS=Arabidopsis thaliana GN=PPRD2 PE=1 SV=2	At2g16530	394	4e-137	KOG1640	Predicted steroid reductase	I	Lipid transport and metabolism	K12345|1|0.0|694|sly:101261171|3-oxo-5-alpha-steroid 4-dehydrogenase 3 [EC:1.3.1.22 1.3.1.94]	GO:0006629//lipid metabolic process	GO:0016627//oxidoreductase activity, acting on the CH-CH group of donors	GO:0005737//cytoplasm;GO:0016021//integral component of membrane
35	Solyc01g104400.2.1	12456.3	0.053	1	4	0.79	0.788|0.799|0.847|0.729	0.048	4	0.004642	MVFVLCIVVLIQAEITHAAVYNVGGTGGWTFNTVGWPKGKRFRAGDVLTFNYSSGAHNVVAVNKGGYNSCSTPRGAKVYNKGGDKVKLVKGQNYFICNFPGHCQSGMKISVFAM	100	2e-79	XP_004230515.1	PREDICTED: basic blue protein-like [Solanum lycopersicum]	71.88	7e-49	sp|P00303|BABL_CUCSA	Basic blue protein OS=Cucumis sativus PE=1 SV=1	-	-	-	-	-	-	-	K01426|1|2e-15|74.7|jcu:105643773|amidase [EC:3.5.1.4]!K03006|2|2e-07|52.0|thj:104811869|DNA-directed RNA polymerase II subunit RPB1 [EC:2.7.7.6]		GO:0009055//electron transfer activity	-
36	Solyc06g074070.2.1	107861	0.01	1	1	0.79	0.721|0.807|0.815|0.830	0.049	4	0.005278	MYVYNKYCDFRGVVVIYLCTLGVFLVNVVFGVTNLNDFKILSDFRNGLENPELLKWPSKGNDPCGPPAWPHVFCSSDRVTQIQVQSLGLKGTLPHNFNQLDKLQNLGLQGNGFSGKLPTFSGLSDLKYAYLDNNQFDTIPADFFDGLSGVQVLALDYNPFNESGWFIPIQLQDSAQLTNFSCVQCNIVGPVPDFFGKLPSLSALKLSYNRLTGEIPDSFRDSMLRILWLNNQDSPGMTGPIDVIGTMDQLMLLWLQGNSFSGPIPDTIGDLNDLKELNFNGNQLVGLIPQGLANLDLSVLDLNNNKLMGPVPKFRAVNATYSSNSFCQTTPGVPCAPQVNALLDLLGGWNYPANLAPEWSGNDPCAGPWLGISCNSKGQITIVNLQNKNLTGTLSPSLA…	100	0	XP_004241337.1	PREDICTED: receptor-like kinase TMK3 [Solanum lycopersicum]	45.42	0	sp|Q9SIT1|TMK3_ARATH	Receptor-like kinase TMK3 OS=Arabidopsis thaliana GN=TMK3 PE=2 SV=1	At1g68690	256	6e-73	KOG1187	Serine/threonine protein kinase	T	Signal transduction mechanisms	K00924|1|0.0|804|smo:SELMODRAFT_233539|kinase [EC:2.7.1.-]	GO:0006468//protein phosphorylation;GO:0007166//cell surface receptor signaling pathway	GO:0004675//transmembrane receptor protein serine/threonine kinase activity;GO:0004674//protein serine/threonine kinase activity;GO:0005524//ATP binding	GO:0016021//integral component of membrane;GO:0005886//plasma membrane
37	Solyc02g089260.2.1	573062	0.001	1	1	0.79	0.761|0.738|0.858|0.818	0.054	4	0.006485	MAEIAKLVDVLSSGDDLSRRLRADSSLNLGFQKLCLILRQSVEPTADDANKLGLQLWDQSQIQALASLALALVNSTRSLSVERVEPVIVVAIQLSVEFALCCLEKWICNGDDSMFQSYILQLLEIALVDETDKELDLSQPCSSNVSMDMLPIAVTEDSVSKWQDDTRCMLQGGRCSKEEKTADSLLMTLASEWMHPDNVDTATIGQSVPYDRNKLIDLSQHWALVHLECVHRLVTVCKSLLKLPVPFDEKFPFPNLRKRFSFCVRVFKLLGRLTKNSSYAHFDPKLFQSVASFTEVLPTLFRLGFDFVIGNPAVESGFESQVMLLLDEFIQLVQAIFCNTYVFQNIQACIAAAIFDHLDPNLWKYSKSAAANLKPPLAYCPRVVSYVLNLILDVRNRTY…	100	0	XP_004233657.1	PREDICTED: auxin transport protein BIG [Solanum lycopersicum]	62.88	0	sp|Q9SRU2|BIG_ARATH	Auxin transport protein BIG OS=Arabidopsis thaliana GN=BIG PE=1 SV=2	At3g02260	6268	0	KOG1776	Zn-binding protein Push	T	Signal transduction mechanisms	K10691|1|0.0|1.052e+04|sly:101261294|E3 ubiquitin-protein ligase UBR4 [EC:2.3.2.27]	GO:0009733//response to auxin;GO:0009826//unidimensional cell growth;GO:0010311//lateral root formation;GO:0009620//response to fungus;GO:0048281//inflorescence morphogenesis;GO:0009926//auxin polar transport;GO:0009640//photomorphogenesis	GO:0008270//zinc ion binding	GO:0005829//cytosol;GO:0016020//membrane;GO:0009506//plasmodesma
38	Solyc07g008750.2.1	25543.2	0.04	1	1	0.79	0.732|0.736|0.855|0.824	0.062	4	0.008701	MERVTQKEIGSSSTSSSSSNRKQIPDSVMEAVNRTSKNMDDLSSNVDEFLSLYGAGVFPDLGPLQQAQSLILLAKATTTLFALRLRCKGINPDDRPVKLEFERLSLFQEKLQELMDLNKAPLRPSARINPQGAARFIEHSLPDLTPEQRKSMREISKADGPRIKYLERVVHKKRKYSDQQSVRTATQEFLEKAARELLGENQSGFKGPLQLPEGDDEDIPMKILFC	100	7e-161	XP_004242816.1	PREDICTED: nuclear nucleic acid-binding protein C1D [Solanum lycopersicum]	-	-	-	-	At5g25080	192	2e-61	KOG4835	DNA-binding protein C1D involved in regulation of double-strand break repair	L	Replication, recombination and repair	K12592|1|1e-161|449|sly:101259554|exosome complex protein LRP1	-	-	-
39	Solyc00g024570.1.1	64839.5	0.009	1	1	0.79	0.860|0.763|0.806|0.713	0.063	4	0.008788	MAADTLFDSDQIFSKLPEDIIEKILSCVTLKQRPTADVSKKWWKIIQSFEDDLNLVYNYSAKIACGYCGSSQSDRQESCLCSDTDLYHVDPFIKLAADKINFKELYLFIPPNFRYCASPKILDSNFLTVLHIKGNCNMNIIRKFNVMPSLKELYFHSVCIFSHTFSNFIPKCPLLVLLTLINCDNLNELAVPHLNCLEKLHVNTRKKITKVEVKAQNLLEFHLCSPAVTKLDLSASTKLQLLHIDSAKVPDSFPYDICSPFPSLKSLCLILCRGLKKIKIVSPLLENLTLNNIIDLEETFIDTPNLQLFNIIYSFKFKFPCPIVGSRQMKVEMGARATNNLLELRTFAENLGENTTLSLETCTSGAKGVTFHPVNLEPLRINRITLVIQPSLKPRYEYF…	100	0	XP_010314954.1	PREDICTED: uncharacterized protein LOC104645288 [Solanum lycopersicum]	-	-	-	-	-	-	-	-	-	-	-	-	-	-	-
40	Solyc06g051620.2.1	64497.5	0.041	1	1	0.79	0.760|0.882|0.730|0.799	0.066	4	0.01044	MSKQTYKVGFFFRRQFTMAAAEAPADIKSLFKRYSDDSGVMSVQNLHSFLIEIQKEKNVSLENAEAIINNHGGDSKQKGLQLDGFFKFLFSDVNPPLDPKLGIHHDMTAPLSHYYIYTGHNSYLTGNQLSSDCSDVPIIQALQRSVRVIELDIWPNSDKDDIEVLHGRTLTAPVTLIKCLRSIKEHAFCASEYPLVITLEDHLTPDLQEKVAEMITQTFGEMLFSPSESLKELPSPESLRKRVMISTKPPKEYLKSKEVKEKDDTKKEAENVFQQDDVDEEEDEDDEEDSKSDKKAASEYKRLIAIHAGKGKGGLSDWLRVDLNKVRRLSLSEPELEKAVDTHAKEIIRFTQHNLLRIYPKGIRVDSSNYDPFVGWMHGAQMVAFNMQGYGRSLWLMHG…	96.913	0	AAW22878.1	putative phospholipase C [Solanum lycopersicum]	63.75	0	sp|Q39033|PLCD2_ARATH	Phosphoinositide phospholipase C 2 OS=Arabidopsis thaliana GN=PLC2 PE=1 SV=1	At3g08510	763	0	KOG0169	Phosphoinositide-specific phospholipase C	T	Signal transduction mechanisms	K05857|1|0.0|1122|sly:100301922|phosphatidylinositol phospholipase C, delta [EC:3.1.4.11]	GO:0016042//lipid catabolic process;GO:0035556//intracellular signal transduction	GO:0004435//phosphatidylinositol phospholipase C activity;GO:0004871//signal transducer activity	GO:0005622//intracellular
41	Solyc01g096130.2.1	18156.3	0.058	1	1	0.79	0.716|0.863|0.750|0.835	0.069	4	0.01249	MANLYVKAVPPADLNRNTDWFMYPGVWTTYILILFFSWLVLTAFGCSPGMAWTVVNLSHFIVTYHFFHWKKGTPFADDQGMYNQLTWWEQIDNGKQLTRNRKFLTVVPVVLYLIASHTTDYQQPMLFFNTIAVTVLVVAKFPNMHKVRIFGINGDP	100	4e-113	XP_004230001.1	PREDICTED: ORM1-like protein 3 [Solanum lycopersicum]	-	-	-	-	At1g01230	276	8e-97	KOG3319	Predicted membrane protein	S	Function unknown	-	GO:0090156//cellular sphingolipid homeostasis;GO:1900060//negative regulation of ceramide biosynthetic process		GO:0016021//integral component of membrane;GO:0035339//SPOTS complex;GO:0005789//endoplasmic reticulum membrane
42	Solyc04g078270.2.1	59100.8	0.01	1	3	0.79	0.710|0.738|0.847|0.854	0.074	4	0.01431	MDSLYLYFPVLFFVLYIISYHFLHKLQNLPPSPFPVLPFIGHLYLLGKPFHRALFKVSNRYGSVVFLQFGSRPVLLVSSPSAAEECFTKNDIIFANRPDFLSGKHFGYNFTSLAWSSYGEHWRNLRRISSIEVLSSYRIQTLSSIRSDEINYLIRRLFRVSIEGSEKIVEIKSSLFNFTFNVLSRMIAGKRYYGEKVENSKEAKLFQDISKATITTIPKANILDFLPFMRWFGLHDVEEKMMELQKKRDNFMQKEIDEHRRLKTNGSFPSAEVVAGKKKIIMEVLLDLQKTDPEYYTDETIRSLMLVLLQAGSDTSAVTLEWAFSHLLDNPEILKTAQTEIDNKVGQDRLIDESDLAQLPYIRCIINETLRMHPAAPLLVPHLSSEECKVAGYRVPRGT…	99.61	0	XP_015072812.1	PREDICTED: uncharacterized protein LOC107017045 [Solanum pennellii]	46.9	3e-163	sp|Q9FG65|C81D1_ARATH	Cytochrome P450 81D1 OS=Arabidopsis thaliana GN=CYP81D1 PE=2 SV=1	At4g37370	477	7e-165	KOG0156	Cytochrome P450 CYP2 subfamily	Q	Secondary metabolites biosynthesis, transport and catabolism	K07408|1|0.0|617|zju:107420524|cytochrome P450 family 1 subfamily A polypeptide 1 [EC:1.14.14.1]!K07418|2|0.0|585|hbr:110672946|cytochrome P450 family 2 subfamily J [EC:1.14.14.1]!K00512|5|0.0|570|nto:104118389|steroid 17alpha-monooxygenase / 17alpha-hydroxyprogesterone deacetylase [EC:1.14.14.19 1.14.14.32]		GO:0016705//oxidoreductase activity, acting on paired donors, with incorporation or reduction of molecular oxygen;GO:0004497//monooxygenase activity;GO:0005506//iron ion binding;GO:0020037//heme binding	GO:0016021//integral component of membrane
43	Solyc06g052080.2.1	22265.1	0.13	2	2	0.79	0.674|0.810|0.797|0.893	0.09	4	0.02718	MADAYWRYTSGGQQQAAPAASAALAPFVAKRPRSEYDAPSGPEYPGYYGRDAERGMPRVGRDADPIEASYERYLRSGQISSHVASESARSLHSGISGHPPIDDPRVMGIGGSDPLAFKSRNVGMVAGRPEATLPPDASSTLFVEGLPADCTRREVSHLFRPFLGYKEVRLVPKGSRHAGGDPLILCFVDFVSPLHAATAMDALQALL	98.544	2e-146	XP_015080071.1	PREDICTED: RNA-binding protein 1-like isoform X2 [Solanum pennellii]	40.69	4e-41	sp|G7ID19|RBP2_MEDTR	RNA-binding protein 2 OS=Medicago truncatula GN=RBP2 PE=2 SV=1	-	-	-	-	-	-	-	-		GO:0003723//RNA binding	-
44	Solyc00g093000.1.1	4756.46	0.268	1	1	0.79	0.678|0.914|0.688|0.867	0.121	4	0.04864	MENKALKQRLENLAQEQLIKYFVDYFDKVDYAAGLVSPNLT	-	-	-	-	-	-	-	-	-	-	-	-	-	-	-	-	-	-	-
45	Solyc11g072460.1.1	60216.5	0.063	2	2	0.8	0.766|0.887|0.734|0.815	0.067	4	0.01199	MAEPKVKYDRQLRIWGEQGQAALEKASICLLNCGPTGSETLKNLVLGGVGSITVVDGSKVEVGDLGNNFMVDESSVGESKAKCVCTFLQELNDAVKAKFIEDCPEELIETNPSFFSQFTLVIATQLVEDSMVKLDRICREANIILIFARSYGLMGLVRISVKEHTVIESKPDHFLDDLRLNNPWPELTRFTETIDLNTTDAVVQKHTPYIVILVKIAEEWANTHGGNLPSTREEKRQFKDLIKSKMITADEENYKEAMEASYKVFSPRGIGVSLQKIIDDSCTEVDSSSSDFWVMVAALKEFIANEGGGETPLEGSIPDMTSSTELYVNLQKTYQAKAEADFLVMEQRVRNLLKKIGRDPASISKANIKNFSKNARKLAVCRYRLIEEEFNSPVQSELQ…	100	0	XP_010313520.1	PREDICTED: NEDD8-activating enzyme E1 regulatory subunit AXR1 isoform X2 [Solanum lycopersicum]	73.79	0	sp|P42744|AXR1_ARATH	NEDD8-activating enzyme E1 regulatory subunit AXR1 OS=Arabidopsis thaliana GN=AXR1 PE=1 SV=1	At1g05180	845	0	KOG2016	NEDD8-activating complex, APP-BP1/UBA5 component	O	Posttranslational modification, protein turnover, chaperones	K04532|1|0.0|1101|spen:107003068|amyloid beta precursor protein binding protein 1	GO:0045116//protein neddylation	GO:0019781//NEDD8 activating enzyme activity	GO:0005737//cytoplasm
46	Solyc02g092430.1.1	16707.2	0.158	1	1	0.8	0.817|0.903|0.722|0.757	0.079	4	0.01877	MKYNPRVSSSRRKSRKAHFTAPSSLRRVLMSAPLSSELRAKYSVRSMPVRKDDEVQVVRGTYKGREGKVVQVYRKKWVIHIERITREKVNGSTVNVGIHPSKVVISKLRLDKDRRSLLDRKAKGRAAADKDKGTKFTTEEIMQAID	100	1e-101	XP_004231922.1	PREDICTED: 60S ribosomal protein L26-1 [Solanum lycopersicum]	83.56	2e-90	sp|P51414|RL261_ARATH	60S ribosomal protein L26-1 OS=Arabidopsis thaliana GN=RPL26A PE=2 SV=2	At3g49910	259	4e-90	KOG3401	60S ribosomal protein L26	J	Translation, ribosomal structure and biogenesis	K02898|1|2e-102|293|spen:107012049|large subunit ribosomal protein L26e	GO:0042273//ribosomal large subunit biogenesis;GO:0002181//cytoplasmic translation;GO:0006412//translation	GO:0003735//structural constituent of ribosome;GO:0003723//RNA binding	GO:0015934//large ribosomal subunit;GO:0022625//cytosolic large ribosomal subunit
47	Solyc07g008190.2.1	85444.9	0.015	1	1	0.8	0.728|0.724|0.909|0.853	0.092	4	0.02973	MEFNTTPTRYGGRDGERGAGGKFKKPSARKPPATPYDRPPLNQSGRTSWLSKLVDPAYRIISGSANRILPSFISNAIAGNPPPLEEIDGELDNEDPATTQDVGDDNKCTSSYVISRSTEGNKDDSSMGKLNEIPEAEKLEEEKPKNSTPIEGKEEDPSMAKSKGISEAEKLEEEKPKNSSDSVEISRIEQLMQGKSFSRDEITRLTKILNSKIIDEQEKIASITAEGDIGRLHLAHETLRRPNDRNQDETGFAMPGTSTPLPQTNVRAEVGASPIDIARAYMGSRRLSKGNDSYGFVSKVEQAPQNRFHPPPSPKSSTCWPAAMVQDQHGHFTPLNQRGCGLVEFPRTPYSRTLLPKSRDRQTQSQVGSRWLDPSQSSIYSQEKTRTDLPLPSYGSVGP…	100	0	XP_004242779.1	PREDICTED: nuclear pore complex protein NUP1 isoform X1 [Solanum lycopersicum]	26.51	2e-20	sp|Q9CAF4|NUP1_ARATH	Nuclear pore complex protein NUP1 OS=Arabidopsis thaliana GN=NUP1 PE=1 SV=1	At3g10650	97.4	4e-20	KOG0845	Nuclear pore complex, Nup98 component (sc Nup145/Nup100/Nup116)	YU	Nuclear structure;Intracellular trafficking, secretion, and vesicular transport	K14317|1|1e-28|128|nnu:104590816|nuclear pore complex protein Nup214	-	-	-
48	Solyc03g007860.1.1	21135	0.065	1	1	0.8	0.719|0.721|0.890|0.872	0.093	4	0.02996	METLICIQIPNLFITNSFPLSQKLPIHFHKRINRIPNLQRTTWKLNAEAKGFGNGKPEISKKGNRRNNNNNDDSDEKIPTEIWERIIGRILFYVGAPLIGGVILLQIFDLIKQQKLLDLPIWLPFLTTFITFGASALGAAYGTLSASWDPEKQGSFIGLEEAQKNWVDMWAEDGADEEEENRWIN	100	4e-133	XP_004234285.1	PREDICTED: uncharacterized protein PAM68-like [Solanum lycopersicum]	51.61	2e-32	sp|Q9LTD9|Y5278_ARATH	Uncharacterized protein PAM68-like OS=Arabidopsis thaliana GN=At5g52780 PE=2 SV=1	-	-	-	-	-	-	-	-			GO:0009535//chloroplast thylakoid membrane;GO:0016021//integral component of membrane
49	Solyc06g083750.2.1	32249.8	0.034	1	1	0.8	0.809|0.671|0.950|0.782	0.115	4	0.04996	MKMGPSQIPKTFSIFFLFLVSSFPILGLSSNELTNFVYKGCANQKFQDPSGIYSQTLNTLFENLVSQSSSNKFYKTTAGNGQSAISGLFQCRGDLTSDDCNHCVKKIPDMSRKLCGQSIAARIQLNGCYLRYEMVGFQTVGANELLFKVCGENQASGAGFGDRLDTALGEIAKGVSSGNNGFYAGGYQSVYVLGQCEGDLGSGDCVNCVKNGAGRAKSECGNSISAQIYLQQCYISYTYYPNGVPSKSLSPSGTRQNTQKTVAIVLGGLVGVGLGVACLLFTRSAFKKKGYSKYGG	100	0	XP_004242374.1	PREDICTED: cysteine-rich repeat secretory protein 11 [Solanum lycopersicum]	49.83	3e-97	sp|Q6NM73|CRRS3_ARATH	Cysteine-rich repeat secretory protein 3 OS=Arabidopsis thaliana GN=CRRSP3 PE=1 SV=1	-	-	-	-	-	-	-	K04733|1|3e-21|98.2|hbr:110657435|interleukin-1 receptor-associated kinase 4 [EC:2.7.11.1]	GO:0010497//plasmodesmata-mediated intercellular transport;GO:0046739//transport of virus in multicellular host		GO:0016021//integral component of membrane;GO:0009505//plant-type cell wall;GO:0009506//plasmodesma
50	Solyc08g077510.2.1	49073.5	0.066	3	3	0.81	0.803|0.795|0.843|0.813	0.021	4	0.0005172	MEGLVKGLLNVALGNDENERDNQDRDERSRSSWAQVVTGEQEDDGVNTDSRTGYNIQDERYGRNEESRPHMMPQKGYQRNEDERRDNVNQSCWNQKEGEGNSDGWETVQKKPTKRHQQVKMDSWNNYKKPLDEQDYSNEVEYGVDMEPSEEELSDLSKACNKLWELDLNRLVPGKDYQIECGEGKKVYNKDDMAEGCLFSWLNDDVFNKPSYSRFCSLLDNYNPNQGVKENVTPEEKREQTAFIEEISRTAPIKYLHKYLSLKGIISGDYEELKRMLTRLWFDLYSRGGTSASSSAFEHVFVGEIKERGEKEVSGFHNWLQFYLEEAKGNVDYQGYIFPRRRGEIPDSETQLLTIQFEWNGVLKSVSSSLIGVSPEFEVAIYTICYFVGGEENHVEIGP…	100	0	XP_004245847.1	PREDICTED: poly(U)-specific endoribonuclease-B isoform X2 [Solanum lycopersicum]	-	-	-	-	At4g17100	308	2e-101	KOG2849	Placental protein 11	R	General function prediction only	K14648|1|0.0|865|sly:101254411|poly(U)-specific endoribonuclease [EC:3.1.-.-]		GO:0004521//endoribonuclease activity	-
51	Solyc02g084170.1.1	23075.2	0.06	1	1	0.81	0.763|0.843|0.805|0.817	0.033	4	0.001936	MQVDLNITLGIFIFYFSAEREKAGLVDLHHNFRFLLLCFGRADFRCYRGLLAVNLQFTENALPVVVEEGIAKSSGARCSRSILESIVTEAMFEVESDDLTAYGLIPEFVARLPVLVSCIPSIRADCSLTPFLLMTGRDKNYIYLATSDLLNELSKEGFKLNVSGLAVKWFVSSKFKRWTNRLCDKFFLMEKISIVILLA	43.902	7e-09	XP_020593839.1	cullin-associated NEDD8-dissociated protein 1 [Phalaenopsis equestris]	39.02	6e-09	sp|Q8L5Y6|CAND1_ARATH	Cullin-associated NEDD8-dissociated protein 1 OS=Arabidopsis thaliana GN=CAND1 PE=1 SV=1	At2g02560	55.5	1e-08	KOG1824	TATA-binding protein-interacting protein	R	General function prediction only	K17263|1|1e-09|61.6|sot:102603062|cullin-associated NEDD8-dissociated protein 1	GO:0009733//response to auxin;GO:0010051//xylem and phloem pattern formation;GO:0010265//SCF complex assembly;GO:0010228//vegetative to reproductive phase transition of meristem;GO:0016567//protein ubiquitination		GO:0005618//cell wall;GO:0005634//nucleus;GO:0005886//plasma membrane;GO:0005829//cytosol
52	Solyc05g010240.2.1	58919.4	0.031	1	1	0.81	0.812|0.766|0.857|0.795	0.038	4	0.002754	MSCSLNHLPAITLKNGSVNRISKRVSCSMLNTRAMAKELYFNHDGSTTKKLLAGVDLVAELVGVTLGPKGRNVVLGNKYGPPKIVNDGETVLKEIQLDDPLEYVGVKLVREAGAKTNNLAGDGCTTSIVLARGLIAEGVKVTAMGANVVQVSRGIEKTAKALISELKLMSREVEDHELEDVAAVSAGNDYAIGNMISEALRQVGREGVVTIEKGNSTKTNLEVVEGMQFDRGYLSPYFVTDRRKRIAELHDCKLLLVDKKISNPKELVKILDNAVKEKYPVLIIAEGIEQDALAPVIRNKLRGVLKVAAIKAPSFGERKSHYLDDIAILTGGTVIRDDIGLTLENAHKDLLGSASKVVITKDSTLIVTDGNTQTAVSKRVSQIQNLVENTEEKFQKKIL…	99.448	0	XP_010320801.1	PREDICTED: chaperonin 60 subunit beta 4, chloroplastic isoform X6 [Solanum lycopersicum]	74.95	0	sp|Q9C667|CPNB4_ARATH	Chaperonin 60 subunit beta 4, chloroplastic OS=Arabidopsis thaliana GN=CPN60B4 PE=1 SV=1	At1g26230	780	0	KOG0356	Mitochondrial chaperonin, Cpn60/Hsp60p	O	Posttranslational modification, protein turnover, chaperones	K04077|1|0.0|1065|sly:101250405|chaperonin GroEL	GO:0042026//protein refolding	GO:0005524//ATP binding	GO:0005737//cytoplasm
53	Solyc03g122170.2.1	37890.7	0.064	2	11	0.81	0.866|0.785|0.833|0.751	0.051	4	0.006551	MYYDYYTGGAEDQHTLKENVEAFSRIIIRPRILVDVSKIDMSTTILGHKTSAPIMIAPTAMHKLAHHEGEVATARGAAACDIIMGLSYMSTCTVEEIASSCNAVRFFQIYVYKRRDITALMVHRAEKNGFGAIILTADTPRLGRREADIKNKMIAPQLKNFEGLISTEYVSDKGSNIEALAAVTFDASLCWKDIEWLKSITKLPILIKGVLTSEDAIKAIEAGVAGIIVSNHGARQLDYAPATISVLEEVVHAVQGKVPVFFDGGVRRGTDIFKALALGAKAVLIGRAVIYGLAAKGEVGVKQVIQMLRDELELTMALSGCCSVEDITRNHVITEKERFICRM	100	0	XP_004235559.1	PREDICTED: peroxisomal (S)-2-hydroxy-acid oxidase GLO4 [Solanum lycopersicum]	75.15	0	sp|Q9LJH5|GLO4_ARATH	Peroxisomal (S)-2-hydroxy-acid oxidase GLO4 OS=Arabidopsis thaliana GN=GLO4 PE=2 SV=1	At3g14130	541	0	KOG0538	Glycolate oxidase	C	Energy production and conversion	K11517|1|0.0|704|sly:101255570|(S)-2-hydroxy-acid oxidase [EC:1.1.3.15]		GO:0016491//oxidoreductase activity;GO:0010181//FMN binding	-
54	Solyc03g111380.2.1	53682.8	0.051	2	3	0.81	0.757|0.755|0.871|0.840	0.059	4	0.009331	MPREIITLQVGQCGNQIGMEFWKQLCLEHGISKEGILEDFATQGGDRKDVFFYQADDQHYIPRALLMDLEPRVINGIQNGEYRNLYNHENVFIADHGGGAGNNWASGYHQGKQYEEDLMDMIDREADGSDSLEGFVLCHSIAGGTGSGMGSYLLETLNDRYSKKLVQTYSVFPNQNETSDVVVQPYNSLLTLKRLTLNADCVVVLDNTALNRIAVERLHITTPTFTQTNSLVSTVMSASTTTLRYPGYMNNDLVGLLASLIPTPRCHFLMTGYTPLTVERQANVIRKTTVLDVMRRLLQTKNIMVSSYARTKEASQAKYISILNIIQGEVDPTQVHESLQRIRERKLVNFIEWGPASIQVALSRKSPYVQTAHRVSGLMLASHTGIRHLFSKCLTQYDK…	100	0	XP_004236323.1	PREDICTED: tubulin gamma-1 chain [Solanum lycopersicum]	93.25	0	sp|P38557|TBG1_ARATH	Tubulin gamma-1 chain OS=Arabidopsis thaliana GN=TUBG1 PE=1 SV=1	At3g61650	939	0	KOG1374	Gamma tubulin	Z	Cytoskeleton	K10389|1|0.0|993|sly:101260712|tubulin gamma	GO:0007020//microtubule nucleation;GO:0031122//cytoplasmic microtubule organization	GO:0003924//GTPase activity;GO:0005525//GTP binding	GO:0000930//gamma-tubulin complex;GO:0005874//microtubule
55	Solyc11g072530.1.1	94256.7	0.016	1	1	0.81	0.711|0.874|0.765|0.871	0.081	4	0.02256	MEYIDNLPPMDLMRSEKMTFVQLIIPVESAHPAITYLGQLGLLQFRDLNADKSPFQRTFVNQVKRCAEMSRKLRFFKDQIQKAGMLPSPRPASQPDIELEELEIQLAEHEHELIEMNGNSDKLRQSYNELLEFKMVLQKASDFLVSSRSHTTAQETELSENVYSNDNYTDTASLLEQEMQPELSNQSGVRFISGIICKSKVLQFERMLFRATRGNMLFHQGVADEEILDPSSNEMVEKIVFVVFFSGEQARSKILKICEAFGANCYPVPEDMTKRRQITREVVSRLSELETTLDVGLRHRDKALTSIGFHLTKWMNMVRREKAVYDTLNMLNFDVTKKCLVGEGWCPIFAKIKIQEALQRATMDSNSQVGIIFHVMDTVDSPPTYFRTNCFTNAYQEIV…	100	0	XP_004251275.1	PREDICTED: V-type proton ATPase subunit a1 [Solanum lycopersicum]	79.21	0	sp|Q8RWZ7|VHAA1_ARATH	V-type proton ATPase subunit a1 OS=Arabidopsis thaliana GN=VHA-a1 PE=2 SV=1	At2g28520	1238	0	KOG2189	Vacuolar H+-ATPase V0 sector, subunit a	C	Energy production and conversion	K02154|1|0.0|1701|sly:101251546|V-type H+-transporting ATPase subunit a	GO:0015986//ATP synthesis coupled proton transport;GO:0015991//ATP hydrolysis coupled proton transport;GO:0007035//vacuolar acidification;GO:0070072//vacuolar proton-transporting V-type ATPase complex assembly	GO:0051117//ATPase binding;GO:0046961//proton-transporting ATPase activity, rotational mechanism;GO:0015078//hydrogen ion transmembrane transporter activity	GO:0000325//plant-type vacuole;GO:0016021//integral component of membrane;GO:0016471//vacuolar proton-transporting V-type ATPase complex;GO:0000220//vacuolar proton-transporting V-type ATPase, V0 domain
56	Solyc09g009780.2.1	19314.7	0.043	1	1	0.81	0.772|0.703|0.931|0.839	0.097	4	0.03711	MIICSLRAMMQSENSVEDSLHIRKLEVTDKEKGFIELLRQLTVCDSVSDERFKERFEEIAKYGDDHCICVIEDVRLGKIVATGSVFIEKKFVRNCGKAGHIEDVVVDSSARGMQLGKRIVEYLAHHAHSMGCYKVILDCTEENRPFYEKCGFKKKEIQMVKYFV	100	9e-111	XP_004246519.1	PREDICTED: glucosamine 6-phosphate N-acetyltransferase [Solanum lycopersicum]	70.55	3e-70	sp|Q9LFU9|GNA1_ARATH	Glucosamine 6-phosphate N-acetyltransferase OS=Arabidopsis thaliana GN=GNA1 PE=1 SV=1	At5g15770	209	5e-70	KOG3396	Glucosamine-phosphate N-acetyltransferase	M	Cell wall/membrane/envelope biogenesis	K00621|1|1e-111|317|sly:101255822|glucosamine-phosphate N-acetyltransferase [EC:2.3.1.4]	GO:0006048//UDP-N-acetylglucosamine biosynthetic process	GO:0008080//N-acetyltransferase activity;GO:0004343//glucosamine 6-phosphate N-acetyltransferase activity	-
57	Solyc12g096830.1.1	52095.4	0.024	1	1	0.81	0.697|0.769|0.886|0.906	0.099	4	0.04213	MEEKTNKSHVLVLPFPVQGHINPMVQFSKRLTSKESVKVTLITIDSVTKSMPILESSSIKIHSIPHNDETPPQSYDLFLEWFHVLVSKNFTKIVEELSDSEYPVKVLVFDSITTWAIDLAHDLGLKGAAFFTQSCALSVVYYHMDPEKNKICVFDDDDGVCLPSLPLLQKQDLPSFVCQTDLYPSLKKLVFSRNINFKKADWLLFNSFDVLEKEVISWLRTQCRIKTIGPLIPSMYLDKRLKDDKEYGLSLFKPNSETCMKWLDSREIGSVVYVSFGSLANLGEQQMEELASGLMMSDFYFLWVVRVTEENKLTEEFMSKPKEKCLIVNWCPQLDVLSHQAVGCFFTHCGWNSTLEALSLGVPMVAMPQWSDQPTNAKFISDVWQTGVRVKAGENGVVN…	100	0	XP_004253027.1	PREDICTED: UDP-glycosyltransferase 74E2-like [Solanum lycopersicum]	48.22	1e-147	sp|Q9SYK9|U74E2_ARATH	UDP-glycosyltransferase 74E2 OS=Arabidopsis thaliana GN=UGT74E2 PE=1 SV=1	At1g05680	428	3e-147	KOG1192	UDP-glucuronosyl and UDP-glucosyl transferase	GC	Carbohydrate transport and metabolism;Energy production and conversion	K13691|1|1e-162|470|pop:POPTR_0322s00200g|pathogen-inducible salicylic acid glucosyltransferase [EC:2.4.1.-]	GO:0008152//metabolic process	GO:0016758//transferase activity, transferring hexosyl groups;GO:0080044//quercetin 7-O-glucosyltransferase activity;GO:0080043//quercetin 3-O-glucosyltransferase activity	GO:0043231//intracellular membrane-bounded organelle
58	Solyc01g099280.2.1	53657.4	0.019	1	1	0.81	0.743|0.696|0.937|0.857	0.109	4	0.04716	MFGSGSDSGQNHTGVAGAVLMPTRFVWPYGGRRVLLSGSFTRWQDHITMSPMEGCPTVFQVVCNLVPGYHQYKFFVDGEWCHDERQPVVSGNYGLVNTIFLPRESDTIPELLSPDVPAGSNMDVDNDFLRLDAVPQISQAEIELSRQRISAFLSTHTAYELLPESGKVIALDVNLPVKQAFHVLYEQGISVAPLWDFFKGQFVGVLTAIDFILILMELGTHGSNLTEEELETHSISAWKGGKLRINRQIDCNLNSYSRSLVHGGPYDSLKDLALRFLQNKVSTLPIIHSSSPDGSFPQLLHLATLSGILKCICRHFKHSSSSLPILQQPICSIPIGTWVPKIGESSGKPVAMLRPNASLGAALSLLVQAEVSAIPIVDDNDSLLDIYCRSDITALAKDR…	100	0	XP_004230211.1	PREDICTED: sucrose nonfermenting 4-like protein [Solanum lycopersicum]	73.51	0	sp|Q944A6|SNF4_ARATH	Sucrose nonfermenting 4-like protein OS=Arabidopsis thaliana GN=SNF4 PE=1 SV=1	At1g09020	528	0	KOG1764	5'-AMP-activated protein kinase, gamma subunit	C	Energy production and conversion	K07200|1|0.0|639|sly:101267445|5'-AMP-activated protein kinase, regulatory gamma subunit	GO:0016559//peroxisome fission;GO:0000266//mitochondrial fission;GO:2000377//regulation of reactive oxygen species metabolic process;GO:0042149//cellular response to glucose starvation;GO:0009859//pollen hydration;GO:0046777//protein autophosphorylation	GO:0019887//protein kinase regulator activity;GO:0004674//protein serine/threonine kinase activity	-
59	Solyc01g097540.2.1	36067.7	0.053	1	1	0.82	0.835|0.829|0.831|0.784	0.024	4	0.0008938	MATLRIPDVVPSPAEDAETLMKSFKGLGTNEKSVISVLGHRNASQRKKIRETYQQLYNRSLVDDIFSELSGDFKKAVVLWTYEPSERDARLANEALKSKKKTITQLQVIVEIACASSPDHLVAVRQTYRGLFNCSLEEDIAANVPMPVQKVLIGLVRSYRYDKELVDPSIANKESAILRETIRTKHLDSDNFLLILSTRNVHQLRETFECYKQNYGFSIDQDMKSCGKGLLESILKVVIWCIDSPEKHFAEVVRASILGFGTDENALTRAIVTRAEVDMMKVRGEYFIANKSNLDSAVIDDTSGDYMKFLMTLLGAKV	100	0	XP_004230107.1	PREDICTED: annexin D3 [Solanum lycopersicum]	56.7	6e-135	sp|Q9SE45|ANXD3_ARATH	Annexin D3 OS=Arabidopsis thaliana GN=ANN3 PE=2 SV=2	At2g38760	385	1e-134	KOG0819	Annexin	U	Intracellular trafficking, secretion, and vesicular transport	K17098|1|0.0|659|sly:101265171|annexin D		GO:0005544//calcium-dependent phospholipid binding;GO:0005509//calcium ion binding	-
60	Solyc12g098680.1.1	39207.4	0.062	1	1	0.82	0.838|0.798|0.866|0.791	0.035	4	0.002748	MANAVPRSFLQVAAKEEEAAPPLRVVQIEGLVILKIIKHCKEFSPALVTGQLLGLDVGSVLEVTNCFPFPVREEDEEIEAEGANYQLEMMRCLREVNVDNNTVGWYQSTLFGSFQTVELIETFMNYQENIKRCVCIIYDPSRSNQGVLALKALKLSDSFMELYRSNNFTGEKLREKNLSWVDIFEEIPFKVSNSALISAFMTELEPDTPVTQCDYERLQLSTNPYLERNVEFLIECMDDLSMEQQKFQFYYRNLSRQQAQQQAWLQKRRADNMARKASGEEPLPEEDPSNPAFKPIPEPSRLDSFLITNQIANYCNQINGVAGQSFSRLYLMKALQEN	100	0	XP_004252972.1	PREDICTED: eukaryotic translation initiation factor 3 subunit H isoform X1 [Solanum lycopersicum]	83.58	0	sp|Q9C5Z2|EIF3H_ARATH	Eukaryotic translation initiation factor 3 subunit H OS=Arabidopsis thaliana GN=TIF3H1 PE=1 SV=2	At1g10840	587	0	KOG1560	Translation initiation factor 3, subunit h (eIF-3h)	J	Translation, ribosomal structure and biogenesis	K03247|1|0.0|697|sly:101255380|translation initiation factor 3 subunit H	GO:0001731//formation of translation preinitiation complex	GO:0003743//translation initiation factor activity	GO:0016282//eukaryotic 43S preinitiation complex;GO:0005852//eukaryotic translation initiation factor 3 complex;GO:0033290//eukaryotic 48S preinitiation complex
61	Solyc01g099410.2.1	15307.7	0.267	1	2	0.82	0.788|0.795|0.861|0.851	0.038	4	0.00338	MDATKTTKGAGGRKGGPRKKSVTKSIKAGLQFPVGRIGRYLKKGRYAQRVGSGAPIYLAAVLEYLAAEVLELAGNAARDNKKSRIIPRHVLLAVRNDEELGKLLAGVTIASGGVLPNINPVLLPKKSAVAEEKSPKAKAGKSPKKA	100	2e-97	NP_001296309.1	histone H2A.1 [Solanum lycopersicum]	100	1e-99	sp|P25469|H2A1_SOLLC	Histone H2A.1 OS=Solanum lycopersicum PE=2 SV=1	At5g27670	231	3e-79	KOG1756	Histone 2A	B	Chromatin structure and dynamics	K11251|1|3e-98|282|spen:107008419|histone H2A	GO:0006342//chromatin silencing	GO:0003677//DNA binding;GO:0046982//protein heterodimerization activity	GO:0005634//nucleus;GO:0000786//nucleosome;GO:0000790//nuclear chromatin
62	Solyc03g026320.2.1	19236	0.077	1	1	0.82	0.867|0.827|0.817|0.754	0.047	4	0.005883	MDFLQGSRKARRLDFLSRDYVLSFLVLLEAYLIMFYPSWKVDMNSRCSLGVMLLLVMVVFHNYSPHNLPPKKKLNSVDQIGCGKTPNLNATSALDTISERLVQEALDHLMKGRTTLVIAHRLSTVQNADQIALCSDGKIAELGTHLELLERKGQYASLVDTQRLHDTVH	98.684	2e-44	AEA86345.1	non-intrinsic ABC protein, partial [Solanum nigrum]	77.63	2e-31	sp|Q8LPQ6|AB28B_ARATH	ABC transporter B family member 28 OS=Arabidopsis thaliana GN=ABCB28 PE=2 SV=1	At4g25450	118	1e-32	KOG0055	Multidrug/pheromone exporter, ABC superfamily	Q	Secondary metabolites biosynthesis, transport and catabolism	K05657|1|9e-42|152|spen:107014364|ATP-binding cassette, subfamily B (MDR/TAP), member 10!K05655|3|2e-41|150|nta:107770825|ATP-binding cassette, subfamily B (MDR/TAP), member 8		GO:0042626//ATPase activity, coupled to transmembrane movement of substances;GO:0005524//ATP binding	GO:0016021//integral component of membrane
63	Solyc12g096060.1.1	24872.8	0.037	1	1	0.82	0.815|0.772|0.883|0.829	0.046	4	0.005975	MSLFGLGRNQRTFRPKKSAPSGSKGAQLRQHIDSTLGSGNLREAVRLPPGEDINEWLAVNTVDFFNQVNLLYGTLTEFCTPENCPTMTAGPKYEYRWADGVQIKKPIEVSAPKYVEYLMDWIETQLDDESLFPQRLGAPFPPNFKDVVKTIFKRLFRVYAHIYHSHFQKIVSLKEEAHLNTCFKHFILFTHEFGLIDKKELAPLQDLIDSIIVPY	100	1e-161	XP_004253087.1	PREDICTED: MOB kinase activator-like 1A [Solanum lycopersicum]	95.35	1e-157	sp|Q9FHI1|MOB1A_ARATH	MOB kinase activator-like 1A OS=Arabidopsis thaliana GN=MOB1A PE=2 SV=1	At5g45550	434	3e-157	KOG0440	Cell cycle-associated protein Mob1-1	D	Cell cycle control, cell division, chromosome partitioning	K06685|1|1e-162|450|sot:102591972|MOB kinase activator 1		GO:0016301//kinase activity	-
64	Solyc07g032100.2.1	137957	0.054	2	2	0.82	0.791|0.756|0.893|0.827	0.059	4	0.01041	MLTKFETKSNRVKGLSFHTQRPWILASLHSGVIQLWDYRMGTLIDRFDEHDGPVRGVHFHKSQPLFVSGGDDYKIKVWNYKLHRCLFTLLGHLDYIRTVQFHHEYPWIVSASDDQTIRIWNWQSRTCISVLTGHNHYVMCASFHPKEDLVVSASLDQTVRVWDIGALRKKTISPADDLLRLSQMNTDFFGGVDAVVKYVLEGHDRGVNWASFHPTLPLIVSGADDRQVKIWRMNDTKAWEVDTLRGHMNNVSCVLFHPRQDIIVSNSEDKSIRVWDATKRTGLQTFRREHDRFWILASHPEMNLLAAGHDSGMIVFKLERERPAFSVSSDSLFYVKDRFLRVYEYSTQKDTQLIPIRRPGSNNVNQGPRTLSYSPTENAVLICSDTDGGSYELYIVPKD…	100	0	XP_004243143.1	PREDICTED: coatomer subunit alpha-1-like [Solanum lycopersicum]	81.79	0	sp|Q94A40|COPA1_ARATH	Coatomer subunit alpha-1 OS=Arabidopsis thaliana GN=At1g62020 PE=2 SV=2	At1g62020	2115	0	KOG0292	Vesicle coat complex COPI, alpha subunit	U	Intracellular trafficking, secretion, and vesicular transport	K05236|1|0.0|2536|sly:101264027|coatomer subunit alpha	GO:0006891//intra-Golgi vesicle-mediated transport;GO:0006890//retrograde vesicle-mediated transport, Golgi to ER;GO:0006888//ER to Golgi vesicle-mediated transport;GO:0016192//vesicle-mediated transport;GO:0006886//intracellular protein transport	GO:0005198//structural molecule activity	GO:0000139//Golgi membrane;GO:0030126//COPI vesicle coat
65	Solyc12g056840.1.1	35879.3	0.035	1	1	0.82	0.783|0.910|0.773|0.833	0.063	4	0.01361	MNKTDHAPETTTLKIKAFFESAPPLKDATEIETKLKEFVDRNSSSGNGKANRVVCVTSGGTTVPLEKRCVRYIDNFSSGHRGSASTEYFLKAGYSVIFLYRRGTCQPFCRSLPDDPLLECFTSTDDLSIQVDPSHAEVVKRAIAENRSAVNGGFLLKLPFTTIFEYLQILRMIAVSLRSLGPSAMFYLAAAVSDFYVPWESMTMHKIQSGSGPLDMRLAQVPKMLYVLRNEWAPVAFCISFKLETDTDILLGKADMALKKYKMHMVVANELQTRKEEVIVVTEQEKITVRRDTTQPGADVEDPLIKLVVDRHSAYINA	100	0	XP_004252552.1	PREDICTED: phosphopantothenate--cysteine ligase 2 [Solanum lycopersicum]	67.99	2e-150	sp|Q9LZM3|PPCS2_ARATH	Phosphopantothenate--cysteine ligase 2 OS=Arabidopsis thaliana GN=PPCS2 PE=2 SV=2	At5g02080	377	4e-132	KOG2728	Uncharacterized conserved protein with similarity to phosphopantothenoylcysteine synthetase/decarboxylase	R	General function prediction only	K01922|1|0.0|664|sly:101254283|phosphopantothenate---cysteine ligase (ATP) [EC:6.3.2.51]		GO:0016874//ligase activity	-
66	Solyc12g005870.1.1	56141.1	0.054	2	4	0.82	0.746|0.901|0.743|0.902	0.091	4	0.03653	MAEPKVKYDRQLRIWGEKGQAALEKASICLLNCGPTGSETLKNLVLGGVGSITIVDGSKVEVGDLGNNFMVDESSVGQSKAECVCAFLQELNDAVKAKFIEEHPEELIETNPSFFSQFTLVIATQLVEDSMVKLDRICREANIILIFARSYGLMGLVRISVKEHTVIESKPDHFLDDLRLNDPWPELRRFAETIDLNTTDAVVHKHTPYIIILVKMAEEWTNMHGGKFPSTREEKKQFKDLIKSKMSTVDEENYKEAMEASFKVFSPVGIGPNLQKIINDSCAEVDSNSSDFWVMVAAMKEFIASEGGGETPLEGSIPDMTSSTELYVNLQKTYQAKAEADFLAMEQRVKNLLKKFSRDPASISKANIKSFCRNARKLAVCRYRLVEDEFNSPAQPELQ…	99.799	0	XP_010313671.1	PREDICTED: NEDD8-activating enzyme E1 regulatory subunit AXR1 isoform X2 [Solanum lycopersicum]	76.91	0	sp|P42744|AXR1_ARATH	NEDD8-activating enzyme E1 regulatory subunit AXR1 OS=Arabidopsis thaliana GN=AXR1 PE=1 SV=1	At1g05180	822	0	KOG2016	NEDD8-activating complex, APP-BP1/UBA5 component	O	Posttranslational modification, protein turnover, chaperones	K04532|1|0.0|1020|sly:101248944|amyloid beta precursor protein binding protein 1	GO:0045116//protein neddylation	GO:0019781//NEDD8 activating enzyme activity	-
67	Solyc06g083360.2.1	8391.12	0.127	1	1	0.82	0.768|0.715|0.932|0.860	0.096	4	0.03986	MIIPVRCFTCGKVIGNKWDEYLDLLQADYAEGDALDALNLVRYCCRRMLMTHVDLIEKLLNYNTLEKSEGS	100	1e-46	XP_004242416.1	PREDICTED: DNA-directed RNA polymerases I, II, and III subunit RPABC5 [Solanum lycopersicum]	92.96	5e-45	sp|Q39290|RPAB5_BRANA	DNA-directed RNA polymerases I, II, and III subunit RPABC5 OS=Brassica napus PE=3 SV=1	At1g61700	135	2e-43	KOG3497	DNA-directed RNA polymerase, subunit RPB10	K	Transcription	K03007|1|2e-47|148|sot:102596451|DNA-directed RNA polymerases I, II, and III subunit RPABC5	GO:0006366//transcription from RNA polymerase II promoter;GO:0006360//transcription from RNA polymerase I promoter;GO:0006351//transcription, DNA-templated;GO:0006383//transcription from RNA polymerase III promoter	GO:0003677//DNA binding;GO:0003899//DNA-directed 5'-3' RNA polymerase activity;GO:0008270//zinc ion binding	GO:0005736//DNA-directed RNA polymerase I complex;GO:0005665//DNA-directed RNA polymerase II, core complex;GO:0005666//DNA-directed RNA polymerase III complex
68	Solyc12g057080.1.1	55101.6	0.062	2	2	0.82	0.703|0.840|0.796|0.938	0.098	4	0.04194	MGSNNVELNKPHAVCIPYPAQGHINPMLKLAKILHHKGFHITFVNTEFNHRRLLKSRGPHSLDGLSSFRFETIPDGLPTCDADATQDIPSLCKSTTETCLAPFRDLLAKLNGTNNTSNVPPVTCIVSDGIMSFTLAAAQEIGVPEVLFWTTSACGFLGYMHYTTLIEKGYIPLKDVSYLTNGYLETTLDCIPGMKDVRLRDLPTFLRTTNPDDFMFKFVLQETERARNASAIILNTFDTLESEVLESLRTLLPPVYPIGPLHLLVKHVDDENLKGLGSSLWKEEPECIQWLDTKEPNSVVYVNYGSITVMTPDQLIEFAWGLANSKLEFLWIIRPDIVSGYESILPPEFVEETKNRGMLASWCSQEEVLNHPAIGGFLTHSGWNSTLESITSGVPMLCW…	100	0	XP_004252531.1	PREDICTED: 7-deoxyloganetin glucosyltransferase-like [Solanum lycopersicum]	75.88	0	sp|F8WKW1|UGT2_GARJA	7-deoxyloganetin glucosyltransferase OS=Gardenia jasminoides GN=UGT85A24 PE=1 SV=1	At1g22360	653	0	KOG1192	UDP-glucuronosyl and UDP-glucosyl transferase	GC	Carbohydrate transport and metabolism;Energy production and conversion	K21374|1|0.0|1009|sly:101248084|7-deoxyloganetin glucosyltransferase [EC:2.4.1.324]	GO:0008152//metabolic process	GO:0016758//transferase activity, transferring hexosyl groups;GO:0080044//quercetin 7-O-glucosyltransferase activity;GO:0080043//quercetin 3-O-glucosyltransferase activity	GO:0043231//intracellular membrane-bounded organelle
69	Solyc11g008960.1.1	68013.9	0.045	2	2	0.82	0.751|0.935|0.725|0.874	0.1	4	0.04442	MELFLAILILACLYSFVSPDQQGDALFALKSSLNASNDQLSDWNQNQVNPCTWSKITCDDNSNVLMVSLSNMGFTGTLTPRLGVLVHLNTLSLQGNGITGKIPEALGNLTSLTMLDLEKNRLSGEIPASLGNLKKLQFLFLSQNNLSGTIPDSLSGLPNLINLQLALNDLTGKVPDSLFQVPKYNFSENHLNCGLNFSHRCVSDSEGSPSKSKTGLVIGIVGGFLGIILLGGLMLFFWRGRNKGYKREIYVDVPGEVDRRIPFGQLRRFAWRELQLATDNFSEKNVLGQGGFGKVYKGVLSDSTKVAVKRLTDYESPGGDAAFQREVEMISVAVHRNLLRLIGFCTTPTERLLVYPYMQNLSVAYRLRELKPGESVLAWPTRKRVALGTARGLEYLHEH…	100	0	XP_010312629.1	PREDICTED: probable LRR receptor-like serine/threonine-protein kinase At5g10290 [Solanum lycopersicum]	74.3	0	sp|Q6K4T4|SERK4_ORYSJ	LRR receptor kinase SERK2 OS=Oryza sativa subsp. japonica GN=SERK4 PE=3 SV=1	At4g33430	474	3e-162	KOG1187	Serine/threonine protein kinase	T	Signal transduction mechanisms	K13418|1|0.0|647|smo:SELMODRAFT_444590|somatic embryogenesis receptor kinase 1 [EC:2.7.10.1 2.7.11.1]	GO:0006468//protein phosphorylation;GO:0007166//cell surface receptor signaling pathway	GO:0004675//transmembrane receptor protein serine/threonine kinase activity;GO:0004674//protein serine/threonine kinase activity;GO:0005524//ATP binding	GO:0016021//integral component of membrane;GO:0005886//plasma membrane
70	Solyc11g069490.1.1	94406.8	0.032	3	3	0.82	0.702|0.778|0.888|0.917	0.1	4	0.04632	MFWKLPVLSSCSPVEAVLDKENFTLEELLDEEEIIQECKALNSRLINFLRERTQVEQLLRYIVEEPSEDADSKRTFKFPFIACEIFTCEIDVILKTLVDDEELMNLLFSFLEPSRPHSALLAGYFSKVVICLMVRKTAALMNYVQAHHDVFQQMVDLIGITSIMEVLVRLVGADDHMYPTTMDVMQWLTESNLLEMIVDKLSPSCSPEVHANAAESLCAITRNTPSPLATKLSSPSFVARIFGHALEDSPSKSSLVHSLSVCADLDPKRSIPSSMMYSFRNQQIYESPVHVNPDTIDAMLPKLSGLLELLNVSSDEKVLPTTYGELRPPLGKHRLKVVEFISVLLKTGNEVAERELISSGTIERVLNLFFEYPYNNALHHHVESIIYSCLESKTNTIVD…	100	0	XP_010313413.1	PREDICTED: serine/threonine-protein phosphatase 6 regulatory subunit 3-like isoform X2 [Solanum lycopersicum]	-	-	-	-	At2g28360	940	0	KOG2073	SAP family cell cycle dependent phosphatase-associated protein	D	Cell cycle control, cell division, chromosome partitioning	K15501|1|0.0|1667|sly:101260507|serine/threonine-protein phosphatase 6 regulatory subunit 3	-	-	-
71	Solyc09g065620.2.1	34008.7	0.055	1	1	0.83	0.845|0.856|0.827|0.808	0.021	4	0.0007325	MHGNWQSKHRERHIKMGVSSIFEVGNETIDTINVKSSSSLPCSLLVFSPTKKAPYPVLLFFHGFMLQPSWYKSLLQHISSHRYIIVAPQFPLMNQEVKTVQKIAEWLINNLKSVLPEKVQPDLEKVAISGHSKGGNTAFAVALDSSMPLKFSALLGIDPVAGCSPSCLRPPYVLEYIPRIFNQSIPVAVIGAGLSNQSTCCLLPSGAPNGVNHAEFFNESKPPCYYFLAKDYGHADMLQADGIMAILIRIMMKSGKGSKKSMRRAVGGIVVAFLKAYLEGQIDDLNEIVKSPNLAPIILDPVISIKD	100	0	XP_004247197.1	PREDICTED: chlorophyllase-2, chloroplastic isoform X1 [Solanum lycopersicum]	46.51	8e-68	sp|Q9M7I7|CLH2_ARATH	Chlorophyllase-2, chloroplastic OS=Arabidopsis thaliana GN=CLH2 PE=1 SV=1	-	-	-	-	-	-	-	K08099|1|0.0|631|sly:101265579|chlorophyllase [EC:3.1.1.14]	GO:0015996//chlorophyll catabolic process	GO:0047746//chlorophyllase activity	-
72	Solyc01g034020.2.1	35401.3	0.114	1	1	0.83	0.791|0.854|0.822|0.844	0.028	4	0.001544	MDSVGNLDEKIGLLMQCKPLSEQAVRGLCEKAKEILVQESNVQPVKSPVTICGDIHGQFHDLAELFRIGGKCPDTNYLFMGDYVDRGYYSVETVSLLVALKVRYPQRITILRGNHESRQITQVYGFYDECLRKYGNANVWKTFTDLFDYFPLTALVESEIFCLHGGLSPTIETLDDIRNFDRVQEVPHEGAMCDLLWSDPDDRCGWGISPRGAGYTFGQDISEQFNHTNNLNLIARAHQLVMEGFNWAHDQKVVTIFSAPNYCYRCGNMASILEVDDAKDRTFIQFEPAPRRGEPDVTRRTPDYFL	100	0	XP_004228954.1	PREDICTED: serine/threonine-protein phosphatase PP2A catalytic subunit [Solanum lycopersicum]	95.39	0	sp|Q9XGH7|PP2A_TOBAC	Serine/threonine-protein phosphatase PP2A catalytic subunit OS=Nicotiana tabacum PE=2 SV=1	At2g42500	595	0	KOG0371	Serine/threonine protein phosphatase 2A, catalytic subunit	T	Signal transduction mechanisms	K04382|1|0.0|642|spen:107007911|serine/threonine-protein phosphatase 2A catalytic subunit [EC:3.1.3.16]		GO:0046872//metal ion binding;GO:0004721//phosphoprotein phosphatase activity	GO:0005737//cytoplasm
73	Solyc11g006620.1.1	75263.5	0.032	1	1	0.83	0.785|0.850|0.839|0.850	0.031	4	0.002295	MGILPRNRGGEGGMVVVDMLSERATMMRESVQKSQSITDNMVSILGSFDHRLSALETAMRPTQIRTHAIRKAHENIDRTLKAADVILSQFDLSRQAEAKILKGPHEDLESYLEAIEQLRNNIRFFNNNKSFKSSDGVLNNANSLLAKAISKLEDEFKQLLSSYSKPVEPERLFECLPTSMRPSTGSPGDQDSSSKNHLPSSHGEHNHGTDDTVYTPPALIPPRILPLLHDLSQQMVQAGHQQQLVKIYREVRFPVLEESLRKLGVEKLSKDDVQKMQWEVLEFKIGNWIHYMRIAVKLLFAAERKVCDQMFEGFEQIKDQCFADVTTGSVAMLLSFGDAIAKSKRSPEKLFVLLDMYEIMRELHTEIELLFRGKSCNEIRESAFGLSKRLAQTAQETFR…	100	0	XP_004249947.1	PREDICTED: exocyst complex component EXO70A1-like [Solanum lycopersicum]	79.16	0	sp|Q9LZD3|E70A1_ARATH	Exocyst complex component EXO70A1 OS=Arabidopsis thaliana GN=EXO70A1 PE=1 SV=1	At5g03540	1018	0	KOG2344	Exocyst component protein and related proteins	U	Intracellular trafficking, secretion, and vesicular transport	K07195|1|0.0|1370|sly:101261477|exocyst complex component 7	GO:0006887//exocytosis		GO:0000145//exocyst
74	Solyc09g010440.2.1	16208.1	0.165	1	1	0.83	0.860|0.824|0.848|0.775	0.038	4	0.003688	MANAASGMAVHDDCKLRFLELKAKRTHRFIVFKIEEKQKQVVVEKVGEPAQGYEDFTACLPDNECRYAVYDFDFVTAENCQKSRIFFIAWSPDTSRVRSKMIYASTKERFKRELDGIQVELQATDPTEMGLDVIKSRAN	100	3e-101	XP_004246462.1	PREDICTED: actin-depolymerizing factor 1 [Solanum lycopersicum]	89.93	8e-94	sp|Q9FVI2|ADF1_PETHY	Actin-depolymerizing factor 1 OS=Petunia hybrida GN=ADF1 PE=2 SV=1	At3g46010	258	6e-90	KOG1735	Actin depolymerizing factor	Z	Cytoskeleton	K05765|1|4e-102|291|spen:107031499|cofilin	GO:0030042//actin filament depolymerization	GO:0003779//actin binding	GO:0015629//actin cytoskeleton
75	Solyc01g081140.1.1	65070.3	0.025	1	1	0.83	0.825|0.888|0.781|0.834	0.044	4	0.005924	MGKSKSIGSSSRKLMHASSSDVQLNICGLPFSLNRELLAARSSKLDALLRENPEDDLSHLLGDIPADSETFEIVARFCHGFDINLSSENVIKVLCLAHYLGMSEIHSTNNLTKKACFYFQNDVLPSWNKSIKALRSAENILQQAADLALIDACAESIIAKVMHDPSLLGEPMRNVTTTDDDSENDENAYKPNVRRRLFVLDWKSEDLTLLPIPLYEPIIRAMVQRKVPLEYVASSLFEYLNKWVFSDTKGGEDDPLTCEKNSQRVIIEAVERLLPQERGLIPADLSQMLQSAIILDAHTECKTGLEIRIGKQLDQATVKDLLIPAQGYAKEERYDTESVKRILKNFYSNYASTDKSGLVVVAELVDNFLAEVSSDIDLKLNTFLSLAELSQAATGGTNR…	100	0	XP_004229581.1	PREDICTED: BTB/POZ domain-containing protein At5g17580 [Solanum lycopersicum]	44.28	9e-142	sp|Q9LF66|Y5758_ARATH	BTB/POZ domain-containing protein At5g17580 OS=Arabidopsis thaliana GN=At5g17580 PE=2 SV=1	-	-	-	-	-	-	-	K03063|1|3e-13|76.3|zju:107411570|26S proteasome regulatory subunit T3	-	-	-
76	Solyc01g098840.2.1	41873.6	0.031	1	2	0.83	0.873|0.798|0.869|0.781	0.048	4	0.007336	MEVRARAPGKIILAGEHAVVHGSAAVAASIDLYTYVSLRFPTPADNDERLSLQLKDVSLEFSWPVARIKEAFPNLENPIPPSSCSLETLKLIASLVDEQNIPEANIGLAAGVTAFLWLFTSIHGCKPAKAVVNSELPLGSGLGSSAAFCVALSAAILALSDSVTMDFSHQGWQVFGENQLELVNKWAFEGEKIIHGKPSGIDNTVSTYGNMIKFKSGDLTRLKTNMPLKMLITNTKVGRNTKALVASVSERTLRHPTAMASVFTAVDSISNEVAAIIQSPVPDDLAITEKEEKLAELMAMNQGLLQCMGVSHASIETVLRTTLKYKLSTKLTGAGGGGCVLTLLPTLLSGTVVDKVIADLETCGFQCLLAGIGGNGVEFSYSGIPDIGGNFS	100	0	XP_004230181.1	PREDICTED: mevalonate kinase [Solanum lycopersicum]	67.79	0	sp|P46086|KIME_ARATH	Mevalonate kinase OS=Arabidopsis thaliana GN=At5g27450 PE=2 SV=1	At5g27450	522	0	KOG1511	Mevalonate kinase MVK/ERG12	I	Lipid transport and metabolism	K00869|1|0.0|800|sly:101261961|mevalonate kinase [EC:2.7.1.36]	GO:0016126//sterol biosynthetic process;GO:0016125//sterol metabolic process;GO:0019287//isopentenyl diphosphate biosynthetic process, mevalonate pathway	GO:0004496//mevalonate kinase activity;GO:0005524//ATP binding	GO:0005737//cytoplasm;GO:0005829//cytosol
77	Solyc01g009390.2.1	40412.3	0.03	1	1	0.83	0.777|0.789|0.892|0.874	0.058	4	0.01338	MSQNGKLMPNLDQNSTKLLNLTVLQRIDPFVEEILITAAHVTLYEFNIDNSQWSRKDVEGSLFVVKRSAQPRFQFIVMNRRNTDNLVEDLLGDFEFELQLPYLLYRNSSQEVNGIWFYNSRECEEVANLFNRILSAYSKVPTKFKLPTNQSEFEELEAVPSMSVMDGPLEPSSTTSNTADVPDDRSFVNFFSNAVRIGSGPNAAVQGQSYDSAAVVLPSPRPPPAVPPSSAPAPSPSPPLSTSSTLMPTVDAPEPDTSTRRSSNLVKPSSFFGPPPSSSPLIPPVSSSVPTAPPLHSPGNLQCHYGAPLLQPFPPPNLPPSLTPTSAPSPSNGHVISRDKVREAFLMLVQDNQFIDMVYRALVNAHHT	100	0	XP_004228459.1	PREDICTED: mRNA-decapping enzyme-like protein [Solanum lycopersicum]	60.11	6e-128	sp|Q9SJF3|DCP1_ARATH	mRNA-decapping enzyme-like protein OS=Arabidopsis thaliana GN=At1g08370 PE=1 SV=2	At1g08370	371	1e-127	KOG2868	Decapping enzyme complex component DCP1	KA	Transcription;RNA processing and modification	K12611|1|0.0|739|sly:101247742|mRNA-decapping enzyme 1B [EC:3.-.-.-]	GO:0031087//deadenylation-independent decapping of nuclear-transcribed mRNA;GO:0000290//deadenylation-dependent decapping of nuclear-transcribed mRNA	GO:0030234//enzyme regulator activity;GO:0008047//enzyme activator activity;GO:0003729//mRNA binding	GO:0000932//P-body
78	Solyc05g055730.2.1	68256	0.05	1	1	0.83	0.776|0.916|0.764|0.861	0.072	4	0.02178	MKVIEKIQESVKDDRVVFSFEFFPPKTEDGVDNLFERMERMVSHNPSFCDITWGAGGSTADLTLEISNRMQNMVCVETMMHLTCTNMPVEKIDHALETIKSNGIQNVLALRGDPPHGQDKFVQVEGGFACALDLVKHMRAKYGDYFGITVAGYPEAHPDVIPANGLATLETYENELAYLKQKVDAGADLVVTQLFYDTDNFLKFVSDCRQIGITCPIVPGIMPINNYKGFLRMTGFCKTRIPAEITAALEPIKDNEEAVKAYGIHLGTEMCKKIMASGIKTLHLYTLNMEKSALAILMNLGLIEESKISRLLPWRRPTNVFRIKEDVRPIFWANRPKSYISRTIGWDEFPHGRWGNAKNPSYGALSDYQFMRARSRDKKLQEEWAIALNSVEDIYERFM…	100	0	XP_004239699.1	PREDICTED: probable methylenetetrahydrofolate reductase [Solanum lycopersicum]	82.66	0	sp|Q75HE6|MTHR_ORYSJ	Probable methylenetetrahydrofolate reductase OS=Oryza sativa subsp. japonica GN=Os03g0815200 PE=2 SV=1	At3g59970	1011	0	KOG0564	5,10-methylenetetrahydrofolate reductase	E	Amino acid transport and metabolism	K00297|1|0.0|1248|sly:101261413|methylenetetrahydrofolate reductase (NADPH) [EC:1.5.1.20]	GO:0035999//tetrahydrofolate interconversion;GO:0006555//methionine metabolic process;GO:0006730//one-carbon metabolic process	GO:0004489//methylenetetrahydrofolate reductase (NAD(P)H) activity	GO:0005829//cytosol
79	Solyc03g081300.2.1	55683.3	0.039	2	2	0.83	0.739|0.874|0.797|0.896	0.072	4	0.02208	MSTPTKSFRLSPSPSCLFPPIRTLFPSALLPCQKLAFYPQKQDKLPLHFLVPQDSTLLLLKCNALAINDSSTNSFVDSGVMLFSLFREIGFNETDTEALLDAHPVADTPFESIRTRIHSLQSLGVSGLALSRLIVKRPDVLTAVEIDGLVSFLIEGDLELAGKIKSSQIEHLFNSTEPRFLEGFETKVRLLLEFGITQDTIVHVLNNANLTKAFCLKSFEDIERMLTFLNRFGGGDLILRRPALLNYDLDAQLIPRVGFLLELSGGDETGTATVLRKLPFVVAYSVDHLKDHVEFLKSYAGLSEEEIFRIVLVYPNMFSASRKRKLHPRIDFLKQCGLSSHDIFRFLIKIGYKKNTKELAMAMGAVTRTSCKNMQEVIGVFLNYGLTFDDILEMSMKHP…	95.72	0	XP_004235022.1	PREDICTED: transcription termination factor MTERF8, chloroplastic [Solanum lycopersicum]	51.02	4e-152	sp|Q9FK23|MTEF8_ARATH	Transcription termination factor MTERF8, chloroplastic OS=Arabidopsis thaliana GN=MTERF8 PE=1 SV=1	At5g54180	443	7e-152	KOG1267	Mitochondrial transcription termination factor, mTERF	KR	Transcription;General function prediction only	K15032|1|3e-116|349|egr:104424557|mTERF domain-containing protein, mitochondrial	GO:0006355//regulation of transcription, DNA-templated	GO:0003690//double-stranded DNA binding	GO:0009508//plastid chromosome;GO:0009507//chloroplast
80	Solyc03g080180.2.1	39365.7	0.07	2	2	0.83	0.738|0.823|0.832|0.919	0.074	4	0.0235	MGSTSLTQTEDEAFLFAMQLASASVLPMVLKSAVELELLELMAKAGPGASISPAELASQLPCKNPDAPVMLDRMLRLLAAYSVLNCTLRTLPDGRVERLYSLAPVCKFLTKNADGVSVAPLLLMNQDKVLMQSWYHLKDAVLDGGIPFNKAYGMTAFEYHGTDPRFNKVFNRGMSDHTTLSIKKILEDYKGFEGLNSIVDVGGGTGATVSMIVSKYPSIKGINFDLPHVIEDAPAYPGVEHIGGDMFVSVPKADAIFMKWICHDWSDEHCLKFLKNCYEAVPANGKVIIAECLLPEVPDTSSSTKNTVHVDVIMLAHNPGGKERTEKEFEALAKGAGFNGFTKASCAYNTWIMEFTK	100	0	XP_004235028.1	PREDICTED: caffeic acid 3-O-methyltransferase [Solanum lycopersicum]	88.45	0	sp|Q9FQY8|COMT1_CAPAN	Caffeic acid 3-O-methyltransferase OS=Capsicum annuum GN=COMT PE=2 SV=2	At5g54160	565	0	KOG3178	Hydroxyindole-O-methyltransferase and related SAM-dependent methyltransferases	R	General function prediction only	K13066|1|0.0|741|sly:101251452|caffeic acid 3-O-methyltransferase [EC:2.1.1.68]	GO:0009809//lignin biosynthetic process;GO:0019438//aromatic compound biosynthetic process	GO:0008757//S-adenosylmethionine-dependent methyltransferase activity;GO:0047763//caffeate O-methyltransferase activity;GO:0008171//O-methyltransferase activity;GO:0046983//protein dimerization activity	-
81	Solyc09g008080.2.1	18235	0.082	1	1	0.83	0.822|0.942|0.754|0.799	0.08	4	0.02728	MFSSSSASSNPSLRVKIPVTGEGKLRINVKSPTSEMYTEVKESDKVKDLEKLIKKAWGDNDNYVSLYYNSIKMNSDYLLSFYNLRDGSIITVSLLAEPPHHHHHRLHHQSKSSCETKKNVKFQEETNSTSNGEINGCQSFLFHMAKMSSQFCSSIFSRH	100	1e-115	XP_004246639.1	PREDICTED: uncharacterized protein LOC101265954 [Solanum lycopersicum]	-	-	-	-	-	-	-	-	-	-	-	-	-	-	-
82	Solyc10g054680.1.1	41483.4	0.017	1	1	0.83	0.759|0.759|0.900|0.892	0.079	4	0.02761	MCNCLQSGSVLEVYVHMPGEDSGATFNKFGTIEDSGYNQGEAAYNGVDITINTTSNIPSTSNPTALNSDPSDSEDSEYSVKESNESTEESDDSEDSEILEDDQYGSDVHEELIQLRAEKRSFLRRKKRREKIPTDTKEVACGNAGADLGFDETTINSCTLEGRLGGDEPYYASSDACSFETDTDDSCLQEGEKMKLKLPNTKRKKHTIERVRFDPNIKKIVWQLGMVFESVKEFRLAVTKYAIQRGVQIEKCVNEPNRVRVRCCKVNCKWLLYASLDKKTNNFVIKTYMPVHSFQKATRNYLCNSRFIATVFKKKVIEQPNIRVFKLQELIRKKYNVHVGKTTTRRARAKILNELMGDXX	52.91	3e-121	XP_016472966.1	PREDICTED: uncharacterized protein LOC107794920 [Nicotiana tabacum]	-	-	-	-	-	-	-	-	-	-	-	K17604|1|9e-11|67.8|pxb:103949171|zinc finger SWIM domain-containing protein 3!K17086|2|4e-10|65.9|fve:101300290|transmembrane 9 superfamily member 2/4		GO:0008270//zinc ion binding;GO:0003677//DNA binding	-
83	Solyc08g082440.2.1	38987.8	0.168	2	2	0.83	0.930|0.800|0.857|0.733	0.084	4	0.03291	MSKSILVTGGAGYIGSHTVLQLLLGGYKTVVIDNLDNSSEIAVKRVKEIAGEYGSNLSFHKVDLRDKPAIEEIFRSNKFDAVIHFAGLKAVGESVEKPLMYYDNNLIGTITLLEVMAAHGCKKLVFSSSATVYGWPKVVPCTEEFPLSAANPYGRTKLFIEEICRDVQNADSEWKIILLRYFNPVGAHPSGRIGEDPRGIPNNLMPFVQQVAVGRRKELTVYGTDYGTKDGTGVRDYIHVIDLADGHIAALQKLSDPSIGCEVYNLGTGKGTSVLEMVAAFEKASGKKIPMVMSGRRPGDAEIVYAATEKAERELKWKAKYGIEEMCRDQWNWAKKNPYGYEGTPESNNCH	100	0	XP_004245510.1	PREDICTED: UDP-glucose 4-epimerase GEPI48 [Solanum lycopersicum]	82.76	0	sp|O65781|GALE2_CYATE	UDP-glucose 4-epimerase GEPI48 OS=Cyamopsis tetragonoloba PE=2 SV=1	At4g10960	599	0	KOG1371	UDP-glucose 4-epimerase/UDP-sulfoquinovose synthase	M	Cell wall/membrane/envelope biogenesis	K01784|1|0.0|728|sly:101254509|UDP-glucose 4-epimerase [EC:5.1.3.2]	GO:0006012//galactose metabolic process	GO:0003978//UDP-glucose 4-epimerase activity	-
84	Solyc05g047530.2.1	60650.5	0.019	1	4	0.83	0.813|0.738|0.948|0.809	0.088	4	0.03336	MAKFINKMTIYSILFTIIFISCSKLLSFPLNNADVVLPILPLIFYFLYANNSQITLPPGPRPVPIFGNWLQVGNDLNHRLLATMAQTYGSIFLLKLGSKNLVVISNPELANQVLHTQGVEFGSRPRNVVFDIFTGNGQDMVFTIYGDHWRKMRRIMTVPFFTNKVVHQYSDMWENEMDLVVDDLKKLKHEGIVIRRRLQLMLYNIMYRMMFDDKFESLDDPLFIEATKFNSERSRLAQSFDYNYGDFIPLLRPFLRGYLNKCKDLQTRRLAFFNNYFVEKRRKLMAENGEKHKISCAIDHIIDAQMKGEISEENVLYIVENINVAAIETTLWSMEWAIGELVNHPNVQQKIRDEISTVLKGKSVTESNLHELPYLQATINETLRLHTPIPLLVPHMNLD…	100	0	XP_004240122.1	PREDICTED: cytochrome P450 CYP73A100 [Solanum lycopersicum]	79.17	0	sp|H2DH22|C7A10_PANGI	Cytochrome P450 CYP73A100 OS=Panax ginseng PE=2 SV=1	At2g30490	638	0	KOG0156	Cytochrome P450 CYP2 subfamily	Q	Secondary metabolites biosynthesis, transport and catabolism	K00487|1|0.0|1093|sly:101262919|trans-cinnamate 4-monooxygenase [EC:1.14.13.11]	GO:0044550//secondary metabolite biosynthetic process	GO:0004497//monooxygenase activity;GO:0020037//heme binding;GO:0016709//oxidoreductase activity, acting on paired donors, with incorporation or reduction of molecular oxygen, NAD(P)H as one donor, and incorporation of one atom of oxygen;GO:0016705//oxidoreductase activity, acting on paired donors, with incorporation or reduction of molecular oxygen;GO:0005506//iron ion binding	GO:0016020//membrane;GO:0016021//integral component of membrane
85	Solyc04g049010.2.1	112105	0.013	1	1	0.83	0.751|0.921|0.740|0.890	0.093	4	0.04027	MGVPAFYRWLADRYPLSIVDMVEEEPKDDVPVDISKPNPNGMEFDNLYLDMNGIIHPCFHPEGKPAPATYNDVFNSIFDYIDHLFSLVRPRKLLYMAIDGVAPRAKMNQQRTRRFRASKDAAESEAEEKRLREEFEMEAAILVPTEKPETSDSNVITPGTPFMAVLSIALQYYIHSRLNKNAGWRFTKVILSDANVPGEGEHKIMSYIRLQRNIPGFNPNTRHCLYGLDADLIMLSLATHEVHFSILREVITPPGQQEKCFACGQVGHLAASCHGTNGNHGKDGKAVNDTPIHKKKYQFLHIWVLREYLQYDLEIYNPPFQIDFERVVDDFVFLCFFVGNDFLPHMPTLEIREGAINLLMSIYRRDFTTMGGYLTDAGEVFLDRVEHFIQAAAVYEDQI…	100	0	NP_001233774.1	ethylene insensitive 5/7 [Solanum lycopersicum]	62.72	0	sp|Q9FQ04|XRN4_ARATH	5'-3' exoribonuclease 4 OS=Arabidopsis thaliana GN=XRN4 PE=2 SV=1	At1g54490	1195	0	KOG2044	5'-3' exonuclease HKE1/RAT1	LA	Replication, recombination and repair;RNA processing and modification	K20553|1|0.0|2046|sly:100147714|5'-3' exoribonuclease 4 [EC:3.1.13.-]	GO:0000291//nuclear-transcribed mRNA catabolic process, exonucleolytic;GO:0009826//unidimensional cell growth;GO:0031087//deadenylation-independent decapping of nuclear-transcribed mRNA;GO:0001944//vasculature development;GO:0040029//regulation of gene expression, epigenetic;GO:0010587//miRNA catabolic process;GO:0070370//cellular heat acclimation;GO:0051301//cell division	GO:0004534//5'-3' exoribonuclease activity;GO:0008270//zinc ion binding;GO:0003676//nucleic acid binding;GO:0003729//mRNA binding	GO:0010494//cytoplasmic stress granule;GO:0005844//polysome;GO:0005829//cytosol;GO:0000932//P-body;GO:0005634//nucleus
86	Solyc10g078950.1.1	62760.8	0.061	2	2	0.83	0.749|0.937|0.758|0.894	0.095	4	0.04716	MLSVLRVHLPSDIPIVGCELTPYVLLRRPNKDKSVISEDVSESAPIDGYFLRYKWYRIQSDKKVAICSIHPSEQATLQCLGCVKAKIPVSKSYHCSPKCFSDAWQHHRVLHERAASAVNENGNGEEEIFGQFNSTGSGVSNASLASSQSSGSLANGNAPLYPAAITQRNGGETWFEVGRSKTYTPTADDIGHALKFECVVVDAETKLPVGPSSTILTSRVIPAPCPTPRRMFSVSGVDIPGHLDLDGRLSSSGTFTVLSYNILSDAYATNELYSYCPSWALSWAYRRQNLLREIVGYRADIVCLQEVQSNHFEEFFAPELDKHGYQALFKRKTAEVFSGSINNIDGCATFFRRDRFSHVKKYEVEFNKAAQSLTDAVVPIAQKKTALNRLVKDNVALIV…	99.821	0	XP_010312071.1	PREDICTED: carbon catabolite repressor protein 4 homolog 1 [Solanum lycopersicum]	75.71	0	sp|Q9M2F8|CCR4B_ARATH	Carbon catabolite repressor protein 4 homolog 2 OS=Arabidopsis thaliana GN=CCR4-2 PE=2 SV=2	At3g58580	880	0	KOG0620	Glucose-repressible alcohol dehydrogenase transcriptional effector CCR4 and related proteins	K	Transcription	K12603|1|0.0|1163|sly:101256818|CCR4-NOT transcription complex subunit 6 [EC:3.1.13.4]	-	-	-
87	Solyc01g098740.2.1	48534.1	0.035	1	1	0.83	0.711|0.878|0.795|0.934	0.097	4	0.04858	MEDNYSQNHHHSESQSHKNHQHNDILPSTSVLLIIVPIIIIILLIAADLIVMLKRIQSAKHNGTNNSSKSVINKNNCMFVAHSTIDIHLSPDVKGGCLPGHGGNSGRMPETKLRGVQVFTYKQLEMSTDKFSEANVIGNGGYGVVYRGVLIDGTVAAIKVLQREGKQWERSFRLEVDLLSRLHSPYLVELLGYCADQHHRLLIFDYMPNGSLQQHLHNAHKQSTNSLNWGIRLRIALDCARALEYLHEHTTPSVIHRDFKCSNVLLDQNFRAKVSDFGLAKIGSDKLNGLISTRVLGTTGYLAPEYASTGKLTTKSDVYSYGVVLLELLTGRVPIDTKRPPGEHVLVSWALPRLTNREKVVEMVDPTLQGQYTKKDLIQVAAIAAMCVQTEADYRPLMT…	100	0	XP_004230174.1	PREDICTED: serine/threonine-protein kinase CDL1 [Solanum lycopersicum]	52.23	2e-101	sp|Q0WRY5|PBL7_ARATH	Probable serine/threonine-protein kinase PBL7 OS=Arabidopsis thaliana GN=PBL7 PE=1 SV=1	At1g54820	459	2e-161	KOG1187	Serine/threonine protein kinase	T	Signal transduction mechanisms	K04733|1|0.0|611|pavi:110759760|interleukin-1 receptor-associated kinase 4 [EC:2.7.11.1]	GO:0006468//protein phosphorylation;GO:0007166//cell surface receptor signaling pathway	GO:0004675//transmembrane receptor protein serine/threonine kinase activity;GO:0004674//protein serine/threonine kinase activity;GO:0005524//ATP binding	GO:0016021//integral component of membrane;GO:0005886//plasma membrane
88	Solyc11g056620.1.1	48142.2	0.016	1	1	1.21	1.238|1.123|1.290|1.185	0.072	4	0.007939	MPMERSNSSGSTNSSYSTTSRSSSSLLVLSIQCLKGSSKGDEWTGNMLITGDIVEELRIGNMIVRSPFKNGKSGIQKIMHNSFKAKETSIIVRVRRGSQSDDELFTELQACIVPNEFGGRKTYMLRAIDDPNYAVGFVDRTEMECLELQVVIIFYFRFLRNELMLFGCGSCGPSGGEMICPEKEISGETASCTVSAGSLSDLSNLANASLYGFEDYHGVDIGVVRAVRLWFSPLGGEIPIDIIIKENDVKLGFAISRTEEGFIHISSVAEGDEDAPSSRSGLSNLYKEARKECKLLVVSRISNQKVLPWIIAPTGAVRCFDTADSQKLSLHRHAKVPILMHVFLWDRAVPVPNGGMINRSRTISPTMLPSLPPEVRLTRQPNDNQVMPLPLEVEDEIGS…	73.333	0	XP_006364247.1	PREDICTED: uncharacterized protein LOC102583273 [Solanum tuberosum]	-	-	-	-	-	-	-	-	-	-	-	K03495|1|1e-74|243|mdm:103410433|tRNA uridine 5-carboxymethylaminomethyl modification enzyme	-	-	-
89	Solyc02g065360.2.1	58444.2	0.023	1	1	1.21	1.393|1.217|1.159|1.086	0.131	4	0.037	MQSNLYPSTHTRCCFSWNPDKPQIPTPKILKHKLKTSIISPGVSTSLKTSLNFGEEKCNKQQEETTLPFYLPVSVRKSDSHSRYIWDGKDLKLVSVDGNAFSISDFDSNFEDTVHKLVRICVSAIRNFFLPREVSRNYLEYVKWKFVHRVSSSALQVLATQAMLRAIGIGNSRSLPLAAALNWVLKDGLGRLCRCIYTASLASSFDTNLKRVRFCTSVLFSLSIGVELLTPVFPQYFLMLASIANIAKQADACYLATSTAVHRSFAIADNLGEVSAKGQIQTVCFDNLGLTLAATLNILSANNPRLQAGLPFVMYPVFSVLDLFGIYQGLKHVHLQTLTKDRLNIIISTWIQQGFVPSPEEVSKQEGIGLSWSRGREPWSIRIGCLNPRRCTAKLSVMT…	100	0	XP_004233418.1	PREDICTED: protein root UVB sensitive 4 [Solanum lycopersicum]	58.13	0	sp|Q67YT8|RUS4_ARATH	Protein root UVB sensitive 4 OS=Arabidopsis thaliana GN=RUS4 PE=2 SV=1	At2g23470	202	2e-59	KOG4249	Uncharacterized conserved protein	S	Function unknown	-	-	-	-
90	Solyc04g064930.2.1	28627.6	0.165	4	8	1.22	1.301|1.136|1.280|1.152	0.085	4	0.0115	MVVIPTVTGLSTGAHLLSVPRTIATASRASPSSLPSLCYLKKSYYSPQRRSILPARKLVIRAARTESKGMSLGFRAPNFELTEPLTDKVWNLDDFEAYPALLVMFICNHCPFVIHLKKDIVKLSNFYMKKGLAVVAISSNSVVTHPQDGPEFMAEDAKFFKYPFPYLYDESQEVARDFVAVCTPEFFLFKKDGRRPFELVYHGQFDDSRPSNNMPVTGRDLSLAIDCVLSGQPVSSTQKPSIGCSIKWNPGGKQ	100	0	XP_004237747.1	PREDICTED: uncharacterized protein LOC101266329 isoform X1 [Solanum lycopersicum]	-	-	-	-	-	-	-	-	-	-	-	-	GO:0045454//cell redox homeostasis	GO:0016209//antioxidant activity;GO:0016491//oxidoreductase activity	GO:0005623//cell
91	Solyc08g078860.2.1	13534.9	0.064	1	1	1.22	1.307|1.134|1.283|1.151	0.089	4	0.01266	MAGRLSNVATRIMGGNGVVARSLASSLRTRAGMGLPVGKHIVPDKPLHVNDELTWDNGTPFPEPCIDRIADTVGKYEALAWLCGGLSCFVGIGLLAVWNDKASKIPFTPKVYPYDNLRVELGGEP	100	7e-88	XP_004245753.1	PREDICTED: NADH dehydrogenase [ubiquinone] 1 beta subcomplex subunit 8, mitochondrial [Solanum lycopersicum]	88	1e-69	sp|Q9FGK0|NDUB8_ARATH	NADH dehydrogenase [ubiquinone] 1 beta subcomplex subunit 8, mitochondrial OS=Arabidopsis thaliana GN=At5g47570 PE=2 SV=1	-	-	-	-	-	-	-	-			GO:0016021//integral component of membrane;GO:0005747//mitochondrial respiratory chain complex I
92	Solyc08g068330.2.1	49805.7	0.051	1	1	1.22	1.383|1.182|1.209|1.088	0.123	4	0.031	MHTQQSPSPSADRRLSVLARHLEPSSVAVEGHSNHSIVGAPTSGNDGKQSVFSHIVRAPEDPILGVTVAYNKDTSPMKLNLGVGAYRTEEGKPLVLNVVRQAEQLLVNDRSRIKEYLPITGLADFNKLSAKLILGADSPAIQENRVTTVQCLSGTGSLRVGGEFLAQHYHQRTIYIPQPTWGNHTKIFALAGLSVKSYRYYDPATRGLHFQGLLEDLGSAPSGAIVLLHACAHNPTGVDPTKDQWEQIRRLMRSKGLLPFFDSAYQGFASGSLDTDAQSVRMFVADGGEVLVAQSYAKNMGLYGERVGALSIVCRNADVTSRVESQLKLVIRPMYSNPPIHGASIVATILKDRNLYHEWTLELKAMADRIIRMRQQLFDALRAKGTPGDWSHIIKQIGM…	100	0	XP_004245266.1	PREDICTED: aspartate aminotransferase, cytoplasmic [Solanum lycopersicum]	81.82	0	sp|P46644|AAT3_ARATH	Aspartate aminotransferase 3, chloroplastic OS=Arabidopsis thaliana GN=ASP3 PE=1 SV=1	At5g11520	758	0	KOG1411	Aspartate aminotransferase/Glutamic oxaloacetic transaminase AAT1/GOT2	E	Amino acid transport and metabolism	K14454|1|0.0|939|sly:101260072|aspartate aminotransferase, cytoplasmic [EC:2.6.1.1]	GO:0006520//cellular amino acid metabolic process;GO:0009058//biosynthetic process;GO:0006979//response to oxidative stress	GO:0020037//heme binding;GO:0080130//L-phenylalanine:2-oxoglutarate aminotransferase activity;GO:0004069//L-aspartate:2-oxoglutarate aminotransferase activity;GO:0030170//pyridoxal phosphate binding;GO:0004096//catalase activity	-
93	Solyc02g070540.2.1	43094.2	0.02	1	2	1.22	1.092|1.133|1.297|1.361	0.129	4	0.03426	MEIASSSTKFKWVTAFLLLLACSAAGQVQDGPLVNGNFETPPSGGFSSGDGFSDGPSEIPSWKSNGTVELVESGQKQGGMILIVPQGRHAVRLGNDAEISQELKVEKGSIYSITFSAARTCAQLESLNVSVPPASQTIDLQTLYSVQGWDSYAWAFQAEEDDVRVVFTNPGMEDDPTCGPIIDDIAIKKLFVPDKSKGNAVVNGDFEEGPWMFRNASLGVLLPTNLDEETSSLPGWIVESNRAVRYIDTYHFTVPEGKRAIELLSGKEGIISQMVETKPNKPYRLTFLFGHAGDSCKEPLAIMAFAGDQAQNIHYTPNFNSSFQNANLNFTAKADRTRIAFYSIYYNTRSDDMSSLCGPVVDDVRVELSGSSRVKVFGFGFMFWLLVFVFC	100	0	NP_001316144.1	carbohydrate binding domain-containing protein precursor [Solanum lycopersicum]	-	-	-	-	-	-	-	-	-	-	-	-	-	-	-
94	Solyc02g063170.2.1	27348.2	0.045	1	1	1.22	1.413|1.163|1.230|1.078	0.142	4	0.04221	MYFSSSSHVSLKMNCWAPALASKVPLNTRRNQTASPALRQMKSDLLSQRIGGFGTNLSSGGSSLGGSRIITQLNLQRTLSRRKSPMVSACWVPSSEVASTAFTVGTAAVLPFYTVMVVAPKAELTRKAMKSSIPYIVLGLLYAYLLYLSWTPDTIRLMFASKYWLPELSGIAKMFSNEVTLASAWIHLLAIDLFAARQVYHDGLQNDIETRHSVSLCLLFCPVGILTHCITKALTSSPEKKQHRTH	100	0	XP_004233491.1	PREDICTED: protein ABA DEFICIENT 4, chloroplastic-like isoform X1 [Solanum lycopersicum]	58.88	1e-86	sp|Q8LFP9|ABA4_ARATH	Protein ABA DEFICIENT 4, chloroplastic OS=Arabidopsis thaliana GN=ABA4 PE=2 SV=1	-	-	-	-	-	-	-	-			GO:0016021//integral component of membrane
95	Solyc00g047200.1.1	8731.52	0.169	1	3	1.23	1.292|1.254|1.197|1.186	0.05	4	0.001921	MYVRSSSFRPIHQGIFWLLLADCLLLGWIGCQPVEAPFVTIGQISPLVFFLFFAITPILGRVGRGIPNSYTDETDHT	100	8e-48	CAA41343.1	apocytochrome b (mitochondrion) [Solanum tuberosum]	97.4	1e-40	sp|P29757|CYB_SOLTU	Cytochrome b OS=Solanum tuberosum GN=MT-CYB PE=1 SV=4	AtMi019	159	3e-49	KOG4663	Cytochrome b	C	Energy production and conversion	K00412|1|2e-49|159|bna:111216111|ubiquinol-cytochrome c reductase cytochrome b subunit	GO:0006122//mitochondrial electron transport, ubiquinol to cytochrome c	GO:0008121//ubiquinol-cytochrome-c reductase activity;GO:0046872//metal ion binding	GO:0045275//respiratory chain complex III;GO:0005739//mitochondrion;GO:0005743//mitochondrial inner membrane
96	Solyc08g067030.2.1	40998	0.429	14	40	1.23	1.295|1.270|1.173|1.176	0.063	4	0.004121	MKSSIKVLLLLVLLCAISSISIAVIDGLLKNGNFEMPPSKADLNGTEVLKHNAIPEWSISGFVEYIKAGQKQGDMLLVVPEGYAAVRLGNEASIKQILNVTKGMYYSLTFSAARTCAQEERINVSVTPDFGVLPIQTLYSSSGWDSYAWAFQAEFPQVEILLHNPGVEEDPACGPLIDSIAIRTLYPPRATNQNLLKNGDFEEGPYVFPNTSWGVLVPPNIEDDHSPLPAWMVESLKAVKYLDSDHFSVPHGKRAIELVAGKESAIAQVARTTIGKMYQLSFKVGDASNACEGSMIVEAFAGRDTLKVPYESMGKGGYKRAILRFKATASRTRIMFLSTYYHTRSDDFVSLCGPVVDDVTLLSVRTHRRVL	100	0	XP_004245192.1	PREDICTED: uncharacterized protein LOC101262737 [Solanum lycopersicum]	-	-	-	-	-	-	-	-	-	-	-	K03097|1|5e-13|71.6|aip:107623262|casein kinase II subunit alpha [EC:2.7.11.1]	-	-	-
97	Solyc09g011630.2.1	25056.8	0.05	1	1	1.23	1.212|1.324|1.126|1.254	0.083	4	0.009137	MAGVKLLGADSPFSRRVEWALKIKGVEYEFVEEDLHNKSPVLLELNPIHKKIPVLIHNGKPICESMVIVEYIDETFEGPSILPKDPYDRAIARFWAKFFDDKCMPVMGKAIFGSGEESNKAKEELGDLIKILENELKDKNFFVGDKFGFADMAGNLMAYWMGIVEEASGNIFVTSEKFPIFCNWRNEYVNCSTIKEYLPPRDEILAHFKARFAAAQK	100	5e-160	NP_001234086.1	uncharacterized LOC543814 [Solanum lycopersicum]	71.23	4e-111	sp|Q03662|GSTX1_TOBAC	Probable glutathione S-transferase OS=Nicotiana tabacum PE=2 SV=1	At3g09270	224	6e-74	KOG0406	Glutathione S-transferase	O	Posttranslational modification, protein turnover, chaperones	K00799|1|7e-161|446|sly:543814|glutathione S-transferase [EC:2.5.1.18]	GO:0009407//toxin catabolic process;GO:0006749//glutathione metabolic process	GO:0016740//transferase activity;GO:0004364//glutathione transferase activity	GO:0005737//cytoplasm
98	Solyc03g119360.2.1	22049.9	0.513	2	4	1.23	1.171|1.048|1.338|1.346	0.143	4	0.04527	MYTSKQKIHKDKDAEPSEFEVSVGQALFDLENTNQELKSELKDLYINSAVQIDVSGNRKAVVIHVPYRLRKAFRKVHVRLVRELEKKFSGKDVIFIATRRIVRPPKRGSAAQRPRTRTLTSVHDAMLEDLVVPAEIVGKRTRYRVDGSKIMKVYLDPKERNNTEYKLETFSAVYRKLSGKDVVFEYPITEA	100	9e-138	XP_004235808.1	PREDICTED: 40S ribosomal protein S7 [Solanum lycopersicum]	81.05	3e-116	sp|Q9ZNS1|RS7_AVIMR	40S ribosomal protein S7 OS=Avicennia marina GN=RPS7 PE=2 SV=1	At1g48830	322	8e-114	KOG3320	40S ribosomal protein S7	J	Translation, ribosomal structure and biogenesis	K02993|1|1e-138|388|sot:102589285|small subunit ribosomal protein S7e	GO:0042274//ribosomal small subunit biogenesis;GO:0006364//rRNA processing;GO:0002181//cytoplasmic translation;GO:0006412//translation	GO:0003735//structural constituent of ribosome	GO:0032040//small-subunit processome;GO:0022627//cytosolic small ribosomal subunit;GO:0030686//90S preribosome;GO:0005840//ribosome
99	Solyc03g117020.2.1	41403.5	0.022	1	1	1.24	1.128|1.253|1.210|1.355	0.094	4	0.01176	MFLPVNFGKKTTIVFQSEVARSPKVHVEKTDLLRLLLQRGIWNVKSLLHPKPKPKSPQRPSNIIGDWKVGNCLKFHIRIGTSSELHRASAKSFIVAPSGLQQHQTLTRRKSAPPSTLNQAGASGSKRIVLKESSSESDLDLPFWQRTWFIVLLLLMAISFFGLALFLFLTLDSDYISTTPVSAASEGVQITYGSAIKLMHEKTKFRLHSHDVPYGSGSGQQSVTGFPGVDDANSYWAVRSTDSSKQGDPIKSGSIIRLQHIKTRRWLHSHLHASPISGNMEVSCFGDDKESDTGDYWRLEIEGSGKTWRQDQRIRLQHVDTGGYLHSHDKKYTRIAGGQQEVCGVKEKRPDNVWLAAEGVYFPVTEKSK	100	1e-157	XP_004235936.1	PREDICTED: stromal cell-derived factor 2-like protein [Solanum lycopersicum]	74.31	4e-122	sp|Q93ZE8|SDF2_ARATH	Stromal cell-derived factor 2-like protein OS=Arabidopsis thaliana GN=SDF2 PE=1 SV=1	At2g25110	298	1e-101	KOG3358	Uncharacterized secreted protein SDF2 (Stromal cell-derived factor 2), contains MIR domains	R	General function prediction only	-	GO:0050832//defense response to fungus;GO:0052033//pathogen-associated molecular pattern dependent induction by symbiont of host innate immune response;GO:0042742//defense response to bacterium		GO:0016020//membrane;GO:0005783//endoplasmic reticulum
100	Solyc02g077040.2.1	38665.7	0.119	4	10	1.24	1.197|1.380|1.149|1.234	0.1	4	0.01233	MASNFFLKNITVVLLLFSILSLYPFIVTSRNLKELSMLERHENWMVHHGRVYKDDIEKEHRFKTFKENVEFIESFNKNGTQRYKLAINKYADLTTEEFTTSFMGLDTSLLSQQESTATTTSFKYDSVTEVPNSMDWRKRGSVTGVKDQGVCGCCWAFSAAAAIEGAYQIANNELADSEQQLLDCSTQNKGCEGGLMTVAYDFLLQNNGGGITTETNYPYEEAQNVCKTEQPAAVTINGYEVVPSDESSLLKAVVNQPISVGIAANDEFHMYGSGIYDGSCNSRLNHAVTVIGYGTSEEDGTKYWIVKNSWGSDWGEEGYMRIARDVGVDGGHCGIAKVASFPTV	100	0	NP_001233949.2	phytophthora-inhibited protease 1 [Solanum lycopersicum]	50.73	9e-113	sp|Q9FJ47|SAG12_ARATH	Senescence-specific cysteine protease SAG12 OS=Arabidopsis thaliana GN=SAG12 PE=1 SV=1	At3g49340	344	2e-117	KOG1543	Cysteine proteinase Cathepsin L	O	Posttranslational modification, protein turnover, chaperones	K01365|1|2e-129|377|egu:105038582|cathepsin L [EC:3.4.22.15]!K13441|2|1e-127|372|sot:102595400|cysteine protease!K16292|4|9e-123|360|gmx:100800823|KDEL-tailed cysteine endopeptidase [EC:3.4.22.-]	GO:0051603//proteolysis involved in cellular protein catabolic process	GO:0004197//cysteine-type endopeptidase activity;GO:0008234//cysteine-type peptidase activity	GO:0005615//extracellular space;GO:0016021//integral component of membrane;GO:0005764//lysosome
101	Solyc07g052920.2.1	9312.9	0.205	1	1	1.24	1.409|1.280|1.168|1.120	0.129	4	0.02457	MDWKTLGGTESSEANVGPAVKKRLPKRIRQVPEYYFLPRRSLPYSIAFYGSFIAAGVGAGMLLEAWINKKVKEDGGVIWEFDK	100	6e-55	XP_004243438.1	PREDICTED: uncharacterized protein LOC101244502 isoform X2 [Solanum lycopersicum]	-	-	-	-	-	-	-	-	-	-	-	-			GO:0016021//integral component of membrane
102	Solyc06g074730.2.1	113465	0.014	1	1	1.24	1.419|1.204|1.251|1.104	0.131	4	0.02598	MSERGRGRRGGSPYGGGRGGGRTPPYGGGRGDGRTPPYGGGRGGGRTSPSDGRGRGYQSPGGRGRGTYSSGGSPSYNAPPMYHHQQQSMEVSSMTREVEQKLSLQPSTSANPPARPQPAQQSSPPVQPPVATIPAHLAGPSTSTQPPRPPPVSSKSIRPPPRPDNGKLGRKCVVRANHFLVQVADRDVHHYDVTISPEVLSKKVCRLIIQQLVNNYRLSHLGGRGLAYDGRKSAYTAGALPFTSKEFVIIFADDNGGPRREKEFKVSIKFAAKADIHHLKQFLQSRQSDVPQETIQALDVVLRTNPSAKYEVVGRSLFHHTFAGDAGLLTGGLEYWRGYYQSLRPTQMGLALNIDMSARAFYESVFVSDYVLRHLNLRDHPQVSLSDQDHSKVRKVLKG…	100	0	NP_001265878.1	Argonaute 5 [Solanum lycopersicum]	54.09	0	sp|Q9SJK3|AGO5_ARATH	Protein argonaute 5 OS=Arabidopsis thaliana GN=AGO5 PE=1 SV=2	At2g27880	1013	0	KOG1041	Translation initiation factor 2C (eIF-2C) and related proteins	J	Translation, ribosomal structure and biogenesis	K11593|1|0.0|2098|sly:101244672|eukaryotic translation initiation factor 2C	GO:0060145//viral gene silencing in virus induced gene silencing;GO:0009814//defense response, incompatible interaction;GO:0031047//gene silencing by RNA	GO:0003676//nucleic acid binding	GO:0005829//cytosol
103	Solyc09g075820.2.1	57919.5	0.033	1	5	1.24	1.442|1.258|1.144|1.110	0.15	4	0.03825	MAGGGFTTSGNGGTHFEAKITPIVIISCIMAATGGLMFGYDVGVSGGVTSMDPFLKKFFPTVYKRTKEPGLDSNYCKYDNQGLQLFTSSLYLAGLTATFFASYTTRKLGRRLTMLIAGCFFIIGVVLNAAAQDLAMLIIGRILLGCGVGFANQAVPLFLSEIAPTRIRGGLNILFQLNVTIGILFANLVNYGTAKISGGWGWRLSLGLAGFPAVLLTLGALFVVETPNSLIERGYLEEGKEVLRKIRGTDNIEPEFLELVEASRVAKQVKHPFRNLLQRKNRPQLIISVALQIFQQFTGINAIMFYAPVLFSTLGFGNSAALYSAVITGAVNVLSTVVSVYSVDKLGRRVLLLEAGVQMLLSQIIIAIILGIKVTDHSDNLSHGWGIFVVVLICTYVSA…	100	0	NP_001234785.2	hexose transporter protein [Solanum lycopersicum]	81.97	0	sp|Q94AZ2|STP13_ARATH	Sugar transport protein 13 OS=Arabidopsis thaliana GN=STP13 PE=1 SV=2	At5g26340	890	0	KOG0254	Predicted transporter (major facilitator superfamily)	R	General function prediction only	K08150|1|7e-62|214|cann:107875738|MFS transporter, SP family, solute carrier family 2 (myo-inositol transporter), member 13	GO:0008643//carbohydrate transport;GO:0046323//glucose import;GO:0035428//hexose transmembrane transport	GO:0005355//glucose transmembrane transporter activity;GO:0005351//sugar:proton symporter activity	GO:0016021//integral component of membrane
104	Solyc04g007110.2.1	38253.9	0.032	1	1	1.24	1.436|1.286|1.161|1.066	0.16	4	0.049	MPAATLLCTKTLIYGNQSAIHGRRDYNSAFGRNVKLSETSSLLGLKLKVKKSIQLGRRIPVFTTRAGGGRRGGGGVDSIIERDDKSRKLTQAILWTAEGVYVLWLFLLPYAPGDPVWAISSETVNDLVGLSLNFFFILPLLNAVGGIHLIEAPVLHPMSEGLFNFVIGWTFMFAPLLFSDRKRDRFKGSLDLLWGFQMFLTNTFLIPYMAIRLNKGDSEYPPRATSQLGSIMTRGASVVGLVGAAACLLSTFWAFYGRGDGDFGSISNRWEFLLSYLSSERLAYAFIWDICLYIIFQPWLIGDNLQNIQEDKADIVRYLRYVPVVGLVAYCLCLDLEDEN	99.706	0	XP_010319423.1	PREDICTED: uncharacterized protein LOC101257359 [Solanum lycopersicum]	-	-	-	-	-	-	-	-	-	-	-	-			GO:0016021//integral component of membrane
105	Solyc01g099630.2.1	34256.1	0.291	8	17	1.25	1.230|1.222|1.267|1.288	0.031	4	0.0003691	MGIIKGVLFSIVLINLSLVVFCGYPRRPVDVPFWKNYEPSWASHHIKFLNGGTTTDLILDRSSGAGFQSKKSYLFGHFSMKMRLVGGDSAGVVTAFYLSSNNAEHDEIDFEFLGNRTGQPYILQTNVFTGGKGNREQRIYLWFDPTKGYHSYSVLWNTYLIVIFVDDVPIRAFKNSKDLGVKFPFNQPMKIYSSLWDADDWATRGGLEKTNWANAPFTASYTSFHVDGCEAATPQEVQVCNTKGMKWWDQKAFQDLDALQYRRLRWVRQKYTVYNYCTDKARYPVPPPECTKDRDI	100	0	NP_001233858.1	probable xyloglucan endotransglucosylase/hydrolase 1 precursor [Solanum lycopersicum]	100	0	sp|Q40144|XTH1_SOLLC	Probable xyloglucan endotransglucosylase/hydrolase 1 OS=Solanum lycopersicum GN=XTH1 PE=2 SV=1	-	-	-	-	-	-	-	K08235|1|0.0|620|sly:544272|xyloglucan:xyloglucosyl transferase [EC:2.4.1.207]	GO:0042546//cell wall biogenesis;GO:0071555//cell wall organization;GO:0010411//xyloglucan metabolic process	GO:0016762//xyloglucan:xyloglucosyl transferase activity;GO:0004553//hydrolase activity, hydrolyzing O-glycosyl compounds	GO:0005618//cell wall;GO:0016021//integral component of membrane;GO:0048046//apoplast
106	Solyc06g051730.2.1	61142.8	0.017	1	1	1.25	1.272|1.165|1.320|1.262	0.065	4	0.003313	MAGRSMWRATTKLLVATTTLGGGAAAATIASSDDPAMALKLCTNVPLRLYRDSVTAATIAFDYEYSLWGLPEGSAERAKAKHEVHMRGARRLEELCFRNGGIYIKLGQHLGQLEYLVPEEYVRIMRESMLNRCPHSSYDQVHEVVKKELGGAPDEIFDEFDPIPIASASLAQVHVARTRDGQKVAVKVQHTHMTDTAAADYATVELIVNTLHRFFPSFDYRWLIAEVRESIPKELDFLVEAKNSIKCMDNFRKLSPHIADYVYAPKVYWNLSTSKLLTMEYMEAAQVNDLKSIQRLGIQPSDVVKLVSETFAQMMFKHGFVHCDPHAANLLVRPLPSGRRSIFGRRKPQLILLDHGLYKELDYNTRINYAALWKALVYSDADGIKENCVKLGAGDDLYA…	100	0	XP_004240944.1	PREDICTED: putative ABC1 protein At2g40090 [Solanum lycopersicum]	73.79	0	sp|O04212|Y2090_ARATH	Putative ABC1 protein At2g40090 OS=Arabidopsis thaliana GN=At2g40090 PE=2 SV=2	At2g40090	758	0	KOG1235	Predicted unusual protein kinase	R	General function prediction only	K08869|1|0.0|1118|sly:101254496|aarF domain-containing kinase	-	-	-
107	Solyc05g050130.2.1	31562.9	0.099	2	4	1.25	1.238|1.327|1.167|1.260	0.066	4	0.003635	MSIKYGLLYLVLVLLLLSLKLEGGGIVIYWGQNGNEGTLASTCASNNYAIVNIAFLVVFGNGQTPVLNLAGHCNPSVGGCTRLSNDIRTCQSRGIKVMLSLGGGVGSYSLSSADDARNVANYLWNNYLGGQSTSRPLGDAILDGIDFDIERGTTQHWDELARALSGFSQQRKVYLTAAPQCPFPDSWLNGALSTGLFDYVWVQFYNNPPCQYSAGSAVNLKSYWNKWTAIQAGKIFLGLPAAPGAAGSGFIPSDVLVSQVLPAINGSPKYGGVMLWSKFYDNGYSSAIKPRV	100	0	XP_004240090.1	PREDICTED: acidic endochitinase [Solanum lycopersicum]	85.86	0	sp|P29060|CHIA_TOBAC	Acidic endochitinase OS=Nicotiana tabacum PE=1 SV=1	At5g24090	388	2e-136	KOG4701	Chitinase	M	Cell wall/membrane/envelope biogenesis	K01183|1|0.0|590|sly:101253788|chitinase [EC:3.2.1.14]	GO:0005975//carbohydrate metabolic process;GO:0000272//polysaccharide catabolic process;GO:0006032//chitin catabolic process	GO:0008061//chitin binding;GO:0004553//hydrolase activity, hydrolyzing O-glycosyl compounds;GO:0004568//chitinase activity	GO:0005618//cell wall;GO:0005576//extracellular region
108	Solyc02g092800.2.1	56435.7	0.033	2	2	1.25	1.321|1.292|1.179|1.192	0.071	4	0.004593	MPLNDEEEHHQLLADRLLEEESAYEYSDKVHIIGVDDDDDFTKTPPFSWKKLWAFTGPGFLMSIAFLDPGNLEGDLQAGAIAGYSLLWLLFWATAMGLLVQLLAARLGVATSRHLAELCRDEYPKWARLLLWVMTELALIGADIQEVIGSAIAIKILSRGFLPLWSGVVITALDCFVFLFLENYGVRKLEALFAVLIAVMAVSFAWMFGETKPNGVELLVGVVVPKLSSKTIKQAVGIVGCVIMPHNVFLHSALVQSRDIDNRKIGRVREALNYYSIESTIALAISFMINLFVTTVFAKSFYGSEIANSIGLENAGQYLQDKYGGGSFPILYIWAIGLLAAGQSSTITGTYAGQFIMGGFLHMRLKKWQRALITRSCAIVPTLIVALAFDTSEKSLDVL…	100	0	NP_001233770.1	metal transporter [Solanum lycopersicum]	75.15	0	sp|Q9SNV9|NRAM3_ARATH	Metal transporter Nramp3 OS=Arabidopsis thaliana GN=NRAMP3 PE=1 SV=2	At2g23150	766	0	KOG1291	Mn2+ and Fe2+ transporters of the NRAMP family	P	Inorganic ion transport and metabolism	K21398|1|0.0|1031|sly:544257|natural resistance-associated macrophage protein 2		GO:0005215//transporter activity	GO:0016021//integral component of membrane
109	Solyc03g093360.2.1	19886.7	0.162	3	6	1.25	1.141|1.232|1.200|1.425	0.123	4	0.01936	MTSLHFLTAVAFTFFLTAHIAAAGSSEECVYTLYVRTGSIIKGGTDSKISVTLGDASGKSVWIPDLEKWGLMGPNYDYYERGNVDIFTGRGKCISTPICRLNVTSDGSGDHHGWFLDYVETTFTGPHMQCSQSIFYVDQWLASDAPPYELSVSLDGCKKKIGNHGRRFVVGKPIRSASE	100	1e-132	XP_004235174.1	PREDICTED: PLAT domain-containing protein 3-like [Solanum lycopersicum]	52.87	1e-55	sp|O65660|PLAT1_ARATH	PLAT domain-containing protein 1 OS=Arabidopsis thaliana GN=PLAT1 PE=1 SV=1	-	-	-	-	-	-	-	-	-	-	-
110	Solyc00g094530.1.1	13797.6	0.054	1	1	1.25	1.382|1.310|1.164|1.128	0.12	4	0.02045	MYIAVPAEILGIILPLLLGVAFLVLAERKVMAFVQRRKGPDVVGSFGLLQPLADGLKLILKEPISPSSANFSLFRMAPVATFMLSLVARAVVPFDYGMVLSDPNIGLLYLFAISSLGVYGIIIAGWSSN	100	7e-85	AJM70235.1	NADH dehydrogenase subunit 1, partial (mitochondrion) [Nicotiana tabacum/Hyoscyamus niger cybrid]	100	3e-84	sp|Q01300|NU1M_PETHY	NADH-ubiquinone oxidoreductase chain 1 OS=Petunia hybrida GN=ND1 PE=3 SV=1	AtMi093	218	9e-72	KOG4770	NADH dehydrogenase subunit 1	C	Energy production and conversion	K03878|1|6e-83|249|nsy:27214892|NADH-ubiquinone oxidoreductase chain 1 [EC:1.6.5.3]		GO:0008137//NADH dehydrogenase (ubiquinone) activity	GO:0016021//integral component of membrane;GO:0005739//mitochondrion;GO:0005886//plasma membrane
111	Solyc10g078720.1.1	45779	0.032	1	1	1.25	1.421|1.295|1.155|1.125	0.137	4	0.0273	MSIQNYELASDCNLEFPQMGFCFQPESSVENGCQQQQQPNFWPSTDSSSSRTIISRIGSSPSAFFATERYLGLTQYDYQDNNNSCTQLSKNLDPQTTSYTQQCGNGFSADSSARVDTDFPKISMPSFIRSQFSSSQPFGPEGLYGNPFSNLSEKERILLLKSKLFREIDSSNRQPASIPFQGNQDYGVSNNTCGFNLVHIRQQSGSQPANSFNNSGCSGGSLSSKARIRWTQDLHDRFVECVNRLGGADKATPKAILKLMDSEGLTIFHVKSHLQKYRNAKFIPESTEGRSGKTDCPNNVTQIDSKTGMQIKEALHMQLEVQRRLHEQLEIQRKLQLRIEEQGEQLKKIFEQQQQTTRSLLETRNSSISSPADQFTPHEDEVFAAESFNNTHFQSNISY…	100	0	XP_004249167.1	PREDICTED: myb family transcription factor PHL5-like [Solanum lycopersicum]	59.28	2e-71	sp|Q0WVU3|PHL5_ARATH	Myb family transcription factor PHL5 OS=Arabidopsis thaliana GN=PHL5 PE=2 SV=1	At5g58080	67	2e-11	KOG1601	GATA-4/5/6 transcription factors	K	Transcription	K12741|1|4e-29|121|rcu:8263214|heterogeneous nuclear ribonucleoprotein A1/A3!K06236|2|1e-20|98.2|cvr:CHLNCDRAFT_141917|collagen, type I, alpha!K01940|3|2e-19|94.7|smo:SELMODRAFT_405683|argininosuccinate synthase [EC:6.3.4.5]!K14491|4|7e-12|71.2|cann:107848808|two-component response regulator ARR-B family	GO:0006355//regulation of transcription, DNA-templated;GO:0006351//transcription, DNA-templated	GO:0003677//DNA binding	GO:0005634//nucleus
112	Solyc08g008260.2.1	106867	0.009	1	1	1.25	1.455|1.228|1.224|1.090	0.151	4	0.03544	MTKRSWKESMKAFGSHIDPEKEEQWKWMKIGNYSIPEQPRPFECYWRLWDNALEAKRRQYKASVRAQIYPQRGGFMWYTECQLVRKIENKVKRIAKLIKKINQGSREGNLRRRSELLQLVDEFHKQYKSLYSVYDNLRGEVKNKLNEEHEDDLSSQSSSSCSNSESYFSPEELTAKSSSSCSYYEPLDEYAILKDKVITSNIEVKGGSVESYDMENFETPMSYSRGSESGEFFKDLRIQGEEKFIDESEWFQERVKEKEDEILYLTDDFELREKERLSQMKGLEDQIASMKVELYNLCVQKREVEEQLECKSNELKQMEDSNSRLQSRVLALEATFTEVDENLLNSTSRIDDLMAKSHVLQQEVDRLNTEKHELEQKLLNETKKGSEQVKDLEDKAHSS…	100	0	XP_019070640.1	PREDICTED: intracellular protein transport protein USO1-like isoform X1 [Solanum lycopersicum]	-	-	-	-	-	-	-	-	-	-	-	K10352|1|0.0|1195|nsy:104219912|myosin heavy chain!K20478|2|7e-167|542|sind:105159034|golgin subfamily B member 1		GO:0003779//actin binding	-
113	Solyc09g009530.2.1	39946.4	0.158	1	1	1.25	1.478|1.251|1.187|1.098	0.162	4	0.03964	MTIKMIAIFGIVILALIYKAIIPPSPKICGSPNGPLITAPRIKLSDGRYLAYKENGVPRDEAKHKFVFIHGFDCVRHDVALLTTISPEVMQSLGIYIVSIDRPGYGESDPHPQRTPKTLALDIEELVDQLELGPKFYVIGFSMGGQAVWGLLKYIPHRLAGAILLTPVTNYWWGSFPANLTKQAYYEQLVQDQWTLRIAHYLPWLTYWWNTQRLFPSSSVATFSEDILFEQDRVLMPIFDSYQSKYRDLVRQQGEYESIHRDIMIGFGTWEFDPMELENPFPNGEGSVHIWQGDEDGHVPVILQRFIAKKLPWIHYHEMKGGGHMFPWAEGMGDKVMKTFLLGEPFVM	100	0	NP_001311389.1	alpha/beta-Hydrolases superfamily protein precursor [Solanum lycopersicum]	-	-	-	-	-	-	-	-	-	-	-	-		GO:0016787//hydrolase activity	-
114	Solyc05g026140.2.1	48011.6	0.021	1	1	1.25	1.198|1.052|1.445|1.300	0.166	4	0.04873	MQILDKIKMQRKESDERPPELPISWVEISNSISRQYQFQPDGKLSVKMVDDSRPAAQRVMESFLNKFFPSGYPYSVNEGYMRYTQFRALQHFTSASLSVLSTQSLLFAAGLRPTPAQATAVSWILRDGMQHVGKLICSNLGARMDSEPKRWRILADVLYDFGTGLEVMSPLCPHLFLEVAGLGNFAKGMAVVAARATRLPIYSSFAKEGNLSDLFAKGEAISTLFNVLGLGAGIHLASTICSSMQGKLVVAPLLSVIHIYSVCEEMRAAPVNTLNPQRTAMIVADFVKTGRISSPADLRYREDLLFPGRLIEDAGKVKVGRSLHEVVRPSKLKQFKEAFLEEKFLLNHGSRWTDMILEHNATGEDALRGWLVAAYASDMERLVHEPSANILQEAYDKMN…	100	0	XP_010321130.1	PREDICTED: protein root UVB sensitive 2, chloroplastic isoform X1 [Solanum lycopersicum]	73.9	0	sp|Q9SJX7|RUS2_ARATH	Protein root UVB sensitive 2, chloroplastic OS=Arabidopsis thaliana GN=RUS2 PE=1 SV=2	At2g31190	654	0	KOG4249	Uncharacterized conserved protein	S	Function unknown	-	GO:0010224//response to UV-B;GO:0009926//auxin polar transport		GO:0009941//chloroplast envelope;GO:0005739//mitochondrion
115	Solyc10g084120.1.1	30405.8	0.064	1	1	1.26	1.280|1.132|1.375|1.249	0.1	4	0.01087	MAKDMEYGNDQYAPSKDYQDPPPAPLIDPEELGKWSFYRAIIAEFIATLLFLYITVLTVIGYKSQSDGDQCGGVGILGIAWAFGGMIFVLVYCTAGISGGHINPAVTFGLLLARKVSLVRAIFYIVAQCLGAICGCGLVKLFQKAYYVKYGGGANELAVGYNIATGLGAEIIGTFVLVYTVFSATDPKRNARDSHVPVLAPLPIGFAVFMVHLATIPITGTGINPARSFGAAVIYGKNKSWDDQWIFWVGPFIGAAIAAIYHQYILRAGASKSINSFRSNA	100	0	NP_001274308.1	aquaporin PIP2-1-like [Solanum lycopersicum]	80.35	6e-166	sp|P43286|PIP21_ARATH	Aquaporin PIP2-1 OS=Arabidopsis thaliana GN=PIP2-1 PE=1 SV=1	At3g53420	461	1e-165	KOG0223	Aquaporin (major intrinsic protein family)	G	Carbohydrate transport and metabolism	K09872|1|0.0|569|sly:101247873|aquaporin PIP	GO:0034220//ion transmembrane transport	GO:0005215//transporter activity;GO:0015250//water channel activity	GO:0016021//integral component of membrane;GO:0005887//integral component of plasma membrane
116	Solyc08g008610.2.1	53012.3	0.033	1	1	1.26	1.432|1.254|1.238|1.128	0.126	4	0.01844	MAGRILNEVISFFVFTILDVLDFLLCYVYRVIDFIVEAEWKSCYCSSVKQTMMSSDTILVSESKIVCLTSSSRNKLQLEEISDTLYTRSSLVSEVSKFTMNELKRLKLENAAPIVKRGALRSTFTVNSTIVEMLQGKISGLKSNIGPRWSDCDCKTCNSWTSSSRDSLFVHIDGAKENVQENVIFIHGFISSSEFWTETLFPNFTKGTKSKYRLFAVDLLGFGRSPKPKESLYTLREHLEMIEKSVLEQYNVKSFHIVAHSLGCILALALAVKHPALVKSLTLLAPPYFPTPKGEEATQYMMRRIAPRRVWPVIAFGASLACWYEHVSRTICLLICKNHRLWEFLTKLITRNRIRTYLVDGFCCHTHNAAWHTLHNIICGTAGKIEGYLDMVKNRLKGE…	100	0	XP_004244657.1	PREDICTED: probable lysophospholipase BODYGUARD 2 [Solanum lycopersicum]	57.91	0	sp|O22977|BDG3_ARATH	Probable lysophospholipase BODYGUARD 3 OS=Arabidopsis thaliana GN=BDG3 PE=2 SV=1	At4g24140	566	0	KOG1454	Predicted hydrolase/acyltransferase (alpha/beta hydrolase superfamily)	R	General function prediction only	-		GO:0016787//hydrolase activity	GO:0016021//integral component of membrane
117	Solyc02g086880.2.1	42333.7	0.047	2	4	1.26	1.260|1.420|1.111|1.256	0.126	4	0.0197	MAMRRVASTAARAIASPSSLVFTRELQASPGPKKIVGVFYKANEYAEMNPNFLGCAENALGIREWLESKGHQYIVTPDKEGPDCELEKHIPDLHVLISTPFHPAYVTAERIKKAKNLQLLLTAGIGSDHVDLKAAAAAGLTVAEVTGSNTVSVAEDELMRILILVRNFLPGHHQVINGEWNVAAIAHRAYDLEGKTVGTVGAGRIGRLLLQRLKPFNCNLLYHDRLKMDSELENQIGAKFEEDLDKMLSKCDIVVINTPLTEKTKGMFDKERIAKLKKGVLIVNNARGAIMDTQAVVDACNSGHIAGYSGDVWYPQPAPKDHLWRYMPNQAMTPHISGTTIDAQLRYAAGTKDMLDRYFKGEDFPAENYIVKDGELAPQYR	100	0	NP_001234857.1	formate dehydrogenase [Solanum lycopersicum]	99.21	0	sp|Q07511|FDH_SOLTU	Formate dehydrogenase, mitochondrial OS=Solanum tuberosum GN=FDH1 PE=1 SV=2	At5g14780	620	0	KOG0069	Glyoxylate/hydroxypyruvate reductase (D-isomer-specific 2-hydroxy acid dehydrogenase superfamily)	C	Energy production and conversion	K00122|1|0.0|794|sly:544250|formate dehydrogenase [EC:1.17.1.9]	GO:0042183//formate catabolic process	GO:0051287//NAD binding;GO:0016616//oxidoreductase activity, acting on the CH-OH group of donors, NAD or NADP as acceptor;GO:0008863//formate dehydrogenase (NAD+) activity	GO:0005739//mitochondrion
118	Solyc01g110340.2.1	55559.2	0.022	1	1	1.26	1.327|1.383|1.110|1.203	0.123	4	0.02013	MKRNIISSKLMLLLLLLLPLLNCHGSYLDYTEALTKSILFFEGQRSGYLPQDQRMSWRGHSGLSDGWEMNVDLTGGYYDAGDNVKFNFPMAFTTTLLAWSVIEFGEIMPPAELRNGLVAIRWSTDYLLKTVSQPDRIFVQVGDPVLDHDCWERPEDMDTARTVYTVDAPNPASDVAGETAAALAAASIAFRPSDPGYAETLLRTSTRVFDFADRNRGAYSDNNNIREGVCPYYCDFDGYQDELLWGAAWLRRATQRDDYLSYIQENRQTLGADDNINEFGWDNKHAGVNVLVSKEVLDGTTYSLQSYKASADSFMCTLIPESSSSHIQYSPGGLIYKPGGSNLQHATTITFLLLVYANYLEKSSQILNCGTISVSPSMLRKIGKRQVDYILGENPKGIS…	100	0	XP_004230884.1	PREDICTED: endoglucanase 24-like [Solanum lycopersicum]	72.32	0	sp|Q93YQ7|GUN24_ARATH	Endoglucanase 24 OS=Arabidopsis thaliana GN=At4g39010 PE=2 SV=1	-	-	-	-	-	-	-	K01179|1|0.0|1031|sly:101245995|endoglucanase [EC:3.2.1.4]	GO:0030245//cellulose catabolic process	GO:0008810//cellulase activity	-
119	Solyc09g074970.2.1	28943.6	0.07	1	1	1.26	1.182|1.110|1.388|1.372	0.138	4	0.02563	MSLTSHSSTFLLPNLPADDGPALTYALVILNQSLPKFTPLLWKHAKVHICADGGANRVFDELPGMFPHEEASEIRKRYKPYAIKGDMDSIRTDVLDYYRGLGTKIIDESQDQDTTDLNKCVTYIRDSLNSEHPNLCILVTGALGGRFDHEMGNINVICCFPSMRIILLSDDSLIQLLPSKHHHKIHIQSLVEGPHCGLIPIGMVAGRTSTTGLQWNLAQNNTEMRFGGLVSTSNIVKENIVTVQSDSDLLWTISIKKD	98.837	0	XP_004247430.2	PREDICTED: thiamine pyrophosphokinase 1 isoform X1 [Solanum lycopersicum]	68.22	2e-125	sp|B9DGU7|TPK1_ARATH	Thiamine pyrophosphokinase 1 OS=Arabidopsis thaliana GN=TPK1 PE=2 SV=1	At2g44750	350	9e-123	KOG3153	Thiamine pyrophosphokinase	H	Coenzyme transport and metabolism	K00949|1|0.0|525|sly:101250050|thiamine pyrophosphokinase [EC:2.7.6.2]	GO:0009229//thiamine diphosphate biosynthetic process;GO:0006772//thiamine metabolic process	GO:0030975//thiamine binding;GO:0016301//kinase activity;GO:0004788//thiamine diphosphokinase activity;GO:0005524//ATP binding	-
120	Solyc05g014280.2.1	25751.1	0.05	1	1	1.26	1.354|1.426|1.089|1.169	0.157	4	0.03718	MAHCLSRFPISQPILFSNNPKYSNSSLPISSRKYQGNYKKLKVMVVDERHNLDHLQRQNKTPQPRKRTPQMAPVGLWDRFPTARTVQQMMDTMDRVIEDPLAFNGGPSTDDIGYRRGRTPWEIKENEGEYKMRFDMPGMTKEDVKVWLEEKMLVVKGEKMVKNNEKEEEWSAKSYGKYNTRIALPENIDFEKIKAEVKDGVLYITIPKASSNPKVFDINVQ	100	2e-165	NP_001234217.1	small heat shock protein [Solanum lycopersicum]	40.76	3e-47	sp|P09886|HS21C_PEA	Small heat shock protein, chloroplastic OS=Pisum sativum GN=HSP21 PE=2 SV=1	At4g27670	149	1e-44	KOG0710	Molecular chaperone (small heat-shock protein Hsp26/Hsp42)	O	Posttranslational modification, protein turnover, chaperones	K13993|1|2e-166|460|sly:543846|HSP20 family protein	-	-	-
121	Solyc08g074270.2.1	66521.5	0.023	1	1	1.27	1.200|1.217|1.296|1.353	0.071	4	0.003534	MIKQPFLLTKFTPFSSKSKHTLFTFHCNFSIKMASLTARTTPTVQNVPGLTPEEMERVCEQTFQRYESGGLGKRKGKGVAIVWFRNDLRVLDNEALLRAWVSSEAILPVYCVDPRLFGTTHYFGMPKTGALRAQFIIECLNDLKRNLVKRGLDLLIQHGKPEDIVPSLAKAYKAHTVYAHKETCSEEVKVEKMVTRNLQKLVSPSSGGIGNDPGSGNTTKLELVWGSTMYHIDDLPFDCESLPDVYTQFRKSVEYKSKVRNCTKLPTSFGPPPEVGDWGHVPQVSELGLQQEKVSKGMNFVGGESAALGRVHDYFWKKDLLKVYKETRNGMLGADYSTKFSPWLASGSLSPRFIYEEVKRYEKERLSNDSTYWVLFELIWRDYFRFLSIKLANLLFQAG…	100	0	NP_001296304.1	cryptochrome DASH, chloroplastic/mitochondrial [Solanum lycopersicum]	100	0	sp|Q38JU2|CRYD_SOLLC	Cryptochrome DASH, chloroplastic/mitochondrial OS=Solanum lycopersicum GN=CRYD PE=2 SV=2	At5g24850	764	0	KOG0133	Deoxyribodipyrimidine photolyase/cryptochrome	LT	Replication, recombination and repair;Signal transduction mechanisms	K01669|1|0.0|1208|sly:101248230|deoxyribodipyrimidine photo-lyase [EC:4.1.99.3]	GO:0006281//DNA repair;GO:0018298//protein-chromophore linkage	GO:0003913//DNA photolyase activity;GO:0003677//DNA binding	GO:0005739//mitochondrion;GO:0009507//chloroplast
122	Solyc05g007710.2.1	38949.4	0.015	1	1	1.27	1.158|1.299|1.228|1.392	0.1	4	0.009246	MGRFDKEGLKKGPWTPEEDQKLLSFIDTYGCGSWRALPAKAGLQRCGKSCRLRWINYLRPDIKRGKFSLQEERTIIQLHALLGNRWSAIATYLPSRTDNEIKNYWNSRLKKRLTKMGIDPMTHKPNGAGSSKYVANLSHMAEWESARLEAEARLVRKSKILFNNNNNSHNYNINPSTISQQLPYYQQLPCLDRLKAWQIASTKLPTINDISHAILRNNSKNKKLDSSIPSSSLNSSENIFANNAPTTTKVDDDDHQNLQNLSTINSCFEDDQLLQTELPSFMQEFSGVFPEYAQNSTNGLQVDNFMGSYSEDFEDNKLLINWNNFPNYLVNSPIDCIN	100	0	XP_004239393.1	PREDICTED: transcription factor MYB51-like [Solanum lycopersicum]	69	1e-90	sp|Q9LE63|MY106_ARATH	Transcription factor MYB106 OS=Arabidopsis thaliana GN=MYB106 PE=2 SV=1	At3g01140	275	2e-90	KOG0048	Transcription factor, Myb superfamily	K	Transcription	K09422|1|0.0|701|sly:101263026|transcription factor MYB, plant	GO:0030154//cell differentiation;GO:0006357//regulation of transcription from RNA polymerase II promoter	GO:0043565//sequence-specific DNA binding;GO:0044212//transcription regulatory region DNA binding;GO:0001135//transcription factor activity, RNA polymerase II transcription factor recruiting;GO:0003677//DNA binding;GO:0000981//RNA polymerase II transcription factor activity, sequence-specific DNA binding	GO:0005634//nucleus
123	Solyc02g072530.1.1	54056.1	0.033	1	1	1.27	1.336|1.427|1.105|1.211	0.141	4	0.02498	MAGIATAGDTSTSTSSNLAPTRSLSKKENQGLLLGRYEIGKLLGHGTFAKVYHARNVKTNESVAIKVIDKEKILKVGLIDHIKREISILKRVRHPNIVELYEVMATKAKIFFVMEYVKGGELFNKVAKGRLKEEVARKYFQQLISAVAFCHARGVYHRDLKPENILLDEDGNVKVSDFGLSAISEQIKQDGLFHTFCGTPAYVAPEVLGRKGYDAAKVDIWSCGVILFVLMAGYLPFHDQNIMAMYKKIYRGEFRCPRWFSPELTRFLKRLLDINPETRITVQEIMNNRWFKKGFKHVKFYIEDDKLCSINDDEYGGIDYSSDRSESESEIEIRRRSASLPRPASLNAFDIISFSRGFDLSGLFEEGGDGARFVSGAPVPKIINKLEEIAKVVSFAVRK…	100	0	XP_004233044.1	PREDICTED: CBL-interacting serine/threonine-protein kinase 12-like [Solanum lycopersicum]	77.92	0	sp|Q9SN43|CIPKC_ARATH	CBL-interacting serine/threonine-protein kinase 12 OS=Arabidopsis thaliana GN=CIPK12 PE=1 SV=1	At4g18700	746	0	KOG0583	Serine/threonine protein kinase	T	Signal transduction mechanisms	K07198|1|0.0|981|sly:101248263|5'-AMP-activated protein kinase, catalytic alpha subunit [EC:2.7.11.11]	GO:0018107//peptidyl-threonine phosphorylation;GO:0018105//peptidyl-serine phosphorylation;GO:0007165//signal transduction;GO:0035556//intracellular signal transduction	GO:0004674//protein serine/threonine kinase activity;GO:0005524//ATP binding	GO:0016021//integral component of membrane;GO:0005622//intracellular
124	Solyc04g009920.2.1	60983.3	0.066	1	1	1.27	1.186|1.074|1.462|1.353	0.172	4	0.04337	MRISFLRFGVLFLLCNCLIGAYCSKSDEAYVTLLYGDEFLLGVRVLGKSIRDTGSTKDMVVLVSDGVSQYAKHLLQADGWIVEKADLANPNQVRPKRFWGVYTKLKIFNMTTYKKVVYLDADTIVVKSIEDLFKCGKFCANLKHSERLNSGVMVVEPSEKVFNDMMSKVTTLPSYTGGDQGFLNSYYVGFANAQVYEPNLPSDVLNSRKVPEMERLSTLYNADVGLYMLANKWMVDEKELRVIHYTLGPLKPWDWWTSWLLKPVDVWQNVRVQLQESLPGTRGGKNSRDELLVKFLYLLPLLLIAFCYYRSFLQTQSLWHHIRQMYYKVRGGVLAYASVPPSAISSNQQFPNGMQLKMPTYLGAVSVCVCFAAALVSLGLPLLIIPRQVMPWTGLLLMY…	100	0	XP_004236792.1	PREDICTED: inositol phosphorylceramide glucuronosyltransferase 1-like isoform X1 [Solanum lycopersicum]	66.67	0	sp|Q8GWB7|GUX6_ARATH	Inositol phosphorylceramide glucuronosyltransferase 1 OS=Arabidopsis thaliana GN=IPUT1 PE=1 SV=1	At5g18480_1	624	0	KOG1950	Glycosyl transferase, family 8 - glycogenin	G	Carbohydrate transport and metabolism	K00750|1|1e-78|247|lja:Lj0g3v0036679.1|glycogenin [EC:2.4.1.186]!K20890|5|1e-30|130|crb:CARUB_v10019986mg|xylan alpha-glucuronosyltransferase [EC:2.4.1.-]		GO:0016757//transferase activity, transferring glycosyl groups	GO:0016021//integral component of membrane
125	Solyc07g056150.2.1	23385.8	0.467	1	2	1.28	1.131|1.411|1.137|1.423	0.163	4	0.03463	MVYTLPLGLIRSTDILGVGKSCLLLQFTDKRFQPVHDLTIGVEFGARMITIDNKPIKLQIWDTAGQESFRSITRSYYRGAAGALLVYDITRRETFNHLASWLEDARQHANANMTIMLIGNKCDLAHRRAVSTEEGEQFAKENGLIFMEASAKTAQNVEEAFIRTASTIYKKIQDGVFDVSNESYGIKVGYGGIPGPSGGRDGAASQGGGCCT	100	9e-146	XP_004243219.1	PREDICTED: ras-related protein RABB1c-like [Solanum lycopersicum]	97.44	2e-144	sp|P92963|RAB1C_ARATH	Ras-related protein RABB1c OS=Arabidopsis thaliana GN=RABB1C PE=1 SV=1	At4g17170	400	5e-144	KOG0098	GTPase Rab2, small G protein superfamily	U	Intracellular trafficking, secretion, and vesicular transport	K07877|1|1e-146|410|sot:102600913|Ras-related protein Rab-2A	GO:0030100//regulation of endocytosis	GO:0005525//GTP binding;GO:0003924//GTPase activity	GO:0005768//endosome;GO:0000139//Golgi membrane
126	Solyc06g067910.2.1	41256.1	0.04	2	2	1.29	1.267|1.225|1.339|1.339	0.056	4	0.001353	MKKAAAILLVLLFATVANSSQKDGLLSNGNFELGPKPSQMKGTKVVDRHAIPNWEISGYVEYIKSGQTQGDMLLPVPQGDYAVRLGEDASIKTKVKVTKGIFYSISFVFARTCAQEEKLNVSVSPNSEPNDWGMLPLQTMYSSEGWDSYSWGFLAEADEIDIVIHNPAVEKDPACGPLIDFVALKALKTPKRPRGNMLKNGNFEEGPYIFPNTTWGVLIPPNIEDDHSPLLGWMIESLKAVKYIDSEHFHVPQGKRAVELVAGRESAIAQVVRTRPGKIYDLLFSIGDASNSCEGSMLVEAFAGKITMQFPYESKGKGGFKRARLRFTAISPRTRVRFLSTYYHMKSDNSGSLCGPVVDDVRLVGLRNPHLP	100	0	XP_004241713.1	PREDICTED: uncharacterized protein LOC101268115 [Solanum lycopersicum]	-	-	-	-	-	-	-	-	-	-	-	K03097|1|3e-11|66.2|aip:107632886|casein kinase II subunit alpha [EC:2.7.11.1]	-	-	-
127	Solyc09g097770.2.1	10237	0.17	1	1	1.29	1.408|1.379|1.169|1.209	0.12	4	0.01231	MGSKAILFLGLFLAIFLMISSEVAARELAAETTNAVKLDNENAVNVDHYYGKGYGKRKKCYSCCKKYKYGCKKYCCSYEEYVAAQTQN	100	4e-58	NP_001234188.1	tyrosine- and lysine-rich protein precursor [Solanum lycopersicum]	46.85	3e-16	sp|P23137|GRP1_TOBAC	Glycine-rich protein OS=Nicotiana tabacum GN=GRP PE=2 SV=1	-	-	-	-	-	-	-	K03006|1|1e-08|53.9|sot:107063215|DNA-directed RNA polymerase II subunit RPB1 [EC:2.7.7.6]	-	-	-
128	Solyc12g017570.1.1	50123.2	0.34	1	2	1.29	1.348|1.114|1.463|1.230	0.15	4	0.02416	MDEEYDVIVLGTGLKECILSGLLSVDGLKVLHMDRNDYYGGESTSLNLVQLWKRFRGSDKPPAQLGSSRDYNVDMIPKFIMANGALVRVLIHTDVTKYLYFKAVDGSFVYNKGKVHKVPATDMEALKSPLMGIFEKRRARKFFIYVQDYKESDPKTHEGMDLTRVTARELIAKYGLDDNTVDFIGHALALHRDDRYLDKPALDTVKRMKLYAESLARFQGGSPYIYPLYGLGELPQAFARLSAVYGGTYMLNKPECKVEFDEEGKVCGVTSEGETAKCKKVVCDPSYLNNKVRKVGKVARAIAIMSHPIPNTNDSHSVQIILPQKQLGRKSDLYLFCCSYTHNVAPKGKFIAFVSTEAETDNPESELKPGIDLLGQVDEIFFEAYDRFEPVNEPSLDNC…	100	0	XP_004251972.1	PREDICTED: guanosine nucleotide diphosphate dissociation inhibitor 2 [Solanum lycopersicum]	84.91	0	sp|O24653|GDI2_ARATH	Guanosine nucleotide diphosphate dissociation inhibitor 2 OS=Arabidopsis thaliana GN=GDI2 PE=2 SV=1	At3g59920	797	0	KOG1439	RAB proteins geranylgeranyltransferase component A (RAB escort protein)	O	Posttranslational modification, protein turnover, chaperones	K17255|1|0.0|919|spen:107007447|Rab GDP dissociation inhibitor	GO:0015031//protein transport;GO:0007264//small GTPase mediated signal transduction	GO:0005093//Rab GDP-dissociation inhibitor activity	GO:0005622//intracellular
129	Solyc03g096030.2.1	55296.2	0.04	1	1	1.29	1.146|1.411|1.168|1.446	0.158	4	0.02615	MYSSLRSRKTPLFFSSNLLKMKHNARKNNHFSIFVVVFSIFLFGCFMYNEDVKTIAEFPFSMTRNQDIYTPPLNQQNGVQEIETKVVMNSRTEQETEQEKEKIEIPAEEEEEEESIELPPEDCDLFTGQWVYDNVTHPVYKEPECEFLTAQVTCMRNGREDSMYQNWRWQPRDCSLPKFKAKLLLEKLRNKRLMFVGDSLNRNQWESMICLVQSAVPSGRKSLNKTGSLSVFRIEDYNATVEFYWAPFLVESNSDDPNMHSILNRIIMPESIEKHGKNWKNVDYLVFNTYIWWMNTFAMKVLRGSFDEGATEYDEIERPVAYRRVLTTWSQWVENNVDVNSTKVFFMSMSPLHIKSLDWNNPDGIKCAKETTPVLNTSMPLSVGTDKRLFVVAANVTQS…	100	0	XP_004235241.1	PREDICTED: protein ESKIMO 1 [Solanum lycopersicum]	73.51	0	sp|Q9LY46|TBL29_ARATH	Protein ESKIMO 1 OS=Arabidopsis thaliana GN=ESK1 PE=1 SV=1	-	-	-	-	-	-	-	K16573|1|1e-26|118|pda:103722329|gamma-tubulin complex component 6	GO:0071554//cell wall organization or biogenesis;GO:0050826//response to freezing	GO:0016413//O-acetyltransferase activity	GO:0005794//Golgi apparatus;GO:0016021//integral component of membrane
130	Solyc02g065090.2.1	45686	0.033	1	1	1.3	1.317|1.423|1.172|1.284	0.103	4	0.007459	MGRIFVAALTLLVTLQVLHIPIAFAATTGKKITILSIDGGGIRGIIPGTILAFLESKLQELDGPNARIADYFDVVAGTSTGGLIATMLTAPNKDNRPLYAAKNITNFYMDHGPKIFPESSRTSFLKRLANIFGGPKYDGKYLRTLVRSILGNLTVTQTLTQLVIPSFDIKRLQAVVFTTSDAKAHVSKNALLSDVCLSTSAAPTYFPVHYFETRDSQGKTRTFDLVDGGVAANNPTLVAITQTSKEMMLGKLQNAGLKPMDCKKMLVLSLGTGIAKDEKKYSAAAASTWGVLGWLYNNGASPLLDVYGDASSDIVDVHLSTIFQSLDSQNNYLRIQDDSLSGEAASMDVATKKNMEALVQIGNDRLKKGVSRVNLDTGRYEEVSGEGTNEEALIRFAKL…	100	0	XP_004233432.1	PREDICTED: patatin-like protein 1 [Solanum lycopersicum]	55.84	6e-156	sp|B8AQW7|PLP1_ORYSI	Patatin-like protein 1 OS=Oryza sativa subsp. indica GN=PLP1 PE=3 SV=1	At2g26560	420	3e-145	KOG0513	Ca2+-independent phospholipase A2	I	Lipid transport and metabolism	K16815|1|4e-09|63.2|gsl:Gasu_03780|calcium-independent phospholipase A2-gamma	GO:0016042//lipid catabolic process	GO:0016787//hydrolase activity;GO:0004620//phospholipase activity;GO:0047372//acylglycerol lipase activity	GO:0005737//cytoplasm;GO:0016020//membrane
131	Solyc07g063160.2.1	15300.9	0.104	1	1	1.3	1.395|1.161|1.412|1.243	0.121	4	0.01155	MEKRICGSVPIDVKRSKEFVHINLFINPLFSEKKKKKKKTNLKPSLRMGGASSQLGDGVSKENTSTTTSSSQLPKDEKLAPATVPADSKPKKKICCACPETKKVRDECIVEHGESACEKWIEAHLKCLRAEGFNV	96.739	6e-59	XP_015081062.1	PREDICTED: cytochrome c oxidase copper chaperone 2-like [Solanum pennellii]	79.63	1e-26	sp|Q9LJQ9|CX171_ARATH	Cytochrome c oxidase copper chaperone 1 OS=Arabidopsis thaliana GN=COX17-1 PE=2 SV=1	At1g53030	92.4	2e-25	KOG3496	Cytochrome c oxidase assembly protein/Cu2+ chaperone COX17	O	Posttranslational modification, protein turnover, chaperones	K02260|1|8e-60|182|spen:107024590|cytochrome c oxidase assembly protein subunit 17	GO:0006825//copper ion transport	GO:0016531//copper chaperone activity	GO:0005758//mitochondrial intermembrane space
132	Solyc04g015400.2.1	44581.8	0.022	1	1	1.3	1.429|1.136|1.405|1.225	0.142	4	0.01873	MEAAAVSVVDKLKSFSKSTQDFASGVVRNREGSNPIEILKRLQREAFSDIMKLRDRQEKLERVLAFCKSSKGSPFQESSTLVRGEFDAVGALLMIGTIDNSKRNAIERAIRTGIDSRLTFETTIREKDTLVAEFVGSERGQMDILGSPLSLAKVLYAAHISDWCSAVAIPVGGLCRDVAVPTSSREERGLTDYSSFGPPLLNQLNGSGIAVTVKKSNTVSSLAQFVSALPRDGSLLYCFGTFGQVVCQLSSNTKLSILGIHKMANLSRPQPELAAMSLPFSFLQRSGHPDAAIVENSVLDGYLAMTLESEVYESTKIGGWVEMKRSNPKYLQWAVTMSDTSVDDFGWSLSLGGLLGGPRKWDHFQVESSLNFNVGKKCKLQPGLLYVIDGATQFPALMF…	100	0	XP_004236630.1	PREDICTED: uncharacterized protein LOC109118702 [Solanum lycopersicum]	-	-	-	-	-	-	-	-	-	-	-	-	-	-	-
133	Solyc02g089350.2.1	13441.4	0.08	1	2	1.3	1.139|1.163|1.412|1.497	0.179	4	0.0331	MAGKMSIVLFVLLVVFLTQNQVSRANIMRDEQQQQQRNNQLYGVSEGRLHPQDCQPKCTYRCSKTSYKKPCMFFCQKCCAKCLCVPAGTYGNKQSCPCYNNWKTKRGGPKCP	100	2e-78	NP_001296306.1	protein GAST1 precursor [Solanum lycopersicum]	100	1e-80	sp|P27057|GAST1_SOLLC	Protein GAST1 OS=Solanum lycopersicum GN=GAST1 PE=2 SV=1	-	-	-	-	-	-	-	K03860|1|1e-39|143|nnu:104608881|phosphatidylinositol glycan, class Q			GO:0005576//extracellular region
134	Solyc03g007920.2.1	32880	0.021	1	1	1.31	1.276|1.203|1.398|1.347	0.085	4	0.003927	MSLLIRRFVVVGLIVLLSFAVLSEAEASYGAYKVEVINEFPHDPEAYTEGLLYAENDTLFESTGLYGRSSVRKVALLNGKVETVHDMQASDFGEGLALLGESLFQLTWLQDTGFIYDRYNFSKFKKFTHHMQDGWGLATDGKVLFGSDGTSTLYKIDPKTMKVIRKQVVKSQGHEVHYLNELEYVKEEVWSNVYATDCIARISPKDGTVIGWILLQSLREDLKSRGYKYIEVLNGIAWDRDGDRIFVTGKLWPKIFEIKLLPLPPSAPLIREIKNLCMPTPFYLGNLES	100	0	XP_004234220.1	PREDICTED: glutaminyl-peptide cyclotransferase-like [Solanum lycopersicum]	64.71	5e-114	sp|Q84WV9|QPCT_ARATH	Glutaminyl-peptide cyclotransferase OS=Arabidopsis thaliana GN=QCT PE=1 SV=1	-	-	-	-	-	-	-	-	GO:0017186//peptidyl-pyroglutamic acid biosynthetic process, using glutaminyl-peptide cyclotransferase	GO:0016603//glutaminyl-peptide cyclotransferase activity	GO:0005886//plasma membrane
135	Solyc03g007240.2.1	39788	0.059	2	2	1.31	1.180|1.118|1.487|1.443	0.185	4	0.03557	MDGKENNGVNGSNKVGIPKCCLKARVFDPELEANCHSTVVSGWFSQPPTSFDGKEKVLYFNNPMWPGEAHSLKVEKVLFKGKSEFQEVLVFESASYGKVLVLDGIVQLTEKDECAYQEMIAHLPLCSIKSPKKVLVVGGGDGGVLREISRHSSVELIDICEIDKMVIDVSKKYFPDLAIGFEDPRVNLHVGDAVEFLKNTPEGKYDAIIVDSSDPVGPAIELVEGPFFAKIARALRPGGVLCNMAESMWLHTHLIQDMISICRETFSSVHYAWASVPTYPSGVIGFLLCSTEGPFVDFKHPVNPIEKLEGALQHQRELKFYNSEMHEAAFALPCFLRREVSGLRDSPRSAGSGVKI	100	0	NP_001234407.1	SPM1 protein [Solanum lycopersicum]	80.4	0	sp|Q94BN2|SPSY_ARATH	Spermine synthase OS=Arabidopsis thaliana GN=SPMS PE=1 SV=1	At5g53120	519	0	KOG1562	Spermidine synthase	E	Amino acid transport and metabolism	K00797|1|0.0|732|sly:543894|spermidine synthase [EC:2.5.1.16]	GO:0006596//polyamine biosynthetic process	GO:0016740//transferase activity;GO:0004766//spermidine synthase activity	-
136	Solyc01g111560.2.1	21913.5	0.152	2	2	1.32	1.379|1.264|1.354|1.268	0.059	4	0.00117	MSASRFIKCVTVGDGAVGKTCLLISYTSNTFPTDYVPTVFDNFSANVVVDGSTVNLGLWDTAGQEDYNRLRPLSYRGADVFILAFSLISKASYENVSKKWIPELRHYAPGVPIILVGTKLDLREDKQFFVDHPGAVPLSTAQGEELRKSIGAAAYIECSAKTQQNIKAVFDAAIKVVLQPPKQKKKKKRKGQKACSIL	100	7e-146	XP_004231040.1	PREDICTED: rac-like GTP-binding protein 5 [Solanum lycopersicum]	91.41	1e-129	sp|Q38912|RAC3_ARATH	Rac-like GTP-binding protein ARAC3 OS=Arabidopsis thaliana GN=ARAC3 PE=1 SV=1	At4g35020	362	2e-129	KOG0393	Ras-related small GTPase, Rho type	R	General function prediction only	K04392|1|1e-146|409|sot:102598995|Ras-related C3 botulinum toxin substrate 1	GO:0010928//regulation of auxin mediated signaling pathway;GO:0009958//positive gravitropism;GO:0007264//small GTPase mediated signal transduction	GO:0003924//GTPase activity;GO:0019003//GDP binding;GO:0005525//GTP binding	GO:0005737//cytoplasm;GO:0005819//spindle;GO:0005730//nucleolus;GO:0030427//site of polarized growth;GO:0016020//membrane;GO:0005622//intracellular;GO:0005886//plasma membrane
137	Solyc06g060960.1.1	117237	0.021	1	1	1.33	1.177|1.400|1.245|1.498	0.146	4	0.01439	MASVSKDGLSNKSVKKRLLENGCHSSYLGIIPKYKIRKVSAVRDFPPGCGRTSLKVDLNHVQNAEVSTNIEDMTNIILVDGVKETNIEVKSQSVEVVNDLINLENQENVDRLAGEVMATNMSAIANGVGEKISDEKSTGFELPKDLKTSEMELSKETEDIQNDTSVKEVDEQGLPLVESINGGHMTQKLISVMEHTSTSPKNKYRKRRVSAVRDFPPFCGTKVPKSTEQNCFGVTEESKDVAGFGKAVTRNEVIETLREVTETGALPEKLIGSEDADSLKDRDVSSPKDRQLEQITMVRTEEQEGVQCDYDGRSQVERTVVMPEIMTKKGSDAGPVGKETLVYSENEREKLTSASSALGSGNEKQITKGAKPSGARKQGKQKSLDDPVSGNEIVVSQVE…	100	0	XP_004241982.1	PREDICTED: uncharacterized protein LOC101247436 [Solanum lycopersicum]	62.43	0	sp|O82175|SUVH5_ARATH	Histone-lysine N-methyltransferase, H3 lysine-9 specific SUVH5 OS=Arabidopsis thaliana GN=SUVH5 PE=1 SV=1	At2g22740_2	390	2e-127	KOG1082	Histone H3 (Lys9) methyltransferase SUV39H1/Clr4, required for transcriptional silencing	BK	Chromatin structure and dynamics;Transcription	K11420|1|0.0|2175|sly:101247436|euchromatic histone-lysine N-methyltransferase [EC:2.1.1.43]		GO:0018024//histone-lysine N-methyltransferase activity;GO:0008270//zinc ion binding	GO:0005634//nucleus;GO:0005694//chromosome
138	Solyc07g049180.2.1	68996.9	0.04	2	2	1.34	1.474|1.302|1.340|1.255	0.094	4	0.003404	MFESRPRSVLSLGVFVILVYLSSVPLPVNSQCNRGCDLALASFYVWRGSNLTLISEMFSTSIADIVSYNNRDNIPNQDSVIAGTRINIPFRCDCLNDGEVLGHAFPYRVKSGDTYDLVARNYSDLTTAQWMMKFNSYPENNIPNTVNLSVVVNCSCGNSDVSKDFGLFVTYPVRAEDNLTSVASAANVSEDIIRRYNPAAVSILDIGQGIIYIPGRDRNGNFPPLPTSTDGLSGGAKAGISIGAIGVVLLLAGLVYVGCYRNKTRKADLRSEDHLHQYGHGPEGSTTVKAADSGRLADGNSPVLSGITVDKSVEFTYEELATATNDFSIANKIGQGGFGAVYYAELRGEKAAIKKMDMEATREFLAELKVLTNVHHLNLVRLIGYCVEGSLFLVYEYVE…	100	0	NP_001233773.1	LysM receptor-like kinase isoform 1 precursor [Solanum lycopersicum]	58.43	0	sp|Q6UD73|LYK3_MEDTR	LysM domain receptor-like kinase 3 OS=Medicago truncatula GN=LYK3 PE=1 SV=1	At3g24550	248	6e-73	KOG1187	Serine/threonine protein kinase	T	Signal transduction mechanisms	K13429|1|0.0|1135|sly:100736514|chitin elicitor receptor kinase 1	GO:0006468//protein phosphorylation;GO:0007166//cell surface receptor signaling pathway	GO:0004675//transmembrane receptor protein serine/threonine kinase activity;GO:0004674//protein serine/threonine kinase activity;GO:0005524//ATP binding	GO:0016021//integral component of membrane;GO:0005886//plasma membrane
139	Solyc07g022880.2.1	16198.2	0.083	1	1	1.34	1.167|1.539|1.140|1.506	0.214	4	0.03943	MASDGDEFVKGHVHRNNVTILTLDRPKALNAMNLDMDIKYKSFLDEWETDPMVKCALVESSSLRAFSAGMDIKGVVAEIQKDKFTPLVQKVFAAEYSPICKISNYRKPYISFMDGITMGFGIGLSGHGIYRLITERTVLAMPEN	94.444	2e-94	XP_015082761.1	PREDICTED: 3-hydroxyisobutyryl-CoA hydrolase-like protein 3, mitochondrial [Solanum pennellii]	77.78	4e-77	sp|Q9LK08|HIBC7_ARATH	3-hydroxyisobutyryl-CoA hydrolase-like protein 4, mitochondrial OS=Arabidopsis thaliana GN=At3g24360 PE=2 SV=1	At3g24360	234	3e-77	KOG1684	Enoyl-CoA hydratase	I	Lipid transport and metabolism	K05605|1|3e-95|283|spen:107026342|3-hydroxyisobutyryl-CoA hydrolase [EC:3.1.2.4]		GO:0003860//3-hydroxyisobutyryl-CoA hydrolase activity	-
140	Solyc04g079230.2.1	7732.12	0.132	1	1	1.35	1.582|1.239|1.387|1.189	0.176	4	0.01952	MLTAPNKENRPLFAAKDIKPFYLEHGPNIFPQNNMILIGSIIKGWKFLTGPKYNGKYLHQVIGEIRGD	88.235	6e-37	NP_001274813.1	patatin-like protein 1 [Solanum tuberosum]	54.41	1e-20	sp|Q6ZJD3|PLP2_ORYSJ	Patatin-like protein 2 OS=Oryza sativa subsp. japonica GN=PLP2 PE=3 SV=1	At2g26560	80.5	2e-19	KOG0513	Ca2+-independent phospholipase A2	I	Lipid transport and metabolism	-	GO:0009737//response to abscisic acid;GO:0016042//lipid catabolic process	GO:0016787//hydrolase activity;GO:0004620//phospholipase activity;GO:0047372//acylglycerol lipase activity	GO:0005737//cytoplasm;GO:0016020//membrane
141	Solyc06g006000.2.1	19564.3	0.053	1	1	1.35	1.632|1.395|1.272|1.110	0.22	4	0.03661	MEVNGNIRPNRSDVHLSKEEETKIEEETREYFDGIAPKRHTKPQRSDYSSTYVDHINLYPSSHDTIPENLEFQRLENDPQKLVYNGSQVTEEFIETEYYKDLNCIDKQHHTTGTGFIKVENNENTFNIGADYTTDPSHVYKGNPATNDWIPSAVDEVNFISGKPHRSDN	100	1e-123	XP_004240397.1	PREDICTED: uncharacterized protein LOC101264428 [Solanum lycopersicum]	-	-	-	-	-	-	-	-	-	-	-	-	-	-	-
142	Solyc07g040890.1.1	37078.9	0.018	1	2	1.35	1.546|1.542|1.137|1.179	0.224	4	0.04001	MPNQNNETMPIDPNVDPYGYLGMVHNSDGSITRLHEPPVPVDTSNDLSHLVFTKDISISSSKNTWARIILPRELLHSTTSTPKLPLVIYFHGGGFIVATVDSPSFQRFYASIASEIPAVVVSIEYRQAPEHRLPAAYDDCMEALHWIKTKPDELLSNHADFSKCFLMGTSAGGNVVYHVGLRAAESWDNLKPLVIKGLILNQPFFGGNKRTQSEVRLANDKVLPPIISDIMWDLGLPEGADRDHEYSNPMVGIESKPNLLDQVKLLGWKMLVTGCDGDPLIDRQVDLVKVLKELDVQVEGSFTQGFYHGSEIIDPLKTKEFSLLVKELISNF	100	0	XP_010324041.1	PREDICTED: probable carboxylesterase 120 [Solanum lycopersicum]	51.4	2e-108	sp|Q9LVB8|CXE20_ARATH	Probable carboxylesterase 120 OS=Arabidopsis thaliana GN=CXE20 PE=2 SV=1	At5g62180	319	4e-108	KOG1515	Arylacetamide deacetylase	V	Defense mechanisms	K14493|1|2e-51|178|smo:SELMODRAFT_450797|gibberellin receptor GID1 [EC:3.-.-.-]	GO:0009056//catabolic process;GO:0008152//metabolic process	GO:0016787//hydrolase activity	-
143	Solyc01g013940.1.1	10478.4	0.129	1	3	1.36	1.448|1.590|1.116|1.267	0.207	4	0.03171	MNASPIKSKGSSTTNSYWQNILDLENLINSKVPTSARTGNVAALSFKKWNRMDIDFIYAPILRHFIVNANNLVNVRYLEITATLQVSRPFAAC	68.293	6e-11	ADT80932.1	dicer-like protein, partial [Nicotiana attenuata]	-	-	-	-	-	-	-	-	-	-	-	K11592|1|2e-11|62.8|nto:104116694|endoribonuclease Dicer [EC:3.1.26.-]	GO:0006396//RNA processing;GO:0031047//gene silencing by RNA	GO:0004525//ribonuclease III activity;GO:0003723//RNA binding;GO:0005524//ATP binding	-
144	Solyc03g025950.2.1	24661.2	0.286	2	3	1.38	1.420|1.199|1.531|1.369	0.138	4	0.008374	MAVELWETLKDSITAYTGLAPTTFFTLVALALAFYYVVSELFGSPDNRHQQRPRDFEEQKPLPPPVQLGEISGEELKQYDGSDSKKPLLMAIKGQIYDVSQSRMFYGPGGPYALFAGKDASRALAKMSFEEKDLTGDISGLGPFELEALQDWEYKFMSKYVKVGTVKQTVPVSDGAANDESVESTDPETKPAEAVASESAKPSEDGPSGSSVAEIVDKSDGDVDKKD	100	8e-164	XP_004234379.1	PREDICTED: membrane steroid-binding protein 2-like [Solanum lycopersicum]	68.63	1e-92	sp|Q9M2Z4|MSBP2_ARATH	Membrane steroid-binding protein 2 OS=Arabidopsis thaliana GN=MSBP2 PE=1 SV=1	At3g48890	271	3e-92	KOG1110	Putative steroid membrane receptor Hpr6.6/25-Dx	R	General function prediction only	K17278|1|1e-164|457|sly:101246317|membrane-associated progesterone receptor component		GO:0020037//heme binding;GO:0019904//protein domain specific binding	GO:0009535//chloroplast thylakoid membrane;GO:0005783//endoplasmic reticulum;GO:0005634//nucleus;GO:0016020//membrane;GO:0012505//endomembrane system;GO:0016021//integral component of membrane
145	Solyc01g006290.2.1	36348.1	0.309	6	14	1.42	1.552|1.427|1.409|1.304	0.102	4	0.00223	MSFLRFILAIFFLVSINFGVSNAHYKLTPTFYDCTCPNVIHIVRDVMEQIQRRDVRAGAKIIRLHFHDCFVNGCDGSILLNNATGIISEKDANPNVGAGGFDIVDEIKTALENECPGVVSCADILALASEIGVVLAGGPSWQVPLGRRDSLTANRSGANSDIPSPTETLAVMIPQFTRKGMDLTDLVALSGAHTFGRARCRTFNQRLFNFSGSGRPDPTIDSNYLKTLQRLCPQGGNGGTFANLDKSTPDEFDNYYFTNLKNHQGLLQTDQELFSTSGSSTISIVTNYANNQHKFFDDFVCSMIKLGNISPLTGTNGEIRKDCKRIN	100	0	XP_004228671.1	PREDICTED: lignin-forming anionic peroxidase [Solanum lycopersicum]	78.66	0	sp|P11965|PERX_TOBAC	Lignin-forming anionic peroxidase OS=Nicotiana tabacum PE=2 SV=1	-	-	-	-	-	-	-	K00430|1|0.0|675|sly:101261260|peroxidase [EC:1.11.1.7]	GO:0006979//response to oxidative stress;GO:0042744//hydrogen peroxide catabolic process	GO:0020037//heme binding;GO:0046872//metal ion binding;GO:0004601//peroxidase activity	GO:0005576//extracellular region
146	Solyc07g041870.2.1	98992.4	0.012	1	1	1.42	1.577|1.200|1.604|1.291	0.203	4	0.01806	MNKLQSLDDFVKVHGVLLAAAGIPQSLYKLLFQKLSSDTFDGGHYLQIEPIEDGRQRRLLSTSGFIAKHSNLFLVDHAWTFRLSDAYKQLCEVPGLAERMAALMCVDVDLDSATEQEGEEDSSKLSAVEIVEREMCKVKEGQDYTRWLELEELDVDDHMLVSLDLPSKFPNLLALSLCGNNLSDVEVVSKEVTRLNNLKALWLNNNPVLENSNSEAAIIQGCPSLEICNSKFTSNYGEWALGFCGGIYDKDNADCAHQRDHPLETVTSLDLSNRSIRNLMNKAFNPEEITSLSYLNLRGNPLDQNCLSDLFQLLKRFSCLHSLEVDIPGPLGESAAEIVEALPNLSLLNGVNTSKIMESGKSVVDSMLQPRFPKWTAGEPLTDRVINAMWLYLMTYRLA…	100	0	XP_004243709.1	PREDICTED: tubulin--tyrosine ligase-like protein 12 [Solanum lycopersicum]	-	-	-	-	At1g77550	1112	0	KOG2155	Tubulin-tyrosine ligase-related protein	O	Posttranslational modification, protein turnover, chaperones	K16609|1|0.0|1792|sly:101252792|tubulin--tyrosine ligase-like protein 12	GO:0006464//cellular protein modification process	GO:0003824//catalytic activity;GO:0016874//ligase activity;GO:0005524//ATP binding	GO:0009507//chloroplast
147	Solyc03g117300.2.1	61472.4	0.036	1	1	1.45	1.818|1.607|1.220|1.148	0.318	4	0.049	MAVLKEGSRPPWVGLAAAVWVQIAAGSAYTFPLYSPALKSVLGFSQQQLTIIGVANDIGENVGILPGIACNKFPPWVILLFGLCLSFFGYGVLWLAVSQTVLSLPYWVLWLALVVATNSSAWMGTAVLVTNMRNFPLSRGTVAGILKGYIGLSAAVFTEIFAMVLNDSASDLLLFLTLGIPIICLAMMYFIRACTPASGEDSSEHIHFLFTQAASLLLAIYLLTTTILKNILSLNSSISYILVGVMVILLMSPLAIPLKMTIFPSRHKRPGKLDGSSNDLTEEEVSFSQTMSLLTPISSEADLGSFREGEDISEVDMLLAVGEGAVKKKRKPRRGEDFKFREAIIKADFWLLWFAYFFGVGSGVTVLNNLAQIGVALGVNDTTILLSLFSFCNFLGRLG…	100	0	XP_004235913.1	PREDICTED: protein NUCLEAR FUSION DEFECTIVE 4 [Solanum lycopersicum]	29.72	9e-55	sp|F4I9E1|NFD4_ARATH	Protein NUCLEAR FUSION DEFECTIVE 4 OS=Arabidopsis thaliana GN=NFD4 PE=3 SV=1	-	-	-	-	-	-	-	K14794|1|4e-72|255|aly:ARALYDRAFT_321151|ribosomal RNA-processing protein 12	GO:0080167//response to karrikin		GO:0005634//nucleus;GO:0016021//integral component of membrane
148	Solyc05g014790.2.1	103978	0.016	1	1	1.47	1.431|1.252|1.656|1.538	0.172	4	0.007832	MFTAVQSRSTPVSSEIQHVFSIRRRKISQICRYNRSCFKVKAVIQSGNDNKTVKDANFMEKSMEESNRLLVSSGKARDVKAVVTLRKKMKEKISDKIEDQWESLMNGIGKGILIQLISQDIDPVTKSGKFAESYVRGWLSKPSDHPHIVEYAANLTVPHDFGRPGAIIITNLLDKEIHLVQIVVHGFNEGPVFFSVNTWIHSQKDNPESRIIFQNQAYLPSQTPPGIKDLRREDLLSIRGNGKGERKLHERIYDYDVYNDLGNPDKSEDLARPLLGGKEKPYPRRCRTGRGPTKKDPLAERRIEKPHPVYVPRDETFEEIKQNTFSAGRLKALLHNLVPLIAATLSSSDIPFTNFTDIDKLYKDGVVLNDDNDPQKNNFLSEMLEKVFSVSKRLLKYEI…	100	0	XP_004239193.1	PREDICTED: lipoxygenase 6, chloroplastic [Solanum lycopersicum]	60.39	0	sp|Q9CAG3|LOX6_ARATH	Lipoxygenase 6, chloroplastic OS=Arabidopsis thaliana GN=LOX6 PE=2 SV=1	-	-	-	-	-	-	-	K00454|1|0.0|1892|sly:101263024|lipoxygenase [EC:1.13.11.12]	GO:0034440//lipid oxidation;GO:0031408//oxylipin biosynthetic process;GO:0009611//response to wounding;GO:0009695//jasmonic acid biosynthetic process	GO:0016702//oxidoreductase activity, acting on single donors with incorporation of molecular oxygen, incorporation of two atoms of oxygen;GO:0016165//linoleate 13S-lipoxygenase activity;GO:0046872//metal ion binding	GO:0005886//plasma membrane;GO:0009507//chloroplast
149	Solyc10g075090.1.1	12754.1	0.281	1	3	1.48	1.459|1.231|1.705|1.534	0.197	4	0.01073	MEMFGKIACFVVFCMVVVAPHAESLSCGEVTSGLAPCLPYLEGRGPLGGCCGGVKGLLGAAKTPEDRKTACTCLKSAANSIKGIDTGKAAGLPGVCGVNIPYKISPSTDCSTYGSSKVDES	100	6e-75	NP_001233953.1	non-specific lipid-transfer protein 2 precursor [Solanum lycopersicum]	100	3e-77	sp|P93224|NLTP2_SOLLC	Non-specific lipid-transfer protein 2 OS=Solanum lycopersicum GN=LE16 PE=2 SV=1	-	-	-	-	-	-	-	-	GO:0006869//lipid transport	GO:0008289//lipid binding	GO:0016020//membrane
150	Solyc03g097120.2.1	54320	0.02	1	1	1.58	1.648|1.835|1.297|1.521	0.226	4	0.008811	MDGVHEATVAGNLTSPPFLNKTYDMVDDPSTDSVVSWSKSNNSFVVLNVPEFARDILPKYFKHNNFSSFVRQLNTYGFRKVDPDRWEFANEGFLRGYKHLLKSISRRKPSQLQGHQQTTSKVPNASVASCVEVGKFGIEEEVERLKRDKDVLMQELVKLRQQQQETDHQLVTVGQRVQLMESRQQQMMSFLAKAMQSPGFVAQLVHQQNGNNRHITGLNKKRRLPEQAEENVACKPVNALQDGQVVRYQPSMTEAAKALLQQILRINASGRLDNRLHTNGGCLTNNPLPPNNSLGSSGASSCISSVTLSEVLSTSSQPNLISDSGFPFNSCSSIISETQSTTTVVPGEANIPILPEADALNSQAVHDLPEFSHTLGVTDVNMPETGNVPDMDTTKCILD…	100	0	XP_004235322.1	PREDICTED: heat stress transcription factor A-1 [Solanum lycopersicum]	50.31	3e-147	sp|Q84T61|HSFA1_ORYSJ	Heat stress transcription factor A-1 OS=Oryza sativa subsp. japonica GN=HSFA1 PE=2 SV=1	At5g16820	380	4e-128	KOG0627	Heat shock transcription factor	K	Transcription	K09419|1|0.0|1016|sly:101259923|heat shock transcription factor, other eukaryote		GO:0003700//DNA binding transcription factor activity;GO:0043565//sequence-specific DNA binding	GO:0005634//nucleus
151	Solyc09g060110.2.1	101860	0.006	1	1	1.6	2.023|1.514|1.611|1.234	0.327	4	0.02126	MELHWWYYSWFLLSSIFIKVAFCDPEGFLSLSCGGNTTYVDSSNITWTPDGAYISAGNMTTVDFIEGSSSSTLPIRFFPDSPRRKCYKIPVKNVSSLVLVRTQFVYKNYDGHNKPPAFSVSLGRAITTNVNLTHTDPWIEEFIWRVDKDILSLCFHSLQGGGFPVISSLELRPLPQEAYSNALGDFPDKLLRKCYRINCGYNWPLRYPIDQYDRIWDGDEDFSPFHVSSGFDIQANFNVSVLKEGPPVAVLQTGRVLARWNDMTYKFPIDHQGDYHIVLYFAGILPVSPSFDVLINEDIVQSNYTVNRWEVSSLFFTMKGIESLNITLKTVHYYPYINALEVYEILDIPLETSSTTVSALQVIQQSTGLDLDWEDDPCSPKSWEHIECEANLVTSLEFF…	100	0	XP_004247083.1	PREDICTED: probable LRR receptor-like serine/threonine-protein kinase At5g48740 [Solanum lycopersicum]	64.05	0	sp|C0LGV0|Y5487_ARATH	Probable LRR receptor-like serine/threonine-protein kinase At5g48740 OS=Arabidopsis thaliana GN=At5g48740 PE=2 SV=1	At3g46290	262	1e-74	KOG1187	Serine/threonine protein kinase	T	Signal transduction mechanisms	K04733|1|3e-124|402|han:110889369|interleukin-1 receptor-associated kinase 4 [EC:2.7.11.1]		GO:0004674//protein serine/threonine kinase activity;GO:0005524//ATP binding;GO:0004672//protein kinase activity	GO:0016021//integral component of membrane
152	Solyc08g068160.1.1	46630.1	0.024	1	1	1.83	1.164|1.866|1.644|2.650	0.62	4	0.04551	MDSYLKELQGKTSHDPYFNHHNKMIMNKCVFVNGPVIVGAGPSGLAAAACLTSKGVQSLVLERSNCIASLWQLKTYDRLSLHLPKQFCELPLMPFPHDFPTYPTKQQFIKYLESYAITFNIRPLFNQTVVSACYDRNLGLWRIRTDTTTSSTEFVTRWLIVATGENAEAVVPDIEGMEEFDGSIMHTSLYKSGEIFKRKKVLVVGCGNSGMEVCLDLCNHHATPSLVVRDTVHVLPREMLGKSTFGLSMWLLKWLPMRLVDRFLLITSRLLLGDTSRLGLDRPEIGPLELKNLSGKTPVLDVGTLAKIKSGDIKVCPGIKRLLKHHTVEFVNGQTEEYDAIILATGYKSNVPSWLKEKEMFSEKDGLPKRPFPNGWKGECGLYAVGFTKRGLLGASIDA…	100	0	NP_001317920.1	flavin monooxygenase-like protein [Solanum lycopersicum]	69.76	0	sp|Q8VZ59|YUC6_ARATH	Indole-3-pyruvate monooxygenase YUCCA6 OS=Arabidopsis thaliana GN=YUC6 PE=1 SV=1	At5g25620	590	0	KOG1399	Flavin-containing monooxygenase	Q	Secondary metabolites biosynthesis, transport and catabolism	K11816|1|0.0|854|sly:101256506|indole-3-pyruvate monooxygenase [EC:1.14.13.168]	GO:0009851//auxin biosynthetic process	GO:0050661//NADP binding;GO:0004499//N,N-dimethylaniline monooxygenase activity;GO:0050660//flavin adenine dinucleotide binding	-
